# Supplementary material for: Comparative efficacy and safety of treatments for localised prostate cancer: an application of network meta-analysis
Source: PubMed Central journal article supplement — BMJ Open. 2014 May 15;4(5):e004285. doi: 10.1136/bmjopen-2013-004285 (PMC4024605; doi:10.1136/bmjopen-2013-004285), 2014-05-15
Supplement: bmjopen-2013-004285.draft_revisions.pdf [file bmjopen-2013-004285.draft_revisions.pdf]

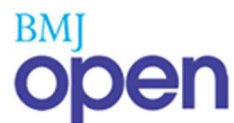

**Comparative Efficacy and Safety of Treatments for Localized Prostate Cancer: An Application of Network Meta-Analysis.**

|                                 |                                                                                                                                                                                                                                                                                                  |
|---------------------------------|--------------------------------------------------------------------------------------------------------------------------------------------------------------------------------------------------------------------------------------------------------------------------------------------------|
| Journal:                        | <i>BMJ Open</i>                                                                                                                                                                                                                                                                                  |
| Manuscript ID:                  | bmjopen-2013-004285                                                                                                                                                                                                                                                                              |
| Article Type:                   | Research                                                                                                                                                                                                                                                                                         |
| Date Submitted by the Author:   | 18-Oct-2013                                                                                                                                                                                                                                                                                      |
| Complete List of Authors:       | Xiong, Tengbin; University of Cambridge, Department of Oncology<br>Turner, Rebecca; MRC Biostatistics Unit,<br>Wei, Yinghui; MRC Clinical Trials Unit,<br>Neal, David; University of Cambridge,<br>Lyratzopoulos, Georgios; University of Cambridge,<br>Higgins, Julian; MRC Biostatistics Unit, |
| <b>Primary Subject Heading</b>: | Research methods                                                                                                                                                                                                                                                                                 |
| Secondary Subject Heading:      | Evidence based practice, Health services research, Oncology, Urology                                                                                                                                                                                                                             |
| Keywords:                       | Prostate cancer, Treatment, Randomised trials, Systematic review, Meta-analysis                                                                                                                                                                                                                  |
|                                 |                                                                                                                                                                                                                                                                                                  |

SCHOLARONE™  
Manuscripts

1  
2  
3 **COMPARATIVE EFFICACY AND SAFETY OF TREATMENTS FOR LOCALIZED PROSTATE**  
4 **CANCER: AN APPLICATION OF NETWORK META-ANALYSIS**  
5  
6  
7

8 **Tengbin Xiong, PhD**

9 *Research Associate, Department of Oncology, University of Cambridge, Box 279*  
10 *(S4), Addenbrooke's Hospital, Hills Road, Cambridge, CB2 0QQ, UK*  
11

12  
13 **Rebecca M Turner, PhD**

14 *Statistician, MRC Biostatistics Unit, Institute of Public Health, Forvie Site, Robinson*  
15 *Way, Cambridge, CB2 0SR, UK*  
16

17  
18 **Yinghui Wei, PhD**

19 *Statistician, London Hub for Trials Methodology Research, MRC Clinical Trials Unit,*  
20 *Aviation House, 125 Kingsway, London WC2B 6NH, UK*  
21

22  
23 **David E Neal, MS, FMedSci, FSB, FRCS, FFPM**

24 *Professor of Surgical Oncology and Hon Consultant Urological Surgeon, Department*  
25 *of Oncology, University of Cambridge, Box 279 (S4), Addenbrooke's Hospital, Hills*  
26 *Road, Cambridge, CB2 0QQ, UK*  
27  
28

29  
30 **Georgios Lyratzopoulos, MD**

31 *Clinical Senior Research Associate in Public Health / Epidemiology, Department of*  
32 *Public Health and Primary Care, Cambridge Centre for Health Services Research,*  
33 *University of Cambridge, Forvie Site, Robinson Way, Cambridge CB2 0SR, UK*  
34

35  
36 **Julian P T Higgins, PhD**

37 *Senior Statistician, MRC Biostatistics Unit, Institute of Public Health, Forvie Site,*  
38 *Robinson Way, Cambridge, CB2 0SR, UK*  
39 *Chair in Evidence Synthesis, Centre for Reviews and Dissemination, University of*  
40 *York, York YO10 5DD, UK*  
41  
42  
43  
44  
45

46 Word count: 2925  
47

48  
49  
50 Key words: *Prostate cancer; Treatment; Randomised trials; Systematic review; Meta-*  
51 *analysis.*  
52

53  
54  
55 Corresponding author: *Tengbin Xiong, Department of Oncology, University of*  
56 *Cambridge, Box 279 (S4), Addenbrooke's Hospital, Hills Road, Cambridge, CB2*  
57 *0QQ, UK*  
58  
59  
60

**ABSTRACT**

**Context:** There is ongoing uncertainty about the optimal management of patients with localized prostate cancer.

**Objective:** To evaluate the comparative efficacy and safety of different treatments for patients with localized prostate cancer.

**Design:** Systematic review with Bayesian network meta-analysis to estimate comparative odds ratios, and a score (0-100%) that, for a given outcome, reflects average rank order of superiority of each treatment compared against all others, using the surface under the cumulative ranking curve (SUCRA) statistic.

**Data sources:** Electronic searches of Medline without language restriction.

**Study selection:** Randomized trials comparing the efficacy and safety of different primary treatments (48 papers from 21 randomized trials included 7,350 men).

**Data extraction:** Two reviewers independently extracted data and assessed risk of bias.

**Results:** Comparative efficacy and safety evidence was available for prostatectomy, external beam radiotherapy (different types and regimens), observational management and cryotherapy, but not high intensity focused ultrasound (HIFU). There was no evidence of superiority for any of the compared treatments in respect of all-cause mortality. Cryotherapy was associated with less gastrointestinal and genitourinary toxicity than radiotherapy (SUCRA: 99% and 77% for gastrointestinal and genitourinary toxicity, respectively).

**Conclusions:** The limited available evidence suggests that different treatments may be optimal for different efficacy and safety outcomes. These findings highlight the importance of informed patient choice and shared-decision making about treatment modality and acceptable trade-offs between different outcomes. More trial evidence is required to reduce uncertainty. Network meta-analysis may be useful to optimise the power of evidence synthesis studies once data from new randomised controlled studies in this field are published in the future.

## ARTICLE SUMMARY

### *Article focus*

- To evaluate the comparative efficacy and safety of different treatments for patients with localized prostate cancer.

### *Key messages*

- Comparative efficacy and safety evidence was available for prostatectomy, external beam radiotherapy (different types and regimens), observational management and cryotherapy, but not high intensity focused ultrasound (HIFU).
- There was no evidence of superiority for any of the compared treatments in respect of all-cause mortality. Different treatments may be optimal for different efficacy and safety outcomes.
- Network meta-analysis may be useful to optimise the power of evidence synthesis studies once data from new randomised controlled studies in this field are published in the future.

### *Strengths and limitations of this study*

- The novel method of network meta-analysis enabled us to integrate evidence from both direct comparisons (treatments compared head-to-head within a randomized trial) and indirect comparisons (treatments compared by combining the results of randomized trials with common comparators).
- This network meta-analysis only included randomised controlled trials and the risk of bias in each included study had been comprehensively assessed by using the Cochrane Collaboration's Risk of Bias tool, which strengthens the robustness of evidence synthesis.
- The number of available randomized controlled trials was small which could be a limitation of the study.

## BACKGROUND

Prostate cancer is a worldwide major public health issue.<sup>1</sup> Nearly 75% of diagnosed cases, however, occur in developed countries,<sup>2</sup> where it is typically the most common cancer in men.<sup>3-4</sup> In the UK, about 40,000 men are diagnosed with prostate cancer and 10,000 men die from it every year.<sup>3</sup> In the US, there are 240,000 new diagnoses of prostate cancer, with 34,000 associated deaths every year.<sup>5</sup> Most patients with prostate cancers are diagnosed at an early stage,<sup>6-7</sup> and many diagnoses are made in asymptomatic men.<sup>8-10</sup>

The main treatment options for localized prostate cancer include radical prostatectomy, external beam radiotherapy and observational management (that is, regular testing of clinical, biochemical or radiological markers or as prompted by occurrence of symptoms).<sup>8</sup> Because some of these treatments are associated with substantial risk of side effects, it is important to try to resolve the current uncertainty about the optimal treatment options.

Some randomized trials have compared the efficacy and safety of two or three treatments. For example, the SPCG-4 trial in Europe and the PIVOT study in the US compared radical prostatectomy with observational management.<sup>11-12</sup> The UK Prostate Testing for Cancer and Treatment ( ProtecT) trial is evaluating treatment effectiveness of active monitoring, radical prostatectomy and external beam radiotherapy for clinically localized prostate cancer in men aged 50-69 years identified through population-based PSA testing.<sup>13</sup> The recruitment phase for the ProtecT trial, which began in 1999, has been completed, but outcomes will not be available until a minimum follow-up period has been accrued.

1  
2  
3 It is unlikely that any single trial will compare all available treatment options. We  
4 therefore performed a network meta-analysis based on a systematic review of  
5 completed randomized trials comparing different interventions for patients with  
6 localized prostate cancer. The network meta-analysis allowed us to integrate  
7 evidence from both direct comparisons (treatments compared head-to-head within a  
8 randomized trial) and indirect comparisons (treatments compared by combining the  
9 results of randomized trials with common comparators).<sup>14-16</sup>  
10  
11  
12  
13  
14  
15  
16  
17  
18  
19  
20  
21  
22  
23  
24  
25  
26  
27  
28  
29  
30  
31  
32  
33  
34  
35  
36  
37  
38  
39  
40  
41  
42  
43  
44  
45  
46  
47  
48  
49  
50  
51  
52  
53  
54  
55  
56  
57  
58  
59  
60

## METHODS

### Eligibility criteria

We sought completed randomized trials in men with localized prostate cancer that had compared two or more of the following interventions (as primary treatment, with or without the same adjuvant therapy in all arms): prostatectomy; radiotherapy including brachytherapy; cryotherapy; high-intensity focused ultrasound (HIFU) and observational management. Observational management is characterized by testing of clinical, biochemical or radiological markers of disease progression at regular intervals (typically every 6 months) or as prompted by the occurrence of new symptoms, possibly leading to either radical or palliative treatment. We opted to use the term 'observational management' in preference to active surveillance or active monitoring because the latter terms typically aim to keep men in a window of curability so that only those who require it undergo radical treatment.

Eligible trials had to have reported any of the following efficacy and safety outcomes: all-cause mortality, prostate cancer mortality and gastrointestinal or genitourinary toxicity. Studies comparing treatment combinations or sequences (e.g. per protocol management by surgery with subsequent radiotherapy) were excluded.

### Identification of studies

We adopted the search strategy of a systematic review that supported the development of clinical guidelines on the diagnosis and treatment of prostate cancer by the UK's National Institute for Health and Clinical Excellence (NICE) in 2008.<sup>8</sup>

Studies had been identified by searching Medline (in 2006) and scanning reference list of papers. We retrieved all relevant randomized trials identified in the NICE guideline and implemented the same search strategies to update the collection of trials. We restricted the search to the period from January 2005 to September 2012.

1  
2  
3 No language limits were placed on the searches (see Appendix 1 for full search  
4 strategies).  
5  
6  
7

### 8 9 **Data extraction**

10  
11 Two reviewers (TX and RT) independently screened all the titles and abstracts of the  
12 studies retrieved by the searches for potentially eligible trials, and then independently  
13 assessed the full articles of these trials to confirm whether they met the eligibility  
14 criteria. The results were checked and discussed by TX and RT to agree upon a final  
15 list of included studies. Using a structured and piloted data collection form, all  
16 relevant data in each included paper were extracted by two reviewers independently  
17 (TX and RT/YW). The data extracted were cross-checked and unresolved  
18 discrepancies were referred to a third reviewer; where necessary, problems were  
19 discussed in a panel meeting (TX, RT, YW, JH and GL) whilst DN acted as a clinical  
20 expert advisor.  
21  
22  
23  
24  
25  
26  
27  
28  
29  
30  
31

32  
33 For each included study, we extracted characteristics of participants and  
34 interventions, outcomes reported and collected, sample size (randomized and  
35 analysed) in each arm, numerical results, losses to follow-up and details of patients  
36 excluded from the analyses.<sup>17</sup> To inform the appropriateness of including studies in  
37 the meta-analysis and facilitate assessment of the strength of the evidence we  
38 assessed the risk of bias in each included study using The Cochrane Collaboration's  
39 Risk of Bias tool.<sup>18</sup> Two reviewers (TX and either RT or YW) completed this  
40 independently and agreed on final assessments. The tool assesses risk of bias  
41 arising from inadequacies in processes of generation of the random allocation  
42 sequence, concealment of the allocation sequence and blinding, and from incomplete  
43 outcome data and selective outcome reporting.  
44  
45  
46  
47  
48  
49  
50  
51  
52  
53  
54  
55  
56  
57  
58  
59  
60



## Outcomes

We analysed all-cause mortality and cancer-related mortality at 5 years, late gastrointestinal and late genitourinary toxicity at 3 years. The choice of these follow-up times was pragmatic, as they were the ones most frequently reported in the included trials. Once these time points had been chosen, we extracted the outcome data from the time nearest to these targeted measurement times. Late gastrointestinal and late genitourinary toxicity were defined as scores  $\geq 2$  measured by the Radiation Therapy Oncology Group (RTOG) questionnaire scale by 3 years follow-up.<sup>19</sup> We have not encompassed biochemical or clinical failure as operational definitions of either of those outcomes tend to be specific to different radical treatment modalities.<sup>20</sup>

## Statistical analyses

Initially, we compared each pair of treatments using direct evidence alone, for each outcome. Separate meta-analyses were performed for each pair-wise comparison of interventions: a random-effects model was fitted within each comparison,<sup>21</sup> with a common between-study heterogeneity variance assumed across comparisons to allow for heterogeneity even when only a single study was available. Results are reported as odds ratios with 95% confidence intervals, for every comparison evaluated directly in one or more studies.

Next, we fitted a network meta-analysis model for each outcome separately,<sup>22</sup> combining direct evidence for each comparison (e.g. from studies comparing interventions A with B) with indirect evidence (e.g. from studies comparing A with C and studies comparing B with C), for all pair-wise comparisons simultaneously. The model accounts explicitly for the binary nature of each outcome using a binomial likelihood function; allows for heterogeneity of treatment effects between trials of the

1  
2  
3 same comparison (assuming the same amount of heterogeneity for each comparison,  
4  
5 irrespective of how many trials address it); and enforces an underlying relationship  
6  
7 between direct and indirect evidence for a particular comparison, assuming these are  
8  
9 consistent between the two sources. For each 'loop' of treatment comparisons from  
10  
11 three or more independent sources and for each outcome, we computed the  
12  
13 difference between estimates from direct and indirect evidence. This provides a  
14  
15 measure of inconsistency between the different sources. We did not implement more  
16  
17 sophisticated methods for testing or adjusting for inconsistency, due to the small  
18  
19 number of loops in the network.  
20

21  
22  
23 Results are reported as odds ratios with 95% credible intervals, for all pair-wise  
24  
25 comparisons of interventions. All analyses were performed within a Bayesian  
26  
27 framework, using Markov chain Monte Carlo methods in WinBUGS (MRC  
28  
29 Biostatistics Unit, Cambridge, UK).<sup>23</sup> Informative prior distributions were used for the  
30  
31 heterogeneity variance, from a published set of distributions for heterogeneity  
32  
33 expected in meta-analyses examining particular intervention and outcome types,<sup>24</sup>  
34  
35 since heterogeneity is imprecisely estimated when the number of studies is small.  
36  
37 For all-cause mortality, a log-normal (-3.93, 1.51<sup>2</sup>) distribution was used. For  
38  
39 gastrointestinal and genitourinary toxicity, a log-normal (-2.01, 1.64<sup>2</sup>) distribution was  
40  
41 used. For cancer-related mortality, a log-normal (-2.89, 1.91<sup>2</sup>) distribution was used.  
42  
43 Vague N (0, 10<sup>4</sup>) priors were used for all other model parameters. Results were  
44  
45 based on 100,000 iterations, following a burn-in of 20,000 iterations.  
46  
47  
48

49  
50 For each outcome, we estimated the probability that each intervention is superior to  
51  
52 all others, the second best, the third best and so on, from the rank orderings of the  
53  
54 treatments at each iteration of the Markov chain. These ranking probabilities were  
55  
56 used to calculate a summary numerical value: the SUCRA (surface under the  
57  
58 cumulative ranking curve).<sup>25</sup> SUCRA values are expressed as percentages; if an  
59  
60

1  
2  
3 intervention is certainly the best, its SUCRA value would be 100%, and if an  
4  
5 intervention is certainly the worst, its SUCRA value would be 0%. If all interventions  
6  
7 are equivalent, we would expect all SUCRA values to be near 50%. We also report  
8  
9 the median ranks and 95% credible intervals for each intervention.  
10  
11  
12  
13  
14  
15  
16  
17  
18  
19  
20  
21  
22  
23  
24  
25  
26  
27  
28  
29  
30  
31  
32  
33  
34  
35  
36  
37  
38  
39  
40  
41  
42  
43  
44  
45  
46  
47  
48  
49  
50  
51  
52  
53  
54  
55  
56  
57  
58  
59  
60

## RESULTS

### Included studies and interventions

The NICE systematic review<sup>8</sup> had identified 20 reports relating to 14 randomized trials.<sup>26-45</sup> Our updated searches retrieved 1,740 studies and identified 39 reports of relevant randomized trials, of which 30 had not been included in the NICE review (Figure 1).<sup>46-75</sup> One of these reports was the sole report of a trial providing data only on acute toxicity,<sup>40</sup> two papers only reported the outcomes of biochemical or clinical failure,<sup>38, 56</sup> these 3 studies were then excluded. In addition to the remaining 47 full papers from peer-reviewed journals, we identified and included in the analysis data from a conference abstract, describing a randomized trial comparing external beam radiotherapy versus watchful waiting,<sup>76</sup> and reporting data on long term mortality not previously reported in full-text related publications.<sup>77-78</sup>

Our searches also identified 16 relevant systematic reviews.<sup>79-94</sup> We scrutinized the reference lists of all these as well as any further systematic reviews identified by the NICE review, and found no further relevant randomized trials.

The 48 identified reports described 21 randomized trials comparing the effectiveness of different treatments for localized prostate cancer.<sup>26-37, 39, 41-55, 57-76</sup> Seventeen trials reported all-cause mortality, 16 trials reported cancer-related mortality, 16 trials reported gastrointestinal (GI) toxicity, 15 trials reported genitourinary (GU) toxicity. The characteristics of included studies are summarized in Appendix 2.

The risk of bias assessments for the included trials are illustrated in Figure 2. Most of the evidence was of moderate to good quality. About half of the studies did not report adequate information about allocation sequence generation and allocation sequence concealment. Unblinded designs were used in all trials included; we judged this

1  
2  
3 unlikely to cause bias for objectively-measured outcomes such as mortality, but  
4 generate bias in the reporting and assessment of patient-reported toxicity outcomes.  
5  
6 The small number of studies precluded the investigation of potential reporting biases  
7 across studies (for example using funnel plots). Our searches were appropriate, but  
8 the possibility of publication bias cannot be excluded. It is unclear, however, whether  
9 reporting biases would tend to favour any particular treatment (see Appendix 3 for  
10 details of bias assessments for included trials).  
11  
12  
13  
14  
15  
16  
17  
18

19 We categorized the interventions into the following eight categories: observational  
20 management; prostatectomy; conventional radiotherapy; conventional radiotherapy-  
21 hypofractionated; conformal low dose (LD) radiotherapy; conformal high dose (HD)  
22 radiotherapy; conformal LD radiotherapy-hypofractionated; and cryotherapy. Twenty  
23 trials had two intervention arms. One trial compared three interventions;<sup>54</sup> since two  
24 of the three interventions were very similar and both met our definition of conformal  
25 LD radiotherapy-hypofractionated, we combined the data from these two arms and  
26 regarded the trial as a two-treatment comparison (conformal LD radiotherapy-  
27 hypofractionated versus conformal HD radiotherapy). None of the reviewed studies  
28 assessed brachytherapy and HIFU. Figure 3 illustrates the full network of  
29 comparisons. There were two closed loops of comparisons, one connecting  
30 prostatectomy, observational management and radiotherapy modalities; and the  
31 other connecting different radiotherapy modalities. No inconsistency was detected in  
32 our estimates of the difference between direct and indirect evidence; however,  
33 precision was very low. Cryotherapy only had a single link to the network.  
34  
35  
36  
37  
38  
39  
40  
41  
42  
43  
44  
45  
46  
47  
48  
49  
50  
51  
52  
53  
54  
55  
56  
57  
58  
59  
60

### All-cause mortality

All-cause mortality was reported in 17 trials, covering all the eight interventions of interest. There is no evidence of superiority of any treatment for all-cause mortality. For each pairwise comparison of interventions, the 95% intervals for odds ratios were wide and included 1. The lower-left triangle of results in Table 1 presents odds ratios estimated from direct evidence alone, while the upper-right triangle of results presents odds ratios estimated from the network meta-analysis. The intervals are slightly narrower when based on indirect as well as direct evidence rather than direct evidence alone. The SUCRA values presented in Table 2 summarize the ranking information for all interventions. With respect to all-cause mortality, the highest SUCRA values are 69% for conformal LD radioterhapy-hypofractionated and 63% for conformal HD radiotherapy, indicating that these are most likely to be among the best treatments for this outcome. However, there is very high uncertainty in the rankings of the interventions, as indicated by wide 95% credible intervals.

### Cancer-related mortality

Cancer-related mortality was reported in 16 trials, covering eight of the interventions. This was a rare outcome in most treatment groups, as expected for patients with localized prostate cancer with a 5 year end point. Odds ratio estimates had wide 95% credible intervals, particularly in comparisons for which only indirect evidence was available, and there was no evidence of superiority for any of the comparator treatments (Table 3). Based on direct comparisons alone, conformal HD radiotherapy was superior to conventional radiotherapy [odds ratio 0.21 (95% interval 0.03, 0.97)] and prostatectomy was superior to observational management [odds ratio 0.60 (95% interval 0.37, 0.98)].

### Gastrointestinal and genitourinary toxicity

Late gastrointestinal toxicity was reported in 16 trials and late genitourinary toxicity was reported in 15 trials. There was evidence that cryotherapy resulted in fewer adverse gastrointestinal events than radiotherapy treatments (estimated odds ratios comparing cryotherapy against the five radiotherapy options ranged from 0.12 to 0.24, whilst all but one of the respective 95% credible intervals excluded 1). The SUCRA value of 99% for cryotherapy and the median rank of 1 (95% interval 1, 2) suggest that cryotherapy is almost certainly superior among the six treatments included in the network meta-analysis in relation to adverse gastrointestinal events (Table 2 and 4). There was also evidence that gastrointestinal toxicity was more likely with conformal HD radiotherapy than with conformal LD radiotherapy. Interpretation of such findings for toxicity should be more cautious than for the other outcomes, due to a concern that lack of blinding could have led to a risk of detection bias. For genitourinary toxicity, there was no evidence favouring one intervention over another (Table 5), although cryotherapy tended to receive better rankings than the five radiotherapy treatments (Table 2), and the odds ratio estimates favour cryotherapy, but the 95% intervals all included 1.

Figure 1. Flow chart of the inclusion process of the studies for network meta-analysis

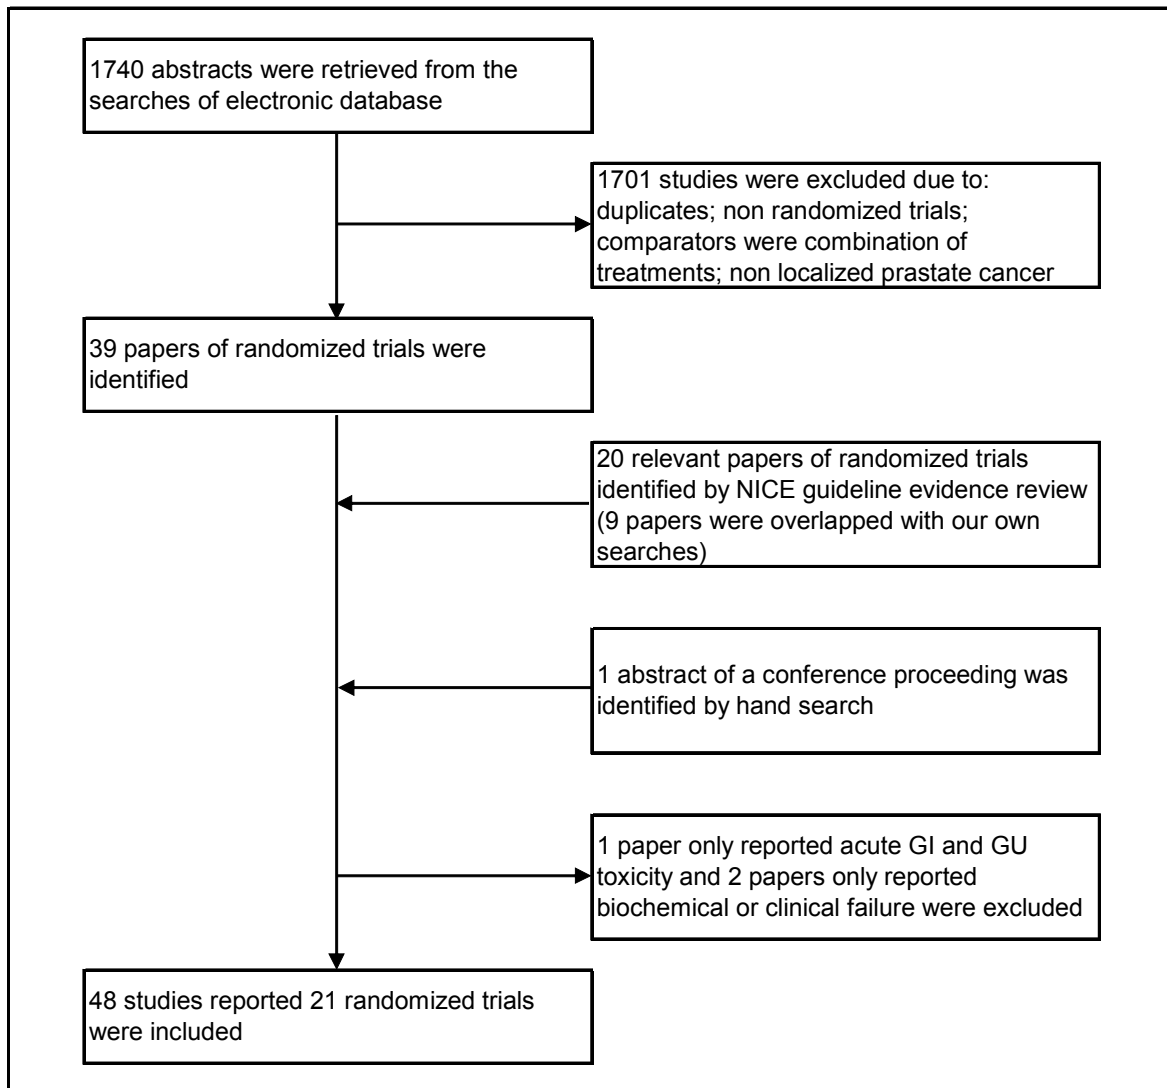

Only



Figure 2. Risk of bias assessments for the included randomized trials

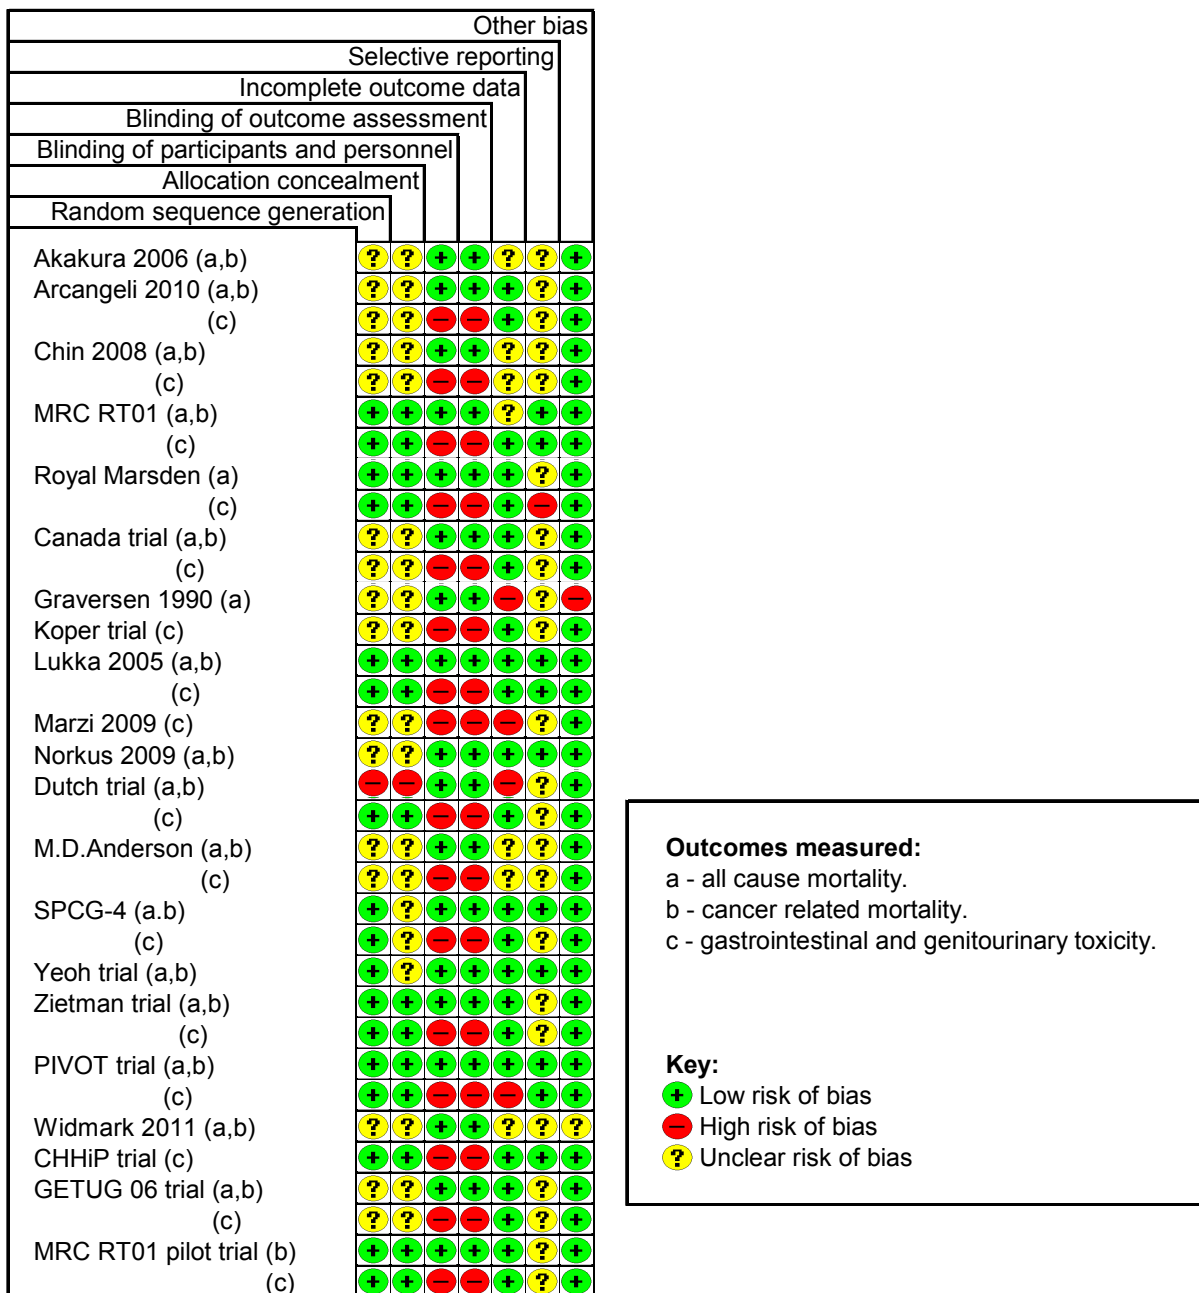

1  
2  
3  
4  
5  
6  
7  
8  
9  
10  
11  
12  
13  
14  
15  
16  
17  
18  
19  
20  
21  
22  
23  
24  
25  
26  
27  
28  
29  
30  
31  
32  
33  
34  
35  
36  
37  
38  
39  
40  
41  
42  
43  
44  
45  
46  
47  
48  
49  
50  
51  
52  
53  
54  
55  
56  
57  
58  
59  
60

1  
2  
3  
4  
5  
6  
7  
8  
9  
10  
11  
12  
13  
14  
15  
16  
17  
18  
19  
20  
21  
22  
23  
24  
25  
26  
27  
28  
29  
30  
31  
32  
33  
34  
35  
36  
37  
38  
39  
40  
41  
42  
43  
44  
45  
46  
47  
48  
49  
50  
51  
52  
53  
54  
55  
56  
57  
58  
59  
60

**Figure 3.** Network of comparisons of treatments for localized prostate cancer showing numbers of trials in which each pairwise comparison had been made

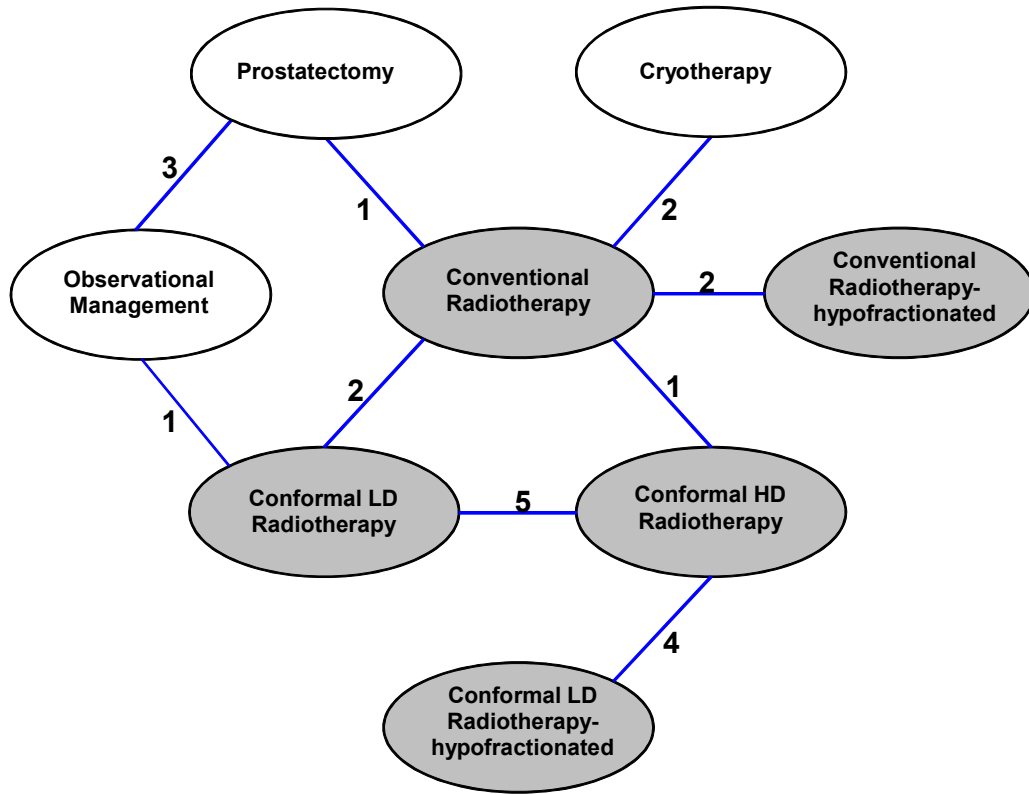

**Abbreviations:** LD: low dose; HD: high dose.  
Grey-shaded ovals indicate external radiotherapy modalities.

**Table 1.** All-cause mortality: odds ratios (with 95% intervals) for each pair-wise comparison of interventions, based on direct evidence alone (lower-left triangle) or direct and indirect evidence (upper-right triangle).

| Intervention                               | Observational management      | Prostatectomy                 | Conventional radiotherapy     | Conventional radiotherapy-hypofractionated | Conformal LD radiotherapy     | Conformal HD radiotherapy     | Conformal LD radiotherapy-hypofractionated | Cryotherapy      |
|--------------------------------------------|-------------------------------|-------------------------------|-------------------------------|--------------------------------------------|-------------------------------|-------------------------------|--------------------------------------------|------------------|
| Observational management                   |                               | 0.79 (0.61,1.02)              | 0.84 (0.48,1.57)              | 0.72 (0.37,1.49)                           | 0.73 (0.44,1.26)              | 0.70 (0.40,1.28)              | 0.53 (0.10,2.88)                           | 0.76 (0.28,1.98) |
| Prostatectomy                              | <sup>3</sup> 0.80 (0.61,1.06) |                               | 1.06 (0.60,2.02)              | 0.91 (0.46,1.90)                           | 0.92 (0.54,1.64)              | 0.88 (0.49,1.66)              | 0.67 (0.12,3.65)                           | 0.96 (0.36,2.56) |
| Conventional radiotherapy                  | -                             | <sup>1</sup> 1.34 (0.55,3.24) |                               | 0.85 (0.59,1.24)                           | 0.86 (0.55,1.35)              | 0.82 (0.51,1.35)              | 0.62 (0.11,3.21)                           | 0.90 (0.41,1.89) |
| Conventional radiotherapy-hypofractionated | -                             | -                             | <sup>2</sup> 0.85 (0.59,1.24) |                                            | 1.01 (0.56,1.80)              | 0.97 (0.53,1.78)              | 0.73 (0.13,3.86)                           | 1.05 (0.44,2.42) |
| Conformal LD radiotherapy                  | <sup>1</sup> 0.66 (0.35,1.21) | -                             | <sup>1</sup> 0.92 (0.50,1.72) | -                                          |                               | 0.96 (0.72,1.29)              | 0.72 (0.14,3.51)                           | 1.04 (0.42,2.49) |
| Conformal HD radiotherapy                  | -                             | -                             | <sup>1</sup> 0.87 (0.39,1.92) | -                                          | <sup>4</sup> 0.95 (0.70,1.31) |                               | 0.74 (0.14,3.61)                           | 1.09 (0.43,2.64) |
| Conformal LD radiotherapy-hypofractionated | -                             | -                             | -                             | -                                          | -                             | <sup>2</sup> 0.78 (0.13,4.25) |                                            | 1.47 (0.22,9.40) |
| Cryotherapy                                | -                             | -                             | <sup>2</sup> 0.90 (0.41,2.02) | -                                          | -                             | -                             | -                                          |                  |

LD: low dose; HD: high dose.

Lower-left results compare row-defining interventions against column-defining interventions. Upper-right results compare column-defining interventions against row-defining interventions.

In the meta-analysis of direct comparisons (reported in lower-left triangle), between-trial heterogeneity  $\tau^2$  was estimated as 0.009 (95% interval 0.001 to 0.08).

In the network meta-analysis (reported in upper-right triangle), between-trial heterogeneity  $\tau^2$  was estimated as 0.009 (95% interval 0.001 to 0.07).

The small superscript numbers in the cells of lower-left triangle indicate the numbers of randomized trials which compared the two interventions directly.

**Table 2.** Ranking of interventions with respect to all-cause and cancer-related mortality, adverse gastrointestinal and genitourinary events: SUCRA (Surface Under the Cumulative RAnking curve) values and median ranks (with 95% intervals).†

| Intervention                               | All-cause mortality |                            | Cancer-related mortality |                            | Adverse gastrointestinal events |                            | Adverse genitourinary events |                            |
|--------------------------------------------|---------------------|----------------------------|--------------------------|----------------------------|---------------------------------|----------------------------|------------------------------|----------------------------|
|                                            | SUCRA value         | Median rank (95% interval) | SUCRA value              | Median rank (95% interval) | SUCRA value                     | Median rank (95% interval) | SUCRA value                  | Median rank (95% interval) |
| Observational management                   | 18%                 | 7 (2, 8)                   | 30%                      | 6 (3, 8)                   | -                               | -                          | -                            | -                          |
| Prostatectomy                              | 49%                 | 5 (1, 7)                   | 64%                      | 4 (1, 7)                   | -                               | -                          | -                            | -                          |
| Conventional radiotherapy                  | 35%                 | 6 (2, 8)                   | 16%                      | 7 (4, 8)                   | 43%                             | 4 (2, 6)                   | 51%                          | 3 (1, 6)                   |
| Conventional radiotherapy-hypofractionated | 58%                 | 4 (1, 8)                   | 44%                      | 5 (1, 8)                   | 42%                             | 4 (1, 6)                   | 50%                          | 3 (1, 6)                   |
| Conformal LD radiotherapy                  | 57%                 | 4 (1, 7)                   | 61%                      | 4 (2, 7)                   | 67%                             | 2 (2, 4)                   | 66%                          | 3 (1, 5)                   |
| Conformal HD radiotherapy                  | 63%                 | 3 (1, 7)                   | 75%                      | 2 (1, 6)                   | 19%                             | 5 (3, 6)                   | 30%                          | 5 (2, 6)                   |
| Conformal LD radiotherapy-hypofractionated | 69%                 | 1 (1, 8)                   | 85%                      | 1 (1, 8)                   | 30%                             | 5 (2, 6)                   | 26%                          | 5 (1, 6)                   |
| Cryotherapy                                | 50%                 | 4 (1, 8)                   | 24%                      | 7 (2, 8)                   | 99%                             | 1 (1, 2)                   | 77%                          | 1 (1, 6)                   |

† The surface under the cumulative ranking curve (SUCRA) value is a numerical summary of the estimated probabilities that each treatment is the best, second best, third best (and so on) for that particular outcome. Higher values indicate higher rankings compared with other treatments. For example, for cryotherapy, the high SUCRA value of 99% and median rank of 1 for adverse gastrointestinal events shows that cryotherapy is expected to be superior with respect to this outcome.

LD: low dose; HD: high dose.

**Table 3.** Prostate cancer-caused mortality: odds ratios (with 95% intervals) for each pair-wise comparison of interventions, based on direct evidence alone (lower-left triangle) or direct and indirect evidence (upper-right triangle).

| Intervention                               | Observational management      | Prostatectomy                 | Conventional radiotherapy     | Conventional radiotherapy-hypofractionated | Conformal LD radiotherapy     | Conformal HD radiotherapy      | Conformal LD radiotherapy-hypofractionated | Cryotherapy       |
|--------------------------------------------|-------------------------------|-------------------------------|-------------------------------|--------------------------------------------|-------------------------------|--------------------------------|--------------------------------------------|-------------------|
| Observational management                   |                               | 0.63 (0.40,1.02)              | 1.39 (0.49,4.16)              | 0.90 (0.24,3.42)                           | 0.63 (0.29,1.31)              | 0.52 (0.22,1.19)               | 0.13 (0.00*,3.59)                          | 1.37 (0.28,6.89)  |
| Prostatectomy                              | <sup>2</sup> 0.60 (0.37,0.98) |                               | 2.20 (0.82,6.37)              | 1.42 (0.39,5.19)                           | 0.99 (0.42,2.26)              | 0.83 (0.32,2.00)               | 0.20 (0.00*,6.07)                          | 2.16 (0.46,10.9)  |
| Conventional radiotherapy                  | -                             | <sup>1</sup> 1.65 (0.53,5.44) |                               | 0.64 (0.29,1.41)                           | 0.45 (0.14,1.30)              | 0.38 (0.12,1.06)               | 0.09 (0.00*,3.08)                          | 0.98 (0.28,3.35)  |
| Conventional radiotherapy-hypofractionated | -                             | -                             | <sup>2</sup> 0.65 (0.28,1.43) |                                            | 0.70 (0.18,2.65)              | 0.59 (0.15,2.16)               | 0.14 (0.00*,5.08)                          | 1.51 (0.36,6.54)  |
| Conformal LD radiotherapy                  | <sup>1</sup> 0.70 (0.31,1.57) | -                             | -                             | -                                          |                               | 0.84 (0.52,1.30)               | 0.20 (0.00*,5.73)                          | 2.20 (0.44,11.4)  |
| Conformal HD radiotherapy                  | -                             | -                             | <sup>1</sup> 0.21 (0.03,0.97) | -                                          | <sup>5</sup> 0.86 (0.53,1.37) |                                | 0.25 (0.00*,6.79)                          | 2.61 (0.53,14.1)  |
| Conformal LD radiotherapy-hypofractionated | -                             | -                             | -                             | -                                          | -                             | <sup>2</sup> 0.22 (0.00*,6.85) |                                            | 11.2 (0.24,55.42) |
| Cryotherapy                                | -                             | -                             | <sup>2</sup> 0.96 (0.27,3.46) | -                                          | -                             | -                              | -                                          |                   |

LD: low dose; HD: high dose.

\* Odds ratio was less than 0.005.

Lower-left results compare row-defining interventions against column-defining interventions. Upper-right results compare column-defining interventions against row-defining interventions.

In the meta-analysis of direct comparisons (reported in lower-left triangle), between-trial heterogeneity  $\tau^2$  was estimated as 0.02 (95% interval 0.001 to 0.31).

In the network meta-analysis (reported in upper-right triangle), between-trial heterogeneity  $\tau^2$  was estimated as 0.02 (95% interval 0.001 to 0.29).

The small superscript numbers in the cells of lower-left triangle indicate the numbers of randomized trials which compared the two interventions directly.

**Table 4.** Adverse gastrointestinal events: odds ratios (with 95% intervals) for each pair-wise comparison of interventions, based on direct evidence alone (lower-left triangle) or direct and indirect evidence (upper-right triangle).

| Intervention                               | Observational management      | Prostatectomy | Conventional radiotherapy     | Conventional radiotherapy-hypofractionated | Conformal LD radiotherapy     | Conformal HD radiotherapy     | Conformal LD radiotherapy-hypofractionated | Cryotherapy      |
|--------------------------------------------|-------------------------------|---------------|-------------------------------|--------------------------------------------|-------------------------------|-------------------------------|--------------------------------------------|------------------|
| Observational management                   |                               | -             | -                             | -                                          | -                             | -                             | -                                          | -                |
| Prostatectomy                              | <sup>2</sup> 0.84 (0.33,1.88) |               | -                             | -                                          | -                             | -                             | -                                          | -                |
| Conventional radiotherapy                  | -                             | -             |                               | 1.01 (0.19,5.29)                           | 0.72 (0.29,1.59)              | 1.42 (0.57,3.39)              | 1.26 (0.35,4.30)                           | 0.17 (0.04,0.51) |
| Conventional radiotherapy-hypofractionated | -                             | -             | <sup>1</sup> 1.00 (0.22,4.56) |                                            | 0.70 (0.11,4.37)              | 1.40 (0.21,9.02)              | 1.24 (0.15,9.76)                           | 0.17 (0.02,1.19) |
| Conformal LD radiotherapy                  | -                             | -             | <sup>2</sup> 0.46 (0.17,1.16) | -                                          |                               | 1.98 (1.18,3.59)              | 1.77 (0.63,5.11)                           | 0.24 (0.05,0.96) |
| Conformal HD radiotherapy                  | -                             | -             | <sup>1</sup> 2.66 (0.85,8.62) | -                                          | <sup>5</sup> 1.73 (1.07,2.97) |                               | 0.89 (0.36,2.15)                           | 0.12 (0.02,0.48) |
| Conformal LD radiotherapy-hypofractionated | -                             | -             | -                             | -                                          | -                             | <sup>3</sup> 0.89 (0.39,1.96) |                                            | 0.14 (0.02,0.70) |
| Cryotherapy                                | -                             | -             | <sup>2</sup> 0.18 (0.05,0.50) | -                                          | -                             | -                             | -                                          |                  |

LD: low dose; HD: high dose.

Lower-left results compare row-defining interventions against column-defining interventions. Upper-right results compare column-defining interventions against row-defining interventions.

The comparison of prostatectomy with observational management was not linked to the rest of the network, so this evidence was included in the meta-analysis of direct comparisons only.

In the meta-analysis of direct comparisons (reported in lower-left triangle), between-trial heterogeneity  $\tau^2$  was estimated as 0.14 (95% interval 0.01 to 0.97). In the network meta-analysis (reported in upper-right triangle), between-trial heterogeneity  $\tau^2$  was estimated as 0.24 (95% interval 0.02 to 1.23).

The small superscript numbers in the cells of lower-left triangle indicate the numbers of randomized trials which compared the two interventions directly.

**Table 5.** Adverse genitourinary events: odds ratios (with 95% intervals) for each pair-wise comparison of interventions, based on direct evidence alone (lower-left triangle) or direct and indirect evidence (upper-right triangle).

| Intervention                               | Observational management         | Prostatectomy | Conventional radiotherapy        | Conventional radiotherapy-hypofractionated | Conformal LD radiotherapy        | Conformal HD radiotherapy        | Conformal LD radiotherapy-hypofractionated | Cryotherapy      |
|--------------------------------------------|----------------------------------|---------------|----------------------------------|--------------------------------------------|----------------------------------|----------------------------------|--------------------------------------------|------------------|
| Observational management                   |                                  | -             | -                                | -                                          | -                                | -                                | -                                          | -                |
| Prostatectomy                              | <sup>2</sup> 2.27<br>(1.34,3.90) |               | -                                | -                                          | -                                | -                                | -                                          | -                |
| Conventional radiotherapy                  | -                                | -             |                                  | 1.00 (0.34,2.90)                           | 0.91 (0.54,1.51)                 | 1.19 (0.69,2.11)                 | 1.41 (0.49,4.07)                           | 0.66 (0.22,2.00) |
| Conventional radiotherapy-hypofractionated | -                                | -             | <sup>1</sup> 1.01<br>(0.34,3.00) |                                            | 0.90 (0.27,2.97)                 | 1.19 (0.36,4.04)                 | 1.41 (0.31,6.44)                           | 0.66 (0.14,3.04) |
| Conformal LD radiotherapy                  | -                                | -             | <sup>2</sup> 0.80<br>(0.43,1.51) | -                                          |                                  | 1.32 (0.97,1.86)                 | 1.56 (0.61,4.09)                           | 0.73 (0.21,2.52) |
| Conformal HD radiotherapy                  | -                                | -             | <sup>1</sup> 1.53<br>(0.62,3.82) | -                                          | <sup>5</sup> 1.28<br>(0.93,1.86) |                                  | 1.18 (0.48,2.92)                           | 0.55 (0.16,1.91) |
| Conformal LD radiotherapy-hypofractionated | -                                | -             | -                                | -                                          | -                                | <sup>2</sup> 1.17<br>(0.48,2.91) |                                            | 0.47 (0.10,2.15) |
| Cryotherapy                                | -                                | -             | <sup>2</sup> 0.68<br>(0.22,2.03) | -                                          | -                                | -                                | -                                          |                  |

LD: low dose; HD: high dose.

Lower-left results compare row-defining interventions against column-defining interventions. Upper-right results compare column-defining interventions against row-defining interventions.

The comparison of prostatectomy with observational management was not linked to the rest of the network, so this evidence was included in the meta-analysis of direct comparisons only.

In the meta-analysis of direct comparisons (reported in lower-left triangle), between-trial heterogeneity  $\tau^2$  was estimated as 0.04 (95% interval 0.003 to 0.29). In the network meta-analysis (reported in upper-right triangle), between-trial heterogeneity  $\tau^2$  was estimated as 0.04 (95% interval 0.002 to 0.26).

The small superscript numbers in the cells of lower-left triangle indicate the numbers of randomized trials which compared the two interventions directly.

## DISCUSSION

Our study is mainly a methodological contribution to an area of modern medicine with sparse randomised controlled evidence. We highlight the potential for network meta-analysis to be used for evidence synthesis in this research area, particularly after the forthcoming advent of further randomised controlled trial data. The present state of the evidence is that considering data from 21 trials including 7,350 patients randomly assigned among eight different intervention regimes, we found substantial uncertainty about the relative efficacy and safety of different interventions in respect of the studied outcomes.

Our analyses have several strengths. Using network meta-analysis, we were able to combine simultaneously all relevant evidence on treating patients with localized prostate cancer, even in the absence of direct comparative evidence for some treatment pairs, encompassing four efficacy and safety outcomes. Assumptions of consistency between direct and indirect evidence were tested; however, these tests had little power due to the relatively small number of trials available in most direct comparisons. Informative priors based on external evidence were used for heterogeneity variances, to increase precision for heterogeneity variances and improve estimation of treatment differences. To our knowledge, this is the first application of network meta-analysis incorporating data-based informative priors for heterogeneity. We had no data on the use of adjuvant hormonal therapy combined with radiotherapy.

Our findings have implications for research funding prioritisation and study design; and for clinical practice. The study identified particular 'weak links' in the network of comparative treatment options, which should be prioritized for future investment in randomized controlled trials. This is particularly applicable for studies comparing HIFU (which currently is bereft of any comparative evidence) and brachytherapy against all other treatment options, and also for trials examining the comparative efficacy and safety of prostatectomy versus conformal



1  
2  
3 radiotherapy modalities. For clinicians, and for men diagnosed with prostate cancer, our  
4 findings highlight that the optimal treatment options may be different in respect of different  
5 outcomes: patients need to be given appropriate information about the uncertainty  
6 surrounding treatment choice currently, and be allowed to opt for 'trade-offs' between  
7 efficacy and safety outcomes as they judge appropriately.<sup>95</sup> It is also important to note that  
8 observational studies have consistently shown that radical prostatectomy has better cause-  
9 specific mortality outcomes compared with radiotherapy.<sup>96-99</sup>  
10  
11  
12  
13  
14  
15  
16  
17  
18

19 In conclusion, clinically important information from high quality randomized trials is still  
20 needed to inform decision making regarding primary treatment options for men with localized  
21 prostate cancer. The upcoming results of the ProtecT study,<sup>13</sup> which is evaluating  
22 effectiveness of multiple therapies in men with PSA-detected localized prostate cancer,  
23 together with other treatment studies in progress, will hopefully contribute to the evidence  
24 base. It is however unlikely that evidential uncertainty about all relevant and important  
25 outcomes will be resolved by these trials, and an updated network meta-analysis  
26 incorporating new evidence may be useful to synthesize the new with the existing evidence.  
27 We demonstrate a high degree of uncertainty about treatment superiority in the management  
28 of localized prostate cancer. Clinicians and patients need to grapple with this uncertainty in  
29 the context of shared-decision making.  
30  
31  
32  
33  
34  
35  
36  
37  
38  
39  
40  
41  
42  
43  
44  
45  
46  
47  
48  
49  
50  
51  
52  
53  
54  
55  
56  
57  
58  
59  
60

1  
2  
3 **Funding and Financial Disclosure:** TX was funded by the National Institute for Health  
4 Research Health Technology Assessment (NIHR HTA) program (HTA 96/20/99). The  
5 funders had no role in study design, data collection and analysis, decision to publish, or  
6 preparation of the manuscript.  
7  
8  
9

10 **Author Contributions:** TX, RT, GL, and JH conceived and designed the study. TX  
11 performed the literature searches. TX, RT, YW, GL, and JH performed the literature review  
12 and data extraction. TX, RT, YW, GL, and JH analyzed the data. TX wrote the first draft of  
13 the manuscript. TX, RT, YW, DN, GL, and JH contributed to the writing of the manuscript.  
14  
15  
16

17  
18 **Competing Interests:** The authors declare that no competing interests exist.  
19  
20  
21  
22  
23  
24  
25  
26  
27  
28  
29  
30  
31  
32  
33  
34  
35  
36  
37  
38  
39  
40  
41  
42  
43  
44  
45  
46  
47  
48  
49  
50  
51  
52  
53  
54  
55  
56  
57  
58  
59  
60

## REFERENCES

1. Jemal A, Bray F, Center MM, Ferlay J, Ward E, Forman D. Global cancer statistics. *CA Cancer J Clin*. Mar-Apr 2011;61(2):69-90.
2. Ferlay J, Shin HR, Bray F, Forman D, Mathers C, Parkin DM. *GLOBOCAN 2008 v1.2, Cancer Incidence and Mortality Worldwide: IARC CancerBase No. 10*. Lyon, France: International Agency for Research on Cancer; 2010. Available from: <http://globocan.iarc.fr>, accessed on 08 Aug 2011.
3. Cancer Research UK. Prostate cancer - UK incidence statistics. <http://info.cancerresearchuk.org/cancerstats/types/prostate/incidence/>. Accessed 08 Aug, 2011.
4. Howlader N, Noone AM, Krapcho M, Neyman N, Aminou R, Waldron W, Altekruse SF, Kosary CL, Ruhl J, Tatalovich Z, Cho H, Mariotto A, et al. SEER Cancer Statistics Review, 1975-2008, National Cancer Institute. Bethesda, MD, [http://seer.cancer.gov/csr/1975\\_2008/](http://seer.cancer.gov/csr/1975_2008/), based on November 2010 SEER data submission, posted to the SEER web site. 2011.
5. National Cancer Institute. Prostate Cancer. <http://www.cancer.gov/cancertopics/types/prostate>. Accessed 08 Aug, 2011.
6. National Cancer Institute. Cancer advances in focus - prostate cancer. <http://www.cancer.gov/cancertopics/factsheet/cancer-advances-in-focus/prostate>. Accessed 08 Aug, 2011.
7. Lyrtzopoulos G, Barbiere JM, Greenberg DC, Wright KA, Neal DE. Population based time trends and socioeconomic variation in use of radiotherapy and radical surgery for prostate cancer in a UK region: continuous survey. *BMJ*. 2010;340:c1928.
8. *National Collaborating Centre for Cancer. NICE clinical guideline 58. Prostate cancer: diagnosis and treatment. Evidence review*. London: National Institute for Health and Clinical Excellence; 2008.
9. Heidenreich A, Bastian PJ, Bellmunt J, Bolla M, Joniau S, Mason MD, Matveev V, Mottet N, van der Kwast TH, Wiegel T, Zattoni F. *Guidelines on prostate cancer*. European Association of Urology; 2012.
10. Thompson I, Thrasher JB, Aus G, Burnett AL, Canby-Hagino ED, Cookson MS, D'Amico AV, Dmochowski RR, Eton DT, Forman JD, Goldenberg SL, Hernandez J, et al. *Guideline for the Management of Clinically Localized Prostate Cancer: 2007 Update*. American Urological Association; 2011.
11. Andersson SO, Andren O, Lyth J, Stark JR, Henriksson M, Adami HO, Carlsson P, Johansson JE. Managing localized prostate cancer by radical prostatectomy or watchful waiting: Cost analysis of a randomized trial (SPCG-4). *Scand J Urol Nephrol*. Apr 2011;45(3):177-183.
12. Wilt TJ, Brawer MK, Barry MJ, Jones KM, Kwon Y, Gingrich JR, Aronson WJ, Nsouli I, Iyer P, Cartagena R, Snider G, Roehrborn C, et al. The Prostate cancer Intervention Versus Observation Trial:VA/NCI/AHRQ Cooperative Studies Program #407 (PIVOT): design and baseline results of a randomized controlled trial comparing radical prostatectomy to watchful waiting for men with clinically localized prostate cancer. *Contemp Clin Trials*. Jan 2009;30(1):81-87.

- 1  
2  
3 **13.** Donovan J, Mills N, Smith M, Brindle L, Jacoby A, Peters T, Frankel S, Neal D,  
4 Hamdy F. Quality improvement report: Improving design and conduct of randomised  
5 trials by embedding them in qualitative research: ProtecT (prostate testing for cancer  
6 and treatment) study. Commentary: presenting unbiased information to patients can  
7 be difficult. *BMJ*. Oct 5 2002;325(7367):766-770.
- 8  
9 **14.** Caldwell DM, Ades AE, Higgins JP. Simultaneous comparison of multiple treatments:  
10 combining direct and indirect evidence. *BMJ*. Oct 15 2005;331(7521):897-900.
- 11  
12 **15.** Lu G, Ades AE. Combination of direct and indirect evidence in mixed treatment  
13 comparisons. *Stat Med*. Oct 30 2004;23(20):3105-3124.
- 14  
15 **16.** Salanti G, Higgins JP, Ades AE, Ioannidis JP. Evaluation of networks of randomized  
16 trials. *Stat Methods Med Res*. Jun 2008;17(3):279-301.
- 17  
18 **17.** Higgins JPT, Green S. *Cochrane Handbook for Systematic Reviews of Interventions*  
19 *Version 5.1.0 [updated March 2011]*. The Cochrane Collaboration. Available from  
20 [www.cochrane-handbook.org](http://www.cochrane-handbook.org); 2011.
- 21  
22 **18.** Higgins JP, Altman DG, Gotzsche PC, Juni P, Moher D, Oxman AD, Savovic J,  
23 Schulz KF, Weeks L, Sterne JA. The Cochrane Collaboration's tool for assessing risk  
24 of bias in randomised trials. *BMJ*. 2011;343:d5928.
- 25  
26 **19.** Pilepich MV, Krall JM, Sause WT, Johnson RJ, Russ HH, Hanks GE, Perez CA,  
27 Zininger M, Martz KL, Gardner P. Correlation of radiotherapeutic parameters and  
28 treatment related morbidity in carcinoma of the prostate--analysis of RTOG study 75-  
29 06. *Int J Radiat Oncol Biol Phys*. Mar 1987;13(3):351-357.
- 30  
31 **20.** Nielsen ME, Makarov DV, Humphreys E, Mangold L, Partin AW, Walsh PC. Is it  
32 possible to compare PSA recurrence-free survival after surgery and radiotherapy  
33 using revised ASTRO criterion--"nadir + 2"? *Urology*. Aug 2008;72(2):389-393;  
34 discussion 394-385.
- 35  
36 **21.** Smith TC, Spiegelhalter DJ, Thomas A. Bayesian approaches to random-effects  
37 meta-analysis: a comparative study. *Stat Med*. Dec 30 1995;14(24):2685-2699.
- 38  
39 **22.** Dias S, Welton NJ, Sutton AJ, Ades AE. NICE DSU Technical Support Document 2:  
40 A Generalised Linear Modelling Framework for Pairwise and Network Meta-Analysis  
41 of Randomised Controlled Trials. 2011; <http://www.nicedsu.org.uk>. Accessed April,  
42 2012.
- 43  
44 **23.** Lunn DJ, Thomas A, Best N, Spiegelhalter D. WinBUGS - A Bayesian modelling  
45 framework: Concepts, structure, and extensibility. *Stat Comput*. Oct 2000;10(4):325-  
46 337.
- 47  
48 **24.** Turner RM, Davey J, Clarke MJ, Thompson SG, Higgins JPT. Predicting the extent of  
49 heterogeneity in meta-analysis, using empirical data from the Cochrane Database of  
50 Systematic Reviews. *International Journal of Epidemiology*. in press.
- 51  
52 **25.** Salanti G, Ades AE, Ioannidis JP. Graphical methods and numerical summaries for  
53 presenting results from multiple-treatment meta-analysis: an overview and tutorial. *J*  
54 *Clin Epidemiol*. Feb 2011;64(2):163-171.
- 55  
56 **26.** Akakura K, Suzuki H, Ichikawa T, Fujimoto H, Maeda O, Usami M, Hirano D,  
57 Takimoto Y, Kamoto T, Ogawa O, Sumiyoshi Y, Shimazaki J, et al. A randomized  
58  
59  
60

- 1  
2  
3 trial comparing radical prostatectomy plus endocrine therapy versus external beam  
4 radiotherapy plus endocrine therapy for locally advanced prostate cancer: results at  
5 median follow-up of 102 months. *Jpn J Clin Oncol*. Dec 2006;36(12):789-793.  
6
- 7 **27.** Bill-Axelsson A, Holmberg L, Ruutu M, Haggman M, Andersson SO, Bratell S,  
8 Spangberg A, Busch C, Nordling S, Garmo H, Palmgren J, Adami HO, et al. Radical  
9 prostatectomy versus watchful waiting in early prostate cancer. *N Engl J Med*. May  
10 12 2005;352(19):1977-1984.  
11
- 12 **28.** Chin JL, Ng CK, Touma NJ, Pus NJ, Hardie R, Abdelhady M, Rodrigues G, Radwan  
13 J, Venkatesan V, Moussa M, Downey DB, Bauman G. Randomized trial comparing  
14 cryoablation and external beam radiotherapy for T2C-T3B prostate cancer. *Prostate  
15 Cancer Prostatic Dis*. 2008;11(1):40-45.  
16
- 17 **29.** Dearnaley DP, Hall E, Lawrence D, Huddart RA, Eeles R, Nutting CM, Gadd J,  
18 Warrington A, Bidmead M, Horwich A. Phase III pilot study of dose escalation using  
19 conformal radiotherapy in prostate cancer: PSA control and side effects. *Br J Cancer*.  
20 Feb 14 2005;92(3):488-498.  
21
- 22 **30.** Dearnaley DP, Khoo VS, Norman AR, Meyer L, Nahum A, Tait D, Yarnold J, Horwich  
23 A. Comparison of radiation side-effects of conformal and conventional radiotherapy in  
24 prostate cancer: a randomised trial. *Lancet*. Jan 23 1999;353(9149):267-272.  
25
- 26 **31.** Dearnaley DP, Sydes MR, Graham JD, Aird EG, Bottomley D, Cowan RA, Huddart  
27 RA, Jose CC, Matthews JH, Millar J, Moore AR, Morgan RC, et al. Escalated-dose  
28 versus standard-dose conformal radiotherapy in prostate cancer: first results from the  
29 MRC RT01 randomised controlled trial. *Lancet Oncol*. Jun 2007;8(6):475-487.  
30
- 31 **32.** Dearnaley DP, Sydes MR, Langley RE, Graham JD, Huddart RA, Syndikus I,  
32 Matthews JH, Scrase CD, Jose CC, Logue J, Stephens RJ. The early toxicity of  
33 escalated versus standard dose conformal radiotherapy with neo-adjuvant androgen  
34 suppression for patients with localised prostate cancer: results from the MRC RT01  
35 trial (ISRCTN47772397). *Radiother Oncol*. Apr 2007;83(1):31-41.  
36
- 37 **33.** Donnelly B, Saliken J, Brasher P, Ernst D, Lau H, Rewcastle J, Trpkov KA.  
38 Randomized Trial of External Beam Radiotherapy Versus Cryoablation in Patients  
39 with Localized Prostate Cancer. The American Urological Association Annual  
40 Meeting. Abstract 1141. 2007.  
41
- 42 **34.** Gravens PH, Nielsen KT, Gasser TC, Corle DK, Madsen PO. Radical  
43 prostatectomy versus expectant primary treatment in stages I and II prostatic cancer.  
44 A fifteen-year follow-up. *Urology*. Dec 1990;36(6):493-498.  
45
- 46 **35.** Koper PC, Jansen P, van Putten W, van Os M, Wijnmaalen AJ, Lebesque JV,  
47 Levendag PC. Gastro-intestinal and genito-urinary morbidity after 3D conformal  
48 radiotherapy of prostate cancer: observations of a randomized trial. *Radiother Oncol*.  
49 Oct 2004;73(1):1-9.  
50
- 51 **36.** Koper PC, Stroom JC, van Putten WL, Korevaar GA, Heijmen BJ, Wijnmaalen A,  
52 Jansen PP, Hanssens PE, Griep C, Krol AD, Samson MJ, Levendag PC. Acute  
53 morbidity reduction using 3DCRT for prostate carcinoma: a randomized study. *Int J  
54 Radiat Oncol Biol Phys*. Mar 1 1999;43(4):727-734.  
55
- 56 **37.** Lukka H, Hayter C, Julian JA, Warde P, Morris WJ, Gospodarowicz M, Levine M,  
57 Sathya J, Choo R, Prichard H, Brundage M, Kwan W. Randomized trial comparing  
58  
59  
60

- 1  
2  
3 two fractionation schedules for patients with localized prostate cancer. *J Clin Oncol*.  
4 Sep 1 2005;23(25):6132-6138.  
5  
6 **38.** Paulson DF, Lin GH, Hinshaw W, Stephani S. Radical surgery versus radiotherapy  
7 for adenocarcinoma of the prostate. *J Urol*. Sep 1982;128(3):502-504.  
8  
9 **39.** Peeters ST, Heemsbergen WD, Koper PC, van Putten WL, Slot A, Dielwart MF,  
10 Bonfrer JM, Incrocci L, Lebesque JV. Dose-response in radiotherapy for localized  
11 prostate cancer: results of the Dutch multicenter randomized phase III trial comparing  
12 68 Gy of radiotherapy with 78 Gy. *J Clin Oncol*. May 1 2006;24(13):1990-1996.  
13  
14 **40.** Pollack A, Hanlon AL, Horwitz EM, Feigenberg SJ, Konski AA, Movsas B, Greenberg  
15 RE, Uzzo RG, Ma CM, McNeeley SW, Buyyounouski MK, Price RA, Jr. Dosimetry  
16 and preliminary acute toxicity in the first 100 men treated for prostate cancer on a  
17 randomized hypofractionation dose escalation trial. *Int J Radiat Oncol Biol Phys*. Feb  
18 1 2006;64(2):518-526.  
19  
20 **41.** Pollack A, Zagars GK, Starkschall G, Antolak JA, Lee JJ, Huang E, von Eschenbach  
21 AC, Kuban DA, Rosen I. Prostate cancer radiation dose response: results of the M. D.  
22 Anderson phase III randomized trial. *Int J Radiat Oncol Biol Phys*. Aug 1  
23 2002;53(5):1097-1105.  
24  
25 **42.** Steineck G, Helgesen F, Adolfsson J, Dickman PW, Johansson JE, Norlen BJ,  
26 Holmberg L. Quality of life after radical prostatectomy or watchful waiting. *N Engl J*  
27 *Med*. Sep 12 2002;347(11):790-796.  
28  
29 **43.** Storey MR, Pollack A, Zagars G, Smith L, Antolak J, Rosen I. Complications from  
30 radiotherapy dose escalation in prostate cancer: preliminary results of a randomized  
31 trial. *Int J Radiat Oncol Biol Phys*. Oct 1 2000;48(3):635-642.  
32  
33 **44.** Tait DM, Nahum AE, Meyer LC, Law M, Dearnaley DP, Horwich A, Mayles WP,  
34 Yarnold JR. Acute toxicity in pelvic radiotherapy; a randomised trial of conformal  
35 versus conventional treatment. *Radiother Oncol*. Feb 1997;42(2):121-136.  
36  
37 **45.** Yeoh EE, Fraser RJ, McGowan RE, Botten RJ, Di Matteo AC, Roos DE, Penniment  
38 MG, Borg MF. Evidence for efficacy without increased toxicity of hypofractionated  
39 radiotherapy for prostate carcinoma: early results of a Phase III randomized trial. *Int J*  
40 *Radiat Oncol Biol Phys*. Mar 15 2003;55(4):943-955.  
41  
42 **46.** Al-Mamgani A, van Putten WL, Heemsbergen WD, van Leenders GJ, Slot A, Dielwart  
43 MF, Incrocci L, Lebesque JV. Update of Dutch multicenter dose-escalation trial of  
44 radiotherapy for localized prostate cancer. *Int J Radiat Oncol Biol Phys*. Nov 15  
45 2008;72(4):980-988.  
46  
47 **47.** Al-Mamgani A, van Putten WL, van der Wielen GJ, Levendag PC, Incrocci L. Dose  
48 escalation and quality of life in patients with localized prostate cancer treated with  
49 radiotherapy: long-term results of the Dutch randomized dose-escalation trial (CKTO  
50 96-10 trial). *Int J Radiat Oncol Biol Phys*. Mar 15 2011;79(4):1004-1012.  
51  
52 **48.** Arcangeli G, Fowler J, Gomellini S, Arcangeli S, Saracino B, Petrongari MG, Benassi  
53 M, Strigari L. Acute and late toxicity in a randomized trial of conventional versus  
54 hypofractionated three-dimensional conformal radiotherapy for prostate cancer. *Int J*  
55 *Radiat Oncol Biol Phys*. Mar 15 2011;79(4):1013-1021.  
56  
57  
58  
59  
60



- 1  
2  
3  
4  
5  
6  
7  
8  
9  
10  
11  
12  
13  
14  
15  
16  
17  
18  
19  
20  
21  
22  
23  
24  
25  
26  
27  
28  
29  
30  
31  
32  
33  
34  
35  
36  
37  
38  
39  
40  
41  
42  
43  
44  
45  
46  
47  
48  
49  
50  
51  
52  
53  
54  
55  
56  
57  
58  
59  
60
49. Arcangeli G, Saracino B, Gomellini S, Petrongari MG, Arcangeli S, Sentinelli S, Marzi S, Landoni V, Fowler J, Strigari L. A prospective phase III randomized trial of hypofractionation versus conventional fractionation in patients with high-risk prostate cancer. *Int J Radiat Oncol Biol Phys*. Sep 1 2010;78(1):11-18.
50. Beckendorf V, Guerif S, Le Prise E, Cosset JM, Bougnoux A, Chauvet B, Salem N, Chapet O, Bourdain S, Bachaud JM, Maingon P, Hannoun-Levi JM, et al. 70 Gy versus 80 Gy in localized prostate cancer: 5-year results of GETUG 06 randomized trial. *Int J Radiat Oncol Biol Phys*. Jul 15 2011;80(4):1056-1063.
51. Beckendorf V, Guerif S, Le Prise E, Cosset JM, Lefloch O, Chauvet B, Salem N, Chapet O, Bourdin S, Bachaud JM, Maingon P, Lagrange JL, et al. The GETUG 70 Gy vs. 80 Gy randomized trial for localized prostate cancer: feasibility and acute toxicity. *Int J Radiat Oncol Biol Phys*. Nov 15 2004;60(4):1056-1065.
52. Bill-Axelson A, Holmberg L, Filen F, Ruutu M, Garmo H, Busch C, Nordling S, Haggman M, Andersson SO, Bratell S, Spangberg A, Palmgren J, et al. Radical prostatectomy versus watchful waiting in localized prostate cancer: the Scandinavian prostate cancer group-4 randomized trial. *J Natl Cancer Inst*. Aug 20 2008;100(16):1144-1154.
53. Bill-Axelson A, Holmberg L, Ruutu M, Garmo H, Stark JR, Busch C, Nordling S, Haggman M, Andersson SO, Bratell S, Spangberg A, Palmgren J, et al. Radical prostatectomy versus watchful waiting in early prostate cancer. *N Engl J Med*. May 5 2011;364(18):1708-1717.
54. Dearnaley D, Syndikus I, Sumo G, Bidmead M, Bloomfield D, Clark C, Gao A, Hassan S, Horwich A, Huddart R, Khoo V, Kirkbride P, et al. Conventional versus hypofractionated high-dose intensity-modulated radiotherapy for prostate cancer: preliminary safety results from the CHHiP randomised controlled trial. *Lancet Oncol*. Jan 2012;13(1):43-54.
55. Donnelly BJ, Saliken JC, Brasher PM, Ernst SD, Rewcastle JC, Lau H, Robinson J, Trpkov K. A randomized trial of external beam radiotherapy versus cryoablation in patients with localized prostate cancer. *Cancer*. Jan 15 2010;116(2):323-330.
56. Giberti C, Chiono L, Gallo F, Schenone M, Gastaldi E. Radical retropubic prostatectomy versus brachytherapy for low-risk prostatic cancer: a prospective study. *World J Urol*. Oct 2009;27(5):607-612.
57. Heemsbergen WD, Hoogeman MS, Witte MG, Peeters ST, Incrocci L, Lebesque JV. Increased risk of biochemical and clinical failure for prostate patients with a large rectum at radiotherapy planning: results from the Dutch trial of 68 GY versus 78 Gy. *Int J Radiat Oncol Biol Phys*. Apr 1 2007;67(5):1418-1424.
58. Johansson E, Bill-Axelson A, Holmberg L, Onelov E, Johansson JE, Steineck G. Time, symptom burden, androgen deprivation, and self-assessed quality of life after radical prostatectomy or watchful waiting: the Randomized Scandinavian Prostate Cancer Group Study Number 4 (SPCG-4) clinical trial. *Eur Urol*. Feb 2009;55(2):422-430.
59. Johansson E, Steineck G, Holmberg L, Johansson JE, Nyberg T, Ruutu M, Bill-Axelson A. Long-term quality-of-life outcomes after radical prostatectomy or watchful waiting: the Scandinavian Prostate Cancer Group-4 randomised trial. *Lancet Oncol*. Sep 2011;12(9):891-899.

- 1  
2  
3  
4  
5  
6  
7  
8  
9  
10  
11  
12  
13  
14  
15  
16  
17  
18  
19  
20  
21  
22  
23  
24  
25  
26  
27  
28  
29  
30  
31  
32  
33  
34  
35  
36  
37  
38  
39  
40  
41  
42  
43  
44  
45  
46  
47  
48  
49  
50  
51  
52  
53  
54  
55  
56  
57  
58  
59  
60
60. Kuban DA, Levy LB, Cheung MR, Lee AK, Choi S, Frank S, Pollack A. Long-term failure patterns and survival in a randomized dose-escalation trial for prostate cancer. Who dies of disease? *Int J Radiat Oncol Biol Phys.* Apr 1 2011;79(5):1310-1317.
61. Kuban DA, Tucker SL, Dong L, Starkschall G, Huang EH, Cheung MR, Lee AK, Pollack A. Long-term results of the M. D. Anderson randomized dose-escalation trial for prostate cancer. *Int J Radiat Oncol Biol Phys.* Jan 1 2008;70(1):67-74.
62. Marzi S, Saracino B, Petrongari MG, Arcangeli S, Gomellini S, Arcangeli G, Benassi M, Landoni V. Modeling of alpha/beta for late rectal toxicity from a randomized phase II study: conventional versus hypofractionated scheme for localized prostate cancer. *J Exp Clin Cancer Res.* 2009;28:117.
63. Norkus D, Miller A, Kurtinaitis J, Haverkamp U, Popov S, Prott FJ, Valuckas KP. A randomized trial comparing hypofractionated and conventionally fractionated three-dimensional external-beam radiotherapy for localized prostate adenocarcinoma : a report on acute toxicity. *Strahlenther Onkol.* Nov 2009;185(11):715-721.
64. Norkus D, Miller A, Plieskiene A, Janulionis E, Valuckas KP. A randomized trial comparing hypofractionated and conventionally fractionated three-dimensional conformal external-beam radiotherapy for localized prostate adenocarcinoma: a report on the first-year biochemical response. *Medicina (Kaunas).* 2009;45(6):469-475.
65. Peeters ST, Heemsbergen WD, van Putten WL, Slot A, Tabak H, Mens JW, Lebesque JV, Koper PC. Acute and late complications after radiotherapy for prostate cancer: results of a multicenter randomized trial comparing 68 Gy to 78 Gy. *Int J Radiat Oncol Biol Phys.* Mar 15 2005;61(4):1019-1034.
66. Peeters ST, Lebesque JV, Heemsbergen WD, van Putten WL, Slot A, Dielwart MF, Koper PC. Localized volume effects for late rectal and anal toxicity after radiotherapy for prostate cancer. *Int J Radiat Oncol Biol Phys.* Mar 15 2006;64(4):1151-1161.
67. Robinson JW, Donnelly BJ, Siever JE, Saliken JC, Ernst SD, Rewcastle JC, Trpkov K, Lau H, Scott C, Thomas B. A randomized trial of external beam radiotherapy versus cryoablation in patients with localized prostate cancer: quality of life outcomes. *Cancer.* Oct 15 2009;115(20):4695-4704.
68. Syndikus I, Morgan RC, Sydes MR, Graham JD, Dearnaley DP. Late gastrointestinal toxicity after dose-escalated conformal radiotherapy for early prostate cancer: results from the UK Medical Research Council RT01 trial (ISRCTN47772397). *Int J Radiat Oncol Biol Phys.* Jul 1 2010;77(3):773-783.
69. van der Wielen GJ, Hoogeman MS, Dohle GR, van Putten WL, Incrocci L. Dose-volume parameters of the corpora cavernosa do not correlate with erectile dysfunction after external beam radiotherapy for prostate cancer: results from a dose-escalation trial. *Int J Radiat Oncol Biol Phys.* Jul 1 2008;71(3):795-800.
70. Wilt TJ, Brawer MK, Jones KM, Barry MJ, Aronson WJ, Fox S, Gingrich JR, Wei JT, Gilhooly P, Grob BM, Nsouli I, Iyer P, et al. Radical prostatectomy versus observation for localized prostate cancer. *N Engl J Med.* Jul 19 2012;367(3):203-213.
71. Yeoh EE, Botten RJ, Butters J, Di Matteo AC, Holloway RH, Fowler J. Hypofractionated versus conventionally fractionated radiotherapy for prostate



- carcinoma: final results of phase III randomized trial. *Int J Radiat Oncol Biol Phys*. Dec 1 2011;81(5):1271-1278.
72. Yeoh EE, Holloway RH, Fraser RJ, Botten RJ, Di Matteo AC, Butters J, Weerasinghe S, Abeysinghe P. Hypofractionated versus conventionally fractionated radiation therapy for prostate carcinoma: updated results of a phase III randomized trial. *Int J Radiat Oncol Biol Phys*. Nov 15 2006;66(4):1072-1083.
73. Yeoh EK, Holloway RH, Fraser RJ, Botten R, Di Matteo A, Moore JW, Schoeman MN, Bartholomeusz DL. Anorectal function after three- versus two-dimensional radiation therapy for carcinoma of the prostate. *Int J Radiat Oncol Biol Phys*. Jan 1 2009;73(1):46-52.
74. Zietman AL, Bae K, Slater JD, Shipley WU, Efstathiou JA, Coen JJ, Bush DA, Lunt M, Spiegel DY, Skowronski R, Jabola BR, Rossi CJ. Randomized trial comparing conventional-dose with high-dose conformal radiation therapy in early-stage adenocarcinoma of the prostate: long-term results from proton radiation oncology group/american college of radiology 95-09. *J Clin Oncol*. Mar 1 2010;28(7):1106-1111.
75. Zietman AL, DeSilvio ML, Slater JD, Rossi CJ, Jr., Miller DW, Adams JA, Shipley WU. Comparison of conventional-dose vs high-dose conformal radiation therapy in clinically localized adenocarcinoma of the prostate: a randomized controlled trial. *JAMA*. Sep 14 2005;294(10):1233-1239.
76. Widmark A. Prospective Randomized Trial Comparing External Beam Radiotherapy versus Watchful Waiting in Early Prostate Cancer (T1b-T2, pN0, Grade 1-2, M0). *2011 annual meeting of the American Society for Therapeutic Radiology And Oncology, ASTRO*. <http://www.oncolink.org/conferences/article.cfm?id=2171&ss=350>. 2011.
77. Fransson P, Damber JE, Tomic R, Modig H, Nyberg G, Widmark A. Quality of life and symptoms in a randomized trial of radiotherapy versus deferred treatment of localized prostate carcinoma. *Cancer*. Dec 15 2001;92(12):3111-3119.
78. Fransson P, Damber JE, Widmark A. Health-related quality of life 10 years after external beam radiotherapy or watchful waiting in patients with localized prostate cancer. *Scand J Urol Nephrol*. 2009;43(2):119-126.
79. Bannuru RR, Dvorak T, Obadan N, Yu WW, Patel K, Chung M, Ip S. Comparative evaluation of radiation treatments for clinically localized prostate cancer: an updated systematic review. *Ann Intern Med*. Aug 2 2011;155(3):171-178.
80. Hegarty J, Beirne PV, Walsh E, Comber H, Fitzgerald T, Wallace Kazer M. Radical prostatectomy versus watchful waiting for prostate cancer. *Cochrane Database Syst Rev*. 2010;11:CD006590.
81. Hummel S, Simpson EL, Hemingway P, Stevenson MD, Rees A. Intensity-modulated radiotherapy for the treatment of prostate cancer: a systematic review and economic evaluation. *Health Technol Assess*. Oct 2010;14(47):1-108, iii-iv.
82. Koukourakis G, Kelekis N, Armonis V, Kouloulis V. Brachytherapy for prostate cancer: a systematic review. *Adv Urol*. 2009:327945.

- 1  
2  
3 **83.** Morris DE, Emami B, Mauch PM, Konski AA, Tao ML, Ng AK, Klein EA, Mohideen N, Hurwitz MD, Fraas BA, Roach M, 3rd, Gore EM, et al. Evidence-based review of three-dimensional conformal radiotherapy for localized prostate cancer: an ASTRO outcomes initiative. *Int J Radiat Oncol Biol Phys*. May 1 2005;62(1):3-19.
- 4  
5  
6  
7  
8 **84.** Olsen DR, Bruland OS, Frykholm G, Norderhaug IN. Proton therapy - a systematic review of clinical effectiveness. *Radiother Oncol*. May 2007;83(2):123-132.
- 9  
10  
11 **85.** Pasquier D, Ballereau C. Adjuvant and salvage radiotherapy after prostatectomy for prostate cancer: a literature review. *Int J Radiat Oncol Biol Phys*. Nov 15 2008;72(4):972-979.
- 12  
13  
14  
15 **86.** Peinemann F, Grouven U, Bartel C, Sauerland S, Borchers H, Pinkawa M, Heidenreich A, Lange S. Permanent interstitial low-dose-rate brachytherapy for patients with localised prostate cancer: a systematic review of randomised and nonrandomised controlled clinical trials. *Eur Urol*. Nov 2011;60(5):881-893.
- 16  
17  
18  
19  
20 **87.** Peinemann F, Grouven U, Hemkens LG, Bartel C, Borchers H, Pinkawa M, Heidenreich A, Sauerland S. Low-dose rate brachytherapy for men with localized prostate cancer. *Cochrane Database Syst Rev*. 2011(7):CD008871.
- 21  
22  
23  
24 **88.** Pieters BR, de Back DZ, Koning CC, Zwinderman AH. Comparison of three radiotherapy modalities on biochemical control and overall survival for the treatment of prostate cancer: a systematic review. *Radiother Oncol*. Nov 2009;93(2):168-173.
- 25  
26  
27  
28 **89.** Shelley M, Wilt TJ, Coles B, Mason MD. Cryotherapy for localised prostate cancer. *Cochrane Database Syst Rev*. 2007(3):CD005010.
- 29  
30  
31 **90.** Staffurth J. A review of the clinical evidence for intensity-modulated radiotherapy. *Clin Oncol (R Coll Radiol)*. Oct 2010;22(8):643-657.
- 32  
33  
34 **91.** van Tol-Geerdink JJ, Stalmeier PF, Pasker-de Jong PC, Huizenga H, van Lin EN, Schimmel EC, Leer JW, van Daal WA. Systematic review of the effect of radiation dose on tumor control and morbidity in the treatment of prostate cancer by 3D-CRT. *Int J Radiat Oncol Biol Phys*. Feb 1 2006;64(2):534-543.
- 35  
36  
37  
38  
39 **92.** Viani GA, da Silva LG, Stefano EJ. High-dose conformal radiotherapy reduces prostate cancer-specific mortality: results of a meta-analysis. *Int J Radiat Oncol Biol Phys*. Aug 1 2012;83(5):e619-625.
- 40  
41  
42  
43 **93.** Viani GA, Stefano EJ, Afonso SL. Higher-than-conventional radiation doses in localized prostate cancer treatment: a meta-analysis of randomized, controlled trials. *Int J Radiat Oncol Biol Phys*. Aug 1 2009;74(5):1405-1418.
- 44  
45  
46  
47 **94.** Wilt TJ, MacDonald R, Rutks I, Shamliyan TA, Taylor BC, Kane RL. Systematic review: comparative effectiveness and harms of treatments for clinically localized prostate cancer. *Ann Intern Med*. Mar 18 2008;148(6):435-448.
- 48  
49  
50  
51 **95.** Sajid S, Kotwal AA, Dale W. Interventions to improve decision making and reduce racial and ethnic disparities in the management of prostate cancer: a systematic review. *J Gen Intern Med*. Aug 2012;27(8):1068-1078.
- 52  
53  
54  
55 **96.** Abdollah F, Schmitges J, Sun M, Jeldres C, Tian Z, Briganti A, Shariat SF, Perrotte P, Montorsi F, Karakiewicz PI. Comparison of mortality outcomes after radical
- 56  
57  
58  
59  
60

1  
2  
3 prostatectomy versus radiotherapy in patients with localized prostate cancer: a  
4 population-based analysis. *Int J Urol*. Sep 2012;19(9):836-844; author reply 844-835.  
5

- 6 **97.** Boorjian SA, Karnes RJ, Viterbo R, Rangel LJ, Bergstralh EJ, Horwitz EM, Blute ML,  
7 Buyyounouski MK. Long-term survival after radical prostatectomy versus external-  
8 beam radiotherapy for patients with high-risk prostate cancer. *Cancer*. Jul 1  
9 2011;117(13):2883-2891.  
10  
11 **98.** Cooperberg MR, Vickers AJ, Broering JM, Carroll PR. Comparative risk-adjusted  
12 mortality outcomes after primary surgery, radiotherapy, or androgen-deprivation  
13 therapy for localized prostate cancer. *Cancer*. Nov 15 2010;116(22):5226-5234.  
14  
15 **99.** Zelefsky MJ, Eastham JA, Cronin AM, Fuks Z, Zhang Z, Yamada Y, Vickers A,  
16 Scardino PT. Metastasis after radical prostatectomy or external beam radiotherapy  
17 for patients with clinically localized prostate cancer: a comparison of clinical cohorts  
18 adjusted for case mix. *J Clin Oncol*. Mar 20 2010;28(9):1508-1513.  
19  
20  
21  
22  
23  
24  
25  
26  
27  
28  
29  
30  
31  
32  
33  
34  
35  
36  
37  
38  
39  
40  
41  
42  
43  
44  
45  
46  
47  
48  
49  
50  
51  
52  
53  
54  
55  
56  
57  
58  
59  
60

**Appendix 1.** Full search strategy for Medline made on 12 Sep 2012

|    |                                                                                                                             |         |
|----|-----------------------------------------------------------------------------------------------------------------------------|---------|
| 1  | "watchful wait\$.ti,ab                                                                                                      | 1408    |
| 2  | (watch\$ adj2 wait\$.ti,ab                                                                                                  | 1795    |
| 3  | "observation".ti,ab                                                                                                         | 201605  |
| 4  | "watchful surveillance".ti,ab                                                                                               | 3       |
| 5  | "watchful monitoring".ti,ab                                                                                                 | 14      |
| 6  | "active surveillance".ti,ab                                                                                                 | 2609    |
| 7  | "active monitoring".ti,ab                                                                                                   | 177     |
| 8  | "expectant manag\$.ti,ab                                                                                                    | 1501    |
| 9  | "expectant monitoring".ti,ab                                                                                                | 18      |
| 10 | "expectant surveillance".ti,ab                                                                                              | 3       |
| 11 | "deferred treatment\$.ti,ab                                                                                                 | 174     |
| 12 | "deferred therap\$.ti,ab                                                                                                    | 53      |
| 13 | "delayed treatment\$.ti,ab                                                                                                  | 1752    |
| 14 | "delayed therap\$.ti,ab                                                                                                     | 264     |
| 15 | "conservative monitoring".ti,ab                                                                                             | 10      |
| 16 | 1 OR 2 OR 3 OR 4 OR 5 OR 6 OR 7 OR 8 OR 9 OR 10 OR 11 OR 12<br>OR 13 OR 14 OR 15                                            | 209461  |
| 17 | exp PROSTATIC NEOPLASMS/                                                                                                    | 83203   |
| 18 | PROSTATIC INTRAEPITHELIAL NEOPLASIA/                                                                                        | 1124    |
| 19 | pin.ti,ab                                                                                                                   | 9241    |
| 20 | ((prostat\$ adj3 (cancer\$ OR carcinoma\$ OR malignan\$ OR tumo?r\$ OR<br>neoplas\$ OR intraepithelial\$ OR adeno\$)).ti,ab | 85456   |
| 21 | 17 OR 18 OR 19 OR 20                                                                                                        | 109867  |
| 22 | RANDOMIZED CONTROLLED TRIALS AS TOPIC/                                                                                      | 82900   |
| 23 | RANDOMIZED CONTROLLED TRIAL/                                                                                                | 336590  |
| 24 | RANDOM ALLOCATION/                                                                                                          | 75700   |
| 25 | DOUBLE BLIND METHOD/                                                                                                        | 116906  |
| 26 | SINGLE BLIND METHOD/                                                                                                        | 16674   |
| 27 | CLINICAL TRIAL/                                                                                                             | 473817  |
| 28 | "clinical trial, phase i".pt                                                                                                | 12527   |
| 29 | "clinical trial, phase ii".pt                                                                                               | 20003   |
| 30 | "clinical trial, phase iii".pt                                                                                              | 7335    |
| 31 | "clinical trial, phase iv".pt                                                                                               | 739     |
| 32 | "controlled clinical trial".pt                                                                                              | 85134   |
| 33 | "randomized controlled trial".pt                                                                                            | 336590  |
| 34 | "multicenter study".pt                                                                                                      | 149366  |
| 35 | "clinical trial".pt                                                                                                         | 473817  |
| 36 | exp CLINICAL TRIALS AS TOPIC/                                                                                               | 260613  |
| 37 | 22 OR 23 OR 24 OR 25 OR 26 OR 27 OR 28 OR 29 OR 30 OR 31 OR<br>32 OR 33 OR 34 OR 35 OR 36                                   | 933873  |
| 38 | (clinical ADJ trial\$.ti,ab                                                                                                 | 185348  |
| 39 | ((singl\$ OR doubl\$ OR treb\$ OR tripl\$) AND (blind\$3 OR mask\$3)).ti,ab                                                 | 129000  |
| 40 | PLACEBOS/                                                                                                                   | 31302   |
| 41 | placebo\$.ti,ab                                                                                                             | 144213  |
| 42 | "randomly allocated".ti,ab                                                                                                  | 14778   |
| 43 | (allocated adj2 random\$.ti,ab                                                                                              | 17183   |
| 44 | 38 OR 39 OR 40 OR 41 OR 42 OR 43                                                                                            | 383691  |
| 45 | 37 OR 44                                                                                                                    | 1064978 |
| 46 | (case AND report).ti,ab                                                                                                     | 372325  |
| 47 | LETTER/                                                                                                                     | 776512  |

|    |    |                                                           |
|----|----|-----------------------------------------------------------|
| 1  |    |                                                           |
| 2  |    |                                                           |
| 3  | 48 | HISTORICAL ARTICLE/                                       |
| 4  | 49 | 46 OR 47 OR 48                                            |
| 5  | 50 | 45 NOT 49                                                 |
| 6  | 51 | CRYOTHERAPY/                                              |
| 7  | 52 | CRYOSURGERY/                                              |
| 8  | 53 | HYPOTHERMIA, INDUCED/                                     |
| 9  | 54 | cryoablat\$.ti,ab                                         |
| 10 | 55 | (cryo\$ ADJ ablat\$.ti,ab                                 |
| 11 | 56 | cryotreatment\$.ti,ab                                     |
| 12 | 57 | cryotherap\$.ti,ab                                        |
| 13 | 58 | cryotherm\$.ti,ab                                         |
| 14 | 59 | (cryo\$ ADJ surgery).ti,ab                                |
| 15 | 60 | 51 OR 52 OR 53 OR 54 OR 55 OR 56 OR 57 OR 58 OR 59        |
| 16 | 61 | ((cryo\$ OR hypotherm\$ OR freez\$) adj5 prostat\$.ti,ab  |
| 17 | 62 | 60 AND 21                                                 |
| 18 | 63 | 61 OR 62                                                  |
| 19 | 64 | PROSTATECTOMY/                                            |
| 20 | 65 | prostatectom\$.ti,ab                                      |
| 21 | 66 | resection.ti,ab                                           |
| 22 | 67 | 64 OR 65 OR 66                                            |
| 23 | 68 | (radical OR complete\$ OR total OR "en bloc").ti,ab       |
| 24 | 69 | 67 AND 68                                                 |
| 25 | 70 | (LRP OR TLRP OR RALRP OR RAP OR RRP OR RPP OR EERP).ti,ab |
| 26 | 71 | "heilbronn technique".ti,ab                               |
| 27 | 72 | 70 OR 71                                                  |
| 28 | 73 | 69 OR 72                                                  |
| 29 | 74 | exp RADIOTHERAPY/                                         |
| 30 | 75 | "radiation therap\$".ti,ab                                |
| 31 | 76 | "radiation treatment\$".ti,ab                             |
| 32 | 77 | radiotherap\$.ti,ab                                       |
| 33 | 78 | exp RADIOTHERAPY PLANNING/                                |
| 34 | 79 | irradiation.ti,ab                                         |
| 35 | 80 | RADIOTHERAPY, ADJUVANT/                                   |
| 36 | 81 | 74 OR 75 OR 76 OR 77 OR 78 OR 79 OR 80                    |
| 37 | 82 | META-ANALYSIS AS TOPIC/                                   |
| 38 | 83 | "meta analy\$".ti,ab                                      |
| 39 | 84 | metaanaly\$.ti,ab                                         |
| 40 | 85 | META-ANALYSIS/                                            |
| 41 | 86 | (systematic ADJ review\$1).ti,ab                          |
| 42 | 87 | (systematic ADJ overview\$1).ti,ab                        |
| 43 | 88 | exp REVIEW LITERATURE AS TOPIC/                           |
| 44 | 89 | 82 OR 83 OR 84 OR 85 OR 86 OR 87 OR 88                    |
| 45 | 90 | cochrane.ab                                               |
| 46 | 91 | embase.ab                                                 |
| 47 | 92 | (psychlit OR psyclit).ab                                  |
| 48 | 93 | (psychinfo OR psycinfo).ab                                |
| 49 | 94 | (cinahl OR cinhal).ab                                     |
| 50 | 95 | "science citation index".ab                               |
| 51 | 96 | bids.ab                                                   |
| 52 | 97 | cancerlit.ab                                              |
| 53 | 98 | 90 OR 91 OR 92 OR 93 OR 94 OR 95 OR 96 OR 97              |
| 54 | 99 | "reference list\$.ab                                      |
| 55 |    |                                                           |
| 56 |    |                                                           |
| 57 |    |                                                           |
| 58 |    |                                                           |
| 59 |    |                                                           |
| 60 |    |                                                           |

|    |     |                                                                                |
|----|-----|--------------------------------------------------------------------------------|
| 1  |     |                                                                                |
| 2  |     |                                                                                |
| 3  | 100 | bibliograph\$.ab                                                               |
| 4  | 101 | hand-search\$.ab                                                               |
| 5  | 102 | "relevant journals".ab                                                         |
| 6  | 103 | "manual search\$.ab                                                            |
| 7  | 104 | 99 OR 100 OR 101 OR 102 OR 103                                                 |
| 8  | 105 | "selection criteria".ab                                                        |
| 9  | 106 | "data extraction".ab                                                           |
| 10 | 107 | 105 OR 106                                                                     |
| 11 | 108 | REVIEW/                                                                        |
| 12 | 109 | 107 AND 108                                                                    |
| 13 | 110 | COMMENT/                                                                       |
| 14 | 111 | LETTER/                                                                        |
| 15 | 112 | EDITORIAL/                                                                     |
| 16 | 113 | ANIMAL/                                                                        |
| 17 | 114 | HUMAN/                                                                         |
| 18 | 115 | 113 NOT (113 AND 114)                                                          |
| 19 | 116 | 110 OR 111 OR 112 OR 115                                                       |
| 20 | 117 | 89 OR 98 OR 104 OR 109                                                         |
| 21 | 118 | 117 NOT 116                                                                    |
| 22 | 119 | ULTRASOUND, HIGH-INTENSITY FOCUSED, TRANSRECTAL/                               |
| 23 | 120 | ((high intensity adj2 ultraso\$)).ti,ab                                        |
| 24 | 121 | HIFU.ti,ab                                                                     |
| 25 | 122 | ((high intensity focused ultrasound)).ti,ab                                    |
| 26 | 123 | "focal therapy".ti,ab                                                          |
| 27 | 124 | 119 OR 120 OR 121 OR 122 OR 123                                                |
| 28 | 125 | 21 AND 50 AND 124                                                              |
| 29 | 126 | 16 AND 21 AND 50 AND 63 [Limit to: Publication Year 2005-Current]              |
| 30 | 127 | 16 AND 21 AND 50 AND 73 [Limit to: Publication Year 2005-Current]              |
| 31 | 128 | 16 AND 21 AND 50 AND 81 [Limit to: Publication Year 2005-Current]              |
| 32 | 129 | 50 AND 63 AND 81 [Limit to: Publication Year 2005-Current]                     |
| 33 | 130 | 50 AND 63 AND 73 [Limit to: Publication Year 2005-Current]                     |
| 34 | 131 | 21 AND 50 AND 73 AND 81 [Limit to: Publication Year 2005-Current]              |
| 35 | 132 | (21 AND 50 AND 81) NOT (128 OR 131) [Limit to: Publication Year 2005-Current]  |
| 36 | 133 | 16 AND 21 AND 63 AND 118 [Limit to: Publication Year 2005-Current]             |
| 37 | 134 | 16 AND 21 AND 73 AND 118 [Limit to: Publication Year 2005-Current]             |
| 38 | 135 | 16 AND 21 AND 81 AND 118 [Limit to: Publication Year 2005-Current]             |
| 39 | 136 | 63 AND 81 AND 118 [Limit to: Publication Year 2005-Current]                    |
| 40 | 137 | 63 AND 73 AND 118 [Limit to: Publication Year 2005-Current]                    |
| 41 | 138 | 21 AND 73 AND 81 AND 118 [Limit to: Publication Year 2005-Current]             |
| 42 | 139 | (21 AND 81 AND 118) NOT (135 OR 138) [Limit to: Publication Year 2005-Current] |
| 43 |     |                                                                                |
| 44 |     |                                                                                |
| 45 |     |                                                                                |
| 46 |     |                                                                                |
| 47 |     |                                                                                |
| 48 |     |                                                                                |
| 49 |     |                                                                                |
| 50 |     |                                                                                |
| 51 |     |                                                                                |
| 52 |     |                                                                                |
| 53 |     |                                                                                |
| 54 |     |                                                                                |
| 55 |     |                                                                                |
| 56 |     |                                                                                |
| 57 |     |                                                                                |
| 58 |     |                                                                                |
| 59 |     |                                                                                |
| 60 |     |                                                                                |

## Appendix 2. Characteristics of included studies

| Comparison                                                     | Trial title                                                       | Author, year                                                        | Country                    | Population                                                                                                                                                               | No. of men | Interventions and Comparisons                                                                                                                        | Outcomes                                                                                                                                                                          | Follow up         |
|----------------------------------------------------------------|-------------------------------------------------------------------|---------------------------------------------------------------------|----------------------------|--------------------------------------------------------------------------------------------------------------------------------------------------------------------------|------------|------------------------------------------------------------------------------------------------------------------------------------------------------|-----------------------------------------------------------------------------------------------------------------------------------------------------------------------------------|-------------------|
| Observational management v Prostatectomy (3 trials)            | Graversen 1990 (1 paper)                                          | Graversen 1990                                                      | USA                        | Dates of enrolment to study: Between May 1967 and March 1975; Setting: Multi-centre (15 participating hospitals); Age: All age; Disease status: stage I or II (T0 – T2). | 142        | 1. Watchful waiting (74 men)<br>2. Prostatectomy (68 men)                                                                                            | Overall survival.                                                                                                                                                                 | 15 years.         |
|                                                                | PIVOT trial (1 paper)                                             | Wilt 2012                                                           | USA                        | Dates of enrolment to study: Nov 1994 to Jan 2002; Setting: multicentre; Mean age: 67yr; Disease status: T1-T2NxM0.                                                      | 731        | 1. Observation (367 men)<br>2. Prostatectomy (364 men)                                                                                               | All cause mortality; Cancer caused mortality; Bone metastases; Urinary incontinence; Bowel dysfunction; Erectile dysfunction.                                                     | 10 years.         |
|                                                                | Scandinavian Prostate Cancer Group Study No 4 (SPCG-4) (6 papers) | Bill-Axelsson 2005, 2008, 2011; Johansson 2009, 2011 Steineck 2002; | Sweden, Finland, Iceland   | Dates of enrolment to study: Oct 1989 to Feb 1999; Setting: Multi-centre (14 participating hospitals); Age: Mean age 64.7; Disease status: T0d, T1, T2.                  | 695        | 1. Watchful waiting (348 men)<br>2. Prostatectomy (347 men)                                                                                          | Death due to prostate cancer; All-caused mortality; Distance metastasis; Local progression; overall distress from all bowel symptoms, overall distress from all urinary symptoms. | 8.2 - 12.8 years. |
| Observational management v Conformal LD radiotherapy (1 trial) | Widmark 2011 (1 paper)                                            | Widmark 2011                                                        | Sweden, Denmark and Norway | Dates of enrolment to study: Apr 1986 to Jan 1997; Setting: unknown; Age: up to 75; Disease status: T1b-T2, pN0, G1-G2, M0.                                              | 214        | 1. Watchful waiting (107 men)<br>2. 3D conformal radiotherapy, either 64 Gy in 32 fractions with 2cm margin, or 64-68 Gy with 1.5cm margin (107 men) | All-cause mortality, Prostate cancer mortality, Distant progression, Recurrence free survival, Clinical progression, Biochemical progression, Local progression.                  | 20 years.         |



|    |                |              |             |        |                               |     |                                 |                                |
|----|----------------|--------------|-------------|--------|-------------------------------|-----|---------------------------------|--------------------------------|
| 1  |                |              |             |        |                               |     |                                 |                                |
| 2  |                |              |             |        |                               |     |                                 |                                |
| 3  |                |              |             |        |                               |     |                                 |                                |
| 4  |                |              |             |        |                               |     |                                 |                                |
| 5  | Prostatectomy  | Akakura      | Akakura     | Japan  | Dates of enrolment to study:  | 95  | 1. Prostatectomy (46 men).2.    | Biochemical progression-free   |
| 6  | v Conventional | 2006(1       | 2006        |        | 1989 to 1993; Setting: Multi- |     | Conventional radiotherapy       | survival at 10 years; Clinical |
| 7  | radiotherapy   | paper)       |             |        | centre; Age: Mean 68.1, SD    |     | (49 men): Irradiation by linear | progression-free survival at   |
| 8  | (2 trials)     |              |             |        | 7.0 in surgery group; mean    |     | accelerator with a 40-50 Gy     | 10 years; Cause-specific       |
| 9  |                |              |             |        | 68.7, SD 6.6 in radiation     |     | beam to the whole pelvis        | survival at 10 years; Overall  |
| 10 |                |              |             |        | group; Disease status: T2b-   |     | followed by a 20 Gy boost to    | survival at 10 years; Adverse  |
| 11 |                |              |             |        | 3N0M0, no evidence of lymph   |     | the prostatic area for 6-7      | effects.                       |
| 12 |                |              |             |        | node metastasis.              |     | weeks fractionated five times   |                                |
| 13 |                |              |             |        |                               |     | per week. All men received      |                                |
| 14 |                |              |             |        |                               |     | an initial treatment with 8     |                                |
| 15 |                |              |             |        |                               |     | weeks of neoadjuvant            |                                |
| 16 |                |              |             |        |                               |     | endocrine therapy.              |                                |
| 17 |                |              |             |        |                               |     |                                 |                                |
| 18 |                |              |             |        |                               |     |                                 |                                |
| 19 |                |              |             |        |                               |     |                                 |                                |
| 20 | Cryotherapy v  | Canada trial | Donnelly    | Canada | Dates of enrolment to study:  | 244 | 1. Cryotherapy (122 men).       | Treatment Failure; 5 year      |
| 21 | Conventional   | (3 papers)   | 2007, 2010; |        | Dec 1997 to Feb 2003;         |     | 2. Conventional EBRT (122       | overall survival; Biopsy rate  |
| 22 | radiotherapy   | (2 trials)   | Robinson    |        | Setting: Tom Baker Cancer     |     | men): dose of 68 Gy given in    | at 36 months; Disease-         |
| 23 |                |              | 2009        |        | Center, Calgary, Canada;      |     | 2 Gy fractions daily, 5 days    | specific survival at 5 years;  |
| 24 |                |              |             |        | Age: Median 69.4, range       |     | per week, later increased to    | Genitourinary and              |
| 25 |                |              |             |        | 52.8-81.4 in CT group;        |     | 70 Gy and later 73.5 Gy.        | gastrointestinal adverse       |
| 26 |                |              |             |        | median 68.6, range 53.2-78.6  |     |                                 | effects; Quality of life.      |
| 27 |                |              |             |        | in EBRT group; Disease        |     |                                 |                                |
| 28 |                |              |             |        | status: T2 - T3.              |     |                                 |                                |
| 29 |                | Chin 2008    | Chin 2008   | Canada | Setting: London Health        | 64  | 1. Cryotherapy (33 men).        | Biochemical disease-free       |
| 30 |                | (1 paper)    |             |        | Sciences Centre, University   |     | 2. Conventional EBRT (31        | survival at 4 years; Overall   |
| 31 |                |              |             |        | of Western Ontario; Age:      |     | men): 66 Gy in 33 fractions.    | survival at 4 years; Disease   |
| 32 |                |              |             |        | Median age 70 in each group;  |     |                                 | specific survival at 4 years;  |
| 33 |                |              |             |        | Disease status: T2 - T3.      |     |                                 | Positive biopsy rate;          |
| 34 |                |              |             |        |                               |     |                                 | Gastrointestinal toxicity;     |
| 35 |                |              |             |        |                               |     |                                 | Genitourinary toxicity;        |
| 36 |                |              |             |        |                               |     |                                 | Hormonal adverse effects.      |
| 37 |                |              |             |        |                               |     |                                 |                                |
| 38 |                |              |             |        |                               |     |                                 |                                |
| 39 |                |              |             |        |                               |     |                                 |                                |
| 40 |                |              |             |        |                               |     |                                 |                                |
| 41 |                |              |             |        |                               |     |                                 |                                |
| 42 |                |              |             |        |                               |     |                                 |                                |
| 43 |                |              |             |        |                               |     |                                 |                                |
| 44 |                |              |             |        |                               |     |                                 |                                |
| 45 |                |              |             |        |                               |     |                                 |                                |
| 46 |                |              |             |        |                               |     |                                 |                                |
| 47 |                |              |             |        |                               |     |                                 |                                |
| 48 |                |              |             |        |                               |     |                                 |                                |
| 49 |                |              |             |        |                               |     |                                 |                                |



|                                                                                                    |                                                                                   |                                                                 |                             |             |                                                                                                                                                                                                                                           |     |                                                                                                                                                                                                                                    |                                                                                                                                                                                                                       |                                 |
|----------------------------------------------------------------------------------------------------|-----------------------------------------------------------------------------------|-----------------------------------------------------------------|-----------------------------|-------------|-------------------------------------------------------------------------------------------------------------------------------------------------------------------------------------------------------------------------------------------|-----|------------------------------------------------------------------------------------------------------------------------------------------------------------------------------------------------------------------------------------|-----------------------------------------------------------------------------------------------------------------------------------------------------------------------------------------------------------------------|---------------------------------|
| 1<br>2<br>3<br>4<br>5<br>6<br>7<br>8<br>9<br>10<br>11<br>12<br>13<br>14                            | Conventional radiotherapy v Conventional radiotherapy-hypofractionated (2 trials) | Yeoh trial (4 papers)                                           | Yeoh 2003, 2006, 2009, 2011 | Australia   | Dates of enrolment to study: July 1996 to Aug 2003; Setting: Department of Radiation Oncology and Gastroenterology, Royal Adelaide Hospital; Age: Median age 69 (44 ~ 82 yrs); Disease status: T1, T2, N0 M0.                             | 217 | 1. Conventional EBRT: 64 Gy in 32 fractions within 6.5 weeks (109 men).<br>2. Hypofractionated EBRT: 55 Gy in 20 fractions within 4 weeks (108 men).                                                                               | Gastrointestinal (GI) and genitourinary (GU) toxicity; overall survival rate; biochemical $\pm$ clinical relapse; biochemical $\pm$ clinical relapse-free survival; cancer-related mortality.                         | 5 years.                        |
| 15<br>16<br>17<br>18<br>19<br>20<br>21<br>22<br>23                                                 |                                                                                   | Lukka 2005 (1 paper)                                            | Lukka 2005                  | Canada      | Dates of enrolment to study: March 1995 – December 1998; Setting: 8 Ontario regional cancer centres and 8 additional Canadian centres; Age: Mean 70.3, range 53-84 in group 1; mean 70.0, range 53-84 in group 2; Disease status: T1, T2. | 936 | 1. Conventional EBRT (470 men): 66 Gy in 33 fractions over 45 days.<br>2. Hypofractionated EBRT (466 men): 52.5 Gy in 20 fractions over 28 days.                                                                                   | Composite of biochemical or clinical failure (BCF); local persistence of tumour on biopsy of the prostate at 2 years; overall survival; acute and late radiation-induced toxicity; prostate cancer-related mortality. | Median follow-up was 5.7 years. |
| 24<br>25<br>26<br>27<br>28<br>29<br>30<br>31<br>32                                                 | Conventional radiotherapy v Conformal LD radiotherapy (2 trials)                  | Koper trial (2 papers)                                          | Koper 1999, 2004            | Netherlands | Dates of enrolment to study: June 1994 to March 1996; Setting: Erasmus Medical Center/Daniel den Hoed Cancer Center; Mean age: group1: 70 (6.4); group 2: 69.5 (6.1); Disease status: T1-T4 N0M0.                                         | 266 | 1. Conventional radiotherapy (134 men);<br>2. Conformal radiotherapy (129 men). All men were treated to a dose of 66 Gy, using the same planning procedure, treatment technique, linear accelerator, and portal imaging procedure. | Gastrointestinal (GI) and genitourinary (GU) toxicity.                                                                                                                                                                | 2 years.                        |
| 33<br>34<br>35<br>36<br>37<br>38<br>39<br>40<br>41<br>42<br>43<br>44<br>45<br>46<br>47<br>48<br>49 |                                                                                   | Royal Marsden and Institute of Cancer Research study (2 papers) | Dearnaley 1999; Tait 1997   | UK          | Dates of enrolment to study: 1988 to 1995; Setting: Tertiary care, single centre; Median age (range): 69 (51-80) in group 1, 68 (50-83) in group 2; Disease status: T1-T4 N0M0.                                                           | 225 | 1. Conventional radiotherapy (111 men): 60 to 64 Gy in 2 Gy fractions.<br>2. Conformal radiotherapy (114 men): 60 to 64 Gy in 2 Gy fractions.                                                                                      | Overall survival; Biochemical progression free survival; Late GI toxicity; Late GU toxicity.                                                                                                                          | 2 - 5 years.                    |

|                                                                |                                                                  |                                   |                                                                                     |             |                                                                                                                                                                                            |     |                                                                                                                                                          |                                                                                                                                                                                                                                                                                                   |                  |
|----------------------------------------------------------------|------------------------------------------------------------------|-----------------------------------|-------------------------------------------------------------------------------------|-------------|--------------------------------------------------------------------------------------------------------------------------------------------------------------------------------------------|-----|----------------------------------------------------------------------------------------------------------------------------------------------------------|---------------------------------------------------------------------------------------------------------------------------------------------------------------------------------------------------------------------------------------------------------------------------------------------------|------------------|
| 1<br>2<br>3<br>4<br>5<br>6<br>7<br>8<br>9<br>10<br>11          | Conformal LD radiotherapy v Conformal HD radiotherapy (5 trials) | Dutch trial (7 papers)            | Al-Mamgani 2008, 2011; Heemsbergen 2007; Peeters 2005, 2006a,b; van der Wielen 2008 | Netherlands | Dates of enrolment to study: between June 1997 and February 2003; Setting: multi-center; Age: mean 68.6 and 68.8, range 50.3-82.9 and 48.7-83.6; Disease status: T1-T4.                    | 669 | 1. 3D conformal radiotherapy 68 Gy (331 men).<br>2. 3D conformal radiotherapy 78 Gy (333 men).                                                           | freedom from failure; biochemical progression free survival; clinical progression free survival; overall survival; late GI toxicity; late GU toxicity; prostate cancer related deaths.                                                                                                            | 2 - 7 years.     |
| 12<br>13<br>14<br>15<br>16<br>17<br>18                         | MRC RT01 pilot trial (1 paper)                                   | Dearnaley 2005                    |                                                                                     | UK          | Dates of enrolment to study: between Jul 1995 and Dec 1997; Setting: Royal Marsden NHS Trust and Institute of Cancer Research; Age: median 66 and 69; Disease status: T1b-T3b N0 M0.       | 127 | 1. Conformal radiotherapy, standard dose (64 men): 64 Gy in 2 Gy fractions.<br>2. Conformal radiotherapy, high dose (63 men): 74 Gy in 2 Gy fractions.   | Biochemical (PSA) failure; Local or metastatic failure; Hormone therapy restarted; acute GU toxicity; acute GI toxicity; late GU toxicity; late GI toxicity; prostate cancer caused deaths.                                                                                                       | 5 years.         |
| 19<br>20<br>21<br>22<br>23<br>24<br>25<br>26<br>27<br>28<br>29 | MRC RT01 (3 papers)                                              | Dearnaley 2007a,b; Syndikus 2010. |                                                                                     | UK          | Dates of enrolment to study: Jan 1998 to Dec 2002; Setting: multi-centre; Age: median 67 (IQR 63-71); Disease status: T1b-T3a N0 M0.                                                       | 843 | 1. Conformal radiotherapy, standard dose (421 men): 64 Gy in 2 Gy fractions.<br>2. Conformal radiotherapy, high dose (422 men): 74 Gy in 2 Gy fractions. | Biochemical-progression-free survival; 5-year overall survival; Progression-free survival; Freedom from local progression; Freedom from salvage androgen suppression; Metastases-free survival; Bowel dysfunction; Urinary or bladder dysfunction; Sexual dysfunction; prostate cancer mortality. | 5 years.         |
| 30<br>31<br>32<br>33<br>34<br>35                               | GETUG 06 Tial (2 papers)                                         | Beckendorf 2004, 2011             |                                                                                     | France      | Dates of enrolment to study: Sep 1999 to Feb 2002; Setting: Multicentre; Age: mean 67; Disease status: T1b-T3a, NOM0.                                                                      | 306 | 1. Conformal radiotherapy, standard dose (153 men): 70 Gy in 2 Gy fractions.<br>2. Conformal radiotherapy, high dose (153 men): 80 Gy in 2 Gy fractions. | Biochemical relapse alone; PSA and clinical relapse; Free from relapse; All cause death; Cancer cause death; RTOG rectal and urinary toxicity grade 2 and worse.                                                                                                                                  | 61 months.       |
| 36<br>37<br>38<br>39<br>40<br>41<br>42<br>43<br>44<br>45       | Zietman trial (2 papers)                                         | Zietman AL, 2005, 2010            |                                                                                     | USA         | Dates of enrolment to study: between Jan 1996 and Dec 1999; Setting: 2 US academic institutions; Age: 67 (45~91) in 70.2 Gy arm, 66 (47~78) in 79.2 Gy arm; Disease status: T1-T2, N0, Nx. | 393 | 1. External beam radiation 70.2 Gy (197 men);<br>2. External beam radiation 79.2 Gy (195 men).                                                           | Freedom from biochemical failure 5 yrs after treatment (measured by PSA level); Acute and late GU and GI morbidity, overall survival, prostate cancer-related mortality.                                                                                                                          | 5.5 - 8.9 years. |

|                                                                                   |                                                            |                                              |           |                                                                                                                                                                |     |                                                                                                                                                                                                                                                    |                                                                                                                                                                                                    |                                  |
|-----------------------------------------------------------------------------------|------------------------------------------------------------|----------------------------------------------|-----------|----------------------------------------------------------------------------------------------------------------------------------------------------------------|-----|----------------------------------------------------------------------------------------------------------------------------------------------------------------------------------------------------------------------------------------------------|----------------------------------------------------------------------------------------------------------------------------------------------------------------------------------------------------|----------------------------------|
| Conformal HD radiotherapy v Conformal LD radiotherapy-hypofractionated (4 trials) | Arcangeli 2010 (2 papers)                                  | Arcangeli 2010, 2011                         | Italy     | Dates of enrolment to study: Jan 2003 to Dec 2007; Setting: single centre; Mean age: 75 years; Disease status: no evidence of distant metastases.              | 168 | 1. hypofractionated (62 Gy/20 fractions/5 weeks, 4 fractions per week): 83 men.<br>2. conventional fractionation radiotherapy (80 Gy/40 fractions/8 weeks): 85 men.                                                                                | Acute and late GU and GI toxicity; biochemical failure; freedom from biochemical failure; distant metastasis rates; all cause mortality; cancer related mortality.                                 | 4 years.                         |
|                                                                                   | Marzi 2009 (1 paper)                                       | Marzi 2009                                   | Italy     | Dates of enrolment to study: March 2003 to June 2008; Setting: single centre; Age: all; Disease status: T1-T4.                                                 | 162 | 1. Conformal radiotherapy hypofractionated: 62 Gy in 20 fractions over 5 weeks (57 men);<br>2. Conformal radiotherapy: 80 Gy in 40 fractions over 8 weeks (57 men).                                                                                | Late rectal toxicity.                                                                                                                                                                              | Median followup was 30 months.   |
|                                                                                   | Norkus 2009 (2 papers)                                     | Norkus 2009 a,b                              | Lithuania | Dates of enrolment to study: 2004; Setting: single centre; Age: median 63 (range 53-75) in group 1, median 65 (range 50-78) in group 2; Disease status: T1-T3. | 91  | 1. Hypofractionated external beam radiotherapy: 57 Gy given as 13 fractions of 3 Gy plus 4 fractions of 4.5 Gy (47 men).<br>2. Conventionally fractionated external beam radiotherapy: 74 Gy given in 37 fractions of 2 Gy (44 men).               | Biochemical (PSA) response; acute gastrointestinal (GI) and genitourinary (GU) toxicity; overall survival; prostate cancer-related mortality.                                                      | 3 - 12 months.                   |
|                                                                                   | CHHiP trial (1 paper)                                      | Dearnaley 2012                               | UK        | Dates of enrolment to study: Oct 2002 to Aug 2006; Setting: multicentre; Age: median 67 - 68 (range 44-82); Disease status: T1b - T3a NOMO.                    | 457 | 1. Conventional fractionation: 74 Gy in 37 fractions at 2 Gy per fraction (153 men).<br>2. Hypofractionation: 60 Gy in 20 fractions at 3 Gy per fraction (153 men).<br>3. Hypofractionation: 57 Gy in 19 fractions at 3 Gy per fraction (151 men). | Acute bowel toxicity; Acute bladder toxicity; Late bowel toxicity; Late bladder toxicity; Sexual dysfunction.                                                                                      | 50.5 months.                     |
| Conventional radiotherapy v Conformal HD radiotherapy (1 trial)                   | M. D. Anderson randomized dose-escalation trial (4 papers) | Kuban 2008, 2011; Pollack 2002; Storey 2000. | USA       | Dates of enrolment to study: 1993 to 1998; Setting: M. D. Anderson Cancer Center, University of Texas; Median age 69 for each arm; Disease status: T1-T3 NOMO. | 305 | 1. Conventional radiotherapy (150 men): 70 Gy, given in daily 2 Gy fractions.<br>2. 3D conformal radiotherapy (151 men): 78 Gy, given in daily 2 Gy fractions.                                                                                     | freedom from biochemical or clinical failure; freedom from distant metastasis; overall survival; disease-specific survival; late GI toxicity; late GU toxicity; prostate cancer-related mortality. | Median follow-up of 5 - 8 years. |

LD: low dose; HD: high dose.

**Appendix 3.** Assessment of risk of bias for included randomized trials (please refer to [www.cochrane-handbook.org](http://www.cochrane-handbook.org) for instructions on how to complete the tables).

**Outcomes measured:**  
a - all cause mortality.  
b - cancer related mortality.  
c - gastrointestinal and genitourinary toxicity.

**Study ID: CHHiP trial**

| Risk of bias table for outcome c       |                                   |                                                                                                                                           |
|----------------------------------------|-----------------------------------|-------------------------------------------------------------------------------------------------------------------------------------------|
|                                        | Judgement (low/high/unclear risk) | Support for judgement                                                                                                                     |
| Random sequence generation             | Low risk                          | Computer-generated random permuted blocks were used                                                                                       |
| Allocation concealment                 | Low risk                          | Independent randomisation was via telephone to the ICR-CTSU.                                                                              |
| Blinding of participants and personnel | High risk                         | Treatment allocation was not masked and, because of the trial's size, assessors could not be blinded to toxicity or clinical assessments. |
| Blinding of outcome assessment         | High risk                         | Treatment allocation was not masked and, because of the trial's size, assessors could not be blinded to toxicity or clinical assessments. |
| Incomplete outcome data                | Low risk                          | Losses to follow-up are disclosed                                                                                                         |
| Selective reporting                    | Low risk                          | Pre-planned analyses.                                                                                                                     |
| Other bias                             | Low risk                          | No other sources of bias identified.                                                                                                      |

**Study ID: PIVOT trial**

| Risk of bias table for outcomes a, b   |                                   |                                                                                                                      |
|----------------------------------------|-----------------------------------|----------------------------------------------------------------------------------------------------------------------|
|                                        | Judgement (low/high/unclear risk) | Support for judgement                                                                                                |
| Random sequence generation             | Low risk                          | Randomization was stratified according to site and implemented by means of a central interactive telephone system    |
| Allocation concealment                 | Low risk                          | Protocol                                                                                                             |
| Blinding of participants and personnel | Low risk                          | Unmasked design, but we judge that lack of blinding is unlikely to affect mortality or biochemical/clinical relapse. |
| Blinding of outcome                    | Low risk                          | After randomization, a central pathologist reviewed the biopsy and radical-prostatectomy specimens, and a            |

|                                         |                                              |                                                                                                                   |
|-----------------------------------------|----------------------------------------------|-------------------------------------------------------------------------------------------------------------------|
| assessment                              |                                              | central laboratory measured PSA.                                                                                  |
| Incomplete outcome data                 | Low risk                                     | Losses to follow-up described and were low                                                                        |
| Selective reporting                     | Low risk                                     | Protocol                                                                                                          |
| Other bias                              | Low risk                                     | Not identified                                                                                                    |
| <b>Risk of bias table for outcome c</b> |                                              |                                                                                                                   |
|                                         | <b>Judgement</b> (low/<br>high/unclear risk) | <b>Support for judgement</b>                                                                                      |
| Random sequence generation              | Low risk                                     | Randomization was stratified according to site and implemented by means of a central interactive telephone system |
| Allocation concealment                  | Low risk                                     | Protocol                                                                                                          |
| Blinding of participants and personnel  | HIGH risk                                    | Lack of blinding is likely to pose conceptual risks to the toxicity assessment.                                   |
| Blinding of outcome assessment          | High risk                                    | Toxicity outcomes are patient-reported and therefore at high risk of bias.                                        |
| Incomplete outcome data                 | High risk                                    | Moderate losses to follow-up, 23% in each group.                                                                  |
| Selective reporting                     | Low risk                                     | Protocol                                                                                                          |
| Other bias                              | Low risk                                     | Not identified                                                                                                    |

**Study ID: GETUG 06 Tial**

|                                             |                                              |                                                                                                                      |
|---------------------------------------------|----------------------------------------------|----------------------------------------------------------------------------------------------------------------------|
| <b>Risk of bias table for outcomes a, b</b> |                                              |                                                                                                                      |
|                                             | <b>Judgement</b> (low/<br>high/unclear risk) | <b>Support for judgement</b>                                                                                         |
| Random sequence generation                  | Unclear risk                                 | Not stated                                                                                                           |
| Allocation concealment                      | Unclear risk                                 | Not stated                                                                                                           |
| Blinding of participants and personnel      | Low risk                                     | Unmasked design, but we judge that lack of blinding is unlikely to affect mortality or biochemical/clinical relapse. |
| Blinding of outcome assessment              | Low risk                                     | Unmasked design, but we judge that lack of blinding is unlikely to affect mortality or biochemical/clinical relapse. |
| Incomplete outcome data                     | Low risk                                     | Lost to follow-up described                                                                                          |
| Selective reporting                         | Unclear risk                                 | No protocol available                                                                                                |
| Other bias                                  | Low risk                                     | Not identified                                                                                                       |

1  
2  
3  
4  
5  
6  
7  
8  
9  
10  
11  
12  
13  
14  
15  
16  
17  
18  
19  
20  
21  
22  
23  
24  
25

| <b>Risk of bias table for outcome c</b> |                                              |                                                                                 |
|-----------------------------------------|----------------------------------------------|---------------------------------------------------------------------------------|
|                                         | <b>Judgement</b> (low/<br>high/unclear risk) | <b>Support for judgement</b>                                                    |
| Random sequence generation              | Unclear risk                                 | Not stated                                                                      |
| Allocation concealment                  | Unclear risk                                 | Not stated                                                                      |
| Blinding of participants and personnel  | HIGH risk                                    | Lack of blinding is likely to pose conceptual risks to the toxicity assessment. |
| Blinding of outcome assessment          | HIGH risk                                    | Lack of blinding is likely to pose conceptual risks to the toxicity assessment. |
| Incomplete outcome data                 | Low risk                                     | Lost to follow-up described                                                     |
| Selective reporting                     | Unclear risk                                 | No protocol available                                                           |
| Other bias                              | Low risk                                     | Not identified                                                                  |

26  
27  
28  
29  
30  
31  
32  
33  
34  
35  
36  
37  
38  
39  
40  
41  
42  
43  
44  
45  
46  
47  
48  
49  
50

**Study ID: Widmark 2011**

| <b>Risk of bias table for outcomes a, b</b> |                                              |                                                                                                                      |
|---------------------------------------------|----------------------------------------------|----------------------------------------------------------------------------------------------------------------------|
|                                             | <b>Judgement</b> (low/<br>high/unclear risk) | <b>Support for judgement</b>                                                                                         |
| Random sequence generation                  | Unclear                                      | No details available.                                                                                                |
| Allocation concealment                      | Unclear                                      | No details available.                                                                                                |
| Blinding of participants and personnel      | Low risk                                     | Unmasked design, but we judge that lack of blinding is unlikely to affect mortality or biochemical/clinical relapse. |
| Blinding of outcome assessment              | Low risk                                     | Unmasked design, but we judge that lack of blinding is unlikely to affect mortality or biochemical/clinical relapse. |
| Incomplete outcome data                     | Unclear                                      | No details available.                                                                                                |
| Selective reporting                         | Unclear                                      | No details available.                                                                                                |
| Other bias                                  | Unclear                                      | No details available.                                                                                                |

51  
52  
53  
54  
55  
56  
57  
58  
59  
60

**Study ID: Yeoh trial**

| <b>Risk of bias table for outcomes a, b</b> |                                              |                              |
|---------------------------------------------|----------------------------------------------|------------------------------|
|                                             | <b>Judgement</b> (low/<br>high/unclear risk) | <b>Support for judgement</b> |

|                                        |              |                                                                         |
|----------------------------------------|--------------|-------------------------------------------------------------------------|
| Random sequence generation             | Low risk     | Blocked computer-generated random numbers (Yeoh EE 2003)                |
| Allocation concealment                 | Unclear risk | Not clear                                                               |
| Blinding of participants and personnel | Low risk     | Unlikely to pose any conceptual risks to the ascertainment of mortality |
| Blinding of outcome assessment         | Low risk     | Unlikely to pose any conceptual risks to the ascertainment of mortality |
| Incomplete outcome data                | Low risk     | Report Kaplan Meier estimates, log-rank test results.                   |
| Selective reporting                    | Low risk     | Pre-specified                                                           |
| Other bias                             | Low risk     | Not identified                                                          |

**Study ID: Royal Marsden trial**

| <b>Risk of bias table for outcome a</b> |                                          |                                                                                                                                                                 |
|-----------------------------------------|------------------------------------------|-----------------------------------------------------------------------------------------------------------------------------------------------------------------|
|                                         | <b>Judgement</b> (low/high/unclear risk) | <b>Support for judgement</b>                                                                                                                                    |
| Random sequence generation              | Low risk                                 | "Randomised permuted blocks design from an independent randomisation service offered by the Clinical trials and Statistics Unit, institute of Cancer Research". |
| Allocation concealment                  | Low risk                                 | Allocation carried out by independent randomisation service.                                                                                                    |
| Blinding of participants and personnel  | Low risk                                 | Unmasked design, but we judge that lack of blinding is unlikely to pose any conceptual risks to the ascertainment of mortality.                                 |
| Blinding of outcome assessment          | Low risk                                 | Unmasked design, but we judge that lack of blinding is unlikely to pose any conceptual risks to the ascertainment of mortality.                                 |
| Incomplete outcome data                 | Low risk                                 | Losses of follow-up disclosed, losses were low and balanced between intervention groups.                                                                        |
| Selective reporting                     | Unclear risk                             | Not clear which outcomes were pre-specified.                                                                                                                    |
| Other bias                              | Low risk                                 | No other sources of bias identified.                                                                                                                            |
| <b>Risk of bias table for outcome c</b> |                                          |                                                                                                                                                                 |
|                                         | <b>Judgement</b> (low/high/unclear risk) | <b>Support for judgement</b>                                                                                                                                    |
| Random sequence generation              | Low risk                                 | "Randomised permuted blocks design from an independent randomisation service offered by the Clinical trials and Statistics Unit, institute of Cancer Research". |

|                                        |           |                                                                                          |
|----------------------------------------|-----------|------------------------------------------------------------------------------------------|
| Allocation concealment                 | Low risk  | Allocation carried out by independent randomisation service.                             |
| Blinding of participants and personnel | High risk | Lack of blinding is likely to pose conceptual risks to the toxicity assessment.          |
| Blinding of outcome assessment         | High risk | Lack of blinding is likely to pose conceptual risks to the toxicity assessment.          |
| Incomplete outcome data                | Low risk  | Losses of follow-up disclosed, losses were low and balanced between intervention groups. |
| Selective reporting                    | High risk | Some cut-off values reporting.                                                           |
| Other bias                             | Low risk  | No other sources of bias identified.                                                     |

**Study ID: Zietman trial**

| <b>Risk of bias table for outcomes a, b</b> |                                              |                                                                                                                                                                                                            |
|---------------------------------------------|----------------------------------------------|------------------------------------------------------------------------------------------------------------------------------------------------------------------------------------------------------------|
|                                             | <b>Judgement</b> (low/<br>high/unclear risk) | <b>Support for judgement</b>                                                                                                                                                                               |
| Random sequence generation                  | Low risk                                     | Central randomization                                                                                                                                                                                      |
| Allocation concealment                      | Low risk                                     | Randomized by external body: randomized centrally by the American College of Radiology statistical office on protocol 95-09 of the Proton Radiation Oncology Group between January 1996 and December 1999. |
| Blinding of participants and personnel      | Low risk                                     | Unlikely to pose any conceptual risks to the ascertainment of mortality and biochemical outcomes                                                                                                           |
| Blinding of outcome assessment              | Low risk                                     | Unlikely to pose any conceptual risks to the ascertainment of mortality and biochemical outcomes                                                                                                           |
| Incomplete outcome data                     | Low risk                                     | Follow-up data completed                                                                                                                                                                                   |
| Selective reporting                         | unclear                                      | No clear                                                                                                                                                                                                   |
| Other bias                                  | Low                                          | Not identified                                                                                                                                                                                             |
| <b>Risk of bias table for outcome c</b>     |                                              |                                                                                                                                                                                                            |
|                                             | <b>Judgement</b> (low/<br>high/unclear risk) | <b>Support for judgement</b>                                                                                                                                                                               |
| Random sequence generation                  | Low risk                                     | Central randomization                                                                                                                                                                                      |
| Allocation concealment                      | Low risk                                     | Randomized by external body: randomized centrally by the American College of Radiology statistical office on protocol 95-09 of the Proton Radiation Oncology Group between January 1996 and December 1999. |
| Blinding of participants and                | High risk                                    | Lack of blinding is likely to poses conceptual risks to                                                                                                                                                    |



|                                |           |                                                                             |
|--------------------------------|-----------|-----------------------------------------------------------------------------|
| personnel                      |           | toxicity assessment                                                         |
| Blinding of outcome assessment | High risk | Lack of blinding is likely to poses conceptual risks to toxicity assessment |
| Incomplete outcome data        | Low risk  | Follow-up data completed                                                    |
| Selective reporting            | Unclear   | No clear                                                                    |
| Other bias                     | Low       | Not identified                                                              |

**Study ID: SPCG-4**

| <b>Risk of bias table for outcomes a, b</b> |                                          |                                                                                                                                                                                                                                                                                   |
|---------------------------------------------|------------------------------------------|-----------------------------------------------------------------------------------------------------------------------------------------------------------------------------------------------------------------------------------------------------------------------------------|
|                                             | <b>Judgement</b> (low/high/unclear risk) | <b>Support for judgement</b>                                                                                                                                                                                                                                                      |
| Random sequence generation                  | Low                                      | Stratification according to tumor grade and randomization center. The randomization list was computer generated, and the block size was unknown to the investigators                                                                                                              |
| Allocation concealment                      | Unclear                                  | Not stated                                                                                                                                                                                                                                                                        |
| Blinding of participants and personnel      | Low                                      | Unmasked design, but we judge that lack of blinding is unlikely to pose any conceptual risks to the ascertainment of mortality.                                                                                                                                                   |
| Blinding of outcome assessment              | Low                                      | "Blinding to analyst". The pathologists were blinded to patient outcome and assignment. Only the results from the central review are used. Members of the endpoint committee were blinded to patients' group assignment and treatment received." Or, "Blinded evaluation (2005)". |
| Incomplete outcome data                     | Low                                      | Losses of follow-up disclose                                                                                                                                                                                                                                                      |
| Selective reporting                         | Low                                      | Outcomes pre-specified                                                                                                                                                                                                                                                            |
| Other bias                                  | Low                                      | Not other sources of bias identified.                                                                                                                                                                                                                                             |
| <b>Risk of bias table for outcome c</b>     |                                          |                                                                                                                                                                                                                                                                                   |
|                                             | <b>Judgement</b> (low/high/unclear risk) | <b>Support for judgement</b>                                                                                                                                                                                                                                                      |
| Random sequence generation                  | Low risk                                 | The randomization list was computer generated (Bill-Axelsson,2002)                                                                                                                                                                                                                |
| Allocation concealment                      | Unclear risk                             | Not stated                                                                                                                                                                                                                                                                        |
| Blinding of participants and personnel      | High risk                                | Unmasked design, and lack of blinding could influence reporting of adverse effects                                                                                                                                                                                                |
| Blinding of outcome assessment              | High risk                                | Outcome assessment was obtained by asking patients to return questionnaire after intervention, from which the blinding of assessor is impossible.                                                                                                                                 |

|                         |              |                                                                                                          |
|-------------------------|--------------|----------------------------------------------------------------------------------------------------------|
| Incomplete outcome data | Low risk     | 88% and 87% of participants return questionnaires from prostatectomy and watchful waiting, respectively. |
| Selective reporting     | Unclear risk | Study report doesn't make clear if this outcome were pre-specified.                                      |
| Other bias              | Low risk     | No other sources of bias identified.                                                                     |

**Study ID: Graversen1990**

| <b>Risk of bias table for outcome a</b> |                                          |                                                                                                                                   |
|-----------------------------------------|------------------------------------------|-----------------------------------------------------------------------------------------------------------------------------------|
|                                         | <b>Judgement</b> (low/high/unclear risk) | <b>Support for judgement</b>                                                                                                      |
| Random sequence generation              | Unclear risk                             | More elderly patients in placebo group                                                                                            |
| Allocation concealment                  | Unclear risk                             | Not stated                                                                                                                        |
| Blinding of participants and personnel  | Low risk                                 | Unmasked design, but we judge that lack of blinding is unlikely to pose any conceptual risks to the ascertainment of mortality.   |
| Blinding of outcome assessment          | Low risk                                 | Unmasked design, but we judge that lack of blinding is unlikely to pose any conceptual risks to the ascertainment of mortality.   |
| Incomplete outcome data                 | High risk                                | Outcome data incomplete.                                                                                                          |
| Selective reporting                     | Unclear risk                             | Not stated                                                                                                                        |
| Other bias                              | High risk                                | 31 stage I and 20 stage II patients were assigned to placebo; 31 stage I and 30 stage II patients were assigned to prostatectomy. |

**Study ID: Canada trial**

| <b>Risk of bias table for outcomes a, b</b> |                                          |                                                                                                                                                        |
|---------------------------------------------|------------------------------------------|--------------------------------------------------------------------------------------------------------------------------------------------------------|
|                                             | <b>Judgement</b> (low/high/unclear risk) | <b>Support for judgement</b>                                                                                                                           |
| Random sequence generation                  | Unclear risk                             | No information given                                                                                                                                   |
| Allocation concealment                      | Unclear risk                             | No information given                                                                                                                                   |
| Blinding of participants and personnel      | Low risk                                 | Unmasked design, but we judge that lack of blinding is unlikely to affect treatment failure, overall survival, biopsy rate, disease-specific survival. |
| Blinding of outcome assessment              | Low risk                                 | No blinding mentioned, but we judge that lack of blinding is unlikely to affect treatment failure, overall survival,                                   |

|                                         |                                              |                                                                                                                |
|-----------------------------------------|----------------------------------------------|----------------------------------------------------------------------------------------------------------------|
|                                         |                                              | biopsy rate, disease-specific survival.                                                                        |
| Incomplete outcome data                 | Low risk                                     | Losses to follow-up are fairly low                                                                             |
| Selective reporting                     | Unclear risk                                 | No information given                                                                                           |
| Other bias                              | Low risk                                     | No other sources of bias identified                                                                            |
| <b>Risk of bias table for outcome c</b> |                                              |                                                                                                                |
|                                         | <b>Judgement</b> (low/<br>high/unclear risk) | <b>Support for judgement</b>                                                                                   |
| Random sequence generation              | Unclear risk                                 | No information given                                                                                           |
| Allocation concealment                  | Unclear risk                                 | No information given                                                                                           |
| Blinding of participants and personnel  | High risk (need further discussion)          | Unmasked design, and lack of blinding could influence reporting of adverse effects                             |
| Blinding of outcome assessment          | High risk (need further discussion)          | No blinding of outcome assessors mentioned, and lack of blinding could influence assessment of adverse effects |
| Incomplete outcome data                 | Low risk                                     | Losses to follow-up are fairly low                                                                             |
| Selective reporting                     | Unclear risk                                 | No information given                                                                                           |
| Other bias                              | Low risk                                     | No other sources of bias identified                                                                            |

**Study ID: MRC RT01**

|                                             |                                              |                                                                                                                                                                                                               |
|---------------------------------------------|----------------------------------------------|---------------------------------------------------------------------------------------------------------------------------------------------------------------------------------------------------------------|
| <b>Risk of bias table for outcomes a, b</b> |                                              |                                                                                                                                                                                                               |
|                                             | <b>Judgement</b> (low/<br>high/unclear risk) | <b>Support for judgement</b>                                                                                                                                                                                  |
| Random sequence generation                  | Low risk                                     | Computer-based minimisation algorithm                                                                                                                                                                         |
| Allocation concealmentLow                   | Low risk                                     | Central allocation                                                                                                                                                                                            |
| Blinding of participants and personnel      | Low risk                                     | Unmasked design, but we judge that lack of blinding is unlikely to affect overall survival                                                                                                                    |
| Blinding of outcome assessment              | Low risk                                     | Unmasked design, but we judge that lack of blinding is unlikely to affect overall survival                                                                                                                    |
| Incomplete outcome data                     | Unclear risk                                 | Losses to follow-up are disclosed and appear balanced across groups for other outcomes reported, but we can't adjust for losses to follow-up for overall survival since this outcome isn't formally reported. |
| Selective reporting                         | Low risk                                     | Outcomes pre-specified in trial protocol                                                                                                                                                                      |

|                                         |                                              |                                                                                                                  |
|-----------------------------------------|----------------------------------------------|------------------------------------------------------------------------------------------------------------------|
| Other bias                              | Low risk                                     | No other sources of bias identified.                                                                             |
| <b>Risk of bias table for outcome c</b> |                                              |                                                                                                                  |
|                                         | <b>Judgement</b> (low/<br>high/unclear risk) | <b>Support for judgement</b>                                                                                     |
| Random sequence generation              | Low risk                                     | Computer-based minimisation algorithm                                                                            |
| Allocation concealment                  | Low risk                                     | Central allocation                                                                                               |
| Blinding of participants and personnel  | High risk                                    | Unmasked design, and lack of blinding could influence reporting of adverse effects                               |
| Blinding of outcome assessment          | High risk                                    | No blinding of outcome assessors mentioned, and lack of blinding could influence assessment of adverse effects   |
| Incomplete outcome data                 | Low risk                                     | Adjustment made for losses to follow-up in calculation of the hazard ratios and cumulative proportions reported. |
| Selective reporting                     | Low risk                                     | Outcomes pre-specified in trial protocol                                                                         |
| Other bias                              | Low risk                                     | No other sources of bias identified.                                                                             |

**Study ID: Chin 2008**

|                                             |                                              |                                                                                                                                                                                    |
|---------------------------------------------|----------------------------------------------|------------------------------------------------------------------------------------------------------------------------------------------------------------------------------------|
| <b>Risk of bias table for outcomes a, b</b> |                                              |                                                                                                                                                                                    |
|                                             | <b>Judgement</b> (low/<br>high/unclear risk) | <b>Support for judgement</b>                                                                                                                                                       |
| Random sequence generation                  | Unclear risk                                 | No information given                                                                                                                                                               |
| Allocation concealment                      | Unclear risk                                 | No information given                                                                                                                                                               |
| Blinding of participants and personnel      | Low risk                                     | Unmasked design, but we judge that lack of blinding is unlikely to affect biochemical disease-free survival, disease specific survival, overall survival and positive biopsy       |
| Blinding of outcome assessment              | Low risk                                     | No blinding mentioned, but we judge that lack of blinding is unlikely to affect biochemical disease-free survival, disease specific survival, overall survival and positive biopsy |
| Incomplete outcome data                     | Unclear risk                                 | No information given                                                                                                                                                               |
| Selective reporting                         | Unclear risk                                 | No information given                                                                                                                                                               |
| Other bias                                  | Low risk                                     | No other sources of bias identified.                                                                                                                                               |
| <b>Risk of bias table for outcome c</b>     |                                              |                                                                                                                                                                                    |

|                                        | <b>Judgement</b> (low/<br>high/unclear risk) | <b>Support for judgement</b>                                                                                   |
|----------------------------------------|----------------------------------------------|----------------------------------------------------------------------------------------------------------------|
| Random sequence generation             | Unclear risk                                 | No information given                                                                                           |
| Allocation concealment                 | Unclear risk                                 | No information given                                                                                           |
| Blinding of participants and personnel | High risk                                    | Unmasked design, and lack of blinding could influence reporting of adverse effects                             |
| Blinding of outcome assessment         | High risk                                    | No blinding of outcome assessors mentioned, and lack of blinding could influence assessment of adverse effects |
| Incomplete outcome data                | Unclear risk                                 | No information given                                                                                           |
| Selective reporting                    | Unclear risk                                 | No information given                                                                                           |
| Other bias                             | Low risk                                     | No other sources of bias identified.                                                                           |

**Study ID: MRC RT01 pilot trial****Risk of bias table for outcome b**

|                                        | <b>Judgement</b> (low/<br>high/unclear risk) | <b>Support for judgement</b>                                                                                  |
|----------------------------------------|----------------------------------------------|---------------------------------------------------------------------------------------------------------------|
| Random sequence generation             | Low                                          | Randomised permuted block design                                                                              |
| Allocation concealment                 | Low                                          | Independent randomisation was undertaken by ICR Clinical Trials and Statistics Unit.                          |
| Blinding of participants and personnel | Low                                          | unlikely to pose any conceptual risks to the ascertainment of biochemical failure or local/metastatic failure |
| Blinding of outcome assessment         | Low                                          | unlikely to pose any conceptual risks to the ascertainment of biochemical failure or local/metastatic failure |
| Incomplete outcome data                | Low                                          | Losses of follow-up disclosed                                                                                 |
| Selective reporting                    | Unclear                                      | Unclear whether outcomes reported were pre-specified in the protocol.                                         |
| Other bias                             | Low                                          | Not identified                                                                                                |

**Risk of bias table for outcome c**

|                            | <b>Judgement</b> (low/<br>high/unclear risk) | <b>Support for judgement</b>     |
|----------------------------|----------------------------------------------|----------------------------------|
| Random sequence generation | Low                                          | Randomised permuted block design |

|                                        |           |                                                                                                                |
|----------------------------------------|-----------|----------------------------------------------------------------------------------------------------------------|
| Allocation concealment                 | Low       | Independent randomisation was undertaken by ICR Clinical Trials and Statistics Unit.                           |
| Blinding of participants and personnel | High risk | Unmasked design, and lack of blinding could influence reporting of adverse effects                             |
| Blinding of outcome assessment         | High risk | No blinding of outcome assessors mentioned, and lack of blinding could influence assessment of adverse effects |
| Incomplete outcome data                | Low       | Losses of follow-up disclosed                                                                                  |
| Selective reporting                    | Unclear   | Unclear whether outcomes reported were pre-specified in the protocol.                                          |
| Other bias                             | Low       | Not identified                                                                                                 |

**Study ID: Akakura 2006**

| <b>Risk of bias table for outcomes a, b</b> |                                          |                                                                                                                                                                                                         |
|---------------------------------------------|------------------------------------------|---------------------------------------------------------------------------------------------------------------------------------------------------------------------------------------------------------|
|                                             | <b>Judgement (low/high/unclear risk)</b> | <b>Support for judgement</b>                                                                                                                                                                            |
| Random sequence generation                  | Unclear risk                             | No details given, but may be reported in the earlier design paper                                                                                                                                       |
| Allocation concealment                      | Unclear risk                             | No details given, but may be reported in the earlier design paper                                                                                                                                       |
| Blinding of participants and personnel      | Low risk                                 | Unmasked design, but we judge that lack of blinding is unlikely to affect biochemical progression-free survival, clinical progression-free survival, cause-specific survival and overall survival       |
| Blinding of outcome assessment              | Low risk                                 | No blinding mentioned, but we judge that lack of blinding is unlikely to affect biochemical progression-free survival, clinical progression-free survival, cause-specific survival and overall survival |
| Incomplete outcome data                     | Unclear risk                             | No information given                                                                                                                                                                                    |
| Selective reporting                         | Unclear risk                             | No information given                                                                                                                                                                                    |
| Other bias                                  | Low risk                                 | No other sources of bias identified                                                                                                                                                                     |

**Study ID: Arcangeli 2010**

| <b>Risk of bias table for outcome c</b> |                                          |                              |
|-----------------------------------------|------------------------------------------|------------------------------|
|                                         | <b>Judgement (low/high/unclear risk)</b> | <b>Support for judgement</b> |
| Random sequence generation              | Unclear risk                             | No information               |

|                                             |                                          |                                                                                                        |
|---------------------------------------------|------------------------------------------|--------------------------------------------------------------------------------------------------------|
| Allocation concealment                      | Unclear risk                             | No information                                                                                         |
| Blinding of participants and personnel      | High risk                                | Lack of blinding is likely to poses conceptual risks to toxicity assessment                            |
| Blinding of outcome assessment              | High risk                                | Lack of blinding is likely to pose conceptual risk to the toxicity assessment.                         |
| Incomplete outcome data                     | Low risk                                 | No lost to follow-up                                                                                   |
| Selective reporting                         | Unclear risk                             | No protocol information                                                                                |
| Other bias                                  | Low risk                                 | Not identified                                                                                         |
| <b>Risk of bias table for outcomes a, b</b> |                                          |                                                                                                        |
|                                             | <b>Judgement</b> (low/high/unclear risk) | <b>Support for judgement</b>                                                                           |
| Random sequence generation                  | Unclear risk                             | No information                                                                                         |
| Allocation concealment                      | Unclear risk                             | No information                                                                                         |
| Blinding of participants and personnel      | Low risk                                 | We judge that blinding is less likely to poses high risk on survival and biochemical/clinical outcomes |
| Blinding of outcome assessment              | Low risk                                 | We judge that blinding is less likely to poses high risk on survival and biochemical/clinical outcomes |
| Incomplete outcome data                     | Low risk                                 | No lost to follow-up                                                                                   |
| Selective reporting                         | Unclear risk                             | No protocol information                                                                                |
| Other bias                                  | Low risk                                 | Not identified                                                                                         |

**Study ID: Kopper trial**

|                                         |                                          |                                                                                 |
|-----------------------------------------|------------------------------------------|---------------------------------------------------------------------------------|
| <b>Risk of bias table for outcome c</b> |                                          |                                                                                 |
|                                         | <b>Judgement</b> (low/high/unclear risk) | <b>Support for judgement</b>                                                    |
| Random sequence generation              | Unclear                                  | No information                                                                  |
| Allocation concealment                  | Unclear                                  | No information                                                                  |
| Blinding of participants and personnel  | High                                     | Lack of blinding is likely to pose conceptual risks to the toxicity assessment. |
| Blinding of outcome assessment          | High                                     | Lack of blinding is likely to pose conceptual risks to the toxicity assessment. |
| Incomplete outcome data                 | Low                                      | Follow-up completed in (Kopper 2004)                                            |

|                     |         |                                              |
|---------------------|---------|----------------------------------------------|
| Selective reporting | Unclear | Not clear which outcomes were pre-specified. |
| Other bias          | Low     | No other sources of bias identified          |

**Study ID: Lukka 2005****Risk of bias table for outcomes a, b**

|                                        | <b>Judgement</b> (low/<br>high/unclear risk) | <b>Support for judgement</b>                                                                                                                                                                                                                       |
|----------------------------------------|----------------------------------------------|----------------------------------------------------------------------------------------------------------------------------------------------------------------------------------------------------------------------------------------------------|
| Random sequence generation             | Low risk                                     | "Patients were assigned...according to a central computer-generated randomization schedule..."                                                                                                                                                     |
| Allocation concealment                 | Low risk                                     | Central allocation                                                                                                                                                                                                                                 |
| Blinding of participants and personnel | Low risk                                     | Unmasked design, but we judge that lack of blinding is unlikely to affect overall survival.                                                                                                                                                        |
| Blinding of outcome assessment         | Low risk                                     | Unmasked design, but we judge that lack of blinding is unlikely to affect measurement of overall survival.                                                                                                                                         |
| Incomplete outcome data                | Low risk                                     | Losses to follow-up are balanced across groups, and taken into account in analysis.                                                                                                                                                                |
| Selective reporting                    | Low risk                                     | Methods section implies that all outcomes reported were pre-specified and approved by the study Steering Committee. The primary outcome was altered to an outcome of increasing importance in emerging literature, before the data were unblinded. |
| Other bias                             | Low risk                                     | No other sources of bias identified.                                                                                                                                                                                                               |

**Risk of bias table for outcome c**

|                                        | <b>Judgement</b> (low/<br>high/unclear risk) | <b>Support for judgement</b>                                                                                                                                                                                                                       |
|----------------------------------------|----------------------------------------------|----------------------------------------------------------------------------------------------------------------------------------------------------------------------------------------------------------------------------------------------------|
| Random sequence generation             | Low risk                                     | "Patients were assigned...according to a central computer-generated randomization schedule..."                                                                                                                                                     |
| Allocation concealment                 | Low risk                                     | Central allocation                                                                                                                                                                                                                                 |
| Blinding of participants and personnel | High risk                                    | Lack of blinding is likely to pose conceptual risks to the toxicity assessment.                                                                                                                                                                    |
| Blinding of outcome assessment         | High risk                                    | Lack of blinding is likely to pose conceptual risks to the toxicity assessment.                                                                                                                                                                    |
| Incomplete outcome data                | Low risk                                     | Losses to follow-up are balanced across groups, and taken into account in analysis.                                                                                                                                                                |
| Selective reporting                    | Low risk                                     | Methods section implies that all outcomes reported were pre-specified and approved by the study Steering Committee. The primary outcome was altered to an outcome of increasing importance in emerging literature, before the data were unblinded. |



|            |          |                                      |
|------------|----------|--------------------------------------|
| Other bias | Low risk | No other sources of bias identified. |
|------------|----------|--------------------------------------|

**Study ID: Marzi 2009**

| <b>Risk of bias table for outcome c</b> |                                              |                                                                                                                |
|-----------------------------------------|----------------------------------------------|----------------------------------------------------------------------------------------------------------------|
|                                         | <b>Judgement</b> (low/<br>high/unclear risk) | <b>Support for judgement</b>                                                                                   |
| Random sequence generation              | Unclear risk                                 | No information.                                                                                                |
| Allocation concealment                  | Unclear risk                                 | No information.                                                                                                |
| Blinding of participants and personnel  | High risk                                    | Unmasked design, and lack of blinding could influence reporting of adverse effects                             |
| Blinding of outcome assessment          | High risk                                    | No blinding of outcome assessors mentioned, and lack of blinding could influence assessment of adverse effects |
| Incomplete outcome data                 | High risk                                    | Losses to follow-up are fairly high and no information is given about the patients lost to follow-up.          |
| Selective reporting                     | Unclear risk                                 | Not clear which outcomes were pre-specified.                                                                   |
| Other bias                              | Low risk                                     | No other sources of bias identified.                                                                           |

**Study ID: Norkus 2009**

| <b>Risk of bias table for outcomes a, b</b> |                                              |                                                                                                                                                                                     |
|---------------------------------------------|----------------------------------------------|-------------------------------------------------------------------------------------------------------------------------------------------------------------------------------------|
|                                             | <b>Judgement</b> (low/<br>high/unclear risk) | <b>Support for judgement</b>                                                                                                                                                        |
| Random sequence generation                  | Unclear                                      | Methods not stated                                                                                                                                                                  |
| Allocation concealment                      | Unclear                                      | Methods not stated                                                                                                                                                                  |
| Blinding of participants and personnel      | Low risk                                     | Unmasked design, but we judge that lack of blinding is unlikely to pose any conceptual risks to the ascertainment of mortality and disease control.                                 |
| Blinding of outcome assessment              | Low risk                                     | Unmasked design, but we judge that lack of blinding is unlikely to pose any conceptual risks to the ascertainment of mortality and disease control.                                 |
| Incomplete outcome data                     | Low risk                                     | Low losses to follow-up                                                                                                                                                             |
| Selective reporting                         | Low risk                                     | The two 2009 papers list the planned endpoints and report the early 12-month findings. It's unlikely that other pre-specified outcomes would be omitted at this stage of the trial. |
| Other bias                                  | Low risk                                     | No other bias identified                                                                                                                                                            |

## Study ID: Dutch trial

| Risk of bias table for outcomes a, b      |                                       |                                                                                                         |
|-------------------------------------------|---------------------------------------|---------------------------------------------------------------------------------------------------------|
|                                           | Judgement (low/<br>high/unclear risk) | Support for judgement                                                                                   |
| Random sequence generation                | Low risk                              | Random assignment was performed with a minimization technique with stratification for treatment group   |
| Allocation concealment                    | Low risk                              | Random assignment was performed with a minimization technique with stratification for treatment group   |
| Blinding of participants and personnel    | Low risk                              | Not clear but low risk for mortality                                                                    |
| Blinding of outcome assessment            | Low risk                              | Not clear but low risk for mortality                                                                    |
| Incomplete outcome data                   | Low risk                              | Losses to follow-up disclosed.                                                                          |
| Selective reporting                       | Unclear risk                          | Not clear which outcomes were pre-specified.                                                            |
| Other bias                                | Low risk                              | No other sources of bias identified.                                                                    |
| Risk of bias table for the rest outcome c |                                       |                                                                                                         |
|                                           | Judgement (low/<br>high/unclear risk) | Support for judgement                                                                                   |
| Random sequence generation                | Low risk                              | Random assignment was performed with a minimization technique with stratification for treatment group   |
| Allocation concealment                    | Low risk                              | Random assignment was performed with a minimization technique with stratification for treatment group   |
| Blinding of participants and personnel    | High risk                             | Unmasked design, and lack of blinding could influence reporting of toxicity                             |
| Blinding of outcome assessment            | High risk                             | No blinding of outcome assessors mentioned, and lack of blinding could influence assessment of toxicity |
| Incomplete outcome data                   | Low risk                              | Losses to follow-up disclosed.                                                                          |
| Selective reporting                       | Unclear risk                          | Not clear which outcomes were pre-specified.                                                            |
| Other bias                                | Low risk                              | No other sources of bias identified.                                                                    |

## Study ID: M. D. Anderson trial

| Risk of bias table for outcomes a, b |                                       |                       |
|--------------------------------------|---------------------------------------|-----------------------|
|                                      | Judgement (low/<br>high/unclear risk) | Support for judgement |

|                                         |                                          |                                                                                                                                                                  |
|-----------------------------------------|------------------------------------------|------------------------------------------------------------------------------------------------------------------------------------------------------------------|
| Random sequence generation              | Unclear risk                             | No information.                                                                                                                                                  |
| Allocation concealment                  | Unclear risk                             | No information.                                                                                                                                                  |
| Blinding of participants and personnel  | Low risk                                 | Unmasked design, but we judge that lack of blinding is unlikely to pose any conceptual risks to the ascertainment of mortality and disease progression outcomes. |
| Blinding of outcome assessment          | Low risk                                 | Unmasked design, but we judge that lack of blinding is unlikely to pose any conceptual risks to the ascertainment of mortality and disease progression outcomes. |
| Incomplete outcome data                 | Unclear risk                             | No data on losses to follow-up                                                                                                                                   |
| Selective reporting                     | Unclear risk                             | Not clear which outcomes were pre-specified.                                                                                                                     |
| Other bias                              | Low risk                                 | No other sources of bias identified.                                                                                                                             |
| <b>Risk of bias table for outcome c</b> |                                          |                                                                                                                                                                  |
|                                         | <b>Judgement</b> (low/high/unclear risk) | <b>Support for judgement</b>                                                                                                                                     |
| Random sequence generation              | Unclear risk                             | No information.                                                                                                                                                  |
| Allocation concealment                  | Unclear risk                             | No information.                                                                                                                                                  |
| Blinding of participants and personnel  | High risk                                | Unmasked design, and lack of blinding could influence reporting of toxicity                                                                                      |
| Blinding of outcome assessment          | High risk                                | No blinding of outcome assessors mentioned, and lack of blinding could influence assessment of toxicity                                                          |
| Incomplete outcome data                 | Unclear risk                             | No data on losses to follow-up                                                                                                                                   |
| Selective reporting                     | Unclear risk                             | Cut-points may have been chosen based on significance.                                                                                                           |
| Other bias                              | Low risk                                 | No other sources of bias identified.                                                                                                                             |

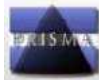

# PRISMA 2009 Checklist

1  
2  
3  
4  
5  
6  
7  
8  
9  
10  
11  
12  
13  
14  
15  
16  
17  
18  
19  
20  
21  
22  
23  
24  
25  
26  
27  
28  
29  
30  
31  
32  
33  
34  
35  
36  
37  
38  
39  
40  
41  
42  
43  
44  
45  
46  
47  
48  
49

| Section/topic                      | #  | Checklist item                                                                                                                                                                                                                                                                                              | Reported on page # |
|------------------------------------|----|-------------------------------------------------------------------------------------------------------------------------------------------------------------------------------------------------------------------------------------------------------------------------------------------------------------|--------------------|
| <b>TITLE</b>                       |    |                                                                                                                                                                                                                                                                                                             |                    |
| Title                              | 1  | Identify the report as a systematic review, meta-analysis, or both.                                                                                                                                                                                                                                         | 1                  |
| <b>ABSTRACT</b>                    |    |                                                                                                                                                                                                                                                                                                             |                    |
| Structured summary                 | 2  | Provide a structured summary including, as applicable: background; objectives; data sources; study eligibility criteria, participants, and interventions; study appraisal and synthesis methods; results; limitations; conclusions and implications of key findings; systematic review registration number. | 2                  |
| <b>INTRODUCTION</b>                |    |                                                                                                                                                                                                                                                                                                             |                    |
| Rationale                          | 3  | Describe the rationale for the review in the context of what is already known.                                                                                                                                                                                                                              | 4 – 5              |
| Objectives                         | 4  | Provide an explicit statement of questions being addressed with reference to participants, interventions, comparisons, outcomes, and study design (PICOS).                                                                                                                                                  | 4 – 5              |
| <b>METHODS</b>                     |    |                                                                                                                                                                                                                                                                                                             |                    |
| Protocol and registration          | 5  | Indicate if a review protocol exists, if and where it can be accessed (e.g., Web address), and, if available, provide registration information including registration number.                                                                                                                               | N/A                |
| Eligibility criteria               | 6  | Specify study characteristics (e.g., PICOS, length of follow-up) and report characteristics (e.g., years considered, language, publication status) used as criteria for eligibility, giving rationale.                                                                                                      | 6                  |
| Information sources                | 7  | Describe all information sources (e.g., databases with dates of coverage, contact with study authors to identify additional studies) in the search and date last searched.                                                                                                                                  | 6                  |
| Search                             | 8  | Present full electronic search strategy for at least one database, including any limits used, such that it could be repeated.                                                                                                                                                                               | Appendix 1         |
| Study selection                    | 9  | State the process for selecting studies (i.e., screening, eligibility, included in systematic review, and, if applicable, included in the meta-analysis).                                                                                                                                                   | 6 – 7<br>Figure 1  |
| Data collection process            | 10 | Describe method of data extraction from reports (e.g., piloted forms, independently, in duplicate) and any processes for obtaining and confirming data from investigators.                                                                                                                                  | 7                  |
| Data items                         | 11 | List and define all variables for which data were sought (e.g., PICOS, funding sources) and any assumptions and simplifications made.                                                                                                                                                                       | 7                  |
| Risk of bias in individual studies | 12 | Describe methods used for assessing risk of bias of individual studies (including specification of whether this was done at the study or outcome level), and how this information is to be used in any data synthesis.                                                                                      | 7                  |
| Summary measures                   | 13 | State the principal summary measures (e.g., risk ratio, difference in means).                                                                                                                                                                                                                               | 8                  |
| Synthesis of results               | 14 | Describe the methods of handling data and combining results of studies, if done, including measures of consistency (e.g., $I^2$ ) for each meta-analysis.                                                                                                                                                   | 8 – 10             |

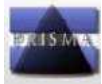

# PRISMA 2009 Checklist

1  
2  
3  
4  
5  
6  
7  
8  
9  
10  
11  
12  
13  
14  
15  
16  
17  
18  
19  
20  
21  
22  
23  
24  
25  
26  
27  
28  
29  
30  
31  
32  
33  
34  
35  
36  
37  
38  
39  
40  
41  
42  
43  
44  
45  
46  
47  
48  
49

| Section/topic                 | #  | Checklist item                                                                                                                                                                                           | Reported on page # |
|-------------------------------|----|----------------------------------------------------------------------------------------------------------------------------------------------------------------------------------------------------------|--------------------|
| Risk of bias across studies   | 15 | Specify any assessment of risk of bias that may affect the cumulative evidence (e.g., publication bias, selective reporting within studies).                                                             | 7 – 10             |
| Additional analyses           | 16 | Describe methods of additional analyses (e.g., sensitivity or subgroup analyses, meta-regression), if done, indicating which were pre-specified.                                                         | 9 – 10             |
| <b>RESULTS</b>                |    |                                                                                                                                                                                                          |                    |
| Study selection               | 17 | Give numbers of studies screened, assessed for eligibility, and included in the review, with reasons for exclusions at each stage, ideally with a flow diagram.                                          | 11                 |
| Study characteristics         | 18 | For each study, present characteristics for which data were extracted (e.g., study size, PICOS, follow-up period) and provide the citations.                                                             | Appendix 2         |
| Risk of bias within studies   | 19 | Present data on risk of bias of each study and, if available, any outcome level assessment (see item 12).                                                                                                | Figure 2           |
| Results of individual studies | 20 | For all outcomes considered (benefits or harms), present, for each study: (a) simple summary data for each intervention group (b) effect estimates and confidence intervals, ideally with a forest plot. | 12 – 14            |
| Synthesis of results          | 21 | Present results of each meta-analysis done, including confidence intervals and measures of consistency.                                                                                                  | 12 – 14            |
| Risk of bias across studies   | 22 | Present results of any assessment of risk of bias across studies (see Item 15).                                                                                                                          | Appendix 3         |
| Additional analysis           | 23 | Give results of additional analyses, if done (e.g., sensitivity or subgroup analyses, meta-regression [see Item 16]).                                                                                    | 12 – 21            |
| <b>DISCUSSION</b>             |    |                                                                                                                                                                                                          |                    |
| Summary of evidence           | 24 | Summarize the main findings including the strength of evidence for each main outcome; consider their relevance to key groups (e.g., healthcare providers, users, and policy makers).                     | 23                 |
| Limitations                   | 25 | Discuss limitations at study and outcome level (e.g., risk of bias), and at review-level (e.g., incomplete retrieval of identified research, reporting bias).                                            | 23                 |
| Conclusions                   | 26 | Provide a general interpretation of the results in the context of other evidence, and implications for future research.                                                                                  | 24                 |
| <b>FUNDING</b>                |    |                                                                                                                                                                                                          |                    |
| Funding                       | 27 | Describe sources of funding for the systematic review and other support (e.g., supply of data); role of funders for the systematic review.                                                               | 25                 |

From: Moher D, Liberati A, Tetzlaff J, Altman DG, The PRISMA Group (2009). Preferred Reporting Items for Systematic Reviews and Meta-Analyses: The PRISMA Statement. PLoS Med 6(6): e1000097. doi:10.1371/journal.pmed1000097

For more information, visit: [www.prisma-statement.org](http://www.prisma-statement.org).

# BMJ Open

## Comparative Efficacy and Safety of Treatments for Localized Prostate Cancer: An Application of Network Meta-Analysis.

|                                 |                                                                                                                                                                                                                                                                                                  |
|---------------------------------|--------------------------------------------------------------------------------------------------------------------------------------------------------------------------------------------------------------------------------------------------------------------------------------------------|
| Journal:                        | <i>BMJ Open</i>                                                                                                                                                                                                                                                                                  |
| Manuscript ID:                  | bmjopen-2013-004285.R1                                                                                                                                                                                                                                                                           |
| Article Type:                   | Research                                                                                                                                                                                                                                                                                         |
| Date Submitted by the Author:   | 18-Mar-2014                                                                                                                                                                                                                                                                                      |
| Complete List of Authors:       | Xiong, Tengbin; University of Cambridge, Department of Oncology<br>Turner, Rebecca; MRC Biostatistics Unit,<br>Wei, Yinghui; MRC Clinical Trials Unit,<br>Neal, David; University of Cambridge,<br>Lyratzopoulos, Georgios; University of Cambridge,<br>Higgins, Julian; MRC Biostatistics Unit, |
| <b>Primary Subject Heading</b>: | Research methods                                                                                                                                                                                                                                                                                 |
| Secondary Subject Heading:      | Evidence based practice, Health services research, Oncology, Urology                                                                                                                                                                                                                             |
| Keywords:                       | Prostate cancer, Treatment, Randomised trials, Systematic review, Meta-analysis                                                                                                                                                                                                                  |
|                                 |                                                                                                                                                                                                                                                                                                  |

SCHOLARONE™  
Manuscripts

1  
2  
3 **COMPARATIVE EFFICACY AND SAFETY OF TREATMENTS FOR LOCALIZED PROSTATE**  
4 **CANCER: AN APPLICATION OF NETWORK META-ANALYSIS**  
5  
6  
7

8 **Tengbin Xiong, PhD**

9 *Research Associate, Department of Oncology, University of Cambridge, Box 279 (S4),*  
10 *Addenbrooke's Hospital, Hills Road, Cambridge, CB2 0QQ, UK*  
11

12  
13 **Rebecca M Turner, PhD**

14 *Statistician, MRC Biostatistics Unit, Institute of Public Health, Forvie Site, Robinson Way,*  
15 *Cambridge, CB2 0SR, UK*  
16

17  
18 **Yinghui Wei, PhD**

19 *Statistician, London Hub for Trials Methodology Research, MRC Clinical Trials Unit,*  
20 *Aviation House, 125 Kingsway, London WC2B 6NH, UK*  
21 *Lecturer in Statistics, School of Computing and Mathematics, Plymouth University,*  
22 *Plymouth, PL4 8AA, UK*  
23  
24

25 **David E Neal, MS, FMedSci, FSB, FRCS, FFPM**

26 *Professor of Surgical Oncology and Hon Consultant Urological Surgeon, Department of*  
27 *Oncology, University of Cambridge, Box 279 (S4), Addenbrooke's Hospital, Hills Road,*  
28 *Cambridge, CB2 0QQ, UK*  
29  
30

31 **Georgios Lyratzopoulos, MD**

32 *Clinical Senior Research Associate in Public Health / Epidemiology, Department of Public*  
33 *Health and Primary Care, Cambridge Centre for Health Services Research, University of*  
34 *Cambridge, Forvie Site, Robinson Way, Cambridge CB2 0SR, UK*  
35  
36

37 **Julian P T Higgins, PhD**

38 *Senior Statistician, MRC Biostatistics Unit, Institute of Public Health, Forvie Site,*  
39 *Robinson Way, Cambridge, CB2 0SR, UK*  
40 *Chair in Evidence Synthesis, Centre for Reviews and Dissemination, University of York,*  
41 *York YO10 5DD, UK*  
42  
43  
44  
45  
46

47 Word count: 2925  
48

49  
50  
51 Key words: *Prostate cancer; Treatment; Randomised trials; Systematic review; Meta-*  
52 *analysis.*  
53  
54

55 Corresponding author: *Tengbin Xiong, Department of Oncology, University of*  
56 *Cambridge, Box 279 (S4), Addenbrooke's Hospital, Hills Road, Cambridge, CB2 0QQ,*  
57 *UK*  
58  
59  
60

**ABSTRACT**

**Context:** There is ongoing uncertainty about the optimal management of patients with localized prostate cancer.

**Objective:** To evaluate the comparative efficacy and safety of different treatments for patients with localized prostate cancer.

**Design:** Systematic review with Bayesian network meta-analysis to estimate comparative odds ratios, and a score (0-100%) that, for a given outcome, reflects average rank order of superiority of each treatment compared against all others, using the surface under the cumulative ranking curve (SUCRA) statistic.

**Data sources:** Electronic searches of Medline without language restriction.

**Study selection:** Randomized trials comparing the efficacy and safety of different primary treatments (48 papers from 21 randomized trials included 7,350 men).

**Data extraction:** Two reviewers independently extracted data and assessed risk of bias.

**Results:** Comparative efficacy and safety evidence was available for prostatectomy, external beam radiotherapy (different types and regimens), observational management and cryotherapy, but not high intensity focused ultrasound (HIFU). There was no evidence of superiority for any of the compared treatments in respect of all-cause mortality after 5 years. Cryotherapy was associated with less gastrointestinal and genitourinary toxicity than radiotherapy (SUCRA: 99% and 77% for gastrointestinal and genitourinary toxicity, respectively).

**Conclusions:** The limited available evidence suggests that different treatments may be optimal for different efficacy and safety outcomes. These findings highlight the importance of informed patient choice and shared-decision making about treatment modality and acceptable trade-offs between different outcomes. More trial evidence is required to reduce uncertainty. Network meta-analysis may be useful to optimise the power of evidence synthesis studies once data from new randomised controlled studies in this field are published in the future.



## ARTICLE SUMMARY

### *Article focus*

- To evaluate the comparative efficacy and safety of different treatments for patients with localized prostate cancer.

### *Key messages*

- Comparative efficacy and safety evidence was available for prostatectomy, external beam radiotherapy (different types and regimens), observational management and cryotherapy, but not high intensity focused ultrasound (HIFU).
- There was no evidence of superiority for any of the compared treatments in respect of all-cause mortality. Different treatments may be optimal for different efficacy and safety outcomes.
- Network meta-analysis may be useful to optimise the power of evidence synthesis studies once data from new randomised controlled studies in this field are published in the future.

### *Strengths and limitations of this study*

- Network meta-analysis enabled us to integrate evidence from both direct comparisons (treatments compared head-to-head within a randomized trial) and indirect comparisons (treatments compared by combining the results of randomized trials with common comparators).
- This network meta-analysis only included randomised controlled trials and the risk of bias in each included study had been comprehensively assessed by using the Cochrane Collaboration's Risk of Bias tool, which strengthens the robustness of evidence synthesis.
- The number of available randomized controlled trials was small which could be a limitation of the study.

## BACKGROUND

Prostate cancer is a worldwide major public health issue.<sup>1</sup> Nearly 75% of diagnosed cases, however, occur in developed countries,<sup>2</sup> where it is typically the most common cancer in men.<sup>3-4</sup> In the UK, about 40,000 men are diagnosed with prostate cancer and 10,000 men die from it every year.<sup>3</sup> In the US, there are 240,000 new diagnoses of prostate cancer, with 34,000 associated deaths every year.<sup>5</sup> Most patients with prostate cancers are diagnosed at an early stage,<sup>6-7</sup> and many diagnoses are made in asymptomatic men.<sup>8-10</sup>

The main treatment options for localized prostate cancer include radical prostatectomy, external beam radiotherapy and observational management (that is, regular testing of clinical, biochemical or radiological markers or as prompted by occurrence of symptoms).<sup>8</sup> Because some of these treatments are associated with substantial risk of side effects, it is important to try to resolve the current uncertainty about the optimal treatment options.

Some randomized trials have compared the efficacy and safety of two or three treatments. For example, the SPCG-4 trial in Europe and the PIVOT study in the US compared radical prostatectomy with observational management.<sup>11-12</sup> The UK Prostate Testing for Cancer and Treatment ( ProtecT) trial is evaluating treatment effectiveness of active monitoring, radical prostatectomy and external beam radiotherapy for clinically localized prostate cancer in men aged 50-69 years identified through population-based PSA testing.<sup>13</sup> The recruitment phase for the ProtecT trial, which began in 1999, has been completed, but outcomes will not be available until a minimum follow-up period has been accrued.

1  
2  
3 It is unlikely that any single trial will compare all available treatment options. We  
4 therefore performed a network meta-analysis based on a systematic review of  
5 completed randomized trials comparing different interventions for patients with  
6 localized prostate cancer. The network meta-analysis allowed us to integrate  
7 evidence from both direct comparisons (treatments compared head-to-head within a  
8 randomized trial) and indirect comparisons (treatments compared by combining the  
9 results of randomized trials with common comparators).<sup>14-16</sup> Our objective was to  
10 apply the established methodology used in network meta-analysis to an area of  
11 clinical practice where no such previous studies existed. In doing so, our aims were  
12 to summarise existing evidence; 'map out' current gaps in comparative evidence to  
13 help motivate the design and conduct of future comparative studies; and develop an  
14 approach 'primed' for subsequent updating and incorporation of future trial evidence.  
15  
16  
17  
18  
19  
20  
21  
22  
23  
24  
25  
26  
27  
28  
29  
30  
31  
32  
33  
34  
35  
36  
37  
38  
39  
40  
41  
42  
43  
44  
45  
46  
47  
48  
49  
50  
51  
52  
53  
54  
55  
56  
57  
58  
59  
60

## METHODS

### Eligibility criteria

We sought completed randomized trials in men with localized prostate cancer that had compared two or more of the following interventions (as primary treatment, with or without the same adjuvant therapy in all arms): prostatectomy; radiotherapy including brachytherapy; cryotherapy; high-intensity focused ultrasound (HIFU) and observational management. Observational management is characterized by testing of clinical, biochemical or radiological markers of disease progression at regular intervals (typically every 6 months) or as prompted by the occurrence of new symptoms, possibly leading to either radical or palliative treatment. We opted to use the term 'observational management' in preference to active surveillance or active monitoring because the latter terms typically aim to keep men in a window of curability so that only those who require it undergo radical treatment.

Eligible trials had to have reported any of the following efficacy and safety outcomes: all-cause mortality, prostate cancer mortality and gastrointestinal or genitourinary toxicity. Studies comparing treatment combinations or sequences (e.g. per protocol management by surgery with subsequent radiotherapy) were excluded.

### Identification of studies

We adopted the search strategy of a systematic review that supported the development of clinical guidelines on the diagnosis and treatment of prostate cancer by the UK's National Institute for Health and Clinical Excellence (NICE) in 2008.<sup>8</sup>

Studies had been identified by searching Medline (in 2006) and scanning reference list of papers. We retrieved all relevant randomized trials identified in the NICE guideline and implemented the same search strategies to update the collection of trials. We restricted the search to the period from January 2005 to September 2012.

1  
2  
3 No language limits were placed on the searches (see Appendix 1 for full search  
4 strategies).  
5  
6  
7

### 8 9 **Data extraction**

10  
11 Two reviewers (TX and RT) independently screened all the titles and abstracts of the  
12 studies retrieved by the searches for potentially eligible trials, and then independently  
13 assessed the full articles of these trials to confirm whether they met the eligibility  
14 criteria. The results were checked and discussed by TX and RT to agree upon a final  
15 list of included studies. Using a structured and piloted data collection form, all  
16 relevant data in each included paper were extracted by two reviewers independently  
17 (TX and RT/YW). The data extracted were cross-checked and unresolved  
18 discrepancies were referred to a third reviewer; where necessary, problems were  
19 discussed in a panel meeting (TX, RT, YW, JH and GL) whilst DN acted as a clinical  
20 expert advisor.  
21  
22  
23  
24  
25  
26  
27  
28  
29  
30  
31

32  
33 For each included study, we extracted characteristics of participants and  
34 interventions, outcomes reported and collected, sample size (randomized and  
35 analysed) in each arm, numerical results, losses to follow-up and details of patients  
36 excluded from the analyses.<sup>17</sup> To inform the appropriateness of including studies in  
37 the meta-analysis and facilitate assessment of the strength of the evidence we  
38 assessed the risk of bias in each included study using The Cochrane Collaboration's  
39 Risk of Bias tool.<sup>18</sup> Two reviewers (TX and either RT or YW) completed this  
40 independently and agreed on final assessments. The tool assesses risk of bias  
41 arising from inadequacies in processes of generation of the random allocation  
42 sequence, concealment of the allocation sequence and blinding, and from incomplete  
43 outcome data and selective outcome reporting.  
44  
45  
46  
47  
48  
49  
50  
51  
52  
53  
54  
55  
56  
57  
58  
59  
60

## Outcomes

We analysed all-cause mortality and cancer-related mortality at 5 years, late gastrointestinal and late genitourinary toxicity at 3 years. The choice of these follow-up times was pragmatic, as they were the ones most frequently reported in the included trials. Once these time points had been chosen, we extracted the outcome data from the time nearest to these targeted measurement times. Late gastrointestinal and late genitourinary toxicity were defined as scores  $\geq 2$  measured by the Radiation Therapy Oncology Group (RTOG) questionnaire scale by 3 years follow-up.<sup>19</sup> We have not encompassed biochemical or clinical failure as operational definitions of either of those outcomes tend to be specific to different radical treatment modalities.<sup>20</sup>

## Statistical analyses

Initially, we compared each pair of treatments using direct evidence alone, for each outcome. Separate meta-analyses were performed for each pair-wise comparison of interventions: a random-effects model was fitted within each comparison,<sup>21</sup> with a common between-study heterogeneity variance assumed across comparisons to allow for heterogeneity even when only a single study was available. Results are reported as odds ratios with 95% confidence intervals, for every comparison evaluated directly in one or more studies.

Next, we fitted a network meta-analysis model for each outcome separately,<sup>22</sup> combining direct evidence for each comparison (e.g. from studies comparing interventions A with B) with indirect evidence (e.g. from studies comparing A with C and studies comparing B with C), for all pair-wise comparisons simultaneously. The model accounts explicitly for the binary nature of each outcome using a binomial likelihood function; allows for heterogeneity of treatment effects between trials of the

1  
2  
3 same comparison (assuming the same amount of heterogeneity for each  
4 comparison, irrespective of how many trials address it); and enforces an underlying  
5 relationship between direct and indirect evidence for a particular comparison,  
6 assuming these are consistent between the two sources. For each 'loop' of treatment  
7 comparisons from three or more independent sources and for each outcome, we  
8 computed the difference between estimates from direct and indirect evidence on the  
9 log odds ratio scale.<sup>100</sup> This provides a measure of inconsistency between the  
10 different sources. We did not implement more sophisticated methods for testing or  
11 adjusting for inconsistency, due to the small number of loops in the network.  
12  
13  
14  
15  
16  
17  
18  
19  
20  
21  
22

23 Results are reported as odds ratios with 95% credible intervals, for all pair-wise  
24 comparisons of interventions. All analyses were performed within a Bayesian  
25 framework, using Markov chain Monte Carlo methods in WinBUGS (MRC  
26 Biostatistics Unit, Cambridge, UK).<sup>23</sup> Informative prior distributions were used for the  
27 heterogeneity variance, from a published set of distributions for heterogeneity  
28 expected in meta-analyses examining particular intervention and outcome types,<sup>24</sup>  
29 since heterogeneity is imprecisely estimated when the number of studies is small.  
30 For all-cause mortality, a log-normal  $(-3.93, 1.51^2)$  distribution was used. For  
31 gastrointestinal and genitourinary toxicity, a log-normal  $(-2.01, 1.64^2)$  distribution was  
32 used. For cancer-related mortality, a log-normal  $(-2.89, 1.91^2)$  distribution was used.  
33 Vague  $N(0, 10^4)$  priors were used for all other model parameters. Results were  
34 based on 100,000 iterations, following a burn-in of 20,000 iterations.  
35  
36  
37  
38  
39  
40  
41  
42  
43  
44  
45  
46  
47  
48  
49

50 For each outcome, we estimated the probability that each intervention is superior to  
51 all others, the second best, the third best and so on, from the rank orderings of the  
52 treatments at each iteration of the Markov chain. These ranking probabilities were  
53 used to calculate a summary numerical value: the SUCRA (surface under the  
54 cumulative ranking curve).<sup>25</sup> SUCRA values are expressed as percentages; if an  
55  
56  
57  
58  
59  
60

1  
2  
3 intervention is certainly the best, its SUCRA value would be 100%, and if an  
4  
5 intervention is certainly the worst, its SUCRA value would be 0%. If all interventions  
6  
7 are equivalent, we would expect all SUCRA values to be near 50%. We also report  
8  
9 the median ranks and 95% credible intervals for each intervention.  
10  
11  
12  
13  
14  
15  
16  
17  
18  
19  
20  
21  
22  
23  
24  
25  
26  
27  
28  
29  
30  
31  
32  
33  
34  
35  
36  
37  
38  
39  
40  
41  
42  
43  
44  
45  
46  
47  
48  
49  
50  
51  
52  
53  
54  
55  
56  
57  
58  
59  
60



## RESULTS

### Included studies and interventions

The NICE systematic review<sup>8</sup> had identified 20 reports relating to 14 randomized trials.<sup>26-45</sup> Our updated searches retrieved 1,740 studies and identified 39 reports of relevant randomized trials, of which 30 had not been included in the NICE review (Figure 1).<sup>46-75</sup> One of these reports was the sole report of a trial providing data only on acute toxicity,<sup>40</sup> one paper reported only clinical failure,<sup>38</sup> and one paper reported biochemical failure, biochemical disease-free survival and quality of life;<sup>56</sup> these 3 studies were then excluded since they did not report the outcomes of interest to us. In addition to the remaining 47 full papers from peer-reviewed journals, we identified and included in the analysis data from a conference abstract, describing a randomized trial comparing external beam radiotherapy versus watchful waiting,<sup>76</sup> and reporting data on long term mortality not previously reported in full-text related publications.<sup>77-78</sup>

Our searches also identified 16 relevant systematic reviews.<sup>79-94</sup> We scrutinized the reference lists of all these as well as any further systematic reviews identified by the NICE review, and found no further relevant randomized trials.

The 48 identified reports described 21 randomized trials comparing the effectiveness of different treatments for localized prostate cancer.<sup>26-37, 39, 41-55, 57-76</sup> Seventeen trials reported all-cause mortality, 16 trials reported cancer-related mortality, 16 trials reported gastrointestinal (GI) toxicity, 15 trials reported genitourinary (GU) toxicity.

The characteristics of included studies are summarized in Appendix 2.

The risk of bias assessments for the included trials are illustrated in Figure 2. Most of the evidence was of moderate to good quality. About half of the studies did not report

1  
2  
3 adequate information about allocation sequence generation and allocation sequence  
4 concealment. Unblinded designs were used in all trials included; we judged this  
5 unlikely to cause bias for objectively-measured outcomes such as mortality, but  
6 generate bias in the reporting and assessment of patient-reported toxicity outcomes.  
7  
8 The small number of studies precluded the investigation of potential reporting biases  
9 across studies (for example using funnel plots). Our searches were appropriate, but  
10 the possibility of publication bias cannot be excluded. It is unclear, however, whether  
11 reporting biases would tend to favour any particular treatment (see Appendix 3 for  
12 details of bias assessments for included trials).  
13  
14  
15  
16  
17  
18  
19  
20  
21  
22

23 We categorized the interventions into the following eight categories: observational  
24 management; prostatectomy; conventional radiotherapy (refers to two dimensional  
25 external beam radiation therapy); conventional radiotherapy- hypofractionated (refers  
26 to less than 20 fractions); conformal low dose (LD) radiotherapy (refers to less than  
27 68 Gy); conformal high dose (HD) radiotherapy (refers to more than 74 Gy);  
28 conformal LD radiotherapy-hypofractionated; and cryotherapy. Twenty trials had two  
29 intervention arms. One trial compared three interventions,<sup>54</sup> since two of the three  
30 interventions were very similar and both met our definition of conformal LD  
31 radiotherapy-hypofractionated, we combined the data from these two arms and  
32 regarded the trial as a two-treatment comparison (conformal LD radiotherapy-  
33 hypofractionated versus conformal HD radiotherapy). None of the reviewed studied  
34 assessed brachytherapy and HIFU. Figure 3 illustrates the full network of  
35 comparisons. There were two closed loops of comparisons, one connecting  
36 prostatectomy, observational management and radiotherapy modalities; and the  
37 other connecting different radiotherapy modalities.<sup>100</sup> No inconsistency was detected  
38 in our estimates of the difference between direct and indirect evidence; however,  
39 precision was very low. Cryotherapy only had a single link to the network.  
40  
41  
42  
43  
44  
45  
46  
47  
48  
49  
50  
51  
52  
53  
54  
55  
56  
57  
58  
59  
60

### All-cause mortality

All-cause mortality was reported in 17 trials, covering all the eight interventions of interest. There is no evidence of superiority of any treatment for all-cause mortality. For each pairwise comparison of interventions, the 95% intervals for odds ratios were wide and included 1. The lower-left triangle of results in Table 1 presents odds ratios estimated from direct evidence alone, while the upper-right triangle of results presents odds ratios estimated from the network meta-analysis. The intervals are slightly narrower when based on indirect as well as direct evidence rather than direct evidence alone. The SUCRA values presented in Table 2 summarize the ranking information for all interventions. With respect to all-cause mortality, the highest SUCRA values are 69% for conformal LD radiotehrapy-hypofractionated and 63% for conformal HD radiotherapy, indicating that these are most likely to be among the best treatments for this outcome. However, there is very high uncertainty in the rankings of the interventions, as indicated by wide 95% credible intervals.

### Cancer-related mortality

Cancer-related mortality was reported in 16 trials, covering eight of the interventions. This was a rare outcome in most treatment groups, as expected for patients with localized prostate cancer with a 5 year end point. Odds ratio estimates had wide 95% credible intervals, particularly in comparisons for which only indirect evidence was available, and there was no evidence of superiority for any of the comparator treatments (Table 3). Based on direct comparisons alone, conformal HD radiotherapy was superior to conventional radiotherapy [odds ratio 0.21 (95% interval 0.03, 0.97)] and prostatectomy was superior to observational management [odds ratio 0.60 (95% interval 0.37, 0.98)].

### Gastrointestinal and genitourinary toxicity

Late gastrointestinal toxicity was reported in 16 trials and late genitourinary toxicity was reported in 15 trials. There was evidence that cryotherapy resulted in fewer adverse gastrointestinal events than radiotherapy treatments (estimated odds ratios comparing cryotherapy against the five radiotherapy options ranged from 0.12 to 0.24, whilst all but one of the respective 95% credible intervals excluded 1). The SUCRA value of 99% for cryotherapy and the median rank of 1 (95% interval 1, 2) suggest that cryotherapy is almost certainly superior among the six treatments included in the network meta-analysis in relation to adverse gastrointestinal events (Table 2 and 4). There was also evidence that gastrointestinal toxicity was more likely with conformal HD radiotherapy than with conformal LD radiotherapy.

Interpretation of such findings for toxicity should be more cautious than for the other outcomes, due to a concern that lack of blinding could have led to a risk of detection bias. For genitourinary toxicity, there was no evidence favouring one intervention over another (Table 5), although cryotherapy tended to receive better rankings than the five radiotherapy treatments (Table 2), and the odds ratio estimates favour cryotherapy, but the 95% intervals all included 1.

1  
2  
3  
4  
5  
6  
7  
8  
9  
10  
11  
12  
13  
14  
15  
16  
17  
18  
19  
20  
21  
22  
23  
24  
25  
26  
27  
28  
29  
30  
31  
32  
33  
34  
35  
36  
37  
38  
39  
40  
41  
42  
43  
44  
45  
46  
47  
48  
49

**Table 1.** All-cause mortality: odds ratios (posterior mean with 95% intervals) for each pair-wise comparison of interventions, based on direct evidence alone (lower-left triangle) or direct and indirect evidence (upper-right triangle).

| Intervention                               | Observational management      | Prostatectomy                 | Conventional radiotherapy     | Conventional radiotherapy-hypofractionated | Conformal LD radiotherapy     | Conformal HD radiotherapy     | Conformal LD radiotherapy-hypofractionated | Cryotherapy      |
|--------------------------------------------|-------------------------------|-------------------------------|-------------------------------|--------------------------------------------|-------------------------------|-------------------------------|--------------------------------------------|------------------|
| Observational management                   |                               | 0.79 (0.61,1.02)              | 0.84 (0.48,1.57)              | 0.72 (0.37,1.49)                           | 0.73 (0.44,1.26)              | 0.70 (0.40,1.28)              | 0.53 (0.10,2.88)                           | 0.76 (0.28,1.98) |
| Prostatectomy                              | <sup>3</sup> 0.80 (0.61,1.06) |                               | 1.06 (0.60,2.02)              | 0.91 (0.46,1.90)                           | 0.92 (0.54,1.64)              | 0.88 (0.49,1.66)              | 0.67 (0.12,3.65)                           | 0.96 (0.36,2.56) |
| Conventional radiotherapy                  | -                             | <sup>1</sup> 1.34 (0.55,3.24) |                               | 0.85 (0.59,1.24)                           | 0.86 (0.55,1.35)              | 0.82 (0.51,1.35)              | 0.62 (0.11,3.21)                           | 0.90 (0.41,1.89) |
| Conventional radiotherapy-hypofractionated | -                             | -                             | <sup>2</sup> 0.85 (0.59,1.24) |                                            | 1.01 (0.56,1.80)              | 0.97 (0.53,1.78)              | 0.73 (0.13,3.86)                           | 1.05 (0.44,2.42) |
| Conformal LD radiotherapy                  | <sup>1</sup> 0.66 (0.35,1.21) | -                             | <sup>1</sup> 0.92 (0.50,1.72) | -                                          |                               | 0.96 (0.72,1.29)              | 0.72 (0.14,3.51)                           | 1.04 (0.42,2.49) |
| Conformal HD radiotherapy                  | -                             | -                             | <sup>1</sup> 0.87 (0.39,1.92) | -                                          | <sup>4</sup> 0.95 (0.70,1.31) |                               | 0.74 (0.14,3.61)                           | 1.09 (0.43,2.64) |
| Conformal LD radiotherapy-hypofractionated | -                             | -                             | -                             | -                                          | -                             | <sup>2</sup> 0.78 (0.13,4.25) |                                            | 1.47 (0.22,9.40) |
| Cryotherapy                                | -                             | -                             | <sup>2</sup> 0.90 (0.41,2.02) | -                                          | -                             | -                             | -                                          |                  |

LD: low dose; HD: high dose.

Lower-left results compare row-defining interventions against column-defining interventions. Upper-right results compare column-defining interventions against row-defining interventions.

In the meta-analysis of direct comparisons (reported in lower-left triangle), between-trial heterogeneity  $\tau^2$  was estimated as 0.009 (95% interval 0.001 to 0.08). In the network meta-analysis (reported in upper-right triangle), between-trial heterogeneity  $\tau^2$  was estimated as 0.009 (95% interval 0.001 to 0.07).

The small superscript numbers in the cells of lower-left triangle indicate the numbers of randomized trials which compared the two interventions directly.

**Table 2.** Ranking of interventions with respect to all-cause and cancer-related mortality, adverse gastrointestinal and genitourinary events: SUCRA (Surface Under the Cumulative RAnking curve) values and median ranks (with 95% intervals).†

| Intervention                               | All-cause mortality |                            | Cancer-related mortality |                            | Adverse gastrointestinal events |                            | Adverse genitourinary events |                            |
|--------------------------------------------|---------------------|----------------------------|--------------------------|----------------------------|---------------------------------|----------------------------|------------------------------|----------------------------|
|                                            | SUCRA value         | Median rank (95% interval) | SUCRA value              | Median rank (95% interval) | SUCRA value                     | Median rank (95% interval) | SUCRA value                  | Median rank (95% interval) |
| Observational management                   | 18%                 | 7 (2, 8)                   | 30%                      | 6 (3, 8)                   | -                               | -                          | -                            | -                          |
| Prostatectomy                              | 49%                 | 5 (1, 7)                   | 64%                      | 4 (1, 7)                   | -                               | -                          | -                            | -                          |
| Conventional radiotherapy                  | 35%                 | 6 (2, 8)                   | 16%                      | 7 (4, 8)                   | 43%                             | 4 (2, 6)                   | 51%                          | 3 (1, 6)                   |
| Conventional radiotherapy-hypofractionated | 58%                 | 4 (1, 8)                   | 44%                      | 5 (1, 8)                   | 42%                             | 4 (1, 6)                   | 50%                          | 3 (1, 6)                   |
| Conformal LD radiotherapy                  | 57%                 | 4 (1, 7)                   | 61%                      | 4 (2, 7)                   | 67%                             | 2 (2, 4)                   | 66%                          | 3 (1, 5)                   |
| Conformal HD radiotherapy                  | 63%                 | 3 (1, 7)                   | 75%                      | 2 (1, 6)                   | 19%                             | 5 (3, 6)                   | 30%                          | 5 (2, 6)                   |
| Conformal LD radiotherapy-hypofractionated | 69%                 | 1 (1, 8)                   | 85%                      | 1 (1, 8)                   | 30%                             | 5 (2, 6)                   | 26%                          | 5 (1, 6)                   |
| Cryotherapy                                | 50%                 | 4 (1, 8)                   | 24%                      | 7 (2, 8)                   | 99%                             | 1 (1, 2)                   | 77%                          | 1 (1, 6)                   |

† The surface under the cumulative ranking curve (SUCRA) value is a numerical summary of the estimated probabilities that each treatment is the best, second best, third best (and so on) for that particular outcome. Higher values indicate higher rankings compared with other treatments. For example, for cryotherapy, the high SUCRA value of 99% and median rank of 1 for adverse gastrointestinal events shows that cryotherapy is expected to be superior with respect to this outcome.

LD: low dose; HD: high dose.

**Table 3.** Prostate cancer-caused mortality: odds ratios (posterior mean with 95% intervals) for each pair-wise comparison of interventions, based on direct evidence alone (lower-left triangle) or direct and indirect evidence (upper-right triangle).

| Intervention                               | Observational management      | Prostatectomy                 | Conventional radiotherapy     | Conventional radiotherapy-hypofractionated | Conformal LD radiotherapy     | Conformal HD radiotherapy      | Conformal LD radiotherapy-hypofractionated | Cryotherapy      |
|--------------------------------------------|-------------------------------|-------------------------------|-------------------------------|--------------------------------------------|-------------------------------|--------------------------------|--------------------------------------------|------------------|
| Observational management                   |                               | 0.63 (0.40,1.02)              | 1.39 (0.49,4.16)              | 0.90 (0.24,3.42)                           | 0.63 (0.29,1.31)              | 0.52 (0.22,1.19)               | 0.13 (0.00*,3.59)                          | 1.37 (0.28,6.89) |
| Prostatectomy                              | <sup>2</sup> 0.60 (0.37,0.98) |                               | 2.20 (0.82,6.37)              | 1.42 (0.39,5.19)                           | 0.99 (0.42,2.26)              | 0.83 (0.32,2.00)               | 0.20 (0.00*,6.07)                          | 2.16 (0.46,10.9) |
| Conventional radiotherapy                  | -                             | <sup>1</sup> 1.65 (0.53,5.44) |                               | 0.64 (0.29,1.41)                           | 0.45 (0.14,1.30)              | 0.38 (0.12,1.06)               | 0.09 (0.00*,3.08)                          | 0.98 (0.28,3.35) |
| Conventional radiotherapy-hypofractionated | -                             | -                             | <sup>2</sup> 0.65 (0.28,1.43) |                                            | 0.70 (0.18,2.65)              | 0.59 (0.15,2.16)               | 0.14 (0.00*,5.08)                          | 1.51 (0.36,6.54) |
| Conformal LD radiotherapy                  | <sup>1</sup> 0.70 (0.31,1.57) | -                             | -                             | -                                          |                               | 0.84 (0.52,1.30)               | 0.20 (0.00*,5.73)                          | 2.20 (0.44,11.4) |
| Conformal HD radiotherapy                  | -                             | -                             | <sup>1</sup> 0.21 (0.03,0.97) | -                                          | <sup>5</sup> 0.86 (0.53,1.37) |                                | 0.25 (0.00*,6.79)                          | 2.61 (0.53,14.1) |
| Conformal LD radiotherapy-hypofractionated | -                             | -                             | -                             | -                                          | -                             | <sup>2</sup> 0.22 (0.00*,6.85) |                                            | 11.2 (0.24,5542) |
| Cryotherapy                                | -                             | -                             | <sup>2</sup> 0.96 (0.27,3.46) | -                                          | -                             | -                              | -                                          |                  |

LD: low dose; HD: high dose.

\* Odds ratio was less than 0.005.

Lower-left results compare row-defining interventions against column-defining interventions. Upper-right results compare column-defining interventions against row-defining interventions.

In the meta-analysis of direct comparisons (reported in lower-left triangle), between-trial heterogeneity  $\tau^2$  was estimated as 0.02 (95% interval 0.001 to 0.31).

In the network meta-analysis (reported in upper-right triangle), between-trial heterogeneity  $\tau^2$  was estimated as 0.02 (95% interval 0.001 to 0.29).

The small superscript numbers in the cells of lower-left triangle indicate the numbers of randomized trials which compared the two interventions directly.

**Table 4.** Adverse gastrointestinal events: odds ratios (posterior mean with 95% intervals) for each pair-wise comparison of interventions, based on direct evidence alone (lower-left triangle) or direct and indirect evidence (upper-right triangle).

| Intervention                               | Observational management         | Prostatectomy | Conventional radiotherapy        | Conventional radiotherapy-hypofractionated | Conformal LD radiotherapy        | Conformal HD radiotherapy        | Conformal LD radiotherapy-hypofractionated | Cryotherapy      |
|--------------------------------------------|----------------------------------|---------------|----------------------------------|--------------------------------------------|----------------------------------|----------------------------------|--------------------------------------------|------------------|
| Observational management                   |                                  | -             | -                                | -                                          | -                                | -                                | -                                          | -                |
| Prostatectomy                              | <sup>2</sup> 0.84<br>(0.33,1.88) |               | -                                | -                                          | -                                | -                                | -                                          | -                |
| Conventional radiotherapy                  | -                                | -             |                                  | 1.01 (0.19,5.29)                           | 0.72 (0.29,1.59)                 | 1.42 (0.57,3.39)                 | 1.26 (0.35,4.30)                           | 0.17 (0.04,0.51) |
| Conventional radiotherapy-hypofractionated | -                                | -             | <sup>1</sup> 1.00<br>(0.22,4.56) |                                            | 0.70 (0.11,4.37)                 | 1.40 (0.21,9.02)                 | 1.24 (0.15,9.76)                           | 0.17 (0.02,1.19) |
| Conformal LD radiotherapy                  | -                                | -             | <sup>2</sup> 0.46<br>(0.17,1.16) | -                                          |                                  | 1.98 (1.18,3.59)                 | 1.77 (0.63,5.11)                           | 0.24 (0.05,0.96) |
| Conformal HD radiotherapy                  | -                                | -             | <sup>1</sup> 2.66<br>(0.85,8.62) | -                                          | <sup>5</sup> 1.73<br>(1.07,2.97) |                                  | 0.89 (0.36,2.15)                           | 0.12 (0.02,0.48) |
| Conformal LD radiotherapy-hypofractionated | -                                | -             | -                                | -                                          | -                                | <sup>3</sup> 0.89<br>(0.39,1.96) |                                            | 0.14 (0.02,0.70) |
| Cryotherapy                                | -                                | -             | <sup>2</sup> 0.18<br>(0.05,0.50) | -                                          | -                                | -                                | -                                          |                  |

LD: low dose; HD: high dose.

Lower-left results compare row-defining interventions against column-defining interventions. Upper-right results compare column-defining interventions against row-defining interventions.

The comparison of prostatectomy with observational management was not linked to the rest of the network, so this evidence was included in the meta-analysis of direct comparisons only.

In the meta-analysis of direct comparisons (reported in lower-left triangle), between-trial heterogeneity  $\tau^2$  was estimated as 0.14 (95% interval 0.01 to 0.97). In the network meta-analysis (reported in upper-right triangle), between-trial heterogeneity  $\tau^2$  was estimated as 0.24 (95% interval 0.02 to 1.23).

The small superscript numbers in the cells of lower-left triangle indicate the numbers of randomized trials which compared the two interventions directly.



**Table 5.** Adverse genitourinary events: odds ratios (posterior mean with 95% intervals) for each pair-wise comparison of interventions, based on direct evidence alone (lower-left triangle) or direct and indirect evidence (upper-right triangle).

| Intervention                               | Observational management      | Prostatectomy | Conventional radiotherapy     | Conventional radiotherapy-hypofractionated | Conformal LD radiotherapy     | Conformal HD radiotherapy     | Conformal LD radiotherapy-hypofractionated | Cryotherapy      |
|--------------------------------------------|-------------------------------|---------------|-------------------------------|--------------------------------------------|-------------------------------|-------------------------------|--------------------------------------------|------------------|
| Observational management                   |                               | -             | -                             | -                                          | -                             | -                             | -                                          | -                |
| Prostatectomy                              | <sup>2</sup> 2.27 (1.34,3.90) |               | -                             | -                                          | -                             | -                             | -                                          | -                |
| Conventional radiotherapy                  | -                             | -             |                               | 1.00 (0.34,2.90)                           | 0.91 (0.54,1.51)              | 1.19 (0.69,2.11)              | 1.41 (0.49,4.07)                           | 0.66 (0.22,2.00) |
| Conventional radiotherapy-hypofractionated | -                             | -             | <sup>1</sup> 1.01 (0.34,3.00) |                                            | 0.90 (0.27,2.97)              | 1.19 (0.36,4.04)              | 1.41 (0.31,6.44)                           | 0.66 (0.14,3.04) |
| Conformal LD radiotherapy                  | -                             | -             | <sup>2</sup> 0.80 (0.43,1.51) | -                                          |                               | 1.32 (0.97,1.86)              | 1.56 (0.61,4.09)                           | 0.73 (0.21,2.52) |
| Conformal HD radiotherapy                  | -                             | -             | <sup>1</sup> 1.53 (0.62,3.82) | -                                          | <sup>5</sup> 1.28 (0.93,1.86) |                               | 1.18 (0.48,2.92)                           | 0.55 (0.16,1.91) |
| Conformal LD radiotherapy-hypofractionated | -                             | -             | -                             | -                                          | -                             | <sup>2</sup> 1.17 (0.48,2.91) |                                            | 0.47 (0.10,2.15) |
| Cryotherapy                                | -                             | -             | <sup>2</sup> 0.68 (0.22,2.03) | -                                          | -                             | -                             | -                                          |                  |

LD: low dose; HD: high dose.

Lower-left results compare row-defining interventions against column-defining interventions. Upper-right results compare column-defining interventions against row-defining interventions.

The comparison of prostatectomy with observational management was not linked to the rest of the network, so this evidence was included in the meta-analysis of direct comparisons only.

In the meta-analysis of direct comparisons (reported in lower-left triangle), between-trial heterogeneity  $\tau^2$  was estimated as 0.04 (95% interval 0.003 to 0.29). In the network meta-analysis (reported in upper-right triangle), between-trial heterogeneity  $\tau^2$  was estimated as 0.04 (95% interval 0.002 to 0.26).

The small superscript numbers in the cells of lower-left triangle indicate the numbers of randomized trials which compared the two interventions directly.

## DISCUSSION

Using network meta-analysis, we were able to combine simultaneously all relevant evidence on treating patients with localized prostate cancer, even in the absence of direct comparative evidence for some treatment pairs, encompassing four efficacy and safety outcomes. Based on data from 21 trials including 7,350 patients randomly assigned among eight different intervention regimes for localized prostate cancer, we found substantial uncertainty about the relative efficacy and safety of different interventions in respect of the studied outcomes.

Assumptions of consistency between direct and indirect evidence were tested to justify the joint synthesis of all studies; however, these tests had little power due to the relatively small number of trials available in most direct comparisons. Instead we must rely on judgements about the similarity of studies included in the analysis in aspects such as patient groups, outcome measures and study methodology. Although we defined the population of interest as patients with localized prostate cancer, there was heterogeneity between individual study populations in terms of the severity of disease. Some of the trials were conducted several decades ago, when surgery and radiology techniques may have been different, and we observed that stage migration has occurred in men diagnosed with prostate cancer, due to emerging bio-marker and image technologies. Furthermore, some of the trials used adjuvant therapy, although this was applied in all the arms within the trial.

Two further limitations warrant mention. Literature searches were completed in September of 2012. However, the results of one of the most important randomized trials – ProtecT study<sup>13</sup> – has not been published so far, and to our knowledge there are no other new relevant RCTs have been reported after this systematic review. Our choices of measurements may have favoured some treatments over others: for example the RTOG scale had been used to define the late gastrointestinal and late genitourinary toxicity in the included studies, but it

1  
2  
3 does not measure incontinence which could be the most common adverse event post-  
4  
5 prostatectomy.<sup>102</sup>  
6  
7

8  
9 Methodologically, we used informative prior distributions based on external evidence for  
10  
11 heterogeneity variances, to increase precision in their estimation and improve estimation of  
12  
13 treatment differences. Data-based informative priors have previously been considered by Lu  
14  
15 & Ades,<sup>101</sup> who used them for the between-study correlation structure. To our knowledge,  
16  
17 our paper is the first application of network meta-analysis incorporating data-based  
18  
19 informative priors for between-study heterogeneity.  
20  
21

22  
23 Our findings have implications for research funding prioritisation and study design; and for  
24  
25 clinical practice. The study identified particular 'weak links' in the network of comparative  
26  
27 treatment options, which might be prioritized for future investment in randomized controlled  
28  
29 trials. This is particularly the case for studies comparing HIFU (which currently is bereft of  
30  
31 any comparative evidence) or brachytherapy against other treatment options, and also for  
32  
33 trials examining the comparative efficacy and safety of prostatectomy versus conformal  
34  
35 radiotherapy modalities. For clinicians, and for men diagnosed with prostate cancer, our  
36  
37 findings highlight that the optimal treatment options may be different in respect of different  
38  
39 outcomes: patients need to be given appropriate information about the uncertainty  
40  
41 surrounding treatment choice currently, and be allowed to opt for 'trade-offs' between  
42  
43 efficacy and safety outcomes as they judge appropriately.<sup>95</sup> Observational studies have  
44  
45 consistently shown that radical prostatectomy has better cause-specific mortality outcomes  
46  
47 compared with radiotherapy.<sup>96-99,103</sup>  
48  
49

50  
51  
52 In conclusion, clinically important information from high quality randomized trials is still  
53  
54 needed to inform decision making regarding primary treatment options for men with localized  
55  
56 prostate cancer. The findings of this study highlight the importance of informed patient  
57  
58 choice and shared-decision making about treatment modality and acceptable trade-offs  
59  
60

1  
2  
3 between multiple outcomes. The upcoming results of the ProtecT study,<sup>13</sup> which is  
4 evaluating effectiveness of multiple therapies in men with PSA-detected localized prostate  
5 cancer, together with other treatment studies in progress, will hopefully contribute to the  
6 evidence base. It is however unlikely that evidential uncertainty about all relevant and  
7 important outcomes will be resolved by these trials, and an updated network meta-analysis  
8 incorporating new evidence may be useful to synthesize the new with the existing evidence.  
9 We demonstrate a high degree of uncertainty about treatment superiority in the management  
10 of localized prostate cancer. Clinicians and patients need to grapple with this uncertainty in  
11 the context of shared-decision making.  
12  
13  
14  
15  
16  
17  
18  
19  
20  
21  
22  
23  
24  
25  
26  
27  
28  
29  
30  
31  
32  
33  
34  
35  
36  
37  
38  
39  
40  
41  
42  
43  
44  
45  
46  
47  
48  
49  
50  
51  
52  
53  
54  
55  
56  
57  
58  
59  
60

1  
2  
3 **Funding and Financial Disclosure:** TX was funded by the National Institute for Health  
4 Research Health Technology Assessment (NIHR HTA) program (HTA 96/20/99). RT was  
5 supported by Medical Research council grant U105285807. GL was supported by a Post-  
6 Doctoral Fellowship Award of the National Institute for Health Research (PDF-2011-04-047).  
7 The funders had no role in study design, data collection and analysis, decision to publish, or  
8 preparation of the manuscript.  
9  
10  
11

12  
13 **Author Contributions:** TX, RT, GL, and JH conceived and designed the study. TX  
14 performed the literature searches. TX, RT, YW, GL, and JH performed the literature review  
15 and data extraction. TX, RT, YW, GL, and JH analyzed the data. TX wrote the first draft of  
16 the manuscript. TX, RT, YW, DN, GL, and JH contributed to the writing of the manuscript.  
17  
18  
19

20  
21 **Competing Interests:** The authors declare that no competing interests exist.  
22  
23

24 **Data Sharing Statement:** Not additional data  
25  
26  
27  
28  
29  
30  
31  
32  
33  
34  
35  
36  
37  
38  
39  
40  
41  
42  
43  
44  
45  
46  
47  
48  
49  
50  
51  
52  
53  
54  
55  
56  
57  
58  
59  
60

## REFERENCES

1. Jemal A, Bray F, Center MM, et al. Global cancer statistics. *CA Cancer J Clin*. Mar-Apr 2011;61(2):69-90.
2. Ferlay J, Shin HR, Bray F, et al. *GLOBOCAN 2008 v1.2, Cancer Incidence and Mortality Worldwide: IARC CancerBase No.10*. Lyon, France: International Agency for Research on Cancer; 2010. Available from: <http://globocan.iarc.fr>, accessed on 08 Aug 2011.
3. Cancer Research UK. Prostate cancer - UK incidence statistics. <http://info.cancerresearchuk.org/cancerstats/types/prostate/incidence/>. Accessed 08 Aug, 2011.
4. Howlader N, Noone AM, Krapcho M, et al. SEER Cancer Statistics Review, 1975-2008, National Cancer Institute. Bethesda, MD, [http://seer.cancer.gov/csr/1975\\_2008/](http://seer.cancer.gov/csr/1975_2008/), based on November 2010 SEER data submission, posted to the SEER web site. 2011.
5. National Cancer Institute. Prostate Cancer. <http://www.cancer.gov/cancertopics/types/prostate>. Accessed 08 Aug, 2011.
6. National Cancer Institute. Cancer advances in focus - prostate cancer. <http://www.cancer.gov/cancertopics/factsheet/cancer-advances-in-focus/prostate>. Accessed 08 Aug, 2011.
7. Lyratzopoulos G, Barbiere JM, Greenberg DC, et al. Population based time trends and socioeconomic variation in use of radiotherapy and radical surgery for prostate cancer in a UK region: continuous survey. *BMJ*. 2010;340:c1928.
8. *National Collaborating Centre for Cancer. NICE clinical guideline 58. Prostate cancer: diagnosis and treatment. Evidence review*. London: National Institute for Health and Clinical Excellence; 2008.
9. Heidenreich A, Bastian PJ, Bellmunt J, et al. *Guidelines on prostate cancer*: European Association of Urology; 2012.
10. Thompson I, Thrasher JB, Aus G, et al. *Guideline for the Management of Clinically Localized Prostate Cancer: 2007 Update*.: American Urological Association; 2011.
11. Andersson SO, Andren O, Lyth J, et al. Managing localized prostate cancer by radical prostatectomy or watchful waiting: Cost analysis of a randomized trial (SPCG-4). *Scand J Urol Nephrol*. Apr 2011;45(3):177-183.
12. Wilt TJ, Brawer MK, Barry MJ, et al. The Prostate cancer Intervention Versus Observation Trial:VA/NCI/AHRQ Cooperative Studies Program #407 (PIVOT): design and baseline results of a randomized controlled trial comparing radical prostatectomy to watchful waiting for men with clinically localized prostate cancer. *Contemp Clin Trials*. Jan 2009;30(1):81-87.
13. Donovan J, Mills N, Smith M, et al. Quality improvement report: Improving design and conduct of randomised trials by embedding them in qualitative research: ProtecT (prostate testing for cancer and treatment) study. Commentary: presenting unbiased information to patients can be difficult. *BMJ*. Oct 5 2002;325(7367):766-770.

- 1  
2  
3 14. Caldwell DM, Ades AE, Higgins JP. Simultaneous comparison of multiple treatments:  
4 combining direct and indirect evidence. *BMJ*. Oct 15 2005;331(7521):897-900.  
5  
6 15. Lu G, Ades AE. Combination of direct and indirect evidence in mixed treatment  
7 comparisons. *Stat Med*. Oct 30 2004;23(20):3105-3124.  
8  
9 16. Salanti G, Higgins JP, Ades AE, et al. Evaluation of networks of randomized trials.  
10 *Stat Methods Med Res*. Jun 2008;17(3):279-301.  
11  
12 17. Higgins JPT, Green S. *Cochrane Handbook for Systematic Reviews of Interventions*  
13 *Version 5.1.0 [updated March 2011]*. The Cochrane Collaboration. Available from  
14 www.cochrane-handbook.org.; 2011.  
15  
16 18. Higgins JP, Altman DG, Gotzsche PC, Juni P, Moher D, Oxman AD, Savovic J,  
17 Schulz KF, Weeks L, Sterne JA. The Cochrane Collaboration's tool for assessing risk  
18 of bias in randomised trials. *BMJ*. 2011;343:d5928.  
19  
20 19. Pilepich MV, Krall JM, Sause WT, et al. Correlation of radiotherapeutic parameters  
21 and treatment related morbidity in carcinoma of the prostate--analysis of RTOG study  
22 75-06. *Int J Radiat Oncol Biol Phys*. Mar 1987;13(3):351-357.  
23  
24 20. Nielsen ME, Makarov DV, Humphreys E, et al. Is it possible to compare PSA  
25 recurrence-free survival after surgery and radiotherapy using revised ASTRO  
26 criterion--"nadir + 2"? *Urology*. Aug 2008;72(2):389-393; discussion 394-385.  
27  
28 21. Smith TC, Spiegelhalter DJ, Thomas A. Bayesian approaches to random-effects  
29 meta-analysis: a comparative study. *Stat Med*. Dec 30 1995;14(24):2685-2699.  
30  
31 22. Dias S, Welton NJ, Sutton AJ, et al. NICE DSU Technical Support Document 2: A  
32 Generalised Linear Modelling Framework for Pairwise and Network Meta-Analysis of  
33 Randomised Controlled Trials. 2011; <http://www.nicedsu.org.uk>. Accessed April,  
34 2012.  
35  
36 23. Lunn DJ, Thomas A, Best N, et al. WinBUGS - A Bayesian modelling framework:  
37 Concepts, structure, and extensibility. *Stat Comput*. Oct 2000;10(4):325-337.  
38  
39 24. Turner RM, Davey J, Clarke MJ, et al. Predicting the extent of heterogeneity in meta-  
40 analysis, using empirical data from the Cochrane Database of Systematic Reviews.  
41 *International Journal of Epidemiology*. in press.  
42  
43 25. Salanti G, Ades AE, Ioannidis JP. Graphical methods and numerical summaries for  
44 presenting results from multiple-treatment meta-analysis: an overview and tutorial. *J*  
45 *Clin Epidemiol*. Feb 2011;64(2):163-171.  
46  
47 26. Akakura K, Suzuki H, Ichikawa T, et al. A randomized trial comparing radical  
48 prostatectomy plus endocrine therapy versus external beam radiotherapy plus  
49 endocrine therapy for locally advanced prostate cancer: results at median follow-up  
50 of 102 months. *Jpn J Clin Oncol*. Dec 2006;36(12):789-793.  
51  
52 27. Bill-Axelson A, Holmberg L, Ruutu M, et al. Radical prostatectomy versus watchful  
53 waiting in early prostate cancer. *N Engl J Med*. May 12 2005;352(19):1977-1984.  
54  
55 28. Chin JL, Ng CK, Touma NJ, et al. Randomized trial comparing cryoablation and  
56 external beam radiotherapy for T2C-T3B prostate cancer. *Prostate Cancer Prostatic*  
57 *Dis*. 2008;11(1):40-45.  
58  
59  
60



- 1  
2  
3 29. Dearnaley DP, Hall E, Lawrence D, et al. Phase III pilot study of dose escalation  
4 using conformal radiotherapy in prostate cancer: PSA control and side effects. *Br J*  
5 *Cancer*. Feb 14 2005;92(3):488-498.  
6  
7 30. Dearnaley DP, Khoo VS, Norman AR, et al. Comparison of radiation side-effects of  
8 conformal and conventional radiotherapy in prostate cancer: a randomised trial.  
9 *Lancet*. Jan 23 1999;353(9149):267-272.  
10  
11 31. Dearnaley DP, Sydes MR, Graham JD, et al. Escalated-dose versus standard-dose  
12 conformal radiotherapy in prostate cancer: first results from the MRC RT01  
13 randomised controlled trial. *Lancet Oncol*. Jun 2007;8(6):475-487.  
14  
15 32. Dearnaley DP, Sydes MR, Langley RE, et al. The early toxicity of escalated versus  
16 standard dose conformal radiotherapy with neo-adjuvant androgen suppression for  
17 patients with localised prostate cancer: results from the MRC RT01 trial  
18 (ISRCTN47772397). *Radiother Oncol*. Apr 2007;83(1):31-41.  
19  
20 33. Donnelly B, Saliken J, Brasher P, et al. Randomized Trial of External Beam  
21 Radiotherapy Versus Cryoablation in Patients with Localized Prostate Cancer. The  
22 American Urological Association Annual Meeting. Abstract 1141. 2007.  
23  
24 34. Graverson PH, Nielsen KT, Gasser TC, et al. Radical prostatectomy versus  
25 expectant primary treatment in stages I and II prostatic cancer. A fifteen-year follow-  
26 up. *Urology*. Dec 1990;36(6):493-498.  
27  
28 35. Koper PC, Jansen P, van Putten W, et al. Gastro-intestinal and genito-urinary  
29 morbidity after 3D conformal radiotherapy of prostate cancer: observations of a  
30 randomized trial. *Radiother Oncol*. Oct 2004;73(1):1-9.  
31  
32 36. Koper PC, Stroom JC, van Putten WL, et al. Acute morbidity reduction using 3DCRT  
33 for prostate carcinoma: a randomized study. *Int J Radiat Oncol Biol Phys*. Mar 1  
34 1999;43(4):727-734.  
35  
36 37. Lukka H, Hayter C, Julian JA, et al. Randomized trial comparing two fractionation  
37 schedules for patients with localized prostate cancer. *J Clin Oncol*. Sep 1  
38 2005;23(25):6132-6138.  
39  
40 38. Paulson DF, Lin GH, Hinshaw W, et al. Radical surgery versus radiotherapy for  
41 adenocarcinoma of the prostate. *J Urol*. Sep 1982;128(3):502-504.  
42  
43 39. Peeters ST, Heemsbergen WD, Koper PC, et al. Dose-response in radiotherapy for  
44 localized prostate cancer: results of the Dutch multicenter randomized phase III trial  
45 comparing 68 Gy of radiotherapy with 78 Gy. *J Clin Oncol*. May 1 2006;24(13):1990-  
46 1996.  
47  
48 40. Pollack A, Hanlon AL, Horwitz EM, et al. Dosimetry and preliminary acute toxicity in  
49 the first 100 men treated for prostate cancer on a randomized hypofractionation dose  
50 escalation trial. *Int J Radiat Oncol Biol Phys*. Feb 1 2006;64(2):518-526.  
51  
52 41. Pollack A, Zagars GK, Starkschall G, et al. Prostate cancer radiation dose response:  
53 results of the M. D. Anderson phase III randomized trial. *Int J Radiat Oncol Biol Phys*.  
54 Aug 1 2002;53(5):1097-1105.  
55  
56 42. Steineck G, Helgesen F, Adolfsson J, et al. Quality of life after radical prostatectomy  
57 or watchful waiting. *N Engl J Med*. Sep 12 2002;347(11):790-796.  
58  
59  
60



- 1
- 2
- 3 **43.** Storey MR, Pollack A, Zagars G, et al. Complications from radiotherapy dose
- 4 escalation in prostate cancer: preliminary results of a randomized trial. *Int J Radiat*
- 5 *Oncol Biol Phys.* Oct 1 2000;48(3):635-642.
- 6
- 7 **44.** Tait DM, Nahum AE, Meyer LC et al. Acute toxicity in pelvic radiotherapy; a
- 8 randomised trial of conformal versus conventional treatment. *Radiother Oncol.* Feb
- 9 1997;42(2):121-136.
- 10
- 11 **45.** Yeoh EE, Fraser RJ, McGowan RE, et al. Evidence for efficacy without increased
- 12 toxicity of hypofractionated radiotherapy for prostate carcinoma: early results of a
- 13 Phase III randomized trial. *Int J Radiat Oncol Biol Phys.* Mar 15 2003;55(4):943-955.
- 14
- 15 **46.** Al-Mamgani A, van Putten WL, Heemsbergen WD, et al. Update of Dutch multicenter
- 16 dose-escalation trial of radiotherapy for localized prostate cancer. *Int J Radiat Oncol*
- 17 *Biol Phys.* Nov 15 2008;72(4):980-988.
- 18
- 19 **47.** Al-Mamgani A, van Putten WL, van der Wielen GJ, et al. Dose escalation and quality
- 20 of life in patients with localized prostate cancer treated with radiotherapy: long-term
- 21 results of the Dutch randomized dose-escalation trial (CKTO 96-10 trial). *Int J Radiat*
- 22 *Oncol Biol Phys.* Mar 15 2011;79(4):1004-1012.
- 23
- 24 **48.** Arcangeli G, Fowler J, Gomellini S, et al. Acute and late toxicity in a randomized trial
- 25 of conventional versus hypofractionated three-dimensional conformal radiotherapy
- 26 for prostate cancer. *Int J Radiat Oncol Biol Phys.* Mar 15 2011;79(4):1013-1021.
- 27
- 28 **49.** Arcangeli G, Saracino B, Gomellini S, et al. A prospective phase III randomized trial
- 29 of hypofractionation versus conventional fractionation in patients with high-risk
- 30 prostate cancer. *Int J Radiat Oncol Biol Phys.* Sep 1 2010;78(1):11-18.
- 31
- 32 **50.** Beckendorf V, Guerif S, Le Prise E, et al. 70 Gy versus 80 Gy in localized prostate
- 33 cancer: 5-year results of GETUG 06 randomized trial. *Int J Radiat Oncol Biol Phys.*
- 34 Jul 15 2011;80(4):1056-1063.
- 35
- 36 **51.** Beckendorf V, Guerif S, Le Prise E, et al. The GETUG 70 Gy vs. 80 Gy randomized
- 37 trial for localized prostate cancer: feasibility and acute toxicity. *Int J Radiat Oncol Biol*
- 38 *Phys.* Nov 15 2004;60(4):1056-1065.
- 39
- 40 **52.** Bill-Axelson A, Holmberg L, Filen F, et al. Radical prostatectomy versus watchful
- 41 waiting in localized prostate cancer: the Scandinavian prostate cancer group-4
- 42 randomized trial. *J Natl Cancer Inst.* Aug 20 2008;100(16):1144-1154.
- 43
- 44 **53.** Bill-Axelson A, Holmberg L, Ruutu M, et al. Radical prostatectomy versus watchful
- 45 waiting in early prostate cancer. *N Engl J Med.* May 5 2011;364(18):1708-1717.
- 46
- 47 **54.** Dearnaley D, Syndikus I, Sumo G, et al. Conventional versus hypofractionated high-
- 48 dose intensity-modulated radiotherapy for prostate cancer: preliminary safety results
- 49 from the CHHiP randomised controlled trial. *Lancet Oncol.* Jan 2012;13(1):43-54.
- 50
- 51 **55.** Donnelly BJ, Saliken JC, Brasher PM, et al. A randomized trial of external beam
- 52 radiotherapy versus cryoablation in patients with localized prostate cancer. *Cancer.*
- 53 Jan 15 2010;116(2):323-330.
- 54
- 55 **56.** Giberti C, Chiono L, Gallo F, et al. Radical retropubic prostatectomy versus
- 56 brachytherapy for low-risk prostatic cancer: a prospective study. *World J Urol.* Oct
- 57 2009;27(5):607-612.
- 58
- 59
- 60

- 1  
2  
3 57. Heemsbergen WD, Hoogeman MS, Witte MG, et al. Increased risk of biochemical  
4 and clinical failure for prostate patients with a large rectum at radiotherapy planning:  
5 results from the Dutch trial of 68 Gy versus 78 Gy. *Int J Radiat Oncol Biol Phys*. Apr  
6 1 2007;67(5):1418-1424.  
7
- 8 58. Johansson E, Bill-Axelsson A, Holmberg L, et al. Time, symptom burden, androgen  
9 deprivation, and self-assessed quality of life after radical prostatectomy or watchful  
10 waiting: the Randomized Scandinavian Prostate Cancer Group Study Number 4  
11 (SPCG-4) clinical trial. *Eur Urol*. Feb 2009;55(2):422-430.  
12
- 13 59. Johansson E, Steineck G, Holmberg L, et al. Long-term quality-of-life outcomes after  
14 radical prostatectomy or watchful waiting: the Scandinavian Prostate Cancer Group-4  
15 randomised trial. *Lancet Oncol*. Sep 2011;12(9):891-899.  
16
- 17 60. Kuban DA, Levy LB, Cheung MR, et al. Long-term failure patterns and survival in a  
18 randomized dose-escalation trial for prostate cancer. Who dies of disease? *Int J*  
19 *Radiat Oncol Biol Phys*. Apr 1 2011;79(5):1310-1317.  
20
- 21 61. Kuban DA, Tucker SL, Dong L, et al. Long-term results of the M. D. Anderson  
22 randomized dose-escalation trial for prostate cancer. *Int J Radiat Oncol Biol Phys*.  
23 Jan 1 2008;70(1):67-74.  
24
- 25 62. Marzi S, Saracino B, Petrongari MG, et al. Modeling of alpha/beta for late rectal  
26 toxicity from a randomized phase II study: conventional versus hypofractionated  
27 scheme for localized prostate cancer. *J Exp Clin Cancer Res*. 2009;28:117.  
28
- 29 63. Norkus D, Miller A, Kurtinaitis J, et al. A randomized trial comparing hypofractionated  
30 and conventionally fractionated three-dimensional external-beam radiotherapy for  
31 localized prostate adenocarcinoma : a report on acute toxicity. *Strahlenther Onkol*.  
32 Nov 2009;185(11):715-721.  
33
- 34 64. Norkus D, Miller A, Plieskiene A, et al. A randomized trial comparing  
35 hypofractionated and conventionally fractionated three-dimensional conformal  
36 external-beam radiotherapy for localized prostate adenocarcinoma: a report on the  
37 first-year biochemical response. *Medicina (Kaunas)*. 2009;45(6):469-475.  
38
- 39 65. Peeters ST, Heemsbergen WD, van Putten WL, et al. Acute and late complications  
40 after radiotherapy for prostate cancer: results of a multicenter randomized trial  
41 comparing 68 Gy to 78 Gy. *Int J Radiat Oncol Biol Phys*. Mar 15 2005;61(4):1019-  
42 1034.  
43
- 44 66. Peeters ST, Lebesque JV, Heemsbergen WD, et al. Localized volume effects for late  
45 rectal and anal toxicity after radiotherapy for prostate cancer. *Int J Radiat Oncol Biol*  
46 *Phys*. Mar 15 2006;64(4):1151-1161.  
47
- 48 67. Robinson JW, Donnelly BJ, Siever JE, et al. A randomized trial of external beam  
49 radiotherapy versus cryoablation in patients with localized prostate cancer: quality of  
50 life outcomes. *Cancer*. Oct 15 2009;115(20):4695-4704.  
51
- 52 68. Syndikus I, Morgan RC, Sydes MR, et al. Late gastrointestinal toxicity after dose-  
53 escalated conformal radiotherapy for early prostate cancer: results from the UK  
54 Medical Research Council RT01 trial (ISRCTN47772397). *Int J Radiat Oncol Biol*  
55 *Phys*. Jul 1 2010;77(3):773-783.  
56  
57  
58  
59  
60

- 1  
2  
3 **69.** van der Wielen GJ, Hoogeman MS, Dohle GR, et al. Dose-volume parameters of the  
4 corpora cavernosa do not correlate with erectile dysfunction after external beam  
5 radiotherapy for prostate cancer: results from a dose-escalation trial. *Int J Radiat*  
6 *Oncol Biol Phys.* Jul 1 2008;71(3):795-800.  
7  
8 **70.** Wilt TJ, Brawer MK, Jones KM, et al. Radical prostatectomy versus observation for  
9 localized prostate cancer. *N Engl J Med.* Jul 19 2012;367(3):203-213.  
10  
11 **71.** Yeoh EE, Botten RJ, Butters J, et al. Hypofractionated versus conventionally  
12 fractionated radiotherapy for prostate carcinoma: final results of phase III randomized  
13 trial. *Int J Radiat Oncol Biol Phys.* Dec 1 2011;81(5):1271-1278.  
14  
15 **72.** Yeoh EE, Holloway RH, Fraser RJ, et al. Hypofractionated versus conventionally  
16 fractionated radiation therapy for prostate carcinoma: updated results of a phase III  
17 randomized trial. *Int J Radiat Oncol Biol Phys.* Nov 15 2006;66(4):1072-1083.  
18  
19 **73.** Yeoh EK, Holloway RH, Fraser RJ, et al Anorectal function after three- versus two-  
20 dimensional radiation therapy for carcinoma of the prostate. *Int J Radiat Oncol Biol*  
21 *Phys.* Jan 1 2009;73(1):46-52.  
22  
23 **74.** Zietman AL, Bae K, Slater JD, et al. Randomized trial comparing conventional-dose  
24 with high-dose conformal radiation therapy in early-stage adenocarcinoma of the  
25 prostate: long-term results from proton radiation oncology group/american college of  
26 radiology 95-09. *J Clin Oncol.* Mar 1 2010;28(7):1106-1111.  
27  
28 **75.** Zietman AL, DeSilvio ML, Slater JD, et al. Comparison of conventional-dose vs high-  
29 dose conformal radiation therapy in clinically localized adenocarcinoma of the  
30 prostate: a randomized controlled trial. *JAMA.* Sep 14 2005;294(10):1233-1239.  
31  
32 **76.** Widmark A. Prospective Randomized Trial Comparing External Beam Radiotherapy  
33 versus Watchful Waiting in Early Prostate Cancer (T1b-T2, pN0, Grade 1-2, M0).  
34 2011 annual meeting of the American Society for Therapeutic Radiology And  
35 Oncology, ASTRO.  
36 <http://www.oncolink.org/conferences/article.cfm?id=2171&ss=350>. 2011.  
37  
38 **77.** Fransson P, Damber JE, Tomic R, et al. Quality of life and symptoms in a  
39 randomized trial of radiotherapy versus deferred treatment of localized prostate  
40 carcinoma. *Cancer.* Dec 15 2001;92(12):3111-3119.  
41  
42 **78.** Fransson P, Damber JE, Widmark A. Health-related quality of life 10 years after  
43 external beam radiotherapy or watchful waiting in patients with localized prostate  
44 cancer. *Scand J Urol Nephrol.* 2009;43(2):119-126.  
45  
46 **79.** Bannuru RR, Dvorak T, Obadan N, et al. Comparative evaluation of radiation  
47 treatments for clinically localized prostate cancer: an updated systematic review. *Ann*  
48 *Intern Med.* Aug 2 2011;155(3):171-178.  
49  
50 **80.** Hegarty J, Beirne PV, Walsh E, et al. Radical prostatectomy versus watchful waiting  
51 for prostate cancer. *Cochrane Database Syst Rev.* 2010;11:CD006590.  
52  
53 **81.** Hummel S, Simpson EL, Hemingway P, et al. Intensity-modulated radiotherapy for  
54 the treatment of prostate cancer: a systematic review and economic evaluation.  
55 *Health Technol Assess.* Oct 2010;14(47):1-108, iii-iv.  
56  
57  
58  
59  
60

- 1  
2  
3  
4  
5  
6  
7  
8  
9  
10  
11  
12  
13  
14  
15  
16  
17  
18  
19  
20  
21  
22  
23  
24  
25  
26  
27  
28  
29  
30  
31  
32  
33  
34  
35  
36  
37  
38  
39  
40  
41  
42  
43  
44  
45  
46  
47  
48  
49  
50  
51  
52  
53  
54  
55  
56  
57  
58  
59  
60
82. Koukourakis G, Kelekis N, Armonis V, et al. Brachytherapy for prostate cancer: a systematic review. *Adv Urol*. 2009;327945.
83. Morris DE, Emami B, Mauch PM, et al. Evidence-based review of three-dimensional conformal radiotherapy for localized prostate cancer: an ASTRO outcomes initiative. *Int J Radiat Oncol Biol Phys*. May 1 2005;62(1):3-19.
84. Olsen DR, Bruland OS, Frykholm G, et al. Proton therapy - a systematic review of clinical effectiveness. *Radiother Oncol*. May 2007;83(2):123-132.
85. Pasquier D, Ballereau C. Adjuvant and salvage radiotherapy after prostatectomy for prostate cancer: a literature review. *Int J Radiat Oncol Biol Phys*. Nov 15 2008;72(4):972-979.
86. Peinemann F, Grouven U, Bartel C, Sauerland S, et al. Permanent interstitial low-dose-rate brachytherapy for patients with localised prostate cancer: a systematic review of randomised and nonrandomised controlled clinical trials. *Eur Urol*. Nov 2011;60(5):881-893.
87. Peinemann F, Grouven U, Hemkens LG, et al. Low-dose rate brachytherapy for men with localized prostate cancer. *Cochrane Database Syst Rev*. 2011(7):CD008871.
88. Pieters BR, de Back DZ, Koning CC, et al. Comparison of three radiotherapy modalities on biochemical control and overall survival for the treatment of prostate cancer: a systematic review. *Radiother Oncol*. Nov 2009;93(2):168-173.
89. Shelley M, Wilt TJ, Coles B, et al. Cryotherapy for localised prostate cancer. *Cochrane Database Syst Rev*. 2007(3):CD005010.
90. Staffurth J. A review of the clinical evidence for intensity-modulated radiotherapy. *Clin Oncol (R Coll Radiol)*. Oct 2010;22(8):643-657.
91. van Tol-Geerdink JJ, Stalmeier PF, Pasker-de Jong PC, et al. Systematic review of the effect of radiation dose on tumor control and morbidity in the treatment of prostate cancer by 3D-CRT. *Int J Radiat Oncol Biol Phys*. Feb 1 2006;64(2):534-543.
92. Viani GA, da Silva LG, Stefano EJ. High-dose conformal radiotherapy reduces prostate cancer-specific mortality: results of a meta-analysis. *Int J Radiat Oncol Biol Phys*. Aug 1 2012;83(5):e619-625.
93. Viani GA, Stefano EJ, Afonso SL. Higher-than-conventional radiation doses in localized prostate cancer treatment: a meta-analysis of randomized, controlled trials. *Int J Radiat Oncol Biol Phys*. Aug 1 2009;74(5):1405-1418.
94. Wilt TJ, MacDonald R, Rutks I, et al. Systematic review: comparative effectiveness and harms of treatments for clinically localized prostate cancer. *Ann Intern Med*. Mar 18 2008;148(6):435-448.
95. Sajid S, Kotwal AA, Dale W. Interventions to improve decision making and reduce racial and ethnic disparities in the management of prostate cancer: a systematic review. *J Gen Intern Med*. Aug 2012;27(8):1068-1078.
96. Abdollah F, Schmitges J, Sun M, et al. Comparison of mortality outcomes after radical prostatectomy versus radiotherapy in patients with localized prostate cancer:

- 1  
2  
3 a population-based analysis. *Int J Urol*. Sep 2012;19(9):836-844; author reply 844-  
4 835.
- 5  
6 **97.** Boorjian SA, Karnes RJ, Viterbo R, et al. Long-term survival after radical  
7 prostatectomy versus external-beam radiotherapy for patients with high-risk prostate  
8 cancer. *Cancer*. Jul 1 2011;117(13):2883-2891.
- 9  
10 **98.** Cooperberg MR, Vickers AJ, Broering JM, et al. Comparative risk-adjusted mortality  
11 outcomes after primary surgery, radiotherapy, or androgen-deprivation therapy for  
12 localized prostate cancer. *Cancer*. Nov 15 2010;116(22):5226-5234.
- 13  
14 **99.** Zelefsky MJ, Eastham JA, Cronin AM, et al. Metastasis after radical prostatectomy or  
15 external beam radiotherapy for patients with clinically localized prostate cancer: a  
16 comparison of clinical cohorts adjusted for case mix. *J Clin Oncol*. Mar 20  
17 2010;28(9):1508-1513.
- 18  
19 **100.** Lu G, Ades AE. Assessing evidence inconsistency in mixed treatment comparisons.  
20 *Journal of the American Statistical Association*, 2006;101(474), 447-459.
- 21  
22 **101.** Lu G, Ades AE. Modeling between-trial variance structure in mixed treatment  
23 comparisons. *Biostatistics*, 2009;10(4), 792-805.
- 24  
25 **102.** Resnick MJ, Koyama T, Fan KH, et al. Long-term functional outcomes after treatment  
26 for localized prostate cancer. *N Engl J Med*, 2013;368(5):436-45.
- 27  
28 **103.** Sooriakumaran P1, Nyberg T, Akre O, et al. Comparative effectiveness of radical  
29 prostatectomy and radiotherapy in prostate cancer: observational study of mortality  
30 outcomes. *BMJ*. 2014 Feb 26;348:g1502. doi: 10.1136/bmj.g1502.
- 31  
32

### 33 **Figure Legends**

34  
35  
36 Figure 1. Flow chart of the inclusion process of the studies for network meta-analysis

37  
38 Figure 2. Risk of bias assessments for the included randomized trials

39  
40  
41 Figure 3. Network of comparisons of treatments for localized prostate cancer  
42 showing numbers of trials in which each pairwise comparison had been made  
43  
44  
45  
46  
47  
48  
49  
50  
51  
52  
53  
54  
55  
56  
57  
58  
59  
60



1  
2  
3 **COMPARATIVE EFFICACY AND SAFETY OF TREATMENTS FOR LOCALIZED PROSTATE**  
4 **CANCER: AN APPLICATION OF NETWORK META-ANALYSIS**  
5  
6  
7

8 **Tengbin Xiong, PhD**

9 *Research Associate, Department of Oncology, University of Cambridge, Box 279 (S4),*  
10 *Addenbrooke's Hospital, Hills Road, Cambridge, CB2 0QQ, UK*  
11

12  
13 **Rebecca M Turner, PhD**

14 *Statistician, MRC Biostatistics Unit, Institute of Public Health, Forvie Site, Robinson Way,*  
15 *Cambridge, CB2 0SR, UK*  
16

17  
18 **Yinghui Wei, PhD**

19 *Statistician, London Hub for Trials Methodology Research, MRC Clinical Trials Unit,*  
20 *Aviation House, 125 Kingsway, London WC2B 6NH, UK*  
21 *Lecturer in Statistics, School of Computing and Mathematics, Plymouth University,*  
22 *Plymouth, PL4 8AA, UK*  
23  
24

25 **David E Neal, MS, FMedSci, FSB, FRCS, FFPM**

26 *Professor of Surgical Oncology and Hon Consultant Urological Surgeon, Department of*  
27 *Oncology, University of Cambridge, Box 279 (S4), Addenbrooke's Hospital, Hills Road,*  
28 *Cambridge, CB2 0QQ, UK*  
29  
30

31 **Georgios Lyratzopoulos, MD**

32 *Clinical Senior Research Associate in Public Health / Epidemiology, Department of Public*  
33 *Health and Primary Care, Cambridge Centre for Health Services Research, University of*  
34 *Cambridge, Forvie Site, Robinson Way, Cambridge CB2 0SR, UK*  
35  
36

37 **Julian P T Higgins, PhD**

38 *Senior Statistician, MRC Biostatistics Unit, Institute of Public Health, Forvie Site,*  
39 *Robinson Way, Cambridge, CB2 0SR, UK*  
40 *Chair in Evidence Synthesis, Centre for Reviews and Dissemination, University of York,*  
41 *York YO10 5DD, UK*  
42  
43  
44  
45  
46

47 Word count: 2925  
48

49  
50 Key words: *Prostate cancer; Treatment; Randomised trials; Systematic review; Meta-*  
51 *analysis.*  
52  
53  
54

55 Corresponding author: *Tengbin Xiong, Department of Oncology, University of Cambridge,*  
56 *Box 279 (S4), Addenbrooke's Hospital, Hills Road, Cambridge, CB2 0QQ, UK*  
57  
58  
59  
60

**ABSTRACT**

**Context:** There is ongoing uncertainty about the optimal management of patients with localized prostate cancer.

**Objective:** To evaluate the comparative efficacy and safety of different treatments for patients with localized prostate cancer.

**Design:** Systematic review with Bayesian network meta-analysis to estimate comparative odds ratios, and a score (0-100%) that, for a given outcome, reflects average rank order of superiority of each treatment compared against all others, using the surface under the cumulative ranking curve (SUCRA) statistic.

**Data sources:** Electronic searches of Medline without language restriction.

**Study selection:** Randomized trials comparing the efficacy and safety of different primary treatments (48 papers from 21 randomized trials included 7,350 men).

**Data extraction:** Two reviewers independently extracted data and assessed risk of bias.

**Results:** Comparative efficacy and safety evidence was available for prostatectomy, external beam radiotherapy (different types and regimens), observational management and cryotherapy, but not high intensity focused ultrasound (HIFU).

There was no evidence of superiority for any of the compared treatments in respect of all-cause mortality after 5 years. Cryotherapy was associated with less gastrointestinal and genitourinary toxicity than radiotherapy (SUCRA: 99% and 77% for gastrointestinal and genitourinary toxicity, respectively).

**Conclusions:** The limited available evidence suggests that different treatments may be optimal for different efficacy and safety outcomes. These findings highlight the importance of informed patient choice and shared-decision making about treatment modality and acceptable trade-offs between different outcomes. More trial evidence is required to reduce uncertainty. Network meta-analysis may be useful to optimise the power of evidence synthesis studies once data from new randomised controlled studies in this field are published in the future.

## ARTICLE SUMMARY

### *Article focus*

- To evaluate the comparative efficacy and safety of different treatments for patients with localized prostate cancer.

### *Key messages*

- Comparative efficacy and safety evidence was available for prostatectomy, external beam radiotherapy (different types and regimens), observational management and cryotherapy, but not high intensity focused ultrasound (HIFU).
- There was no evidence of superiority for any of the compared treatments in respect of all-cause mortality. Different treatments may be optimal for different efficacy and safety outcomes.
- Network meta-analysis may be useful to optimise the power of evidence synthesis studies once data from new randomised controlled studies in this field are published in the future.

### *Strengths and limitations of this study*

- Network meta-analysis enabled us to integrate evidence from both direct comparisons (treatments compared head-to-head within a randomized trial) and indirect comparisons (treatments compared by combining the results of randomized trials with common comparators).
- This network meta-analysis only included randomised controlled trials and the risk of bias in each included study had been comprehensively assessed by using the Cochrane Collaboration's Risk of Bias tool, which strengthens the robustness of evidence synthesis.
- The number of available randomized controlled trials was small which could be a limitation of the study.



## BACKGROUND

Prostate cancer is a worldwide major public health issue.<sup>1</sup> Nearly 75% of diagnosed cases, however, occur in developed countries,<sup>2</sup> where it is typically the most common cancer in men.<sup>3-4</sup> In the UK, about 40,000 men are diagnosed with prostate cancer and 10,000 men die from it every year.<sup>3</sup> In the US, there are 240,000 new diagnoses of prostate cancer, with 34,000 associated deaths every year.<sup>5</sup> Most patients with prostate cancers are diagnosed at an early stage,<sup>6-7</sup> and many diagnoses are made in asymptomatic men.<sup>8-10</sup>

The main treatment options for localized prostate cancer include radical prostatectomy, external beam radiotherapy and observational management (that is, regular testing of clinical, biochemical or radiological markers or as prompted by occurrence of symptoms).<sup>8</sup> Because some of these treatments are associated with substantial risk of side effects, it is important to try to resolve the current uncertainty about the optimal treatment options.

Some randomized trials have compared the efficacy and safety of two or three treatments. For example, the SPCG-4 trial in Europe and the PIVOT study in the US compared radical prostatectomy with observational management.<sup>11-12</sup> The UK Prostate Testing for Cancer and Treatment ( ProtecT) trial is evaluating treatment effectiveness of active monitoring, radical prostatectomy and external beam radiotherapy for clinically localized prostate cancer in men aged 50-69 years identified through population-based PSA testing.<sup>13</sup> The recruitment phase for the ProtecT trial, which began in 1999, has been completed, but outcomes will not be available until a minimum follow-up period has been accrued.

1  
2  
3 It is unlikely that any single trial will compare all available treatment options. We  
4 therefore performed a network meta-analysis based on a systematic review of  
5 completed randomized trials comparing different interventions for patients with  
6 localized prostate cancer. The network meta-analysis allowed us to integrate  
7 evidence from both direct comparisons (treatments compared head-to-head within a  
8 randomized trial) and indirect comparisons (treatments compared by combining the  
9 results of randomized trials with common comparators).<sup>14-16</sup> Our objective was to  
10 apply the established methodology used in network meta-analysis to an area of  
11 clinical practice where no such previous studies existed. In doing so, our aims were  
12 to summarise existing evidence; 'map out' current gaps in comparative evidence to  
13 help motivate the design and conduct of future comparative studies; and develop an  
14 approach 'primed' for subsequent updating and incorporation of future trial evidence.  
15  
16  
17  
18  
19  
20  
21  
22  
23  
24  
25  
26  
27  
28  
29  
30  
31  
32  
33  
34  
35  
36  
37  
38  
39  
40  
41  
42  
43  
44  
45  
46  
47  
48  
49  
50  
51  
52  
53  
54  
55  
56  
57  
58  
59  
60

## METHODS

### Eligibility criteria

We sought completed randomized trials in men with localized prostate cancer that had compared two or more of the following interventions (as primary treatment, with or without the same adjuvant therapy in all arms): prostatectomy; radiotherapy including brachytherapy; cryotherapy; high-intensity focused ultrasound (HIFU) and observational management. Observational management is characterized by testing of clinical, biochemical or radiological markers of disease progression at regular intervals (typically every 6 months) or as prompted by the occurrence of new symptoms, possibly leading to either radical or palliative treatment. We opted to use the term 'observational management' in preference to active surveillance or active monitoring because the latter terms typically aim to keep men in a window of curability so that only those who require it undergo radical treatment.

Eligible trials had to have reported any of the following efficacy and safety outcomes: all-cause mortality, prostate cancer mortality and gastrointestinal or genitourinary toxicity. Studies comparing treatment combinations or sequences (e.g. per protocol management by surgery with subsequent radiotherapy) were excluded.

### Identification of studies

We adopted the search strategy of a systematic review that supported the development of clinical guidelines on the diagnosis and treatment of prostate cancer by the UK's National Institute for Health and Clinical Excellence (NICE) in 2008.<sup>8</sup>

Studies had been identified by searching Medline (in 2006) and scanning reference list of papers. We retrieved all relevant randomized trials identified in the NICE guideline and implemented the same search strategies to update the collection of trials. We restricted the search to the period from January 2005 to September 2012.

1  
2  
3 No language limits were placed on the searches (see Appendix 1 for full search  
4 strategies).  
5  
6  
7

### 8 9 **Data extraction**

10  
11 Two reviewers (TX and RT) independently screened all the titles and abstracts of the  
12 studies retrieved by the searches for potentially eligible trials, and then independently  
13 assessed the full articles of these trials to confirm whether they met the eligibility  
14 criteria. The results were checked and discussed by TX and RT to agree upon a final  
15 list of included studies. Using a structured and piloted data collection form, all  
16 relevant data in each included paper were extracted by two reviewers independently  
17 (TX and RT/YW). The data extracted were cross-checked and unresolved  
18 discrepancies were referred to a third reviewer; where necessary, problems were  
19 discussed in a panel meeting (TX, RT, YW, JH and GL) whilst DN acted as a clinical  
20 expert advisor.  
21  
22  
23  
24  
25  
26  
27  
28  
29  
30  
31

32  
33 For each included study, we extracted characteristics of participants and  
34 interventions, outcomes reported and collected, sample size (randomized and  
35 analysed) in each arm, numerical results, losses to follow-up and details of patients  
36 excluded from the analyses.<sup>17</sup> To inform the appropriateness of including studies in  
37 the meta-analysis and facilitate assessment of the strength of the evidence we  
38 assessed the risk of bias in each included study using The Cochrane Collaboration's  
39 Risk of Bias tool.<sup>18</sup> Two reviewers (TX and either RT or YW) completed this  
40 independently and agreed on final assessments. The tool assesses risk of bias  
41 arising from inadequacies in processes of generation of the random allocation  
42 sequence, concealment of the allocation sequence and blinding, and from incomplete  
43 outcome data and selective outcome reporting.  
44  
45  
46  
47  
48  
49  
50  
51  
52  
53  
54  
55  
56  
57  
58  
59  
60

## Outcomes

We analysed all-cause mortality and cancer-related mortality at 5 years, late gastrointestinal and late genitourinary toxicity at 3 years. The choice of these follow-up times was pragmatic, as they were the ones most frequently reported in the included trials. Once these time points had been chosen, we extracted the outcome data from the time nearest to these targeted measurement times. Late gastrointestinal and late genitourinary toxicity were defined as scores  $\geq 2$  measured by the Radiation Therapy Oncology Group (RTOG) questionnaire scale by 3 years follow-up.<sup>19</sup> We have not encompassed biochemical or clinical failure as operational definitions of either of those outcomes tend to be specific to different radical treatment modalities.<sup>20</sup>

## Statistical analyses

Initially, we compared each pair of treatments using direct evidence alone, for each outcome. Separate meta-analyses were performed for each pair-wise comparison of interventions: a random-effects model was fitted within each comparison,<sup>21</sup> with a common between-study heterogeneity variance assumed across comparisons to allow for heterogeneity even when only a single study was available. Results are reported as odds ratios with 95% confidence intervals, for every comparison evaluated directly in one or more studies.

Next, we fitted a network meta-analysis model for each outcome separately,<sup>22</sup> combining direct evidence for each comparison (e.g. from studies comparing interventions A with B) with indirect evidence (e.g. from studies comparing A with C and studies comparing B with C), for all pair-wise comparisons simultaneously. The model accounts explicitly for the binary nature of each outcome using a binomial likelihood function; allows for heterogeneity of treatment effects between trials of the

1  
2  
3 same comparison (assuming the same amount of heterogeneity for each comparison,  
4  
5 irrespective of how many trials address it); and enforces an underlying relationship  
6  
7 between direct and indirect evidence for a particular comparison, assuming these are  
8  
9 consistent between the two sources. For each 'loop' of treatment comparisons from  
10  
11 three or more independent sources and for each outcome, we computed the  
12  
13 difference between estimates from direct and indirect evidence [on the log odds ratio](#)  
14  
15 [scale](#).<sup>100</sup> This provides a measure of inconsistency between the different sources. We  
16  
17 did not implement more sophisticated methods for testing or adjusting for  
18  
19 inconsistency, due to the small number of loops in the network.  
20

21  
22  
23 Results are reported as odds ratios with 95% credible intervals, for all pair-wise  
24  
25 comparisons of interventions. All analyses were performed within a Bayesian  
26  
27 framework, using Markov chain Monte Carlo methods in WinBUGS (MRC  
28  
29 Biostatistics Unit, Cambridge, UK).<sup>23</sup> Informative prior distributions were used for the  
30  
31 heterogeneity variance, from a published set of distributions for heterogeneity  
32  
33 expected in meta-analyses examining particular intervention and outcome types,<sup>24</sup>  
34  
35 since heterogeneity is imprecisely estimated when the number of studies is small.  
36  
37 For all-cause mortality, a log-normal  $(-3.93, 1.51^2)$  distribution was used. For  
38  
39 gastrointestinal and genitourinary toxicity, a log-normal  $(-2.01, 1.64^2)$  distribution was  
40  
41 used. For cancer-related mortality, a log-normal  $(-2.89, 1.91^2)$  distribution was used.  
42  
43 Vague  $N(0, 10^4)$  priors were used for all other model parameters. Results were  
44  
45 based on 100,000 iterations, following a burn-in of 20,000 iterations.  
46  
47  
48

49  
50 For each outcome, we estimated the probability that each intervention is superior to  
51  
52 all others, the second best, the third best and so on, from the rank orderings of the  
53  
54 treatments at each iteration of the Markov chain. These ranking probabilities were  
55  
56 used to calculate a summary numerical value: the SUCRA (surface under the  
57  
58 cumulative ranking curve).<sup>25</sup> SUCRA values are expressed as percentages; if an  
59  
60

1  
2  
3 intervention is certainly the best, its SUCRA value would be 100%, and if an  
4  
5 intervention is certainly the worst, its SUCRA value would be 0%. If all interventions  
6  
7 are equivalent, we would expect all SUCRA values to be near 50%. We also report  
8  
9 the median ranks and 95% credible intervals for each intervention.  
10  
11  
12  
13  
14  
15  
16  
17  
18  
19  
20  
21  
22  
23  
24  
25  
26  
27  
28  
29  
30  
31  
32  
33  
34  
35  
36  
37  
38  
39  
40  
41  
42  
43  
44  
45  
46  
47  
48  
49  
50  
51  
52  
53  
54  
55  
56  
57  
58  
59  
60

For peer review only

## RESULTS

### Included studies and interventions

The NICE systematic review<sup>8</sup> had identified 20 reports relating to 14 randomized trials.<sup>26-45</sup> Our updated searches retrieved 1,740 studies and identified 39 reports of relevant randomized trials, of which 30 had not been included in the NICE review (Figure 1).<sup>46-75</sup> One of these reports was the sole report of a trial providing data only on acute toxicity,<sup>40</sup> one paper reported only clinical failure,<sup>38</sup> and one paper reported biochemical failure, biochemical disease-free survival and quality of life;<sup>56</sup> these 3 studies were then excluded since they did not report the outcomes of interest to us.

In addition to the remaining 47 full papers from peer-reviewed journals, we identified and included in the analysis data from a conference abstract, describing a randomized trial comparing external beam radiotherapy versus watchful waiting,<sup>76</sup> and reporting data on long term mortality not previously reported in full-text related publications.<sup>77-78</sup>

Our searches also identified 16 relevant systematic reviews.<sup>79-94</sup> We scrutinized the reference lists of all these as well as any further systematic reviews identified by the NICE review, and found no further relevant randomized trials.

The 48 identified reports described 21 randomized trials comparing the effectiveness of different treatments for localized prostate cancer.<sup>26-37, 39, 41-55, 57-76</sup> Seventeen trials reported all-cause mortality, 16 trials reported cancer-related mortality, 16 trials reported gastrointestinal (GI) toxicity, 15 trials reported genitourinary (GU) toxicity.

The characteristics of included studies are summarized in Appendix 2.

The risk of bias assessments for the included trials are illustrated in Figure 2. Most of the evidence was of moderate to good quality. About half of the studies did not report



1  
2  
3 adequate information about allocation sequence generation and allocation sequence  
4 concealment. Unblinded designs were used in all trials included; we judged this  
5 unlikely to cause bias for objectively-measured outcomes such as mortality, but  
6 generate bias in the reporting and assessment of patient-reported toxicity outcomes.  
7  
8 The small number of studies precluded the investigation of potential reporting biases  
9 across studies (for example using funnel plots). Our searches were appropriate, but  
10 the possibility of publication bias cannot be excluded. It is unclear, however, whether  
11 reporting biases would tend to favour any particular treatment (see Appendix 3 for  
12 details of bias assessments for included trials).  
13  
14  
15  
16  
17  
18  
19  
20  
21  
22

23 We categorized the interventions into the following eight categories: observational  
24 management; prostatectomy; conventional radiotherapy ([refers to two dimensional](#)  
25 [external beam radiation therapy](#)); conventional radiotherapy- hypofractionated ([refers](#)  
26 [to less than 20 fractions](#)); conformal low dose (LD) radiotherapy ([refers to less than](#)  
27 [68 Gy](#)); conformal high dose (HD) radiotherapy ([refers to more than 74 Gy](#));  
28 conformal LD radiotherapy-hypofractionated; and cryotherapy. Twenty trials had two  
29 intervention arms. One trial compared three interventions,<sup>54</sup> since two of the three  
30 interventions were very similar and both met our definition of conformal LD  
31 radiotherapy-hypofractionated, we combined the data from these two arms and  
32 regarded the trial as a two-treatment comparison (conformal LD radiotherapy-  
33 hypofractionated versus conformal HD radiotherapy). None of the reviewed studied  
34 assessed brachytherapy and HIFU. Figure 3 illustrates the full network of  
35 comparisons. There were two closed loops of comparisons, one connecting  
36 prostatectomy, observational management and radiotherapy modalities; and the  
37 other connecting different radiotherapy modalities.<sup>100</sup> No inconsistency was detected  
38 in our estimates of the difference between direct and indirect evidence; however,  
39 precision was very low. Cryotherapy only had a single link to the network.  
40  
41  
42  
43  
44  
45  
46  
47  
48  
49  
50  
51  
52  
53  
54  
55  
56  
57  
58  
59  
60

### All-cause mortality

All-cause mortality was reported in 17 trials, covering all the eight interventions of interest. There is no evidence of superiority of any treatment for all-cause mortality. For each pairwise comparison of interventions, the 95% intervals for odds ratios were wide and included 1. The lower-left triangle of results in Table 1 presents odds ratios estimated from direct evidence alone, while the upper-right triangle of results presents odds ratios estimated from the network meta-analysis. The intervals are slightly narrower when based on indirect as well as direct evidence rather than direct evidence alone. The SUCRA values presented in Table 2 summarize the ranking information for all interventions. With respect to all-cause mortality, the highest SUCRA values are 69% for conformal LD radiotehrapy-hypofractionated and 63% for conformal HD radiotherapy, indicating that these are most likely to be among the best treatments for this outcome. However, there is very high uncertainty in the rankings of the interventions, as indicated by wide 95% credible intervals.

### Cancer-related mortality

Cancer-related mortality was reported in 16 trials, covering eight of the interventions. This was a rare outcome in most treatment groups, as expected for patients with localized prostate cancer with a 5 year end point. Odds ratio estimates had wide 95% credible intervals, particularly in comparisons for which only indirect evidence was available, and there was no evidence of superiority for any of the comparator treatments (Table 3). Based on direct comparisons alone, conformal HD radiotherapy was superior to conventional radiotherapy [odds ratio 0.21 (95% interval 0.03, 0.97)] and prostatectomy was superior to observational management [odds ratio 0.60 (95% interval 0.37, 0.98)].

### Gastrointestinal and genitourinary toxicity

Late gastrointestinal toxicity was reported in 16 trials and late genitourinary toxicity was reported in 15 trials. There was evidence that cryotherapy resulted in fewer adverse gastrointestinal events than radiotherapy treatments (estimated odds ratios comparing cryotherapy against the five radiotherapy options ranged from 0.12 to 0.24, whilst all but one of the respective 95% credible intervals excluded 1). The SUCRA value of 99% for cryotherapy and the median rank of 1 (95% interval 1, 2) suggest that cryotherapy is almost certainly superior among the six treatments included in the network meta-analysis in relation to adverse gastrointestinal events (Table 2 and 4). There was also evidence that gastrointestinal toxicity was more likely with conformal HD radiotherapy than with conformal LD radiotherapy. Interpretation of such findings for toxicity should be more cautious than for the other outcomes, due to a concern that lack of blinding could have led to a risk of detection bias. For genitourinary toxicity, there was no evidence favouring one intervention over another (Table 5), although cryotherapy tended to receive better rankings than the five radiotherapy treatments (Table 2), and the odds ratio estimates favour cryotherapy, but the 95% intervals all included 1.

Figure 1. Flow chart of the inclusion process of the studies for network meta-analysis

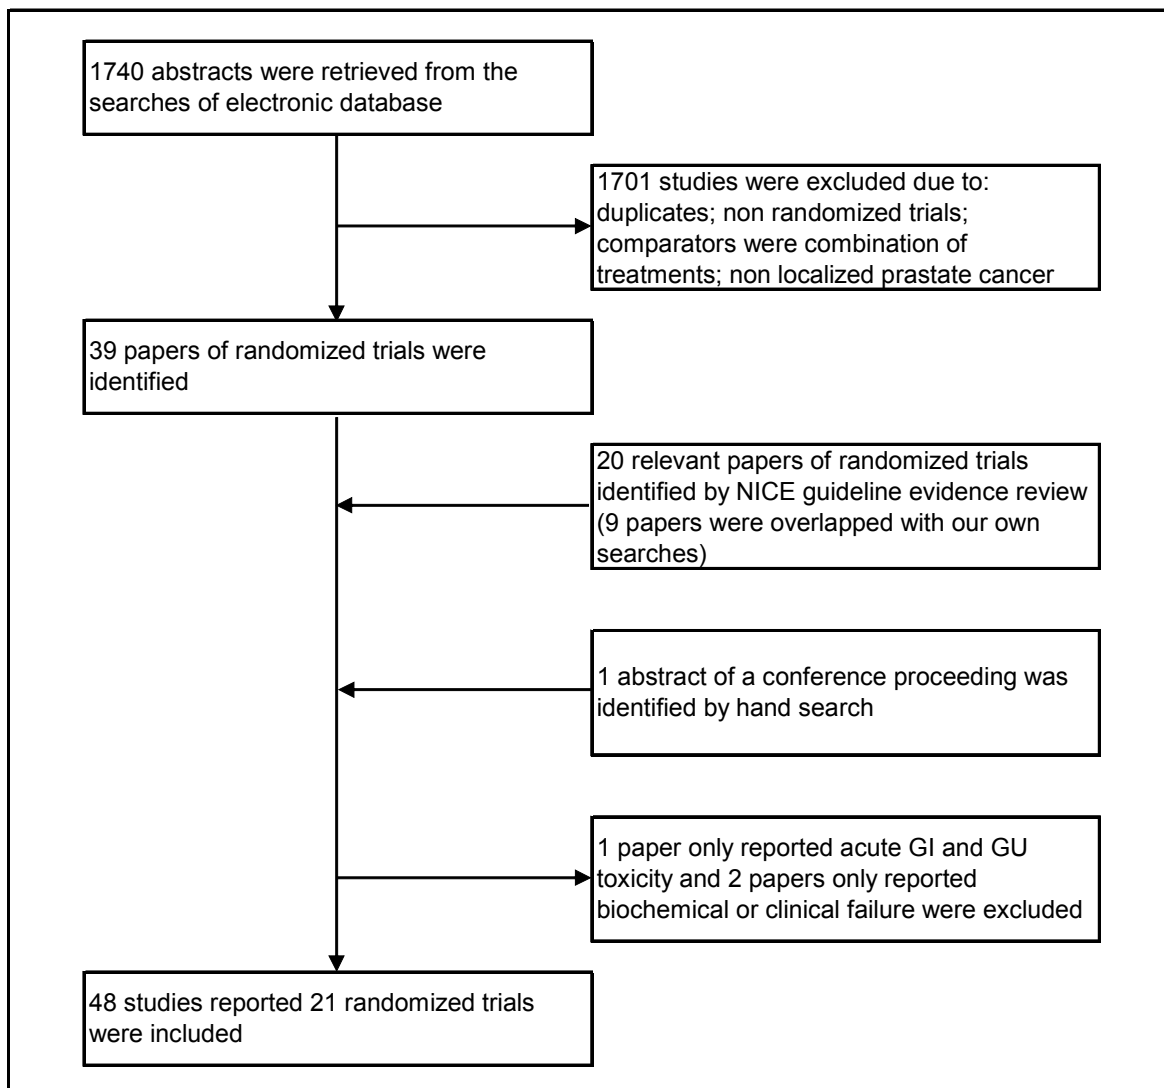

Only

Figure 2. Risk of bias assessments for the included randomized trials

|                          | Random sequence generation | Allocation concealment | Blinding of participants and personnel | Blinding of outcome assessment | Incomplete outcome data | Selective reporting | Other bias |
|--------------------------|----------------------------|------------------------|----------------------------------------|--------------------------------|-------------------------|---------------------|------------|
| Akakura 2006 (a,b)       | ?                          | ?                      | +                                      | +                              | ?                       | ?                   | +          |
| Arcangeli 2010 (a,b)     | ?                          | ?                      | +                                      | +                              | +                       | +                   | ?          |
| (c)                      | ?                          | ?                      | -                                      | -                              | +                       | ?                   | +          |
| Chin 2008 (a,b)          | ?                          | ?                      | +                                      | +                              | ?                       | ?                   | +          |
| (c)                      | ?                          | ?                      | -                                      | -                              | ?                       | ?                   | +          |
| MRC RT01 (a,b)           | +                          | +                      | +                                      | +                              | ?                       | +                   | +          |
| (c)                      | +                          | +                      | -                                      | -                              | +                       | +                   | +          |
| Royal Marsden (a)        | +                          | +                      | +                                      | +                              | +                       | ?                   | +          |
| (c)                      | +                          | +                      | -                                      | -                              | +                       | -                   | +          |
| Canada trial (a,b)       | ?                          | ?                      | +                                      | +                              | +                       | ?                   | +          |
| (c)                      | ?                          | ?                      | -                                      | -                              | +                       | ?                   | +          |
| Graversen 1990 (a)       | ?                          | ?                      | +                                      | +                              | -                       | +                   | -          |
| Koper trial (c)          | ?                          | ?                      | -                                      | -                              | +                       | ?                   | +          |
| Lukka 2005 (a,b)         | +                          | +                      | +                                      | +                              | +                       | +                   | +          |
| (c)                      | +                          | +                      | -                                      | -                              | +                       | +                   | +          |
| Marzi 2009 (c)           | ?                          | ?                      | -                                      | -                              | -                       | ?                   | +          |
| Norkus 2009 (a,b)        | ?                          | ?                      | +                                      | +                              | +                       | +                   | +          |
| Dutch trial (a,b)        | -                          | -                      | +                                      | +                              | -                       | ?                   | +          |
| (c)                      | +                          | +                      | -                                      | -                              | +                       | ?                   | +          |
| M.D.Anderson (a,b)       | ?                          | ?                      | +                                      | +                              | ?                       | ?                   | +          |
| (c)                      | ?                          | ?                      | -                                      | -                              | ?                       | ?                   | +          |
| SPCG-4 (a,b)             | +                          | ?                      | +                                      | +                              | +                       | +                   | +          |
| (c)                      | +                          | ?                      | -                                      | -                              | +                       | ?                   | +          |
| Yeoh trial (a,b)         | +                          | ?                      | +                                      | +                              | +                       | +                   | +          |
| Zietman trial (a,b)      | +                          | +                      | +                                      | +                              | +                       | ?                   | +          |
| (c)                      | +                          | +                      | -                                      | -                              | +                       | ?                   | +          |
| PIVOT trial (a,b)        | +                          | +                      | +                                      | +                              | +                       | +                   | +          |
| (c)                      | +                          | +                      | -                                      | -                              | +                       | +                   | +          |
| Widmark 2011 (a,b)       | ?                          | ?                      | +                                      | +                              | ?                       | ?                   | ?          |
| CHHiP trial (c)          | +                          | +                      | -                                      | -                              | +                       | +                   | +          |
| GETUG 06 trial (a,b)     | ?                          | ?                      | +                                      | +                              | +                       | ?                   | +          |
| (c)                      | ?                          | ?                      | -                                      | -                              | +                       | ?                   | +          |
| MRC RT01 pilot trial (b) | +                          | +                      | +                                      | +                              | +                       | ?                   | +          |
| (c)                      | +                          | +                      | -                                      | -                              | +                       | ?                   | +          |

**Outcomes measured:**  
a - all cause mortality.  
b - cancer related mortality.  
c - gastrointestinal and genitourinary toxicity.

**Key:**  
 Low risk of bias  
 High risk of bias  
 Unclear risk of bias

1  
2  
3  
4  
5  
6  
7  
8  
9  
10  
11  
12  
13  
14  
15  
16  
17  
18  
19  
20  
21  
22  
23  
24  
25  
26  
27  
28  
29  
30  
31  
32  
33  
34  
35  
36  
37  
38  
39  
40  
41  
42  
43  
44  
45  
46  
47  
48  
49  
50  
51  
52  
53  
54  
55  
56  
57  
58  
59  
60

**Figure 3.** Network of comparisons of treatments for localized prostate cancer showing numbers of trials in which each pairwise comparison had been made

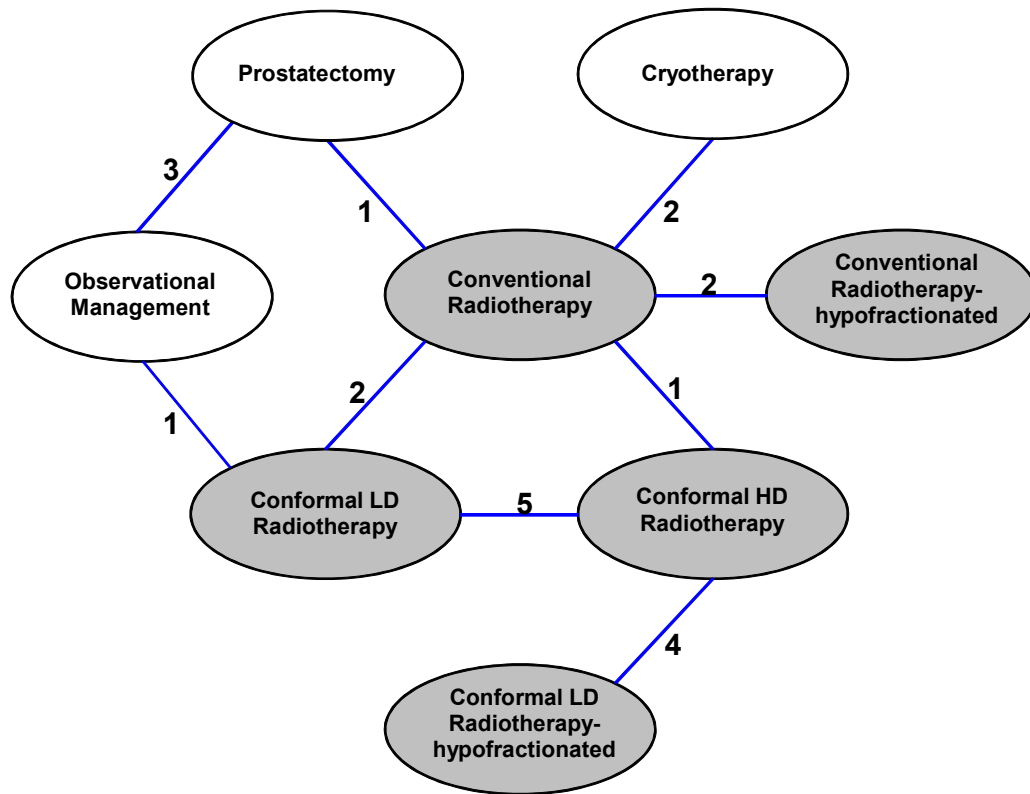

**Abbreviations:** LD: low dose; HD: high dose.  
 Grey-shaded ovals indicate external radiotherapy modalities.

1  
2  
3  
4  
5  
6  
7  
8  
9  
10  
11  
12  
13  
14  
15  
16  
17  
18  
19  
20  
21  
22  
23  
24  
25  
26  
27  
28  
29  
30  
31  
32  
33  
34  
35  
36  
37  
38  
39  
40  
41  
42  
43  
44  
45  
46  
47  
48  
49

**Table 1.** All-cause mortality: odds ratios (posterior mean with 95% intervals) for each pair-wise comparison of interventions, based on direct evidence alone (lower-left triangle) or direct and indirect evidence (upper-right triangle).

| Intervention                               | Observational management      | Prostatectomy                 | Conventional radiotherapy     | Conventional radiotherapy-hypofractionated | Conformal LD radiotherapy     | Conformal HD radiotherapy     | Conformal LD radiotherapy-hypofractionated | Cryotherapy      |
|--------------------------------------------|-------------------------------|-------------------------------|-------------------------------|--------------------------------------------|-------------------------------|-------------------------------|--------------------------------------------|------------------|
| Observational management                   |                               | 0.79 (0.61,1.02)              | 0.84 (0.48,1.57)              | 0.72 (0.37,1.49)                           | 0.73 (0.44,1.26)              | 0.70 (0.40,1.28)              | 0.53 (0.10,2.88)                           | 0.76 (0.28,1.98) |
| Prostatectomy                              | <sup>3</sup> 0.80 (0.61,1.06) |                               | 1.06 (0.60,2.02)              | 0.91 (0.46,1.90)                           | 0.92 (0.54,1.64)              | 0.88 (0.49,1.66)              | 0.67 (0.12,3.65)                           | 0.96 (0.36,2.56) |
| Conventional radiotherapy                  | -                             | <sup>1</sup> 1.34 (0.55,3.24) |                               | 0.85 (0.59,1.24)                           | 0.86 (0.55,1.35)              | 0.82 (0.51,1.35)              | 0.62 (0.11,3.21)                           | 0.90 (0.41,1.89) |
| Conventional radiotherapy-hypofractionated | -                             | -                             | <sup>2</sup> 0.85 (0.59,1.24) |                                            | 1.01 (0.56,1.80)              | 0.97 (0.53,1.78)              | 0.73 (0.13,3.86)                           | 1.05 (0.44,2.42) |
| Conformal LD radiotherapy                  | <sup>1</sup> 0.66 (0.35,1.21) | -                             | <sup>1</sup> 0.92 (0.50,1.72) | -                                          |                               | 0.96 (0.72,1.29)              | 0.72 (0.14,3.51)                           | 1.04 (0.42,2.49) |
| Conformal HD radiotherapy                  | -                             | -                             | <sup>1</sup> 0.87 (0.39,1.92) | -                                          | <sup>4</sup> 0.95 (0.70,1.31) |                               | 0.74 (0.14,3.61)                           | 1.09 (0.43,2.64) |
| Conformal LD radiotherapy-hypofractionated | -                             | -                             | -                             | -                                          | -                             | <sup>2</sup> 0.78 (0.13,4.25) |                                            | 1.47 (0.22,9.40) |
| Cryotherapy                                | -                             | -                             | <sup>2</sup> 0.90 (0.41,2.02) | -                                          | -                             | -                             | -                                          |                  |

LD: low dose; HD: high dose.

Lower-left results compare row-defining interventions against column-defining interventions. Upper-right results compare column-defining interventions against row-defining interventions.

In the meta-analysis of direct comparisons (reported in lower-left triangle), between-trial heterogeneity  $\tau^2$  was estimated as 0.009 (95% interval 0.001 to 0.08). In the network meta-analysis (reported in upper-right triangle), between-trial heterogeneity  $\tau^2$  was estimated as 0.009 (95% interval 0.001 to 0.07).

The small superscript numbers in the cells of lower-left triangle indicate the numbers of randomized trials which compared the two interventions directly.

**Table 2.** Ranking of interventions with respect to all-cause and cancer-related mortality, adverse gastrointestinal and genitourinary events: SUCRA (Surface Under the Cumulative RAnking curve) values and median ranks (with 95% intervals).†

| Intervention                               | All-cause mortality |                            | Cancer-related mortality |                            | Adverse gastrointestinal events |                            | Adverse genitourinary events |                            |
|--------------------------------------------|---------------------|----------------------------|--------------------------|----------------------------|---------------------------------|----------------------------|------------------------------|----------------------------|
|                                            | SUCRA value         | Median rank (95% interval) | SUCRA value              | Median rank (95% interval) | SUCRA value                     | Median rank (95% interval) | SUCRA value                  | Median rank (95% interval) |
| Observational management                   | 18%                 | 7 (2, 8)                   | 30%                      | 6 (3, 8)                   | -                               | -                          | -                            | -                          |
| Prostatectomy                              | 49%                 | 5 (1, 7)                   | 64%                      | 4 (1, 7)                   | -                               | -                          | -                            | -                          |
| Conventional radiotherapy                  | 35%                 | 6 (2, 8)                   | 16%                      | 7 (4, 8)                   | 43%                             | 4 (2, 6)                   | 51%                          | 3 (1, 6)                   |
| Conventional radiotherapy-hypofractionated | 58%                 | 4 (1, 8)                   | 44%                      | 5 (1, 8)                   | 42%                             | 4 (1, 6)                   | 50%                          | 3 (1, 6)                   |
| Conformal LD radiotherapy                  | 57%                 | 4 (1, 7)                   | 61%                      | 4 (2, 7)                   | 67%                             | 2 (2, 4)                   | 66%                          | 3 (1, 5)                   |
| Conformal HD radiotherapy                  | 63%                 | 3 (1, 7)                   | 75%                      | 2 (1, 6)                   | 19%                             | 5 (3, 6)                   | 30%                          | 5 (2, 6)                   |
| Conformal LD radiotherapy-hypofractionated | 69%                 | 1 (1, 8)                   | 85%                      | 1 (1, 8)                   | 30%                             | 5 (2, 6)                   | 26%                          | 5 (1, 6)                   |
| Cryotherapy                                | 50%                 | 4 (1, 8)                   | 24%                      | 7 (2, 8)                   | 99%                             | 1 (1, 2)                   | 77%                          | 1 (1, 6)                   |

† The surface under the cumulative ranking curve (SUCRA) value is a numerical summary of the estimated probabilities that each treatment is the best, second best, third best (and so on) for that particular outcome. Higher values indicate higher rankings compared with other treatments. For example, for cryotherapy, the high SUCRA value of 99% and median rank of 1 for adverse gastrointestinal events shows that cryotherapy is expected to be superior with respect to this outcome.

LD: low dose; HD: high dose.



**Table 3.** Prostate cancer-caused mortality: odds ratios (posterior mean with 95% intervals) for each pair-wise comparison of interventions, based on direct evidence alone (lower-left triangle) or direct and indirect evidence (upper-right triangle).

| Intervention                               | Observational management      | Prostatectomy                 | Conventional radiotherapy     | Conventional radiotherapy-hypofractionated | Conformal LD radiotherapy     | Conformal HD radiotherapy      | Conformal LD radiotherapy-hypofractionated | Cryotherapy      |
|--------------------------------------------|-------------------------------|-------------------------------|-------------------------------|--------------------------------------------|-------------------------------|--------------------------------|--------------------------------------------|------------------|
| Observational management                   |                               | 0.63 (0.40,1.02)              | 1.39 (0.49,4.16)              | 0.90 (0.24,3.42)                           | 0.63 (0.29,1.31)              | 0.52 (0.22,1.19)               | 0.13 (0.00*,3.59)                          | 1.37 (0.28,6.89) |
| Prostatectomy                              | <sup>2</sup> 0.60 (0.37,0.98) |                               | 2.20 (0.82,6.37)              | 1.42 (0.39,5.19)                           | 0.99 (0.42,2.26)              | 0.83 (0.32,2.00)               | 0.20 (0.00*,6.07)                          | 2.16 (0.46,10.9) |
| Conventional radiotherapy                  | -                             | <sup>1</sup> 1.65 (0.53,5.44) |                               | 0.64 (0.29,1.41)                           | 0.45 (0.14,1.30)              | 0.38 (0.12,1.06)               | 0.09 (0.00*,3.08)                          | 0.98 (0.28,3.35) |
| Conventional radiotherapy-hypofractionated | -                             | -                             | <sup>2</sup> 0.65 (0.28,1.43) |                                            | 0.70 (0.18,2.65)              | 0.59 (0.15,2.16)               | 0.14 (0.00*,5.08)                          | 1.51 (0.36,6.54) |
| Conformal LD radiotherapy                  | <sup>1</sup> 0.70 (0.31,1.57) | -                             | -                             | -                                          |                               | 0.84 (0.52,1.30)               | 0.20 (0.00*,5.73)                          | 2.20 (0.44,11.4) |
| Conformal HD radiotherapy                  | -                             | -                             | <sup>1</sup> 0.21 (0.03,0.97) | -                                          | <sup>5</sup> 0.86 (0.53,1.37) |                                | 0.25 (0.00*,6.79)                          | 2.61 (0.53,14.1) |
| Conformal LD radiotherapy-hypofractionated | -                             | -                             | -                             | -                                          | -                             | <sup>2</sup> 0.22 (0.00*,6.85) |                                            | 11.2 (0.24,5542) |
| Cryotherapy                                | -                             | -                             | <sup>2</sup> 0.96 (0.27,3.46) | -                                          | -                             | -                              | -                                          |                  |

LD: low dose; HD: high dose.

\* Odds ratio was less than 0.005.

Lower-left results compare row-defining interventions against column-defining interventions. Upper-right results compare column-defining interventions against row-defining interventions.

In the meta-analysis of direct comparisons (reported in lower-left triangle), between-trial heterogeneity  $\tau^2$  was estimated as 0.02 (95% interval 0.001 to 0.31).

In the network meta-analysis (reported in upper-right triangle), between-trial heterogeneity  $\tau^2$  was estimated as 0.02 (95% interval 0.001 to 0.29).

The small superscript numbers in the cells of lower-left triangle indicate the numbers of randomized trials which compared the two interventions directly.

**Table 4.** Adverse gastrointestinal events: odds ratios ([posterior mean](#) with 95% intervals) for each pair-wise comparison of interventions, based on direct evidence alone (lower-left triangle) or direct and indirect evidence (upper-right triangle).

| Intervention                               | Observational management         | Prostatectomy | Conventional radiotherapy        | Conventional radiotherapy-hypofractionated | Conformal LD radiotherapy        | Conformal HD radiotherapy        | Conformal LD radiotherapy-hypofractionated | Cryotherapy      |
|--------------------------------------------|----------------------------------|---------------|----------------------------------|--------------------------------------------|----------------------------------|----------------------------------|--------------------------------------------|------------------|
| Observational management                   |                                  | -             | -                                | -                                          | -                                | -                                | -                                          | -                |
| Prostatectomy                              | <sup>2</sup> 0.84<br>(0.33,1.88) |               | -                                | -                                          | -                                | -                                | -                                          | -                |
| Conventional radiotherapy                  | -                                | -             |                                  | 1.01 (0.19,5.29)                           | 0.72 (0.29,1.59)                 | 1.42 (0.57,3.39)                 | 1.26 (0.35,4.30)                           | 0.17 (0.04,0.51) |
| Conventional radiotherapy-hypofractionated | -                                | -             | <sup>1</sup> 1.00<br>(0.22,4.56) |                                            | 0.70 (0.11,4.37)                 | 1.40 (0.21,9.02)                 | 1.24 (0.15,9.76)                           | 0.17 (0.02,1.19) |
| Conformal LD radiotherapy                  | -                                | -             | <sup>2</sup> 0.46<br>(0.17,1.16) | -                                          |                                  | 1.98 (1.18,3.59)                 | 1.77 (0.63,5.11)                           | 0.24 (0.05,0.96) |
| Conformal HD radiotherapy                  | -                                | -             | <sup>1</sup> 2.66<br>(0.85,8.62) | -                                          | <sup>5</sup> 1.73<br>(1.07,2.97) |                                  | 0.89 (0.36,2.15)                           | 0.12 (0.02,0.48) |
| Conformal LD radiotherapy-hypofractionated | -                                | -             | -                                | -                                          | -                                | <sup>3</sup> 0.89<br>(0.39,1.96) |                                            | 0.14 (0.02,0.70) |
| Cryotherapy                                | -                                | -             | <sup>2</sup> 0.18<br>(0.05,0.50) | -                                          | -                                | -                                | -                                          |                  |

LD: low dose; HD: high dose.

Lower-left results compare row-defining interventions against column-defining interventions. Upper-right results compare column-defining interventions against row-defining interventions.

The comparison of prostatectomy with observational management was not linked to the rest of the network, so this evidence was included in the meta-analysis of direct comparisons only.

In the meta-analysis of direct comparisons (reported in lower-left triangle), between-trial heterogeneity  $\tau^2$  was estimated as 0.14 (95% interval 0.01 to 0.97). In the network meta-analysis (reported in upper-right triangle), between-trial heterogeneity  $\tau^2$  was estimated as 0.24 (95% interval 0.02 to 1.23).

The small superscript numbers in the cells of lower-left triangle indicate the numbers of randomized trials which compared the two interventions directly.

1  
2  
3  
4  
5  
6  
7  
8  
9  
10  
11  
12  
13  
14  
15  
16  
17  
18  
19  
20  
21  
22  
23  
24  
25  
26  
27  
28  
29  
30  
31  
32  
33  
34  
35  
36  
37  
38  
39  
40  
41  
42  
43  
44  
45  
46  
47  
48  
49

**Table 5.** Adverse genitourinary events: odds ratios (posterior mean with 95% intervals) for each pair-wise comparison of interventions, based on direct evidence alone (lower-left triangle) or direct and indirect evidence (upper-right triangle).

| Intervention                               | Observational management      | Prostatectomy | Conventional radiotherapy     | Conventional radiotherapy-hypofractionated | Conformal LD radiotherapy     | Conformal HD radiotherapy     | Conformal LD radiotherapy-hypofractionated | Cryotherapy      |
|--------------------------------------------|-------------------------------|---------------|-------------------------------|--------------------------------------------|-------------------------------|-------------------------------|--------------------------------------------|------------------|
| Observational management                   |                               | -             | -                             | -                                          | -                             | -                             | -                                          | -                |
| Prostatectomy                              | <sup>2</sup> 2.27 (1.34,3.90) |               | -                             | -                                          | -                             | -                             | -                                          | -                |
| Conventional radiotherapy                  | -                             | -             |                               | 1.00 (0.34,2.90)                           | 0.91 (0.54,1.51)              | 1.19 (0.69,2.11)              | 1.41 (0.49,4.07)                           | 0.66 (0.22,2.00) |
| Conventional radiotherapy-hypofractionated | -                             | -             | <sup>1</sup> 1.01 (0.34,3.00) |                                            | 0.90 (0.27,2.97)              | 1.19 (0.36,4.04)              | 1.41 (0.31,6.44)                           | 0.66 (0.14,3.04) |
| Conformal LD radiotherapy                  | -                             | -             | <sup>2</sup> 0.80 (0.43,1.51) | -                                          |                               | 1.32 (0.97,1.86)              | 1.56 (0.61,4.09)                           | 0.73 (0.21,2.52) |
| Conformal HD radiotherapy                  | -                             | -             | <sup>1</sup> 1.53 (0.62,3.82) | -                                          | <sup>5</sup> 1.28 (0.93,1.86) |                               | 1.18 (0.48,2.92)                           | 0.55 (0.16,1.91) |
| Conformal LD radiotherapy-hypofractionated | -                             | -             | -                             | -                                          | -                             | <sup>2</sup> 1.17 (0.48,2.91) |                                            | 0.47 (0.10,2.15) |
| Cryotherapy                                | -                             | -             | <sup>2</sup> 0.68 (0.22,2.03) | -                                          | -                             | -                             | -                                          |                  |

LD: low dose; HD: high dose.

Lower-left results compare row-defining interventions against column-defining interventions. Upper-right results compare column-defining interventions against row-defining interventions.

The comparison of prostatectomy with observational management was not linked to the rest of the network, so this evidence was included in the meta-analysis of direct comparisons only.

In the meta-analysis of direct comparisons (reported in lower-left triangle), between-trial heterogeneity  $\tau^2$  was estimated as 0.04 (95% interval 0.003 to 0.29). In the network meta-analysis (reported in upper-right triangle), between-trial heterogeneity  $\tau^2$  was estimated as 0.04 (95% interval 0.002 to 0.26).

The small superscript numbers in the cells of lower-left triangle indicate the numbers of randomized trials which compared the two interventions directly.

## DISCUSSION

Our study is mainly a methodological contribution to an area of modern medicine with sparse randomised controlled evidence. We highlight the potential for network meta-analysis to be used for evidence synthesis in this research area, particularly after the forthcoming advent of further randomised controlled trial data. The present state of the evidence is that considering data from 21 trials including 7,350 patients randomly assigned among eight different intervention regimes, we found substantial uncertainty about the relative efficacy and safety of different interventions in respect of the studied outcomes.

Our analyses have several strengths. Using network meta-analysis, we were able to combine simultaneously all relevant evidence on treating patients with localized prostate cancer, even in the absence of direct comparative evidence for some treatment pairs, encompassing four efficacy and safety outcomes. Based on data from 21 trials including 7,350 patients randomly assigned among eight different intervention regimes for localized prostate cancer, we found substantial uncertainty about the relative efficacy and safety of different interventions in respect of the studied outcomes.

Assumptions of consistency between direct and indirect evidence were tested to justify the joint synthesis of all studies; however, these tests had little power due to the relatively small number of trials available in most direct comparisons. Instead we must rely on judgements about the similarity of studies included in the analysis in aspects such as patient groups, outcome measures and study methodology. Although we defined the population of interest as patients with localized prostate cancer, there was heterogeneity between individual study populations in terms of the severity of disease. Some of the trials were conducted several decades ago, when surgery and radiology techniques may have been different, and we observed that stage migration has occurred in men diagnosed with prostate cancer, due to

1  
2  
3 [emerging bio-marker and image technologies. Furthermore, some of the trials used adjuvant](#)  
4 [therapy, although this was applied in all the arms within the trial.](#)

5  
6  
7  
8  
9 [Two further limitations warrant mention. Literature searches were completed in September of](#)  
10 [2012. However, the results of one of the most important randomized trials – ProtecT study<sup>13</sup>](#)  
11 [– has not been published so far, and to our knowledge there are no other new relevant](#)  
12 [RCTs have been reported after this systematic review. Our choices of measurements may](#)  
13 [have favoured some treatments over others: for example the RTOG scale had been used to](#)  
14 [define the late gastrointestinal and late genitourinary toxicity in the included studies, but it](#)  
15 [does not measure incontinence which could be the most common adverse event post-](#)  
16 [prostatectomy.](#)<sup>102</sup>

17  
18  
19  
20  
21  
22  
23  
24  
25  
26  
27 [Methodologically, we used](#) informative prior [distributions](#) based on external evidence for  
28 heterogeneity variances, to increase precision [in their estimation](#) and improve estimation of  
29 treatment differences. [Data-based informative priors have previously been considered by Lu](#)  
30 [& Ades,<sup>101</sup> who used them for the between-study correlation structure. To our knowledge,](#)  
31 [our paper is the first application of network meta-analysis incorporating data-based](#)  
32 [informative priors for between-study](#) heterogeneity.

33  
34  
35  
36  
37  
38  
39  
40  
41 Our findings have implications for research funding prioritisation and study design; and for  
42 clinical practice. The study identified particular ‘weak links’ in the network of comparative  
43 treatment options, which [might](#) be prioritized for future investment in randomized controlled  
44 trials. This is particularly [the case](#) for studies comparing HIFU (which currently is bereft of  
45 any comparative evidence) [or](#) brachytherapy against other treatment options, and also for  
46 trials examining the comparative efficacy and safety of prostatectomy versus conformal  
47 radiotherapy modalities. For clinicians, and for men diagnosed with prostate cancer, our  
48 findings highlight that the optimal treatment options may be different in respect of different  
49 outcomes: patients need to be given appropriate information about the uncertainty  
50  
51  
52  
53  
54  
55  
56  
57  
58  
59  
60

1  
2  
3 surrounding treatment choice currently, and be allowed to opt for 'trade-offs' between  
4 efficacy and safety outcomes as they judge appropriately.<sup>95</sup> Observational studies have  
5 consistently shown that radical prostatectomy has better cause-specific mortality outcomes  
6 compared with radiotherapy.<sup>96-99,103</sup>  
7  
8  
9  
10

11  
12 In conclusion, clinically important information from high quality randomized trials is still  
13 needed to inform decision making regarding primary treatment options for men with localized  
14 prostate cancer. The findings of this study highlight the importance of informed patient  
15 choice and shared-decision making about treatment modality and acceptable trade-offs  
16 between multiple outcomes. The upcoming results of the ProtecT study,<sup>13</sup> which is  
17 evaluating effectiveness of multiple therapies in men with PSA-detected localized prostate  
18 cancer, together with other treatment studies in progress, will hopefully contribute to the  
19 evidence base. It is however unlikely that evidential uncertainty about all relevant and  
20 important outcomes will be resolved by these trials, and an updated network meta-analysis  
21 incorporating new evidence may be useful to synthesize the new with the existing evidence.  
22 We demonstrate a high degree of uncertainty about treatment superiority in the management  
23 of localized prostate cancer. Clinicians and patients need to grapple with this uncertainty in  
24 the context of shared-decision making.  
25  
26  
27  
28  
29  
30  
31  
32  
33  
34  
35  
36  
37  
38  
39  
40  
41  
42  
43  
44  
45  
46  
47  
48  
49  
50  
51  
52  
53  
54  
55  
56  
57  
58  
59  
60

1  
2  
3 **Funding and Financial Disclosure:** TX was funded by the National Institute for Health  
4 Research Health Technology Assessment (NIHR HTA) program (HTA 96/20/99). RT was  
5 supported by Medical Research council grant U105285807. GL was supported by a Post-  
6 Doctoral Fellowship Award of the National Institute for Health Research (PDF-2011-04-047).  
7 The funders had no role in study design, data collection and analysis, decision to publish, or  
8 preparation of the manuscript.  
9  
10  
11

12  
13 **Author Contributions:** TX, RT, GL, and JH conceived and designed the study. TX  
14 performed the literature searches. TX, RT, YW, GL, and JH performed the literature review  
15 and data extraction. TX, RT, YW, GL, and JH analyzed the data. TX wrote the first draft of  
16 the manuscript. TX, RT, YW, DN, GL, and JH contributed to the writing of the manuscript.  
17  
18  
19

20  
21 **Competing Interests:** The authors declare that no competing interests exist.  
22  
23  
24  
25  
26  
27  
28  
29  
30  
31  
32  
33  
34  
35  
36  
37  
38  
39  
40  
41  
42  
43  
44  
45  
46  
47  
48  
49  
50  
51  
52  
53  
54  
55  
56  
57  
58  
59  
60

## REFERENCES

1. Jemal A, Bray F, Center MM, Ferlay J, Ward E, Forman D. Global cancer statistics. *CA Cancer J Clin*. Mar-Apr 2011;61(2):69-90.
2. Ferlay J, Shin HR, Bray F, Forman D, Mathers C, Parkin DM. *GLOBOCAN 2008 v1.2, Cancer Incidence and Mortality Worldwide: IARC CancerBase No. 10*. Lyon, France: International Agency for Research on Cancer; 2010. Available from: <http://globocan.iarc.fr>, accessed on 08 Aug 2011.
3. Cancer Research UK. Prostate cancer - UK incidence statistics. <http://info.cancerresearchuk.org/cancerstats/types/prostate/incidence/>. Accessed 08 Aug, 2011.
4. Howlader N, Noone AM, Krapcho M, Neyman N, Aminou R, Waldron W, Altekruse SF, Kosary CL, Ruhl J, Tatalovich Z, Cho H, Mariotto A, et al. SEER Cancer Statistics Review, 1975-2008, National Cancer Institute. Bethesda, MD, [http://seer.cancer.gov/csr/1975\\_2008/](http://seer.cancer.gov/csr/1975_2008/), based on November 2010 SEER data submission, posted to the SEER web site. 2011.
5. National Cancer Institute. Prostate Cancer. <http://www.cancer.gov/cancertopics/types/prostate>. Accessed 08 Aug, 2011.
6. National Cancer Institute. Cancer advances in focus - prostate cancer. <http://www.cancer.gov/cancertopics/factsheet/cancer-advances-in-focus/prostate>. Accessed 08 Aug, 2011.
7. Lyratzopoulos G, Barbiere JM, Greenberg DC, Wright KA, Neal DE. Population based time trends and socioeconomic variation in use of radiotherapy and radical surgery for prostate cancer in a UK region: continuous survey. *BMJ*. 2010;340:c1928.
8. *National Collaborating Centre for Cancer. NICE clinical guideline 58. Prostate cancer: diagnosis and treatment. Evidence review*. London: National Institute for Health and Clinical Excellence; 2008.
9. Heidenreich A, Bastian PJ, Bellmunt J, Bolla M, Joniau S, Mason MD, Matveev V, Mottet N, van der Kwast TH, Wiegel T, Zattoni F. *Guidelines on prostate cancer*. European Association of Urology; 2012.
10. Thompson I, Thrasher JB, Aus G, Burnett AL, Canby-Hagino ED, Cookson MS, D'Amico AV, Dmochowski RR, Eton DT, Forman JD, Goldenberg SL, Hernandez J, et al. *Guideline for the Management of Clinically Localized Prostate Cancer: 2007 Update*. American Urological Association; 2011.
11. Andersson SO, Andren O, Lyth J, Stark JR, Henriksson M, Adami HO, Carlsson P, Johansson JE. Managing localized prostate cancer by radical prostatectomy or watchful waiting: Cost analysis of a randomized trial (SPCG-4). *Scand J Urol Nephrol*. Apr 2011;45(3):177-183.
12. Wilt TJ, Brawer MK, Barry MJ, Jones KM, Kwon Y, Gingrich JR, Aronson WJ, Nsouli I, Iyer P, Cartagena R, Snider G, Roehrborn C, et al. The Prostate cancer Intervention Versus Observation Trial:VA/NCI/AHRQ Cooperative Studies Program #407 (PIVOT): design and baseline results of a randomized controlled trial comparing radical prostatectomy to watchful waiting for men with clinically localized prostate cancer. *Contemp Clin Trials*. Jan 2009;30(1):81-87.



- 1  
2  
3 13. Donovan J, Mills N, Smith M, Brindle L, Jacoby A, Peters T, Frankel S, Neal D,  
4 Hamdy F. Quality improvement report: Improving design and conduct of randomised  
5 trials by embedding them in qualitative research: ProtecT (prostate testing for cancer  
6 and treatment) study. Commentary: presenting unbiased information to patients can  
7 be difficult. *BMJ*. Oct 5 2002;325(7367):766-770.  
8  
9 14. Caldwell DM, Ades AE, Higgins JP. Simultaneous comparison of multiple treatments:  
10 combining direct and indirect evidence. *BMJ*. Oct 15 2005;331(7521):897-900.  
11  
12 15. Lu G, Ades AE. Combination of direct and indirect evidence in mixed treatment  
13 comparisons. *Stat Med*. Oct 30 2004;23(20):3105-3124.  
14  
15 16. Salanti G, Higgins JP, Ades AE, Ioannidis JP. Evaluation of networks of randomized  
16 trials. *Stat Methods Med Res*. Jun 2008;17(3):279-301.  
17  
18 17. Higgins JPT, Green S. *Cochrane Handbook for Systematic Reviews of Interventions*  
19 *Version 5.1.0 [updated March 2011]*. The Cochrane Collaboration. Available from  
20 [www.cochrane-handbook.org](http://www.cochrane-handbook.org); 2011.  
21  
22 18. Higgins JP, Altman DG, Gotzsche PC, Juni P, Moher D, Oxman AD, Savovic J,  
23 Schulz KF, Weeks L, Sterne JA. The Cochrane Collaboration's tool for assessing risk  
24 of bias in randomised trials. *BMJ*. 2011;343:d5928.  
25  
26 19. Pilepich MV, Krall JM, Sause WT, Johnson RJ, Russ HH, Hanks GE, Perez CA,  
27 Zininger M, Martz KL, Gardner P. Correlation of radiotherapeutic parameters and  
28 treatment related morbidity in carcinoma of the prostate--analysis of RTOG study 75-  
29 06. *Int J Radiat Oncol Biol Phys*. Mar 1987;13(3):351-357.  
30  
31 20. Nielsen ME, Makarov DV, Humphreys E, Mangold L, Partin AW, Walsh PC. Is it  
32 possible to compare PSA recurrence-free survival after surgery and radiotherapy  
33 using revised ASTRO criterion--"nadir + 2"? *Urology*. Aug 2008;72(2):389-393;  
34 discussion 394-385.  
35  
36 21. Smith TC, Spiegelhalter DJ, Thomas A. Bayesian approaches to random-effects  
37 meta-analysis: a comparative study. *Stat Med*. Dec 30 1995;14(24):2685-2699.  
38  
39 22. Dias S, Welton NJ, Sutton AJ, Ades AE. NICE DSU Technical Support Document 2:  
40 A Generalised Linear Modelling Framework for Pairwise and Network Meta-Analysis  
41 of Randomised Controlled Trials. 2011; <http://www.nicedsu.org.uk>. Accessed April,  
42 2012.  
43  
44 23. Lunn DJ, Thomas A, Best N, Spiegelhalter D. WinBUGS - A Bayesian modelling  
45 framework: Concepts, structure, and extensibility. *Stat Comput*. Oct 2000;10(4):325-  
46 337.  
47  
48 24. Turner RM, Davey J, Clarke MJ, Thompson SG, Higgins JPT. Predicting the extent of  
49 heterogeneity in meta-analysis, using empirical data from the Cochrane Database of  
50 Systematic Reviews. *International Journal of Epidemiology*. in press.  
51  
52 25. Salanti G, Ades AE, Ioannidis JP. Graphical methods and numerical summaries for  
53 presenting results from multiple-treatment meta-analysis: an overview and tutorial. *J*  
54 *Clin Epidemiol*. Feb 2011;64(2):163-171.  
55  
56 26. Akakura K, Suzuki H, Ichikawa T, Fujimoto H, Maeda O, Usami M, Hirano D,  
57 Takimoto Y, Kamoto T, Ogawa O, Sumiyoshi Y, Shimazaki J, et al. A randomized  
58  
59  
60

- 1  
2  
3 trial comparing radical prostatectomy plus endocrine therapy versus external beam  
4 radiotherapy plus endocrine therapy for locally advanced prostate cancer: results at  
5 median follow-up of 102 months. *Jpn J Clin Oncol*. Dec 2006;36(12):789-793.  
6
- 7 **27.** Bill-Axelsson A, Holmberg L, Ruutu M, Haggman M, Andersson SO, Bratell S,  
8 Spangberg A, Busch C, Nordling S, Garmo H, Palmgren J, Adami HO, et al. Radical  
9 prostatectomy versus watchful waiting in early prostate cancer. *N Engl J Med*. May  
10 12 2005;352(19):1977-1984.  
11
- 12 **28.** Chin JL, Ng CK, Touma NJ, Pus NJ, Hardie R, Abdelhady M, Rodrigues G, Radwan  
13 J, Venkatesan V, Moussa M, Downey DB, Bauman G. Randomized trial comparing  
14 cryoablation and external beam radiotherapy for T2C-T3B prostate cancer. *Prostate  
15 Cancer Prostatic Dis*. 2008;11(1):40-45.  
16
- 17 **29.** Dearnaley DP, Hall E, Lawrence D, Huddart RA, Eeles R, Nutting CM, Gadd J,  
18 Warrington A, Bidmead M, Horwich A. Phase III pilot study of dose escalation using  
19 conformal radiotherapy in prostate cancer: PSA control and side effects. *Br J Cancer*.  
20 Feb 14 2005;92(3):488-498.  
21
- 22 **30.** Dearnaley DP, Khoo VS, Norman AR, Meyer L, Nahum A, Tait D, Yarnold J, Horwich  
23 A. Comparison of radiation side-effects of conformal and conventional radiotherapy in  
24 prostate cancer: a randomised trial. *Lancet*. Jan 23 1999;353(9149):267-272.  
25
- 26 **31.** Dearnaley DP, Sydes MR, Graham JD, Aird EG, Bottomley D, Cowan RA, Huddart  
27 RA, Jose CC, Matthews JH, Millar J, Moore AR, Morgan RC, et al. Escalated-dose  
28 versus standard-dose conformal radiotherapy in prostate cancer: first results from the  
29 MRC RT01 randomised controlled trial. *Lancet Oncol*. Jun 2007;8(6):475-487.  
30
- 31 **32.** Dearnaley DP, Sydes MR, Langley RE, Graham JD, Huddart RA, Syndikus I,  
32 Matthews JH, Scrase CD, Jose CC, Logue J, Stephens RJ. The early toxicity of  
33 escalated versus standard dose conformal radiotherapy with neo-adjuvant androgen  
34 suppression for patients with localised prostate cancer: results from the MRC RT01  
35 trial (ISRCTN47772397). *Radiother Oncol*. Apr 2007;83(1):31-41.  
36
- 37 **33.** Donnelly B, Saliken J, Brasher P, Ernst D, Lau H, Rewcastle J, Trpkov KA.  
38 Randomized Trial of External Beam Radiotherapy Versus Cryoablation in Patients  
39 with Localized Prostate Cancer. The American Urological Association Annual  
40 Meeting. Abstract 1141. 2007.  
41
- 42 **34.** Graverson PH, Nielsen KT, Gasser TC, Corle DK, Madsen PO. Radical  
43 prostatectomy versus expectant primary treatment in stages I and II prostatic cancer.  
44 A fifteen-year follow-up. *Urology*. Dec 1990;36(6):493-498.  
45
- 46 **35.** Koper PC, Jansen P, van Putten W, van Os M, Wijnmaalen AJ, Lebesque JV,  
47 Levendag PC. Gastro-intestinal and genito-urinary morbidity after 3D conformal  
48 radiotherapy of prostate cancer: observations of a randomized trial. *Radiother Oncol*.  
49 Oct 2004;73(1):1-9.  
50
- 51 **36.** Koper PC, Stroom JC, van Putten WL, Korevaar GA, Heijmen BJ, Wijnmaalen A,  
52 Jansen PP, Hanssens PE, Griep C, Krol AD, Samson MJ, Levendag PC. Acute  
53 morbidity reduction using 3DCRT for prostate carcinoma: a randomized study. *Int J  
54 Radiat Oncol Biol Phys*. Mar 1 1999;43(4):727-734.  
55
- 56 **37.** Lukka H, Hayter C, Julian JA, Warde P, Morris WJ, Gospodarowicz M, Levine M,  
57 Sathya J, Choo R, Prichard H, Brundage M, Kwan W. Randomized trial comparing  
58  
59  
60

- 1  
2  
3 two fractionation schedules for patients with localized prostate cancer. *J Clin Oncol*.  
4 Sep 1 2005;23(25):6132-6138.  
5  
6 **38.** Paulson DF, Lin GH, Hinshaw W, Stephani S. Radical surgery versus radiotherapy  
7 for adenocarcinoma of the prostate. *J Urol*. Sep 1982;128(3):502-504.  
8  
9 **39.** Peeters ST, Heemsbergen WD, Koper PC, van Putten WL, Slot A, Dielwart MF,  
10 Bonfrer JM, Incrocci L, Lebesque JV. Dose-response in radiotherapy for localized  
11 prostate cancer: results of the Dutch multicenter randomized phase III trial comparing  
12 68 Gy of radiotherapy with 78 Gy. *J Clin Oncol*. May 1 2006;24(13):1990-1996.  
13  
14 **40.** Pollack A, Hanlon AL, Horwitz EM, Feigenberg SJ, Konski AA, Movsas B, Greenberg  
15 RE, Uzzo RG, Ma CM, McNeeley SW, Buyyounouski MK, Price RA, Jr. Dosimetry  
16 and preliminary acute toxicity in the first 100 men treated for prostate cancer on a  
17 randomized hypofractionation dose escalation trial. *Int J Radiat Oncol Biol Phys*. Feb  
18 1 2006;64(2):518-526.  
19  
20 **41.** Pollack A, Zagars GK, Starkschall G, Antolak JA, Lee JJ, Huang E, von Eschenbach  
21 AC, Kuban DA, Rosen I. Prostate cancer radiation dose response: results of the M. D.  
22 Anderson phase III randomized trial. *Int J Radiat Oncol Biol Phys*. Aug 1  
23 2002;53(5):1097-1105.  
24  
25 **42.** Steineck G, Helgesen F, Adolfsson J, Dickman PW, Johansson JE, Norlen BJ,  
26 Holmberg L. Quality of life after radical prostatectomy or watchful waiting. *N Engl J*  
27 *Med*. Sep 12 2002;347(11):790-796.  
28  
29 **43.** Storey MR, Pollack A, Zagars G, Smith L, Antolak J, Rosen I. Complications from  
30 radiotherapy dose escalation in prostate cancer: preliminary results of a randomized  
31 trial. *Int J Radiat Oncol Biol Phys*. Oct 1 2000;48(3):635-642.  
32  
33 **44.** Tait DM, Nahum AE, Meyer LC, Law M, Dearnaley DP, Horwich A, Mayles WP,  
34 Yarnold JR. Acute toxicity in pelvic radiotherapy; a randomised trial of conformal  
35 versus conventional treatment. *Radiother Oncol*. Feb 1997;42(2):121-136.  
36  
37 **45.** Yeoh EE, Fraser RJ, McGowan RE, Botten RJ, Di Matteo AC, Roos DE, Penniment  
38 MG, Borg MF. Evidence for efficacy without increased toxicity of hypofractionated  
39 radiotherapy for prostate carcinoma: early results of a Phase III randomized trial. *Int J*  
40 *Radiat Oncol Biol Phys*. Mar 15 2003;55(4):943-955.  
41  
42 **46.** Al-Mamgani A, van Putten WL, Heemsbergen WD, van Leenders GJ, Slot A, Dielwart  
43 MF, Incrocci L, Lebesque JV. Update of Dutch multicenter dose-escalation trial of  
44 radiotherapy for localized prostate cancer. *Int J Radiat Oncol Biol Phys*. Nov 15  
45 2008;72(4):980-988.  
46  
47 **47.** Al-Mamgani A, van Putten WL, van der Wielen GJ, Levendag PC, Incrocci L. Dose  
48 escalation and quality of life in patients with localized prostate cancer treated with  
49 radiotherapy: long-term results of the Dutch randomized dose-escalation trial (CKTO  
50 96-10 trial). *Int J Radiat Oncol Biol Phys*. Mar 15 2011;79(4):1004-1012.  
51  
52 **48.** Arcangeli G, Fowler J, Gomellini S, Arcangeli S, Saracino B, Petrongari MG, Benassi  
53 M, Strigari L. Acute and late toxicity in a randomized trial of conventional versus  
54 hypofractionated three-dimensional conformal radiotherapy for prostate cancer. *Int J*  
55 *Radiat Oncol Biol Phys*. Mar 15 2011;79(4):1013-1021.  
56  
57  
58  
59  
60

- 1  
2  
3  
4  
5  
6  
7  
8  
9  
10  
11  
12  
13  
14  
15  
16  
17  
18  
19  
20  
21  
22  
23  
24  
25  
26  
27  
28  
29  
30  
31  
32  
33  
34  
35  
36  
37  
38  
39  
40  
41  
42  
43  
44  
45  
46  
47  
48  
49  
50  
51  
52  
53  
54  
55  
56  
57  
58  
59  
60
49. Arcangeli G, Saracino B, Gomellini S, Petrongari MG, Arcangeli S, Sentinelli S, Marzi S, Landoni V, Fowler J, Strigari L. A prospective phase III randomized trial of hypofractionation versus conventional fractionation in patients with high-risk prostate cancer. *Int J Radiat Oncol Biol Phys*. Sep 1 2010;78(1):11-18.
50. Beckendorf V, Guerif S, Le Prise E, Cosset JM, Bougnoux A, Chauvet B, Salem N, Chapet O, Bourdain S, Bachaud JM, Maingon P, Hannoun-Levi JM, et al. 70 Gy versus 80 Gy in localized prostate cancer: 5-year results of GETUG 06 randomized trial. *Int J Radiat Oncol Biol Phys*. Jul 15 2011;80(4):1056-1063.
51. Beckendorf V, Guerif S, Le Prise E, Cosset JM, Lefloch O, Chauvet B, Salem N, Chapet O, Bourdin S, Bachaud JM, Maingon P, Lagrange JL, et al. The GETUG 70 Gy vs. 80 Gy randomized trial for localized prostate cancer: feasibility and acute toxicity. *Int J Radiat Oncol Biol Phys*. Nov 15 2004;60(4):1056-1065.
52. Bill-Axelson A, Holmberg L, Filen F, Ruutu M, Garmo H, Busch C, Nordling S, Haggman M, Andersson SO, Bratell S, Spangberg A, Palmgren J, et al. Radical prostatectomy versus watchful waiting in localized prostate cancer: the Scandinavian prostate cancer group-4 randomized trial. *J Natl Cancer Inst*. Aug 20 2008;100(16):1144-1154.
53. Bill-Axelson A, Holmberg L, Ruutu M, Garmo H, Stark JR, Busch C, Nordling S, Haggman M, Andersson SO, Bratell S, Spangberg A, Palmgren J, et al. Radical prostatectomy versus watchful waiting in early prostate cancer. *N Engl J Med*. May 5 2011;364(18):1708-1717.
54. Dearnaley D, Syndikus I, Sumo G, Bidmead M, Bloomfield D, Clark C, Gao A, Hassan S, Horwich A, Huddart R, Khoo V, Kirkbride P, et al. Conventional versus hypofractionated high-dose intensity-modulated radiotherapy for prostate cancer: preliminary safety results from the CHHiP randomised controlled trial. *Lancet Oncol*. Jan 2012;13(1):43-54.
55. Donnelly BJ, Saliken JC, Brasher PM, Ernst SD, Rewcastle JC, Lau H, Robinson J, Trpkov K. A randomized trial of external beam radiotherapy versus cryoablation in patients with localized prostate cancer. *Cancer*. Jan 15 2010;116(2):323-330.
56. Giberti C, Chiono L, Gallo F, Schenone M, Gastaldi E. Radical retropubic prostatectomy versus brachytherapy for low-risk prostatic cancer: a prospective study. *World J Urol*. Oct 2009;27(5):607-612.
57. Heemsbergen WD, Hoogeman MS, Witte MG, Peeters ST, Incrocci L, Lebesque JV. Increased risk of biochemical and clinical failure for prostate patients with a large rectum at radiotherapy planning: results from the Dutch trial of 68 GY versus 78 Gy. *Int J Radiat Oncol Biol Phys*. Apr 1 2007;67(5):1418-1424.
58. Johansson E, Bill-Axelson A, Holmberg L, Onelov E, Johansson JE, Steineck G. Time, symptom burden, androgen deprivation, and self-assessed quality of life after radical prostatectomy or watchful waiting: the Randomized Scandinavian Prostate Cancer Group Study Number 4 (SPCG-4) clinical trial. *Eur Urol*. Feb 2009;55(2):422-430.
59. Johansson E, Steineck G, Holmberg L, Johansson JE, Nyberg T, Ruutu M, Bill-Axelson A. Long-term quality-of-life outcomes after radical prostatectomy or watchful waiting: the Scandinavian Prostate Cancer Group-4 randomised trial. *Lancet Oncol*. Sep 2011;12(9):891-899.

- 1  
2  
3  
4  
5  
6  
7  
8  
9  
10  
11  
12  
13  
14  
15  
16  
17  
18  
19  
20  
21  
22  
23  
24  
25  
26  
27  
28  
29  
30  
31  
32  
33  
34  
35  
36  
37  
38  
39  
40  
41  
42  
43  
44  
45  
46  
47  
48  
49  
50  
51  
52  
53  
54  
55  
56  
57  
58  
59  
60
60. Kuban DA, Levy LB, Cheung MR, Lee AK, Choi S, Frank S, Pollack A. Long-term failure patterns and survival in a randomized dose-escalation trial for prostate cancer. Who dies of disease? *Int J Radiat Oncol Biol Phys.* Apr 1 2011;79(5):1310-1317.
61. Kuban DA, Tucker SL, Dong L, Starkschall G, Huang EH, Cheung MR, Lee AK, Pollack A. Long-term results of the M. D. Anderson randomized dose-escalation trial for prostate cancer. *Int J Radiat Oncol Biol Phys.* Jan 1 2008;70(1):67-74.
62. Marzi S, Saracino B, Petrongari MG, Arcangeli S, Gomellini S, Arcangeli G, Benassi M, Landoni V. Modeling of alpha/beta for late rectal toxicity from a randomized phase II study: conventional versus hypofractionated scheme for localized prostate cancer. *J Exp Clin Cancer Res.* 2009;28:117.
63. Norkus D, Miller A, Kurtinaitis J, Haverkamp U, Popov S, Prott FJ, Valuckas KP. A randomized trial comparing hypofractionated and conventionally fractionated three-dimensional external-beam radiotherapy for localized prostate adenocarcinoma : a report on acute toxicity. *Strahlenther Onkol.* Nov 2009;185(11):715-721.
64. Norkus D, Miller A, Plieskiene A, Janulionis E, Valuckas KP. A randomized trial comparing hypofractionated and conventionally fractionated three-dimensional conformal external-beam radiotherapy for localized prostate adenocarcinoma: a report on the first-year biochemical response. *Medicina (Kaunas).* 2009;45(6):469-475.
65. Peeters ST, Heemsbergen WD, van Putten WL, Slot A, Tabak H, Mens JW, Lebesque JV, Koper PC. Acute and late complications after radiotherapy for prostate cancer: results of a multicenter randomized trial comparing 68 Gy to 78 Gy. *Int J Radiat Oncol Biol Phys.* Mar 15 2005;61(4):1019-1034.
66. Peeters ST, Lebesque JV, Heemsbergen WD, van Putten WL, Slot A, Dielwart MF, Koper PC. Localized volume effects for late rectal and anal toxicity after radiotherapy for prostate cancer. *Int J Radiat Oncol Biol Phys.* Mar 15 2006;64(4):1151-1161.
67. Robinson JW, Donnelly BJ, Siever JE, Saliken JC, Ernst SD, Rewcastle JC, Trpkov K, Lau H, Scott C, Thomas B. A randomized trial of external beam radiotherapy versus cryoablation in patients with localized prostate cancer: quality of life outcomes. *Cancer.* Oct 15 2009;115(20):4695-4704.
68. Syndikus I, Morgan RC, Sydes MR, Graham JD, Dearnaley DP. Late gastrointestinal toxicity after dose-escalated conformal radiotherapy for early prostate cancer: results from the UK Medical Research Council RT01 trial (ISRCTN47772397). *Int J Radiat Oncol Biol Phys.* Jul 1 2010;77(3):773-783.
69. van der Wielen GJ, Hoogeman MS, Dohle GR, van Putten WL, Incrocci L. Dose-volume parameters of the corpora cavernosa do not correlate with erectile dysfunction after external beam radiotherapy for prostate cancer: results from a dose-escalation trial. *Int J Radiat Oncol Biol Phys.* Jul 1 2008;71(3):795-800.
70. Wilt TJ, Brawer MK, Jones KM, Barry MJ, Aronson WJ, Fox S, Gingrich JR, Wei JT, Gilhooly P, Grob BM, Nsouli I, Iyer P, et al. Radical prostatectomy versus observation for localized prostate cancer. *N Engl J Med.* Jul 19 2012;367(3):203-213.
71. Yeoh EE, Botten RJ, Butters J, Di Matteo AC, Holloway RH, Fowler J. Hypofractionated versus conventionally fractionated radiotherapy for prostate



- 1  
2  
3 carcinoma: final results of phase III randomized trial. *Int J Radiat Oncol Biol Phys*.  
4 Dec 1 2011;81(5):1271-1278.  
5  
6 **72.** Yeoh EE, Holloway RH, Fraser RJ, Botten RJ, Di Matteo AC, Butters J, Weerasinghe  
7 S, Abeysinghe P. Hypofractionated versus conventionally fractionated radiation  
8 therapy for prostate carcinoma: updated results of a phase III randomized trial. *Int J*  
9 *Radiat Oncol Biol Phys*. Nov 15 2006;66(4):1072-1083.  
10  
11 **73.** Yeoh EK, Holloway RH, Fraser RJ, Botten R, Di Matteo A, Moore JW, Schoeman MN,  
12 Bartholomeusz DL. Anorectal function after three- versus two-dimensional radiation  
13 therapy for carcinoma of the prostate. *Int J Radiat Oncol Biol Phys*. Jan 1  
14 2009;73(1):46-52.  
15  
16 **74.** Zietman AL, Bae K, Slater JD, Shipley WU, Efstathiou JA, Coen JJ, Bush DA, Lunt M,  
17 Spiegel DY, Skowronski R, Jabola BR, Rossi CJ. Randomized trial comparing  
18 conventional-dose with high-dose conformal radiation therapy in early-stage  
19 adenocarcinoma of the prostate: long-term results from proton radiation oncology  
20 group/american college of radiology 95-09. *J Clin Oncol*. Mar 1 2010;28(7):1106-  
21 1111.  
22  
23 **75.** Zietman AL, DeSilvio ML, Slater JD, Rossi CJ, Jr., Miller DW, Adams JA, Shipley WU.  
24 Comparison of conventional-dose vs high-dose conformal radiation therapy in  
25 clinically localized adenocarcinoma of the prostate: a randomized controlled trial.  
26 *JAMA*. Sep 14 2005;294(10):1233-1239.  
27  
28 **76.** Widmark A. Prospective Randomized Trial Comparing External Beam Radiotherapy  
29 versus Watchful Waiting in Early Prostate Cancer (T1b-T2, pN0, Grade 1-2, M0).  
30 *2011 annual meeting of the American Society for Therapeutic Radiology And*  
31 *Oncology, ASTRO*. <http://www.oncolink.org/conferences/article.cfm?id=2171&ss=350>.  
32 2011.  
33  
34 **77.** Fransson P, Damber JE, Tomic R, Modig H, Nyberg G, Widmark A. Quality of life  
35 and symptoms in a randomized trial of radiotherapy versus deferred treatment of  
36 localized prostate carcinoma. *Cancer*. Dec 15 2001;92(12):3111-3119.  
37  
38 **78.** Fransson P, Damber JE, Widmark A. Health-related quality of life 10 years after  
39 external beam radiotherapy or watchful waiting in patients with localized prostate  
40 cancer. *Scand J Urol Nephrol*. 2009;43(2):119-126.  
41  
42 **79.** Bannuru RR, Dvorak T, Obadan N, Yu WW, Patel K, Chung M, Ip S. Comparative  
43 evaluation of radiation treatments for clinically localized prostate cancer: an updated  
44 systematic review. *Ann Intern Med*. Aug 2 2011;155(3):171-178.  
45  
46 **80.** Hegarty J, Beirne PV, Walsh E, Comber H, Fitzgerald T, Wallace Kazer M. Radical  
47 prostatectomy versus watchful waiting for prostate cancer. *Cochrane Database Syst*  
48 *Rev*. 2010;11:CD006590.  
49  
50 **81.** Hummel S, Simpson EL, Hemingway P, Stevenson MD, Rees A. Intensity-modulated  
51 radiotherapy for the treatment of prostate cancer: a systematic review and economic  
52 evaluation. *Health Technol Assess*. Oct 2010;14(47):1-108, iii-iv.  
53  
54 **82.** Koukourakis G, Kelekis N, Armonis V, Kouloulis V. Brachytherapy for prostate  
55 cancer: a systematic review. *Adv Urol*. 2009:327945.  
56  
57  
58  
59  
60

- 1  
2  
3 **83.** Morris DE, Emami B, Mauch PM, Konski AA, Tao ML, Ng AK, Klein EA, Mohideen N, Hurwitz MD, Fraas BA, Roach M, 3rd, Gore EM, et al. Evidence-based review of three-dimensional conformal radiotherapy for localized prostate cancer: an ASTRO outcomes initiative. *Int J Radiat Oncol Biol Phys*. May 1 2005;62(1):3-19.
- 4  
5  
6  
7  
8 **84.** Olsen DR, Bruland OS, Frykholm G, Norderhaug IN. Proton therapy - a systematic review of clinical effectiveness. *Radiother Oncol*. May 2007;83(2):123-132.
- 9  
10  
11 **85.** Pasquier D, Ballereau C. Adjuvant and salvage radiotherapy after prostatectomy for prostate cancer: a literature review. *Int J Radiat Oncol Biol Phys*. Nov 15 2008;72(4):972-979.
- 12  
13  
14  
15 **86.** Peinemann F, Grouven U, Bartel C, Sauerland S, Borchers H, Pinkawa M, Heidenreich A, Lange S. Permanent interstitial low-dose-rate brachytherapy for patients with localised prostate cancer: a systematic review of randomised and nonrandomised controlled clinical trials. *Eur Urol*. Nov 2011;60(5):881-893.
- 16  
17  
18  
19  
20 **87.** Peinemann F, Grouven U, Hemkens LG, Bartel C, Borchers H, Pinkawa M, Heidenreich A, Sauerland S. Low-dose rate brachytherapy for men with localized prostate cancer. *Cochrane Database Syst Rev*. 2011(7):CD008871.
- 21  
22  
23  
24 **88.** Pieters BR, de Back DZ, Koning CC, Zwinderman AH. Comparison of three radiotherapy modalities on biochemical control and overall survival for the treatment of prostate cancer: a systematic review. *Radiother Oncol*. Nov 2009;93(2):168-173.
- 25  
26  
27  
28 **89.** Shelley M, Wilt TJ, Coles B, Mason MD. Cryotherapy for localised prostate cancer. *Cochrane Database Syst Rev*. 2007(3):CD005010.
- 29  
30  
31 **90.** Staffurth J. A review of the clinical evidence for intensity-modulated radiotherapy. *Clin Oncol (R Coll Radiol)*. Oct 2010;22(8):643-657.
- 32  
33  
34 **91.** van Tol-Geerdink JJ, Stalmeier PF, Pasker-de Jong PC, Huizenga H, van Lin EN, Schimmel EC, Leer JW, van Daal WA. Systematic review of the effect of radiation dose on tumor control and morbidity in the treatment of prostate cancer by 3D-CRT. *Int J Radiat Oncol Biol Phys*. Feb 1 2006;64(2):534-543.
- 35  
36  
37  
38  
39 **92.** Viani GA, da Silva LG, Stefano EJ. High-dose conformal radiotherapy reduces prostate cancer-specific mortality: results of a meta-analysis. *Int J Radiat Oncol Biol Phys*. Aug 1 2012;83(5):e619-625.
- 40  
41  
42  
43 **93.** Viani GA, Stefano EJ, Afonso SL. Higher-than-conventional radiation doses in localized prostate cancer treatment: a meta-analysis of randomized, controlled trials. *Int J Radiat Oncol Biol Phys*. Aug 1 2009;74(5):1405-1418.
- 44  
45  
46  
47 **94.** Wilt TJ, MacDonald R, Rutks I, Shamlivan TA, Taylor BC, Kane RL. Systematic review: comparative effectiveness and harms of treatments for clinically localized prostate cancer. *Ann Intern Med*. Mar 18 2008;148(6):435-448.
- 48  
49  
50  
51 **95.** Sajid S, Kotwal AA, Dale W. Interventions to improve decision making and reduce racial and ethnic disparities in the management of prostate cancer: a systematic review. *J Gen Intern Med*. Aug 2012;27(8):1068-1078.
- 52  
53  
54  
55 **96.** Abdollah F, Schmitges J, Sun M, Jeldres C, Tian Z, Briganti A, Shariat SF, Perrotte P, Montorsi F, Karakiewicz PI. Comparison of mortality outcomes after radical
- 56  
57  
58  
59  
60

- 1  
2  
3 prostatectomy versus radiotherapy in patients with localized prostate cancer: a  
4 population-based analysis. *Int J Urol*. Sep 2012;19(9):836-844; author reply 844-835.  
5  
6 **97.** Boorjian SA, Karnes RJ, Viterbo R, Rangel LJ, Bergstralh EJ, Horwitz EM, Blute ML,  
7 Buyyounouski MK. Long-term survival after radical prostatectomy versus external-  
8 beam radiotherapy for patients with high-risk prostate cancer. *Cancer*. Jul 1  
9 2011;117(13):2883-2891.  
10  
11 **98.** Cooperberg MR, Vickers AJ, Broering JM, Carroll PR. Comparative risk-adjusted  
12 mortality outcomes after primary surgery, radiotherapy, or androgen-deprivation  
13 therapy for localized prostate cancer. *Cancer*. Nov 15 2010;116(22):5226-5234.  
14  
15 **99.** Zelefsky MJ, Eastham JA, Cronin AM, Fuks Z, Zhang Z, Yamada Y, Vickers A,  
16 Scardino PT. Metastasis after radical prostatectomy or external beam radiotherapy  
17 for patients with clinically localized prostate cancer: a comparison of clinical cohorts  
18 adjusted for case mix. *J Clin Oncol*. Mar 20 2010;28(9):1508-1513.  
19  
20 **100.** Lu G, Ades AE. Assessing evidence inconsistency in mixed treatment comparisons.  
21 *Journal of the American Statistical Association*, 2006;101(474), 447-459.  
22  
23 **101.** Lu G, Ades AE. Modeling between-trial variance structure in mixed treatment  
24 comparisons. *Biostatistics*, 2009;10(4), 792-805.  
25  
26 **102.** Resnick MJ, Koyama T, Fan KH, Albertsen PC, Goodman M, Hamilton AS, Hoffman  
27 RM, Potosky AL, Stanford JL, Stroup AM, Van Horn RL, Penson DF. Long-term  
28 functional outcomes after treatment for localized prostate cancer. *N Engl J Med*,  
29 2013;368(5):436-45.  
30  
31 **103.** Sooriakumaran P1, Nyberg T, Akre O, Haendler L, Heus I, Olsson M, Carlsson S,  
32 Roobol MJ, Steineck G, Wiklund P. Comparative effectiveness of radical  
33 prostatectomy and radiotherapy in prostate cancer: observational study of mortality  
34 outcomes. *BMJ*. 2014 Feb 26;348:g1502. doi: 10.1136/bmj.g1502.  
35  
36  
37  
38  
39  
40  
41  
42  
43  
44  
45  
46  
47  
48  
49  
50  
51  
52  
53  
54  
55  
56  
57  
58  
59  
60



1  
2  
3  
4  
5  
6  
7  
8  
9  
10  
11  
12  
13  
14  
15  
16  
17  
18  
19  
20  
21  
22  
23  
24  
25  
26  
27  
28  
29  
30  
31  
32  
33  
34  
35  
36  
37  
38  
39  
40  
41  
42  
43  
44  
45  
46  
47  
48  
49  
50  
51  
52  
53  
54  
55  
56  
57  
58  
59  
60

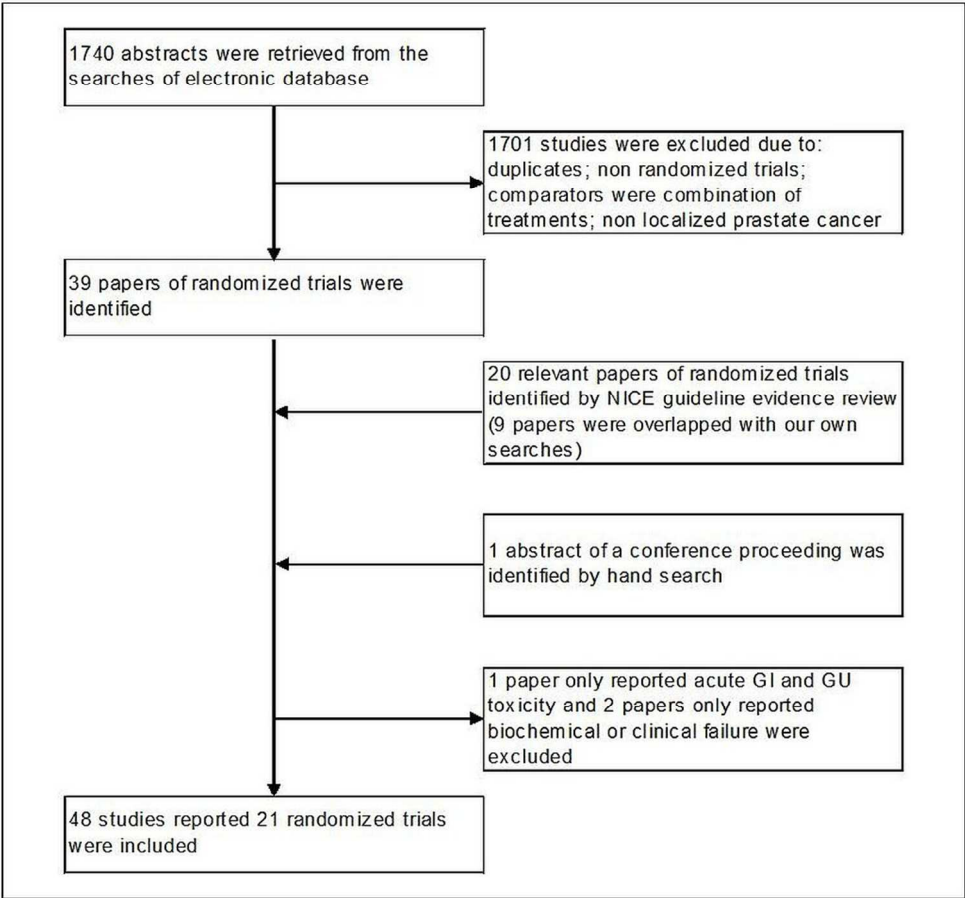

90x83mm (300 x 300 DPI)

only

1  
2  
3  
4  
5  
6  
7  
8  
9  
10  
11  
12  
13  
14  
15  
16  
17  
18  
19  
20  
21  
22  
23  
24  
25  
26  
27  
28  
29  
30  
31  
32  
33  
34  
35  
36  
37  
38  
39  
40  
41  
42  
43  
44  
45  
46  
47  
48  
49  
50  
51  
52  
53  
54  
55  
56  
57  
58  
59  
60

Figure 2. Risk of bias assessments for the included randomized trials

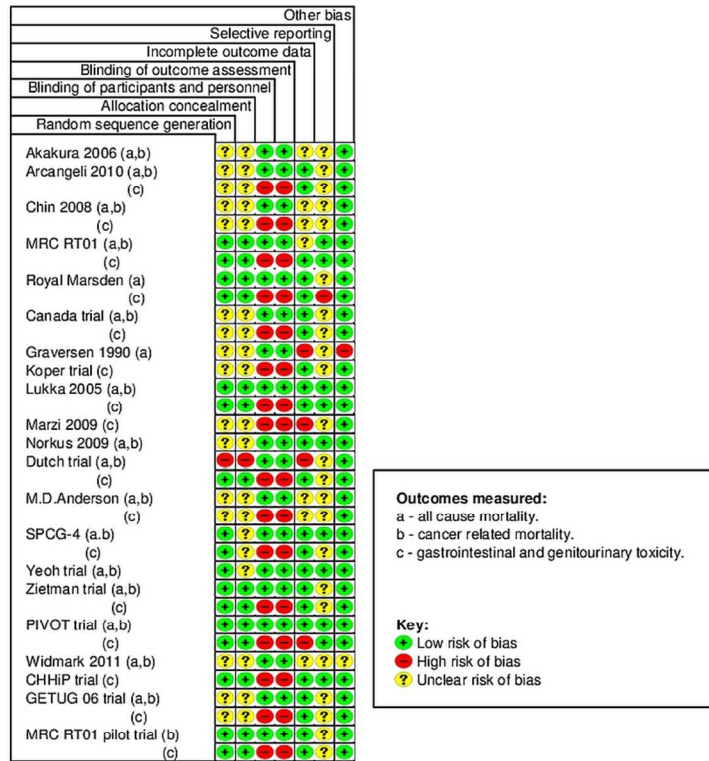

90x116mm (300 x 300 DPI)

1  
2  
3  
4  
5  
6  
7  
8  
9  
10  
11  
12  
13  
14  
15  
16  
17  
18  
19  
20  
21  
22  
23  
24  
25  
26  
27  
28  
29  
30  
31  
32  
33  
34  
35  
36  
37  
38  
39  
40  
41  
42  
43  
44  
45  
46  
47  
48  
49  
50  
51  
52  
53  
54  
55  
56  
57  
58  
59  
60

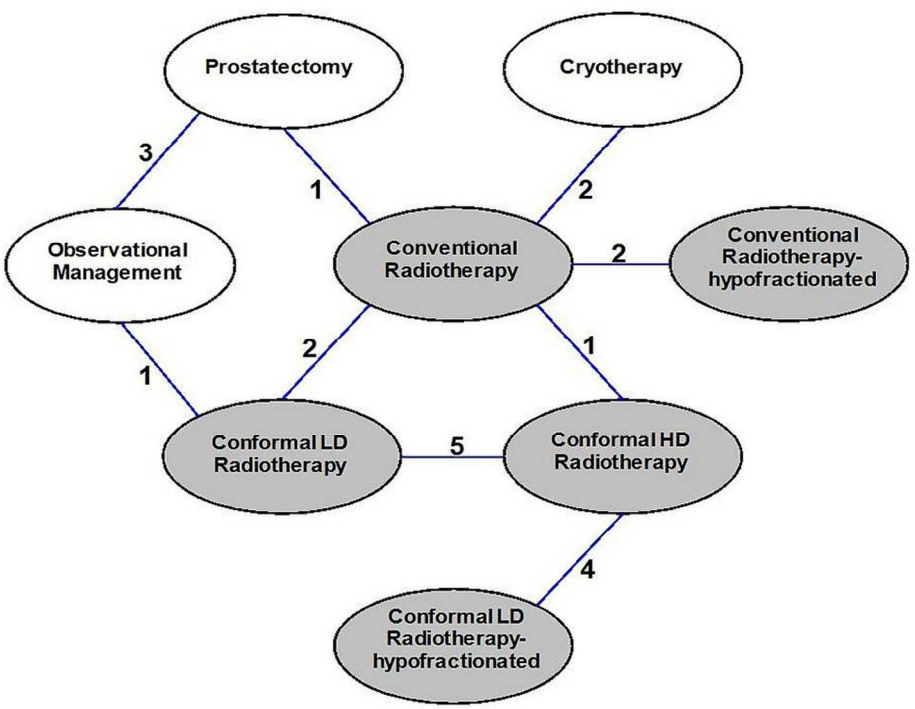

90x69mm (300 x 300 DPI)

ew only

**Appendix 1.** Full search strategy for Medline made on 12 Sep 2012

|    |                                                                                                                             |         |
|----|-----------------------------------------------------------------------------------------------------------------------------|---------|
| 1  | "watchful wait\$.ti,ab                                                                                                      | 1408    |
| 2  | (watch\$ adj2 wait\$.ti,ab                                                                                                  | 1795    |
| 3  | "observation".ti,ab                                                                                                         | 201605  |
| 4  | "watchful surveillance".ti,ab                                                                                               | 3       |
| 5  | "watchful monitoring".ti,ab                                                                                                 | 14      |
| 6  | "active surveillance".ti,ab                                                                                                 | 2609    |
| 7  | "active monitoring".ti,ab                                                                                                   | 177     |
| 8  | "expectant manag\$.ti,ab                                                                                                    | 1501    |
| 9  | "expectant monitoring".ti,ab                                                                                                | 18      |
| 10 | "expectant surveillance".ti,ab                                                                                              | 3       |
| 11 | "deferred treatment\$.ti,ab                                                                                                 | 174     |
| 12 | "deferred therap\$.ti,ab                                                                                                    | 53      |
| 13 | "delayed treatment\$.ti,ab                                                                                                  | 1752    |
| 14 | "delayed therap\$.ti,ab                                                                                                     | 264     |
| 15 | "conservative monitoring".ti,ab                                                                                             | 10      |
| 16 | 1 OR 2 OR 3 OR 4 OR 5 OR 6 OR 7 OR 8 OR 9 OR 10 OR 11 OR 12<br>OR 13 OR 14 OR 15                                            | 209461  |
| 17 | exp PROSTATIC NEOPLASMS/                                                                                                    | 83203   |
| 18 | PROSTATIC INTRAEPITHELIAL NEOPLASIA/                                                                                        | 1124    |
| 19 | pin.ti,ab                                                                                                                   | 9241    |
| 20 | ((prostat\$ adj3 (cancer\$ OR carcinoma\$ OR malignan\$ OR tumo?r\$ OR<br>neoplas\$ OR intraepithelial\$ OR adeno\$)).ti,ab | 85456   |
| 21 | 17 OR 18 OR 19 OR 20                                                                                                        | 109867  |
| 22 | RANDOMIZED CONTROLLED TRIALS AS TOPIC/                                                                                      | 82900   |
| 23 | RANDOMIZED CONTROLLED TRIAL/                                                                                                | 336590  |
| 24 | RANDOM ALLOCATION/                                                                                                          | 75700   |
| 25 | DOUBLE BLIND METHOD/                                                                                                        | 116906  |
| 26 | SINGLE BLIND METHOD/                                                                                                        | 16674   |
| 27 | CLINICAL TRIAL/                                                                                                             | 473817  |
| 28 | "clinical trial, phase i".pt                                                                                                | 12527   |
| 29 | "clinical trial, phase ii".pt                                                                                               | 20003   |
| 30 | "clinical trial, phase iii".pt                                                                                              | 7335    |
| 31 | "clinical trial, phase iv".pt                                                                                               | 739     |
| 32 | "controlled clinical trial".pt                                                                                              | 85134   |
| 33 | "randomized controlled trial".pt                                                                                            | 336590  |
| 34 | "multicenter study".pt                                                                                                      | 149366  |
| 35 | "clinical trial".pt                                                                                                         | 473817  |
| 36 | exp CLINICAL TRIALS AS TOPIC/                                                                                               | 260613  |
| 37 | 22 OR 23 OR 24 OR 25 OR 26 OR 27 OR 28 OR 29 OR 30 OR 31 OR<br>32 OR 33 OR 34 OR 35 OR 36                                   | 933873  |
| 38 | (clinical ADJ trial\$.ti,ab                                                                                                 | 185348  |
| 39 | ((singl\$ OR doubl\$ OR treb\$ OR tripl\$) AND (blind\$3 OR mask\$3)).ti,ab                                                 | 129000  |
| 40 | PLACEBOS/                                                                                                                   | 31302   |
| 41 | placebo\$.ti,ab                                                                                                             | 144213  |
| 42 | "randomly allocated".ti,ab                                                                                                  | 14778   |
| 43 | (allocated adj2 random\$.ti,ab                                                                                              | 17183   |
| 44 | 38 OR 39 OR 40 OR 41 OR 42 OR 43                                                                                            | 383691  |
| 45 | 37 OR 44                                                                                                                    | 1064978 |
| 46 | (case AND report).ti,ab                                                                                                     | 372325  |
| 47 | LETTER/                                                                                                                     | 776512  |

1  
2  
3  
4  
5  
6  
7  
8  
9  
10  
11  
12  
13  
14  
15  
16  
17  
18  
19  
20  
21  
22  
23  
24  
25  
26  
27  
28  
29  
30  
31  
32  
33  
34  
35  
36  
37  
38  
39  
40  
41  
42  
43  
44  
45  
46  
47  
48  
49  
50  
51  
52  
53  
54  
55  
56  
57  
58  
59  
60

|    |                                                           |         |
|----|-----------------------------------------------------------|---------|
| 48 | HISTORICAL ARTICLE/                                       | 286394  |
| 49 | 46 OR 47 OR 48                                            | 1422877 |
| 50 | 45 NOT 49                                                 | 1033939 |
| 51 | CRYOTHERAPY/                                              | 3337    |
| 52 | CRYOSURGERY/                                              | 10459   |
| 53 | HYPOTHERMIA, INDUCED/                                     | 15628   |
| 54 | cryoablat\$.ti,ab                                         | 1810    |
| 55 | (cryo\$ ADJ ablat\$).ti,ab                                | 351     |
| 56 | cryotreatment\$.ti,ab                                     | 65      |
| 57 | cryotherap\$.ti,ab                                        | 4776    |
| 58 | cryotherm\$.ti,ab                                         | 212     |
| 59 | (cryo\$ ADJ surgery).ti,ab                                | 149     |
| 60 | 51 OR 52 OR 53 OR 54 OR 55 OR 56 OR 57 OR 58 OR 59        | 31372   |
| 61 | ((cryo\$ OR hypotherm\$ OR freez\$) adj5 prostat\$).ti,ab | 709     |
| 62 | 60 AND 21                                                 | 916     |
| 63 | 61 OR 62                                                  | 1089    |
| 64 | PROSTATECTOMY/                                            | 19443   |
| 65 | prostatectom\$.ti,ab                                      | 18653   |
| 66 | resection.ti,ab                                           | 170070  |
| 67 | 64 OR 65 OR 66                                            | 192628  |
| 68 | (radical OR complete\$ OR total OR "en bloc").ti,ab       | 2057017 |
| 69 | 67 AND 68                                                 | 69466   |
| 70 | (LRP OR TLRP OR RALRP OR RAP OR RRP OR RPP OR EERP).ti,ab | 7847    |
| 71 | "heilbronn technique".ti,ab                               | 8       |
| 72 | 70 OR 71                                                  | 7853    |
| 73 | 69 OR 72                                                  | 76420   |
| 74 | exp RADIOTHERAPY/                                         | 125988  |
| 75 | "radiation therap\$".ti,ab                                | 46061   |
| 76 | "radiation treatment\$".ti,ab                             | 6068    |
| 77 | radiotherap\$.ti,ab                                       | 103759  |
| 78 | exp RADIOTHERAPY PLANNING/                                | 11242   |
| 79 | irradiation.ti,ab                                         | 133551  |
| 80 | RADIOTHERAPY, ADJUVANT/                                   | 15412   |
| 81 | 74 OR 75 OR 76 OR 77 OR 78 OR 79 OR 80                    | 307483  |
| 82 | META-ANALYSIS AS TOPIC/                                   | 12419   |
| 83 | "meta analy\$".ti,ab                                      | 45804   |
| 84 | metaanaly\$.ti,ab                                         | 1171    |
| 85 | META-ANALYSIS/                                            | 36142   |
| 86 | (systematic ADJ review\$1).ti,ab                          | 37644   |
| 87 | (systematic ADJ overview\$1).ti,ab                        | 489     |
| 88 | exp REVIEW LITERATURE AS TOPIC/                           | 6486    |
| 89 | 82 OR 83 OR 84 OR 85 OR 86 OR 87 OR 88                    | 93039   |
| 90 | cochrane.ab                                               | 22743   |
| 91 | embase.ab                                                 | 20328   |
| 92 | (psychlit OR psyclit).ab                                  | 865     |
| 93 | (psychinfo OR psycinfo).ab                                | 7698    |
| 94 | (cinahl OR cinhal).ab                                     | 7537    |
| 95 | "science citation index".ab                               | 1633    |
| 96 | bids.ab                                                   | 331     |
| 97 | cancerlit.ab                                              | 560     |
| 98 | 90 OR 91 OR 92 OR 93 OR 94 OR 95 OR 96 OR 97              | 37065   |
| 99 | "reference list\$.ab                                      | 7905    |

|    |     |                                                                                |
|----|-----|--------------------------------------------------------------------------------|
| 1  |     |                                                                                |
| 2  |     |                                                                                |
| 3  | 100 | bibliograph\$.ab                                                               |
| 4  | 101 | hand-search\$.ab                                                               |
| 5  | 102 | "relevant journals".ab                                                         |
| 6  | 103 | "manual search\$.ab                                                            |
| 7  | 104 | 99 OR 100 OR 101 OR 102 OR 103                                                 |
| 8  | 105 | "selection criteria".ab                                                        |
| 9  | 106 | "data extraction".ab                                                           |
| 10 | 107 | 105 OR 106                                                                     |
| 11 | 108 | REVIEW/                                                                        |
| 12 | 109 | 107 AND 108                                                                    |
| 13 | 110 | COMMENT/                                                                       |
| 14 | 111 | LETTER/                                                                        |
| 15 | 112 | EDITORIAL/                                                                     |
| 16 | 113 | ANIMAL/                                                                        |
| 17 | 114 | HUMAN/                                                                         |
| 18 | 115 | 113 NOT (113 AND 114)                                                          |
| 19 | 116 | 110 OR 111 OR 112 OR 115                                                       |
| 20 | 117 | 89 OR 98 OR 104 OR 109                                                         |
| 21 | 118 | 117 NOT 116                                                                    |
| 22 | 119 | ULTRASOUND, HIGH-INTENSITY FOCUSED, TRANSRECTAL/                               |
| 23 | 120 | ((high intensity adj2 ultraso\$)).ti,ab                                        |
| 24 | 121 | HIFU.ti,ab                                                                     |
| 25 | 122 | ((high intensity focused ultrasound)).ti,ab                                    |
| 26 | 123 | "focal therapy".ti,ab                                                          |
| 27 | 124 | 119 OR 120 OR 121 OR 122 OR 123                                                |
| 28 | 125 | 21 AND 50 AND 124                                                              |
| 29 | 126 | 16 AND 21 AND 50 AND 63 [Limit to: Publication Year 2005-Current]              |
| 30 | 127 | 16 AND 21 AND 50 AND 73 [Limit to: Publication Year 2005-Current]              |
| 31 | 128 | 16 AND 21 AND 50 AND 81 [Limit to: Publication Year 2005-Current]              |
| 32 | 129 | 50 AND 63 AND 81 [Limit to: Publication Year 2005-Current]                     |
| 33 | 130 | 50 AND 63 AND 73 [Limit to: Publication Year 2005-Current]                     |
| 34 | 131 | 21 AND 50 AND 73 AND 81 [Limit to: Publication Year 2005-Current]              |
| 35 | 132 | (21 AND 50 AND 81) NOT (128 OR 131) [Limit to: Publication Year 2005-Current]  |
| 36 | 133 | 16 AND 21 AND 63 AND 118 [Limit to: Publication Year 2005-Current]             |
| 37 | 134 | 16 AND 21 AND 73 AND 118 [Limit to: Publication Year 2005-Current]             |
| 38 | 135 | 16 AND 21 AND 81 AND 118 [Limit to: Publication Year 2005-Current]             |
| 39 | 136 | 63 AND 81 AND 118 [Limit to: Publication Year 2005-Current]                    |
| 40 | 137 | 63 AND 73 AND 118 [Limit to: Publication Year 2005-Current]                    |
| 41 | 138 | 21 AND 73 AND 81 AND 118 [Limit to: Publication Year 2005-Current]             |
| 42 | 139 | (21 AND 81 AND 118) NOT (135 OR 138) [Limit to: Publication Year 2005-Current] |
| 43 |     |                                                                                |
| 44 |     |                                                                                |
| 45 |     |                                                                                |
| 46 |     |                                                                                |
| 47 |     |                                                                                |
| 48 |     |                                                                                |
| 49 |     |                                                                                |
| 50 |     |                                                                                |
| 51 |     |                                                                                |
| 52 |     |                                                                                |
| 53 |     |                                                                                |
| 54 |     |                                                                                |
| 55 |     |                                                                                |
| 56 |     |                                                                                |
| 57 |     |                                                                                |
| 58 |     |                                                                                |
| 59 |     |                                                                                |
| 60 |     |                                                                                |

Appendix 2. Characteristics of included studies

| Comparison                                                     | Trial title                                                       | Author, year                                                        | Country                    | Population                                                                                                                                                               | No. of men | Interventions and Comparisons                                                                                                                        | Outcomes                                                                                                                                                                          | Follow up         |
|----------------------------------------------------------------|-------------------------------------------------------------------|---------------------------------------------------------------------|----------------------------|--------------------------------------------------------------------------------------------------------------------------------------------------------------------------|------------|------------------------------------------------------------------------------------------------------------------------------------------------------|-----------------------------------------------------------------------------------------------------------------------------------------------------------------------------------|-------------------|
| Observational management v Prostatectomy (3 trials)            | Graverson 1990 (1 paper)                                          | Graverson 1990                                                      | USA                        | Dates of enrolment to study: Between May 1967 and March 1975; Setting: Multi-centre (15 participating hospitals); Age: All age; Disease status: stage I or II (T0 – T2). | 142        | 1. Watchful waiting (74 men)<br>2. Prostatectomy (68 men)                                                                                            | Overall survival.                                                                                                                                                                 | 15 years.         |
|                                                                | PIVOT trial (1 paper)                                             | Wilt 2012                                                           | USA                        | Dates of enrolment to study: Nov 1994 to Jan 2002; Setting: multicentre; Mean age: 67yr; Disease status: T1-T2NxM0.                                                      | 731        | 1. Observation (367 men)<br>2. Prostatectomy (364 men)                                                                                               | All cause mortality; Cancer caused mortality; Bone metastases; Urinary incontinence; Bowel dysfunction; Erectile dysfunction.                                                     | 10 years.         |
|                                                                | Scandinavian Prostate Cancer Group Study No 4 (SPCG-4) (6 papers) | Bill-Axelsson 2005, 2008, 2011; Johansson 2009, 2011 Steineck 2002; | Sweden, Finland, Iceland   | Dates of enrolment to study: Oct 1989 to Feb 1999; Setting: Multi-centre (14 participating hospitals); Age: Mean age 64.7; Disease status: T0d, T1, T2.                  | 695        | 1. Watchful waiting (348 men)<br>2. Prostatectomy (347 men)                                                                                          | Death due to prostate cancer; All-caused mortality; Distance metastasis; Local progression; overall distress from all bowel symptoms, overall distress from all urinary symptoms. | 8.2 - 12.8 years. |
| Observational management v Conformal LD radiotherapy (1 trial) | Widmark 2011 (1 paper)                                            | Widmark 2011                                                        | Sweden, Denmark and Norway | Dates of enrolment to study: Apr 1986 to Jan 1997; Setting: unknown; Age: up to 75; Disease status: T1b-T2, pN0, G1-G2, M0.                                              | 214        | 1. Watchful waiting (107 men)<br>2. 3D conformal radiotherapy, either 64 Gy in 32 fractions with 2cm margin, or 64-68 Gy with 1.5cm margin (107 men) | All-cause mortality, Prostate cancer mortality, Distant progression, Recurrence free survival, Clinical progression, Biochemical progression, Local progression.                  | 20 years.         |

|                                                                                                       |                                                      |                         |                                    |        |                                                                                                                                                                                                                           |     |                                                                                                                                                                                                                                                                                                                                  |                                                                                                                                                                                                                     |                                  |
|-------------------------------------------------------------------------------------------------------|------------------------------------------------------|-------------------------|------------------------------------|--------|---------------------------------------------------------------------------------------------------------------------------------------------------------------------------------------------------------------------------|-----|----------------------------------------------------------------------------------------------------------------------------------------------------------------------------------------------------------------------------------------------------------------------------------------------------------------------------------|---------------------------------------------------------------------------------------------------------------------------------------------------------------------------------------------------------------------|----------------------------------|
| 1<br>2<br>3<br>4<br>5<br>6<br>7<br>8<br>9<br>10<br>11<br>12<br>13<br>14<br>15<br>16<br>17<br>18<br>19 | Prostatectomy v Conventional radiotherapy (2 trials) | Akakura 2006(1 paper)   | Akakura 2006                       | Japan  | Dates of enrolment to study: 1989 to 1993; Setting: Multi-centre; Age: Mean 68.1, SD 7.0 in surgery group; mean 68.7, SD 6.6 in radiation group; Disease status: T2b-3N0M0, no evidence of lymph node metastasis.         | 95  | 1. Prostatectomy (46 men).2. Conventional radiotherapy (49 men): Irradiation by linear accelerator with a 40-50 Gy beam to the whole pelvis followed by a 20 Gy boost to the prostatic area for 6-7 weeks fractionated five times per week. All men received an initial treatment with 8 weeks of neoadjuvant endocrine therapy. | Biochemical progression-free survival at 10 years; Clinical progression-free survival at 10 years; Cause-specific survival at 10 years; Overall survival at 10 years; Adverse effects.                              | Median follow-up was 102 months. |
| 20<br>21<br>22<br>23<br>24<br>25<br>26<br>27                                                          | Cryotherapy v Conventional radiotherapy (2 trials)   | Canada trial (3 papers) | Donnelly 2007, 2010; Robinson 2009 | Canada | Dates of enrolment to study: Dec 1997 to Feb 2003; Setting: Tom Baker Cancer Center, Calgary, Canada; Age: Median 69.4, range 52.8-81.4 in CT group; median 68.6, range 53.2-78.6 in EBRT group; Disease status: T2 - T3. | 244 | 1. Cryotherapy (122 men). 2. Conventional EBRT (122 men): dose of 68 Gy given in 2 Gy fractions daily, 5 days per week, later increased to 70 Gy and later 73.5 Gy.                                                                                                                                                              | Treatment Failure; 5 year overall survival; Biopsy rate at 36 months; Disease-specific survival at 5 years; Genitourinary and gastrointestinal adverse effects; Quality of life.                                    | Median follow-up was 82 months.  |
| 28<br>29<br>30<br>31<br>32<br>33<br>34<br>35<br>36                                                    |                                                      | Chin 2008 (1 paper)     | Chin 2008                          | Canada | Setting: London Health Sciences Centre, University of Western Ontario; Age: Median age 70 in each group; Disease status: T2 - T3.                                                                                         | 64  | 1. Cryotherapy (33 men). 2. Conventional EBRT (31 men): 66 Gy in 33 fractions.                                                                                                                                                                                                                                                   | Biochemical disease-free survival at 4 years; Overall survival at 4 years; Disease specific survival at 4 years; Positive biopsy rate; Gastrointestinal toxicity; Genitourinary toxicity; Hormonal adverse effects. | Mean follow-up 37 months.        |



|                                                                                                    |                                                                                   |                                                                 |                             |             |                                                                                                                                                                                                                                           |     |                                                                                                                                                                                                                                    |                                                                                                                                                                                                                       |                                 |
|----------------------------------------------------------------------------------------------------|-----------------------------------------------------------------------------------|-----------------------------------------------------------------|-----------------------------|-------------|-------------------------------------------------------------------------------------------------------------------------------------------------------------------------------------------------------------------------------------------|-----|------------------------------------------------------------------------------------------------------------------------------------------------------------------------------------------------------------------------------------|-----------------------------------------------------------------------------------------------------------------------------------------------------------------------------------------------------------------------|---------------------------------|
| 1<br>2<br>3<br>4<br>5<br>6<br>7<br>8<br>9<br>10<br>11<br>12<br>13<br>14                            | Conventional radiotherapy v Conventional radiotherapy-hypofractionated (2 trials) | Yeoh trial (4 papers)                                           | Yeoh 2003, 2006, 2009, 2011 | Australia   | Dates of enrolment to study: July 1996 to Aug 2003; Setting: Department of Radiation Oncology and Gastroenterology, Royal Adelaide Hospital; Age: Median age 69 (44 ~ 82 yrs); Disease status: T1, T2, N0 M0.                             | 217 | 1. Conventional EBRT: 64 Gy in 32 fractions within 6.5 weeks (109 men).<br>2. Hypofractionated EBRT: 55 Gy in 20 fractions within 4 weeks (108 men).                                                                               | Gastrointestinal (GI) and genitourinary (GU) toxicity; overall survival rate; biochemical $\pm$ clinical relapse; biochemical $\pm$ clinical relapse-free survival; cancer-related mortality.                         | 5 years.                        |
| 15<br>16<br>17<br>18<br>19<br>20<br>21<br>22<br>23                                                 |                                                                                   | Lukka 2005 (1 paper)                                            | Lukka 2005                  | Canada      | Dates of enrolment to study: March 1995 – December 1998; Setting: 8 Ontario regional cancer centres and 8 additional Canadian centres; Age: Mean 70.3, range 53-84 in group 1; mean 70.0, range 53-84 in group 2; Disease status: T1, T2. | 936 | 1. Conventional EBRT (470 men): 66 Gy in 33 fractions over 45 days.<br>2. Hypofractionated EBRT (466 men): 52.5 Gy in 20 fractions over 28 days.                                                                                   | Composite of biochemical or clinical failure (BCF); local persistence of tumour on biopsy of the prostate at 2 years; overall survival; acute and late radiation-induced toxicity; prostate cancer-related mortality. | Median follow-up was 5.7 years. |
| 24<br>25<br>26<br>27<br>28<br>29<br>30<br>31<br>32                                                 | Conventional radiotherapy v Conformal LD radiotherapy (2 trials)                  | Koper trial (2 papers)                                          | Koper 1999, 2004            | Netherlands | Dates of enrolment to study: June 1994 to March 1996; Setting: Erasmus Medical Center/Daniel den Hoed Cancer Center; Mean age: group1: 70 (6.4); group 2: 69.5 (6.1); Disease status: T1-T4 NOM0.                                         | 266 | 1. Conventional radiotherapy (134 men);<br>2. Conformal radiotherapy (129 men). All men were treated to a dose of 66 Gy, using the same planning procedure, treatment technique, linear accelerator, and portal imaging procedure. | Gastrointestinal (GI) and genitourinary (GU) toxicity.                                                                                                                                                                | 2 years.                        |
| 33<br>34<br>35<br>36<br>37<br>38<br>39<br>40<br>41<br>42<br>43<br>44<br>45<br>46<br>47<br>48<br>49 |                                                                                   | Royal Marsden and Institute of Cancer Research study (2 papers) | Dearnaley 1999; Tait 1997   | UK          | Dates of enrolment to study: 1988 to 1995; Setting: Tertiary care, single centre; Median age (range): 69 (51-80) in group 1, 68 (50-83) in group 2; Disease status: T1-T4 NOM0.                                                           | 225 | 1. Conventional radiotherapy (111 men): 60 to 64 Gy in 2 Gy fractions.<br>2. Conformal radiotherapy (114 men): 60 to 64 Gy in 2 Gy fractions.                                                                                      | Overall survival; Biochemical progression free survival; Late GI toxicity; Late GU toxicity.                                                                                                                          | 2 - 5 years.                    |

|                                                                |                                                                  |                                   |                                                                                     |             |                                                                                                                                                                                            |     |                                                                                                                                                          |                                                                                                                                                                                                                                                                                                   |                  |
|----------------------------------------------------------------|------------------------------------------------------------------|-----------------------------------|-------------------------------------------------------------------------------------|-------------|--------------------------------------------------------------------------------------------------------------------------------------------------------------------------------------------|-----|----------------------------------------------------------------------------------------------------------------------------------------------------------|---------------------------------------------------------------------------------------------------------------------------------------------------------------------------------------------------------------------------------------------------------------------------------------------------|------------------|
| 1<br>2<br>3<br>4<br>5<br>6<br>7<br>8<br>9<br>10<br>11          | Conformal LD radiotherapy v Conformal HD radiotherapy (5 trials) | Dutch trial (7 papers)            | Al-Mamgani 2008, 2011; Heemsbergen 2007; Peeters 2005, 2006a,b; van der Wielen 2008 | Netherlands | Dates of enrolment to study: between June 1997 and February 2003; Setting: multi-center; Age: mean 68.6 and 68.8, range 50.3-82.9 and 48.7-83.6; Disease status: T1-T4.                    | 669 | 1. 3D conformal radiotherapy 68 Gy (331 men).<br>2. 3D conformal radiotherapy 78 Gy (333 men).                                                           | freedom from failure; biochemical progression free survival; clinical progression free survival; overall survival; late GI toxicity; late GU toxicity; prostate cancer related deaths.                                                                                                            | 2 - 7 years.     |
| 12<br>13<br>14<br>15<br>16<br>17<br>18                         | MRC RT01 pilot trial (1 paper)                                   | Dearnaley 2005                    |                                                                                     | UK          | Dates of enrolment to study: between Jul 1995 and Dec 1997; Setting: Royal Marsden NHS Trust and Institute of Cancer Research; Age: median 66 and 69; Disease status: T1b-T3b N0 M0.       | 127 | 1. Conformal radiotherapy, standard dose (64 men): 64 Gy in 2 Gy fractions.<br>2. Conformal radiotherapy, high dose (63 men): 74 Gy in 2 Gy fractions.   | Biochemical (PSA) failure; Local or metastatic failure; Hormone therapy restarted; acute GU toxicity; acute GI toxicity; late GU toxicity; late GI toxicity; prostate cancer caused deaths.                                                                                                       | 5 years.         |
| 19<br>20<br>21<br>22<br>23<br>24<br>25<br>26<br>27<br>28<br>29 | MRC RT01 (3 papers)                                              | Dearnaley 2007a,b; Syndikus 2010. |                                                                                     | UK          | Dates of enrolment to study: Jan 1998 to Dec 2002; Setting: multi-centre; Age: median 67 (IQR 63-71); Disease status: T1b-T3a N0 M0.                                                       | 843 | 1. Conformal radiotherapy, standard dose (421 men): 64 Gy in 2 Gy fractions.<br>2. Conformal radiotherapy, high dose (422 men): 74 Gy in 2 Gy fractions. | Biochemical-progression-free survival; 5-year overall survival; Progression-free survival; Freedom from local progression; Freedom from salvage androgen suppression; Metastases-free survival; Bowel dysfunction; Urinary or bladder dysfunction; Sexual dysfunction; prostate cancer mortality. | 5 years.         |
| 30<br>31<br>32<br>33<br>34<br>35                               | GETUG 06 Trial (2 papers)                                        | Beckendorf 2004, 2011             |                                                                                     | France      | Dates of enrolment to study: Sep 1999 to Feb 2002; Setting: Multicentre; Age: mean 67; Disease status: T1b-T3a, NOM0.                                                                      | 306 | 1. Conformal radiotherapy, standard dose (153 men): 70 Gy in 2 Gy fractions.<br>2. Conformal radiotherapy, high dose (153 men): 80 Gy in 2 Gy fractions. | Biochemical relapse alone; PSA and clinical relapse; Free from relapse; All cause death; Cancer cause death; RTOG rectal and urinary toxicity grade 2 and worse.                                                                                                                                  | 61 months.       |
| 36<br>37<br>38<br>39<br>40<br>41<br>42<br>43<br>44<br>45       | Zietman trial (2 papers)                                         | Zietman AL, 2005, 2010            |                                                                                     | USA         | Dates of enrolment to study: between Jan 1996 and Dec 1999; Setting: 2 US academic institutions; Age: 67 (45~91) in 70.2 Gy arm, 66 (47~78) in 79.2 Gy arm; Disease status: T1-T2, N0, Nx. | 393 | 1. External beam radiation 70.2 Gy (197 men);<br>2. External beam radiation 79.2 Gy (195 men).                                                           | Freedom from biochemical failure 5 yrs after treatment (measured by PSA level); Acute and late GU and GI morbidity, overall survival, prostate cancer-related mortality.                                                                                                                          | 5.5 - 8.9 years. |

|                                                                                   |                                                            |                                              |           |                                                                                                                                                                |     |                                                                                                                                                                                                                                                    |                                                                                                                                                                                                    |                                  |
|-----------------------------------------------------------------------------------|------------------------------------------------------------|----------------------------------------------|-----------|----------------------------------------------------------------------------------------------------------------------------------------------------------------|-----|----------------------------------------------------------------------------------------------------------------------------------------------------------------------------------------------------------------------------------------------------|----------------------------------------------------------------------------------------------------------------------------------------------------------------------------------------------------|----------------------------------|
| Conformal HD radiotherapy v Conformal LD radiotherapy-hypofractionated (4 trials) | Arcangeli 2010 (2 papers)                                  | Arcangeli 2010, 2011                         | Italy     | Dates of enrolment to study: Jan 2003 to Dec 2007; Setting: single centre; Mean age: 75 years; Disease status: no evidence of distant metastases.              | 168 | 1. hypofractionated (62 Gy/20 fractions/5 weeks, 4 fractions per week): 83 men.<br>2. conventional fractionation radiotherapy (80 Gy/40 fractions/8 weeks): 85 men.                                                                                | Acute and late GU and GI toxicity; biochemical failure; freedom from biochemical failure; distant metastasis rates; all cause mortality; cancer related mortality.                                 | 4 years.                         |
|                                                                                   | Marzi 2009 (1 paper)                                       | Marzi 2009                                   | Italy     | Dates of enrolment to study: March 2003 to June 2008; Setting: single centre; Age: all; Disease status: T1-T4.                                                 | 162 | 1. Conformal radiotherapy hypofractionated: 62 Gy in 20 fractions over 5 weeks (57 men);<br>2. Conformal radiotherapy: 80 Gy in 40 fractions over 8 weeks (57 men).                                                                                | Late rectal toxicity.                                                                                                                                                                              | Median followup was 30 months.   |
|                                                                                   | Norkus 2009 (2 papers)                                     | Norkus 2009 a,b                              | Lithuania | Dates of enrolment to study: 2004; Setting: single centre; Age: median 63 (range 53-75) in group 1, median 65 (range 50-78) in group 2; Disease status: T1-T3. | 91  | 1. Hypofractionated external beam radiotherapy: 57 Gy given as 13 fractions of 3 Gy plus 4 fractions of 4.5 Gy (47 men).<br>2. Conventionally fractionated external beam radiotherapy: 74 Gy given in 37 fractions of 2 Gy (44 men).               | Biochemical (PSA) response; acute gastrointestinal (GI) and genitourinary (GU) toxicity; overall survival; prostate cancer-related mortality.                                                      | 3 - 12 months.                   |
|                                                                                   | CHHiP trial (1 paper)                                      | Dearnaley 2012                               | UK        | Dates of enrolment to study: Oct 2002 to Aug 2006; Setting: multicentre; Age: median 67 - 68 (range 44-82); Disease status: T1b - T3a NOMO.                    | 457 | 1. Conventional fractionation: 74 Gy in 37 fractions at 2 Gy per fraction (153 men).<br>2. Hypofractionation: 60 Gy in 20 fractions at 3 Gy per fraction (153 men).<br>3. Hypofractionation: 57 Gy in 19 fractions at 3 Gy per fraction (151 men). | Acute bowel toxicity; Acute bladder toxicity; Late bowel toxicity; Late bladder toxicity; Sexual dysfunction.                                                                                      | 50.5 months.                     |
| Conventional radiotherapy v Conformal HD radiotherapy (1 trial)                   | M. D. Anderson randomized dose-escalation trial (4 papers) | Kuban 2008, 2011; Pollack 2002; Storey 2000. | USA       | Dates of enrolment to study: 1993 to 1998; Setting: M. D. Anderson Cancer Center, University of Texas; Median age 69 for each arm; Disease status: T1-T3 NOMO. | 305 | 1. Conventional radiotherapy (150 men): 70 Gy, given in daily 2 Gy fractions.<br>2. 3D conformal radiotherapy (151 men): 78 Gy, given in daily 2 Gy fractions.                                                                                     | freedom from biochemical or clinical failure; freedom from distant metastasis; overall survival; disease-specific survival; late GI toxicity; late GU toxicity; prostate cancer-related mortality. | Median follow-up of 5 - 8 years. |

LD: low dose; HD: high dose.

**Appendix 3.** Assessment of risk of bias for included randomized trials (please refer to [www.cochrane-handbook.org](http://www.cochrane-handbook.org) for instructions on how to complete the tables).

**Outcomes measured:**

a - all cause mortality.

b - cancer related mortality.

c - gastrointestinal and genitourinary toxicity.

**Study ID: CHHiP trial**

| Risk of bias table for outcome c       |                                   |                                                                                                                                           |
|----------------------------------------|-----------------------------------|-------------------------------------------------------------------------------------------------------------------------------------------|
|                                        | Judgement (low/high/unclear risk) | Support for judgement                                                                                                                     |
| Random sequence generation             | Low risk                          | Computer-generated random permuted blocks were used                                                                                       |
| Allocation concealment                 | Low risk                          | Independent randomisation was via telephone to the ICR-CTSU.                                                                              |
| Blinding of participants and personnel | High risk                         | Treatment allocation was not masked and, because of the trial's size, assessors could not be blinded to toxicity or clinical assessments. |
| Blinding of outcome assessment         | High risk                         | Treatment allocation was not masked and, because of the trial's size, assessors could not be blinded to toxicity or clinical assessments. |
| Incomplete outcome data                | Low risk                          | Losses to follow-up are disclosed                                                                                                         |
| Selective reporting                    | Low risk                          | Pre-planned analyses.                                                                                                                     |
| Other bias                             | Low risk                          | No other sources of bias identified.                                                                                                      |

**Study ID: PIVOT trial**

| Risk of bias table for outcomes a, b   |                                   |                                                                                                                      |
|----------------------------------------|-----------------------------------|----------------------------------------------------------------------------------------------------------------------|
|                                        | Judgement (low/high/unclear risk) | Support for judgement                                                                                                |
| Random sequence generation             | Low risk                          | Randomization was stratified according to site and implemented by means of a central interactive telephone system    |
| Allocation concealment                 | Low risk                          | Protocol                                                                                                             |
| Blinding of participants and personnel | Low risk                          | Unmasked design, but we judge that lack of blinding is unlikely to affect mortality or biochemical/clinical relapse. |
| Blinding of outcome                    | Low risk                          | After randomization, a central pathologist reviewed the biopsy and radical-prostatectomy specimens, and a            |

|                                         |                                              |                                                                                                                   |
|-----------------------------------------|----------------------------------------------|-------------------------------------------------------------------------------------------------------------------|
| assessment                              |                                              | central laboratory measured PSA.                                                                                  |
| Incomplete outcome data                 | Low risk                                     | Losses to follow-up described and were low                                                                        |
| Selective reporting                     | Low risk                                     | Protocol                                                                                                          |
| Other bias                              | Low risk                                     | Not identified                                                                                                    |
| <b>Risk of bias table for outcome c</b> |                                              |                                                                                                                   |
|                                         | <b>Judgement</b> (low/<br>high/unclear risk) | <b>Support for judgement</b>                                                                                      |
| Random sequence generation              | Low risk                                     | Randomization was stratified according to site and implemented by means of a central interactive telephone system |
| Allocation concealment                  | Low risk                                     | Protocol                                                                                                          |
| Blinding of participants and personnel  | HIGH risk                                    | Lack of blinding is likely to pose conceptual risks to the toxicity assessment.                                   |
| Blinding of outcome assessment          | High risk                                    | Toxicity outcomes are patient-reported and therefore at high risk of bias.                                        |
| Incomplete outcome data                 | High risk                                    | Moderate losses to follow-up, 23% in each group.                                                                  |
| Selective reporting                     | Low risk                                     | Protocol                                                                                                          |
| Other bias                              | Low risk                                     | Not identified                                                                                                    |

**Study ID: GETUG 06 Tial**

|                                             |                                              |                                                                                                                      |
|---------------------------------------------|----------------------------------------------|----------------------------------------------------------------------------------------------------------------------|
| <b>Risk of bias table for outcomes a, b</b> |                                              |                                                                                                                      |
|                                             | <b>Judgement</b> (low/<br>high/unclear risk) | <b>Support for judgement</b>                                                                                         |
| Random sequence generation                  | Unclear risk                                 | Not stated                                                                                                           |
| Allocation concealment                      | Unclear risk                                 | Not stated                                                                                                           |
| Blinding of participants and personnel      | Low risk                                     | Unmasked design, but we judge that lack of blinding is unlikely to affect mortality or biochemical/clinical relapse. |
| Blinding of outcome assessment              | Low risk                                     | Unmasked design, but we judge that lack of blinding is unlikely to affect mortality or biochemical/clinical relapse. |
| Incomplete outcome data                     | Low risk                                     | Lost to follow-up described                                                                                          |
| Selective reporting                         | Unclear risk                                 | No protocol available                                                                                                |
| Other bias                                  | Low risk                                     | Not identified                                                                                                       |

1  
2  
3  
4  
5  
6  
7  
8  
9  
10  
11  
12  
13  
14  
15  
16  
17  
18  
19  
20  
21  
22  
23  
24  
25

| <b>Risk of bias table for outcome c</b> |                                              |                                                                                 |
|-----------------------------------------|----------------------------------------------|---------------------------------------------------------------------------------|
|                                         | <b>Judgement</b> (low/<br>high/unclear risk) | <b>Support for judgement</b>                                                    |
| Random sequence generation              | Unclear risk                                 | Not stated                                                                      |
| Allocation concealment                  | Unclear risk                                 | Not stated                                                                      |
| Blinding of participants and personnel  | HIGH risk                                    | Lack of blinding is likely to pose conceptual risks to the toxicity assessment. |
| Blinding of outcome assessment          | HIGH risk                                    | Lack of blinding is likely to pose conceptual risks to the toxicity assessment. |
| Incomplete outcome data                 | Low risk                                     | Lost to follow-up described                                                     |
| Selective reporting                     | Unclear risk                                 | No protocol available                                                           |
| Other bias                              | Low risk                                     | Not identified                                                                  |

26  
27  
28  
29  
30  
31  
32  
33  
34  
35  
36  
37  
38  
39  
40  
41  
42  
43  
44  
45  
46  
47  
48  
49  
50

**Study ID: Widmark 2011**

| <b>Risk of bias table for outcomes a, b</b> |                                              |                                                                                                                      |
|---------------------------------------------|----------------------------------------------|----------------------------------------------------------------------------------------------------------------------|
|                                             | <b>Judgement</b> (low/<br>high/unclear risk) | <b>Support for judgement</b>                                                                                         |
| Random sequence generation                  | Unclear                                      | No details available.                                                                                                |
| Allocation concealment                      | Unclear                                      | No details available.                                                                                                |
| Blinding of participants and personnel      | Low risk                                     | Unmasked design, but we judge that lack of blinding is unlikely to affect mortality or biochemical/clinical relapse. |
| Blinding of outcome assessment              | Low risk                                     | Unmasked design, but we judge that lack of blinding is unlikely to affect mortality or biochemical/clinical relapse. |
| Incomplete outcome data                     | Unclear                                      | No details available.                                                                                                |
| Selective reporting                         | Unclear                                      | No details available.                                                                                                |
| Other bias                                  | Unclear                                      | No details available.                                                                                                |

51  
52  
53  
54  
55  
56  
57  
58  
59  
60

**Study ID: Yeoh trial**

| <b>Risk of bias table for outcomes a, b</b> |                                              |                              |
|---------------------------------------------|----------------------------------------------|------------------------------|
|                                             | <b>Judgement</b> (low/<br>high/unclear risk) | <b>Support for judgement</b> |

|                                        |              |                                                                         |
|----------------------------------------|--------------|-------------------------------------------------------------------------|
| Random sequence generation             | Low risk     | Blocked computer-generated random numbers (Yeoh EE 2003)                |
| Allocation concealment                 | Unclear risk | Not clear                                                               |
| Blinding of participants and personnel | Low risk     | Unlikely to pose any conceptual risks to the ascertainment of mortality |
| Blinding of outcome assessment         | Low risk     | Unlikely to pose any conceptual risks to the ascertainment of mortality |
| Incomplete outcome data                | Low risk     | Report Kaplan Meier estimates, log-rank test results.                   |
| Selective reporting                    | Low risk     | Pre-specified                                                           |
| Other bias                             | Low risk     | Not identified                                                          |

**Study ID: Royal Marsden trial**

**Risk of bias table for outcome a**

|                                        | <b>Judgement</b> (low/high/unclear risk) | <b>Support for judgement</b>                                                                                                                                    |
|----------------------------------------|------------------------------------------|-----------------------------------------------------------------------------------------------------------------------------------------------------------------|
| Random sequence generation             | Low risk                                 | "Randomised permuted blocks design from an independent randomisation service offered by the Clinical trials and Statistics Unit, institute of Cancer Research". |
| Allocation concealment                 | Low risk                                 | Allocation carried out by independent randomisation service.                                                                                                    |
| Blinding of participants and personnel | Low risk                                 | Unmasked design, but we judge that lack of blinding is unlikely to pose any conceptual risks to the ascertainment of mortality.                                 |
| Blinding of outcome assessment         | Low risk                                 | Unmasked design, but we judge that lack of blinding is unlikely to pose any conceptual risks to the ascertainment of mortality.                                 |
| Incomplete outcome data                | Low risk                                 | Losses of follow-up disclosed, losses were low and balanced between intervention groups.                                                                        |
| Selective reporting                    | Unclear risk                             | Not clear which outcomes were pre-specified.                                                                                                                    |
| Other bias                             | Low risk                                 | No other sources of bias identified.                                                                                                                            |

**Risk of bias table for outcome c**

|                            | <b>Judgement</b> (low/high/unclear risk) | <b>Support for judgement</b>                                                                                                                                    |
|----------------------------|------------------------------------------|-----------------------------------------------------------------------------------------------------------------------------------------------------------------|
| Random sequence generation | Low risk                                 | "Randomised permuted blocks design from an independent randomisation service offered by the Clinical trials and Statistics Unit, institute of Cancer Research". |

|                                        |           |                                                                                          |
|----------------------------------------|-----------|------------------------------------------------------------------------------------------|
| Allocation concealment                 | Low risk  | Allocation carried out by independent randomisation service.                             |
| Blinding of participants and personnel | High risk | Lack of blinding is likely to pose conceptual risks to the toxicity assessment.          |
| Blinding of outcome assessment         | High risk | Lack of blinding is likely to pose conceptual risks to the toxicity assessment.          |
| Incomplete outcome data                | Low risk  | Losses of follow-up disclosed, losses were low and balanced between intervention groups. |
| Selective reporting                    | High risk | Some cut-off values reporting.                                                           |
| Other bias                             | Low risk  | No other sources of bias identified.                                                     |

**Study ID: Zietman trial**

| <b>Risk of bias table for outcomes a, b</b> |                                              |                                                                                                                                                                                                            |
|---------------------------------------------|----------------------------------------------|------------------------------------------------------------------------------------------------------------------------------------------------------------------------------------------------------------|
|                                             | <b>Judgement</b> (low/<br>high/unclear risk) | <b>Support for judgement</b>                                                                                                                                                                               |
| Random sequence generation                  | Low risk                                     | Central randomization                                                                                                                                                                                      |
| Allocation concealment                      | Low risk                                     | Randomized by external body: randomized centrally by the American College of Radiology statistical office on protocol 95-09 of the Proton Radiation Oncology Group between January 1996 and December 1999. |
| Blinding of participants and personnel      | Low risk                                     | Unlikely to pose any conceptual risks to the ascertainment of mortality and biochemical outcomes                                                                                                           |
| Blinding of outcome assessment              | Low risk                                     | Unlikely to pose any conceptual risks to the ascertainment of mortality and biochemical outcomes                                                                                                           |
| Incomplete outcome data                     | Low risk                                     | Follow-up data completed                                                                                                                                                                                   |
| Selective reporting                         | unclear                                      | No clear                                                                                                                                                                                                   |
| Other bias                                  | Low                                          | Not identified                                                                                                                                                                                             |
| <b>Risk of bias table for outcome c</b>     |                                              |                                                                                                                                                                                                            |
|                                             | <b>Judgement</b> (low/<br>high/unclear risk) | <b>Support for judgement</b>                                                                                                                                                                               |
| Random sequence generation                  | Low risk                                     | Central randomization                                                                                                                                                                                      |
| Allocation concealment                      | Low risk                                     | Randomized by external body: randomized centrally by the American College of Radiology statistical office on protocol 95-09 of the Proton Radiation Oncology Group between January 1996 and December 1999. |
| Blinding of participants and                | High risk                                    | Lack of blinding is likely to poses conceptual risks to                                                                                                                                                    |



|                                |           |                                                                             |
|--------------------------------|-----------|-----------------------------------------------------------------------------|
| personnel                      |           | toxicity assessment                                                         |
| Blinding of outcome assessment | High risk | Lack of blinding is likely to poses conceptual risks to toxicity assessment |
| Incomplete outcome data        | Low risk  | Follow-up data completed                                                    |
| Selective reporting            | Unclear   | No clear                                                                    |
| Other bias                     | Low       | Not identified                                                              |

**Study ID: SPCG-4**

| <b>Risk of bias table for outcomes a, b</b> |                                          |                                                                                                                                                                                                                                                                                   |
|---------------------------------------------|------------------------------------------|-----------------------------------------------------------------------------------------------------------------------------------------------------------------------------------------------------------------------------------------------------------------------------------|
|                                             | <b>Judgement</b> (low/high/unclear risk) | <b>Support for judgement</b>                                                                                                                                                                                                                                                      |
| Random sequence generation                  | Low                                      | Stratification according to tumor grade and randomization center. The randomization list was computer generated, and the block size was unknown to the investigators                                                                                                              |
| Allocation concealment                      | Unclear                                  | Not stated                                                                                                                                                                                                                                                                        |
| Blinding of participants and personnel      | Low                                      | Unmasked design, but we judge that lack of blinding is unlikely to pose any conceptual risks to the ascertainment of mortality.                                                                                                                                                   |
| Blinding of outcome assessment              | Low                                      | "Blinding to analyst". The pathologists were blinded to patient outcome and assignment. Only the results from the central review are used. Members of the endpoint committee were blinded to patients' group assignment and treatment received." Or, "Blinded evaluation (2005)". |
| Incomplete outcome data                     | Low                                      | Losses of follow-up disclose                                                                                                                                                                                                                                                      |
| Selective reporting                         | Low                                      | Outcomes pre-specified                                                                                                                                                                                                                                                            |
| Other bias                                  | Low                                      | Not other sources of bias identified.                                                                                                                                                                                                                                             |
| <b>Risk of bias table for outcome c</b>     |                                          |                                                                                                                                                                                                                                                                                   |
|                                             | <b>Judgement</b> (low/high/unclear risk) | <b>Support for judgement</b>                                                                                                                                                                                                                                                      |
| Random sequence generation                  | Low risk                                 | The randomization list was computer generated (Bill-Axelsson,2002)                                                                                                                                                                                                                |
| Allocation concealment                      | Unclear risk                             | Not stated                                                                                                                                                                                                                                                                        |
| Blinding of participants and personnel      | High risk                                | Unmasked design, and lack of blinding could influence reporting of adverse effects                                                                                                                                                                                                |
| Blinding of outcome assessment              | High risk                                | Outcome assessment was obtained by asking patients to return questionnaire after intervention, from which the blinding of assessor is impossible.                                                                                                                                 |

|                         |              |                                                                                                          |
|-------------------------|--------------|----------------------------------------------------------------------------------------------------------|
| Incomplete outcome data | Low risk     | 88% and 87% of participants return questionnaires from prostatectomy and watchful waiting, respectively. |
| Selective reporting     | Unclear risk | Study report doesn't make clear if this outcome were pre-specified.                                      |
| Other bias              | Low risk     | No other sources of bias identified.                                                                     |

**Study ID: Graversen1990**

| <b>Risk of bias table for outcome a</b> |                                          |                                                                                                                                   |
|-----------------------------------------|------------------------------------------|-----------------------------------------------------------------------------------------------------------------------------------|
|                                         | <b>Judgement</b> (low/high/unclear risk) | <b>Support for judgement</b>                                                                                                      |
| Random sequence generation              | Unclear risk                             | More elderly patients in placebo group                                                                                            |
| Allocation concealment                  | Unclear risk                             | Not stated                                                                                                                        |
| Blinding of participants and personnel  | Low risk                                 | Unmasked design, but we judge that lack of blinding is unlikely to pose any conceptual risks to the ascertainment of mortality.   |
| Blinding of outcome assessment          | Low risk                                 | Unmasked design, but we judge that lack of blinding is unlikely to pose any conceptual risks to the ascertainment of mortality.   |
| Incomplete outcome data                 | High risk                                | Outcome data incomplete.                                                                                                          |
| Selective reporting                     | Unclear risk                             | Not stated                                                                                                                        |
| Other bias                              | High risk                                | 31 stage I and 20 stage II patients were assigned to placebo; 31 stage I and 30 stage II patients were assigned to prostatectomy. |

**Study ID: Canada trial**

| <b>Risk of bias table for outcomes a, b</b> |                                          |                                                                                                                                                        |
|---------------------------------------------|------------------------------------------|--------------------------------------------------------------------------------------------------------------------------------------------------------|
|                                             | <b>Judgement</b> (low/high/unclear risk) | <b>Support for judgement</b>                                                                                                                           |
| Random sequence generation                  | Unclear risk                             | No information given                                                                                                                                   |
| Allocation concealment                      | Unclear risk                             | No information given                                                                                                                                   |
| Blinding of participants and personnel      | Low risk                                 | Unmasked design, but we judge that lack of blinding is unlikely to affect treatment failure, overall survival, biopsy rate, disease-specific survival. |
| Blinding of outcome assessment              | Low risk                                 | No blinding mentioned, but we judge that lack of blinding is unlikely to affect treatment failure, overall survival,                                   |

|                                         |                                              |                                                                                                                |
|-----------------------------------------|----------------------------------------------|----------------------------------------------------------------------------------------------------------------|
|                                         |                                              | biopsy rate, disease-specific survival.                                                                        |
| Incomplete outcome data                 | Low risk                                     | Losses to follow-up are fairly low                                                                             |
| Selective reporting                     | Unclear risk                                 | No information given                                                                                           |
| Other bias                              | Low risk                                     | No other sources of bias identified                                                                            |
| <b>Risk of bias table for outcome c</b> |                                              |                                                                                                                |
|                                         | <b>Judgement</b> (low/<br>high/unclear risk) | <b>Support for judgement</b>                                                                                   |
| Random sequence generation              | Unclear risk                                 | No information given                                                                                           |
| Allocation concealment                  | Unclear risk                                 | No information given                                                                                           |
| Blinding of participants and personnel  | High risk (need further discussion)          | Unmasked design, and lack of blinding could influence reporting of adverse effects                             |
| Blinding of outcome assessment          | High risk (need further discussion)          | No blinding of outcome assessors mentioned, and lack of blinding could influence assessment of adverse effects |
| Incomplete outcome data                 | Low risk                                     | Losses to follow-up are fairly low                                                                             |
| Selective reporting                     | Unclear risk                                 | No information given                                                                                           |
| Other bias                              | Low risk                                     | No other sources of bias identified                                                                            |

**Study ID: MRC RT01**

|                                             |                                              |                                                                                                                                                                                                               |
|---------------------------------------------|----------------------------------------------|---------------------------------------------------------------------------------------------------------------------------------------------------------------------------------------------------------------|
| <b>Risk of bias table for outcomes a, b</b> |                                              |                                                                                                                                                                                                               |
|                                             | <b>Judgement</b> (low/<br>high/unclear risk) | <b>Support for judgement</b>                                                                                                                                                                                  |
| Random sequence generation                  | Low risk                                     | Computer-based minimisation algorithm                                                                                                                                                                         |
| Allocation concealmentLow                   | Low risk                                     | Central allocation                                                                                                                                                                                            |
| Blinding of participants and personnel      | Low risk                                     | Unmasked design, but we judge that lack of blinding is unlikely to affect overall survival                                                                                                                    |
| Blinding of outcome assessment              | Low risk                                     | Unmasked design, but we judge that lack of blinding is unlikely to affect overall survival                                                                                                                    |
| Incomplete outcome data                     | Unclear risk                                 | Losses to follow-up are disclosed and appear balanced across groups for other outcomes reported, but we can't adjust for losses to follow-up for overall survival since this outcome isn't formally reported. |
| Selective reporting                         | Low risk                                     | Outcomes pre-specified in trial protocol                                                                                                                                                                      |

|                                         |                                              |                                                                                                                  |
|-----------------------------------------|----------------------------------------------|------------------------------------------------------------------------------------------------------------------|
| Other bias                              | Low risk                                     | No other sources of bias identified.                                                                             |
| <b>Risk of bias table for outcome c</b> |                                              |                                                                                                                  |
|                                         | <b>Judgement</b> (low/<br>high/unclear risk) | <b>Support for judgement</b>                                                                                     |
| Random sequence generation              | Low risk                                     | Computer-based minimisation algorithm                                                                            |
| Allocation concealment                  | Low risk                                     | Central allocation                                                                                               |
| Blinding of participants and personnel  | High risk                                    | Unmasked design, and lack of blinding could influence reporting of adverse effects                               |
| Blinding of outcome assessment          | High risk                                    | No blinding of outcome assessors mentioned, and lack of blinding could influence assessment of adverse effects   |
| Incomplete outcome data                 | Low risk                                     | Adjustment made for losses to follow-up in calculation of the hazard ratios and cumulative proportions reported. |
| Selective reporting                     | Low risk                                     | Outcomes pre-specified in trial protocol                                                                         |
| Other bias                              | Low risk                                     | No other sources of bias identified.                                                                             |

**Study ID: Chin 2008**

|                                             |                                              |                                                                                                                                                                                    |
|---------------------------------------------|----------------------------------------------|------------------------------------------------------------------------------------------------------------------------------------------------------------------------------------|
| <b>Risk of bias table for outcomes a, b</b> |                                              |                                                                                                                                                                                    |
|                                             | <b>Judgement</b> (low/<br>high/unclear risk) | <b>Support for judgement</b>                                                                                                                                                       |
| Random sequence generation                  | Unclear risk                                 | No information given                                                                                                                                                               |
| Allocation concealment                      | Unclear risk                                 | No information given                                                                                                                                                               |
| Blinding of participants and personnel      | Low risk                                     | Unmasked design, but we judge that lack of blinding is unlikely to affect biochemical disease-free survival, disease specific survival, overall survival and positive biopsy       |
| Blinding of outcome assessment              | Low risk                                     | No blinding mentioned, but we judge that lack of blinding is unlikely to affect biochemical disease-free survival, disease specific survival, overall survival and positive biopsy |
| Incomplete outcome data                     | Unclear risk                                 | No information given                                                                                                                                                               |
| Selective reporting                         | Unclear risk                                 | No information given                                                                                                                                                               |
| Other bias                                  | Low risk                                     | No other sources of bias identified.                                                                                                                                               |
| <b>Risk of bias table for outcome c</b>     |                                              |                                                                                                                                                                                    |

|                                        | <b>Judgement</b> (low/<br>high/unclear risk) | <b>Support for judgement</b>                                                                                   |
|----------------------------------------|----------------------------------------------|----------------------------------------------------------------------------------------------------------------|
| Random sequence generation             | Unclear risk                                 | No information given                                                                                           |
| Allocation concealment                 | Unclear risk                                 | No information given                                                                                           |
| Blinding of participants and personnel | High risk                                    | Unmasked design, and lack of blinding could influence reporting of adverse effects                             |
| Blinding of outcome assessment         | High risk                                    | No blinding of outcome assessors mentioned, and lack of blinding could influence assessment of adverse effects |
| Incomplete outcome data                | Unclear risk                                 | No information given                                                                                           |
| Selective reporting                    | Unclear risk                                 | No information given                                                                                           |
| Other bias                             | Low risk                                     | No other sources of bias identified.                                                                           |

**Study ID: MRC RT01 pilot trial****Risk of bias table for outcome b**

|                                        | <b>Judgement</b> (low/<br>high/unclear risk) | <b>Support for judgement</b>                                                                                  |
|----------------------------------------|----------------------------------------------|---------------------------------------------------------------------------------------------------------------|
| Random sequence generation             | Low                                          | Randomised permuted block design                                                                              |
| Allocation concealment                 | Low                                          | Independent randomisation was undertaken by ICR Clinical Trials and Statistics Unit.                          |
| Blinding of participants and personnel | Low                                          | unlikely to pose any conceptual risks to the ascertainment of biochemical failure or local/metastatic failure |
| Blinding of outcome assessment         | Low                                          | unlikely to pose any conceptual risks to the ascertainment of biochemical failure or local/metastatic failure |
| Incomplete outcome data                | Low                                          | Losses of follow-up disclosed                                                                                 |
| Selective reporting                    | Unclear                                      | Unclear whether outcomes reported were pre-specified in the protocol.                                         |
| Other bias                             | Low                                          | Not identified                                                                                                |

**Risk of bias table for outcome c**

|                            | <b>Judgement</b> (low/<br>high/unclear risk) | <b>Support for judgement</b>     |
|----------------------------|----------------------------------------------|----------------------------------|
| Random sequence generation | Low                                          | Randomised permuted block design |

|                                        |           |                                                                                                                |
|----------------------------------------|-----------|----------------------------------------------------------------------------------------------------------------|
| Allocation concealment                 | Low       | Independent randomisation was undertaken by ICR Clinical Trials and Statistics Unit.                           |
| Blinding of participants and personnel | High risk | Unmasked design, and lack of blinding could influence reporting of adverse effects                             |
| Blinding of outcome assessment         | High risk | No blinding of outcome assessors mentioned, and lack of blinding could influence assessment of adverse effects |
| Incomplete outcome data                | Low       | Losses of follow-up disclosed                                                                                  |
| Selective reporting                    | Unclear   | Unclear whether outcomes reported were pre-specified in the protocol.                                          |
| Other bias                             | Low       | Not identified                                                                                                 |

**Study ID: Akakura 2006**

| <b>Risk of bias table for outcomes a, b</b> |                                          |                                                                                                                                                                                                         |
|---------------------------------------------|------------------------------------------|---------------------------------------------------------------------------------------------------------------------------------------------------------------------------------------------------------|
|                                             | <b>Judgement (low/high/unclear risk)</b> | <b>Support for judgement</b>                                                                                                                                                                            |
| Random sequence generation                  | Unclear risk                             | No details given, but may be reported in the earlier design paper                                                                                                                                       |
| Allocation concealment                      | Unclear risk                             | No details given, but may be reported in the earlier design paper                                                                                                                                       |
| Blinding of participants and personnel      | Low risk                                 | Unmasked design, but we judge that lack of blinding is unlikely to affect biochemical progression-free survival, clinical progression-free survival, cause-specific survival and overall survival       |
| Blinding of outcome assessment              | Low risk                                 | No blinding mentioned, but we judge that lack of blinding is unlikely to affect biochemical progression-free survival, clinical progression-free survival, cause-specific survival and overall survival |
| Incomplete outcome data                     | Unclear risk                             | No information given                                                                                                                                                                                    |
| Selective reporting                         | Unclear risk                             | No information given                                                                                                                                                                                    |
| Other bias                                  | Low risk                                 | No other sources of bias identified                                                                                                                                                                     |

**Study ID: Arcangeli 2010**

| <b>Risk of bias table for outcome c</b> |                                          |                              |
|-----------------------------------------|------------------------------------------|------------------------------|
|                                         | <b>Judgement (low/high/unclear risk)</b> | <b>Support for judgement</b> |
| Random sequence generation              | Unclear risk                             | No information               |

|                                             |                                          |                                                                                                        |
|---------------------------------------------|------------------------------------------|--------------------------------------------------------------------------------------------------------|
| Allocation concealment                      | Unclear risk                             | No information                                                                                         |
| Blinding of participants and personnel      | High risk                                | Lack of blinding is likely to poses conceptual risks to toxicity assessment                            |
| Blinding of outcome assessment              | High risk                                | Lack of blinding is likely to pose conceptual risk to the toxicity assessment.                         |
| Incomplete outcome data                     | Low risk                                 | No lost to follow-up                                                                                   |
| Selective reporting                         | Unclear risk                             | No protocol information                                                                                |
| Other bias                                  | Low risk                                 | Not identified                                                                                         |
| <b>Risk of bias table for outcomes a, b</b> |                                          |                                                                                                        |
|                                             | <b>Judgement (low/high/unclear risk)</b> | <b>Support for judgement</b>                                                                           |
| Random sequence generation                  | Unclear risk                             | No information                                                                                         |
| Allocation concealment                      | Unclear risk                             | No information                                                                                         |
| Blinding of participants and personnel      | Low risk                                 | We judge that blinding is less likely to poses high risk on survival and biochemical/clinical outcomes |
| Blinding of outcome assessment              | Low risk                                 | We judge that blinding is less likely to poses high risk on survival and biochemical/clinical outcomes |
| Incomplete outcome data                     | Low risk                                 | No lost to follow-up                                                                                   |
| Selective reporting                         | Unclear risk                             | No protocol information                                                                                |
| Other bias                                  | Low risk                                 | Not identified                                                                                         |

**Study ID: Kopper trial**

|                                         |                                          |                                                                                 |
|-----------------------------------------|------------------------------------------|---------------------------------------------------------------------------------|
| <b>Risk of bias table for outcome c</b> |                                          |                                                                                 |
|                                         | <b>Judgement (low/high/unclear risk)</b> | <b>Support for judgement</b>                                                    |
| Random sequence generation              | Unclear                                  | No information                                                                  |
| Allocation concealment                  | Unclear                                  | No information                                                                  |
| Blinding of participants and personnel  | High                                     | Lack of blinding is likely to pose conceptual risks to the toxicity assessment. |
| Blinding of outcome assessment          | High                                     | Lack of blinding is likely to pose conceptual risks to the toxicity assessment. |
| Incomplete outcome data                 | Low                                      | Follow-up completed in (Kopper 2004)                                            |

|                     |         |                                              |
|---------------------|---------|----------------------------------------------|
| Selective reporting | Unclear | Not clear which outcomes were pre-specified. |
| Other bias          | Low     | No other sources of bias identified          |

**Study ID: Lukka 2005****Risk of bias table for outcomes a, b**

|                                        | <b>Judgement</b> (low/<br>high/unclear risk) | <b>Support for judgement</b>                                                                                                                                                                                                                       |
|----------------------------------------|----------------------------------------------|----------------------------------------------------------------------------------------------------------------------------------------------------------------------------------------------------------------------------------------------------|
| Random sequence generation             | Low risk                                     | "Patients were assigned...according to a central computer-generated randomization schedule..."                                                                                                                                                     |
| Allocation concealment                 | Low risk                                     | Central allocation                                                                                                                                                                                                                                 |
| Blinding of participants and personnel | Low risk                                     | Unmasked design, but we judge that lack of blinding is unlikely to affect overall survival.                                                                                                                                                        |
| Blinding of outcome assessment         | Low risk                                     | Unmasked design, but we judge that lack of blinding is unlikely to affect measurement of overall survival.                                                                                                                                         |
| Incomplete outcome data                | Low risk                                     | Losses to follow-up are balanced across groups, and taken into account in analysis.                                                                                                                                                                |
| Selective reporting                    | Low risk                                     | Methods section implies that all outcomes reported were pre-specified and approved by the study Steering Committee. The primary outcome was altered to an outcome of increasing importance in emerging literature, before the data were unblinded. |
| Other bias                             | Low risk                                     | No other sources of bias identified.                                                                                                                                                                                                               |

**Risk of bias table for outcome c**

|                                        | <b>Judgement</b> (low/<br>high/unclear risk) | <b>Support for judgement</b>                                                                                                                                                                                                                       |
|----------------------------------------|----------------------------------------------|----------------------------------------------------------------------------------------------------------------------------------------------------------------------------------------------------------------------------------------------------|
| Random sequence generation             | Low risk                                     | "Patients were assigned...according to a central computer-generated randomization schedule..."                                                                                                                                                     |
| Allocation concealment                 | Low risk                                     | Central allocation                                                                                                                                                                                                                                 |
| Blinding of participants and personnel | High risk                                    | Lack of blinding is likely to pose conceptual risks to the toxicity assessment.                                                                                                                                                                    |
| Blinding of outcome assessment         | High risk                                    | Lack of blinding is likely to pose conceptual risks to the toxicity assessment.                                                                                                                                                                    |
| Incomplete outcome data                | Low risk                                     | Losses to follow-up are balanced across groups, and taken into account in analysis.                                                                                                                                                                |
| Selective reporting                    | Low risk                                     | Methods section implies that all outcomes reported were pre-specified and approved by the study Steering Committee. The primary outcome was altered to an outcome of increasing importance in emerging literature, before the data were unblinded. |



|            |          |                                      |
|------------|----------|--------------------------------------|
| Other bias | Low risk | No other sources of bias identified. |
|------------|----------|--------------------------------------|

**Study ID: Marzi 2009**

| <b>Risk of bias table for outcome c</b> |                                              |                                                                                                                |
|-----------------------------------------|----------------------------------------------|----------------------------------------------------------------------------------------------------------------|
|                                         | <b>Judgement</b> (low/<br>high/unclear risk) | <b>Support for judgement</b>                                                                                   |
| Random sequence generation              | Unclear risk                                 | No information.                                                                                                |
| Allocation concealment                  | Unclear risk                                 | No information.                                                                                                |
| Blinding of participants and personnel  | High risk                                    | Unmasked design, and lack of blinding could influence reporting of adverse effects                             |
| Blinding of outcome assessment          | High risk                                    | No blinding of outcome assessors mentioned, and lack of blinding could influence assessment of adverse effects |
| Incomplete outcome data                 | High risk                                    | Losses to follow-up are fairly high and no information is given about the patients lost to follow-up.          |
| Selective reporting                     | Unclear risk                                 | Not clear which outcomes were pre-specified.                                                                   |
| Other bias                              | Low risk                                     | No other sources of bias identified.                                                                           |

**Study ID: Norkus 2009**

| <b>Risk of bias table for outcomes a, b</b> |                                              |                                                                                                                                                                                     |
|---------------------------------------------|----------------------------------------------|-------------------------------------------------------------------------------------------------------------------------------------------------------------------------------------|
|                                             | <b>Judgement</b> (low/<br>high/unclear risk) | <b>Support for judgement</b>                                                                                                                                                        |
| Random sequence generation                  | Unclear                                      | Methods not stated                                                                                                                                                                  |
| Allocation concealment                      | Unclear                                      | Methods not stated                                                                                                                                                                  |
| Blinding of participants and personnel      | Low risk                                     | Unmasked design, but we judge that lack of blinding is unlikely to pose any conceptual risks to the ascertainment of mortality and disease control.                                 |
| Blinding of outcome assessment              | Low risk                                     | Unmasked design, but we judge that lack of blinding is unlikely to pose any conceptual risks to the ascertainment of mortality and disease control.                                 |
| Incomplete outcome data                     | Low risk                                     | Low losses to follow-up                                                                                                                                                             |
| Selective reporting                         | Low risk                                     | The two 2009 papers list the planned endpoints and report the early 12-month findings. It's unlikely that other pre-specified outcomes would be omitted at this stage of the trial. |
| Other bias                                  | Low risk                                     | No other bias identified                                                                                                                                                            |

## Study ID: Dutch trial

| Risk of bias table for outcomes a, b      |                                       |                                                                                                         |
|-------------------------------------------|---------------------------------------|---------------------------------------------------------------------------------------------------------|
|                                           | Judgement (low/<br>high/unclear risk) | Support for judgement                                                                                   |
| Random sequence generation                | Low risk                              | Random assignment was performed with a minimization technique with stratification for treatment group   |
| Allocation concealment                    | Low risk                              | Random assignment was performed with a minimization technique with stratification for treatment group   |
| Blinding of participants and personnel    | Low risk                              | Not clear but low risk for mortality                                                                    |
| Blinding of outcome assessment            | Low risk                              | Not clear but low risk for mortality                                                                    |
| Incomplete outcome data                   | Low risk                              | Losses to follow-up disclosed.                                                                          |
| Selective reporting                       | Unclear risk                          | Not clear which outcomes were pre-specified.                                                            |
| Other bias                                | Low risk                              | No other sources of bias identified.                                                                    |
| Risk of bias table for the rest outcome c |                                       |                                                                                                         |
|                                           | Judgement (low/<br>high/unclear risk) | Support for judgement                                                                                   |
| Random sequence generation                | Low risk                              | Random assignment was performed with a minimization technique with stratification for treatment group   |
| Allocation concealment                    | Low risk                              | Random assignment was performed with a minimization technique with stratification for treatment group   |
| Blinding of participants and personnel    | High risk                             | Unmasked design, and lack of blinding could influence reporting of toxicity                             |
| Blinding of outcome assessment            | High risk                             | No blinding of outcome assessors mentioned, and lack of blinding could influence assessment of toxicity |
| Incomplete outcome data                   | Low risk                              | Losses to follow-up disclosed.                                                                          |
| Selective reporting                       | Unclear risk                          | Not clear which outcomes were pre-specified.                                                            |
| Other bias                                | Low risk                              | No other sources of bias identified.                                                                    |

## Study ID: M. D. Anderson trial

| Risk of bias table for outcomes a, b |                                       |                       |
|--------------------------------------|---------------------------------------|-----------------------|
|                                      | Judgement (low/<br>high/unclear risk) | Support for judgement |
|                                      |                                       |                       |

|                                         |                                          |                                                                                                                                                                  |
|-----------------------------------------|------------------------------------------|------------------------------------------------------------------------------------------------------------------------------------------------------------------|
| Random sequence generation              | Unclear risk                             | No information.                                                                                                                                                  |
| Allocation concealment                  | Unclear risk                             | No information.                                                                                                                                                  |
| Blinding of participants and personnel  | Low risk                                 | Unmasked design, but we judge that lack of blinding is unlikely to pose any conceptual risks to the ascertainment of mortality and disease progression outcomes. |
| Blinding of outcome assessment          | Low risk                                 | Unmasked design, but we judge that lack of blinding is unlikely to pose any conceptual risks to the ascertainment of mortality and disease progression outcomes. |
| Incomplete outcome data                 | Unclear risk                             | No data on losses to follow-up                                                                                                                                   |
| Selective reporting                     | Unclear risk                             | Not clear which outcomes were pre-specified.                                                                                                                     |
| Other bias                              | Low risk                                 | No other sources of bias identified.                                                                                                                             |
| <b>Risk of bias table for outcome c</b> |                                          |                                                                                                                                                                  |
|                                         | <b>Judgement</b> (low/high/unclear risk) | <b>Support for judgement</b>                                                                                                                                     |
| Random sequence generation              | Unclear risk                             | No information.                                                                                                                                                  |
| Allocation concealment                  | Unclear risk                             | No information.                                                                                                                                                  |
| Blinding of participants and personnel  | High risk                                | Unmasked design, and lack of blinding could influence reporting of toxicity                                                                                      |
| Blinding of outcome assessment          | High risk                                | No blinding of outcome assessors mentioned, and lack of blinding could influence assessment of toxicity                                                          |
| Incomplete outcome data                 | Unclear risk                             | No data on losses to follow-up                                                                                                                                   |
| Selective reporting                     | Unclear risk                             | Cut-points may have been chosen based on significance.                                                                                                           |
| Other bias                              | Low risk                                 | No other sources of bias identified.                                                                                                                             |



# PRISMA 2009 Checklist

1  
2  
3  
4  
5  
6  
7  
8  
9  
10  
11  
12  
13  
14  
15  
16  
17  
18  
19  
20  
21  
22  
23  
24  
25  
26  
27  
28  
29  
30  
31  
32  
33  
34  
35  
36  
37  
38  
39  
40  
41  
42  
43  
44  
45  
46  
47  
48  
49

| Section/topic                      | #  | Checklist item                                                                                                                                                                                                                                                                                              | Reported on page # |
|------------------------------------|----|-------------------------------------------------------------------------------------------------------------------------------------------------------------------------------------------------------------------------------------------------------------------------------------------------------------|--------------------|
| <b>TITLE</b>                       |    |                                                                                                                                                                                                                                                                                                             |                    |
| Title                              | 1  | Identify the report as a systematic review, meta-analysis, or both.                                                                                                                                                                                                                                         | 1                  |
| <b>ABSTRACT</b>                    |    |                                                                                                                                                                                                                                                                                                             |                    |
| Structured summary                 | 2  | Provide a structured summary including, as applicable: background; objectives; data sources; study eligibility criteria, participants, and interventions; study appraisal and synthesis methods; results; limitations; conclusions and implications of key findings; systematic review registration number. | 2                  |
| <b>INTRODUCTION</b>                |    |                                                                                                                                                                                                                                                                                                             |                    |
| Rationale                          | 3  | Describe the rationale for the review in the context of what is already known.                                                                                                                                                                                                                              | 4 – 5              |
| Objectives                         | 4  | Provide an explicit statement of questions being addressed with reference to participants, interventions, comparisons, outcomes, and study design (PICOS).                                                                                                                                                  | 4 – 5              |
| <b>METHODS</b>                     |    |                                                                                                                                                                                                                                                                                                             |                    |
| Protocol and registration          | 5  | Indicate if a review protocol exists, if and where it can be accessed (e.g., Web address), and, if available, provide registration information including registration number.                                                                                                                               | N/A                |
| Eligibility criteria               | 6  | Specify study characteristics (e.g., PICOS, length of follow-up) and report characteristics (e.g., years considered, language, publication status) used as criteria for eligibility, giving rationale.                                                                                                      | 6                  |
| Information sources                | 7  | Describe all information sources (e.g., databases with dates of coverage, contact with study authors to identify additional studies) in the search and date last searched.                                                                                                                                  | 6                  |
| Search                             | 8  | Present full electronic search strategy for at least one database, including any limits used, such that it could be repeated.                                                                                                                                                                               | Appendix 1         |
| Study selection                    | 9  | State the process for selecting studies (i.e., screening, eligibility, included in systematic review, and, if applicable, included in the meta-analysis).                                                                                                                                                   | 6 – 7<br>Figure 1  |
| Data collection process            | 10 | Describe method of data extraction from reports (e.g., piloted forms, independently, in duplicate) and any processes for obtaining and confirming data from investigators.                                                                                                                                  | 7                  |
| Data items                         | 11 | List and define all variables for which data were sought (e.g., PICOS, funding sources) and any assumptions and simplifications made.                                                                                                                                                                       | 7                  |
| Risk of bias in individual studies | 12 | Describe methods used for assessing risk of bias of individual studies (including specification of whether this was done at the study or outcome level), and how this information is to be used in any data synthesis.                                                                                      | 7                  |
| Summary measures                   | 13 | State the principal summary measures (e.g., risk ratio, difference in means).                                                                                                                                                                                                                               | 8                  |
| Synthesis of results               | 14 | Describe the methods of handling data and combining results of studies, if done, including measures of consistency (e.g., $I^2$ ) for each meta-analysis.                                                                                                                                                   | 8 – 10             |

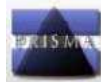

# PRISMA 2009 Checklist

1  
2  
3  
4  
5  
6  
7  
8  
9  
10  
11  
12  
13  
14  
15  
16  
17  
18  
19  
20  
21  
22  
23  
24  
25  
26  
27  
28  
29  
30  
31  
32  
33  
34  
35  
36  
37  
38  
39  
40  
41  
42  
43  
44  
45  
46  
47  
48  
49

| Section/topic                 | #  | Checklist item                                                                                                                                                                                           | Reported on page # |
|-------------------------------|----|----------------------------------------------------------------------------------------------------------------------------------------------------------------------------------------------------------|--------------------|
| Risk of bias across studies   | 15 | Specify any assessment of risk of bias that may affect the cumulative evidence (e.g., publication bias, selective reporting within studies).                                                             | 7 – 10             |
| Additional analyses           | 16 | Describe methods of additional analyses (e.g., sensitivity or subgroup analyses, meta-regression), if done, indicating which were pre-specified.                                                         | 9 – 10             |
| <b>RESULTS</b>                |    |                                                                                                                                                                                                          |                    |
| Study selection               | 17 | Give numbers of studies screened, assessed for eligibility, and included in the review, with reasons for exclusions at each stage, ideally with a flow diagram.                                          | 11                 |
| Study characteristics         | 18 | For each study, present characteristics for which data were extracted (e.g., study size, PICOS, follow-up period) and provide the citations.                                                             | Appendix 2         |
| Risk of bias within studies   | 19 | Present data on risk of bias of each study and, if available, any outcome level assessment (see item 12).                                                                                                | Figure 2           |
| Results of individual studies | 20 | For all outcomes considered (benefits or harms), present, for each study: (a) simple summary data for each intervention group (b) effect estimates and confidence intervals, ideally with a forest plot. | 12 – 14            |
| Synthesis of results          | 21 | Present results of each meta-analysis done, including confidence intervals and measures of consistency.                                                                                                  | 12 – 14            |
| Risk of bias across studies   | 22 | Present results of any assessment of risk of bias across studies (see Item 15).                                                                                                                          | Appendix 3         |
| Additional analysis           | 23 | Give results of additional analyses, if done (e.g., sensitivity or subgroup analyses, meta-regression [see Item 16]).                                                                                    | 12 – 21            |
| <b>DISCUSSION</b>             |    |                                                                                                                                                                                                          |                    |
| Summary of evidence           | 24 | Summarize the main findings including the strength of evidence for each main outcome; consider their relevance to key groups (e.g., healthcare providers, users, and policy makers).                     | 23                 |
| Limitations                   | 25 | Discuss limitations at study and outcome level (e.g., risk of bias), and at review-level (e.g., incomplete retrieval of identified research, reporting bias).                                            | 23                 |
| Conclusions                   | 26 | Provide a general interpretation of the results in the context of other evidence, and implications for future research.                                                                                  | 24                 |
| <b>FUNDING</b>                |    |                                                                                                                                                                                                          |                    |
| Funding                       | 27 | Describe sources of funding for the systematic review and other support (e.g., supply of data); role of funders for the systematic review.                                                               | 25                 |

From: Moher D, Liberati A, Tetzlaff J, Altman DG, The PRISMA Group (2009). Preferred Reporting Items for Systematic Reviews and Meta-Analyses: The PRISMA Statement. PLoS Med 6(6): e1000097. doi:10.1371/journal.pmed1000097

For more information, visit: [www.prisma-statement.org](http://www.prisma-statement.org).

# BMJ Open

## Comparative Efficacy and Safety of Treatments for Localized Prostate Cancer: An Application of Network Meta-Analysis.

|                                 |                                                                                                                                                                                                                                                                                                  |
|---------------------------------|--------------------------------------------------------------------------------------------------------------------------------------------------------------------------------------------------------------------------------------------------------------------------------------------------|
| Journal:                        | <i>BMJ Open</i>                                                                                                                                                                                                                                                                                  |
| Manuscript ID:                  | bmjopen-2013-004285.R2                                                                                                                                                                                                                                                                           |
| Article Type:                   | Research                                                                                                                                                                                                                                                                                         |
| Date Submitted by the Author:   | 13-Apr-2014                                                                                                                                                                                                                                                                                      |
| Complete List of Authors:       | Xiong, Tengbin; University of Cambridge, Department of Oncology<br>Turner, Rebecca; MRC Biostatistics Unit,<br>Wei, Yinghui; MRC Clinical Trials Unit,<br>Neal, David; University of Cambridge,<br>Lyratzopoulos, Georgios; University of Cambridge,<br>Higgins, Julian; MRC Biostatistics Unit, |
| <b>Primary Subject Heading</b>: | Research methods                                                                                                                                                                                                                                                                                 |
| Secondary Subject Heading:      | Evidence based practice, Health services research, Oncology, Urology                                                                                                                                                                                                                             |
| Keywords:                       | Prostate cancer, Treatment, Randomised trials, Systematic review, Meta-analysis                                                                                                                                                                                                                  |
|                                 |                                                                                                                                                                                                                                                                                                  |

SCHOLARONE™  
Manuscripts

1  
2  
3 **COMPARATIVE EFFICACY AND SAFETY OF TREATMENTS FOR LOCALIZED PROSTATE**  
4 **CANCER: AN APPLICATION OF NETWORK META-ANALYSIS**  
5  
6  
7

8 **Tengbin Xiong, PhD**

9 *Research Associate, Department of Oncology, University of Cambridge, Box 279 (S4),*  
10 *Addenbrooke's Hospital, Hills Road, Cambridge, CB2 0QQ, UK*  
11

12  
13 **Rebecca M Turner, PhD**

14 *Statistician, MRC Biostatistics Unit, Institute of Public Health, Forvie Site, Robinson Way,*  
15 *Cambridge, CB2 0SR, UK*  
16

17  
18 **Yinghui Wei, PhD**

19 *Statistician, London Hub for Trials Methodology Research, MRC Clinical Trials Unit,*  
20 *Aviation House, 125 Kingsway, London WC2B 6NH, UK*  
21 *Lecturer in Statistics, School of Computing and Mathematics, Plymouth University,*  
22 *Plymouth, PL4 8AA, UK*  
23  
24

25 **David E Neal, MS, FMedSci, FSB, FRCS, FFPM**

26 *Professor of Surgical Oncology and Hon Consultant Urological Surgeon, Department of*  
27 *Oncology, University of Cambridge, Box 279 (S4), Addenbrooke's Hospital, Hills Road,*  
28 *Cambridge, CB2 0QQ, UK*  
29  
30

31 **Georgios Lyratzopoulos, MD**

32 *Clinical Senior Research Associate in Public Health / Epidemiology, Department of Public*  
33 *Health and Primary Care, Cambridge Centre for Health Services Research, University of*  
34 *Cambridge, Forvie Site, Robinson Way, Cambridge CB2 0SR, UK*  
35  
36

37 **Julian P T Higgins, PhD**

38 *Senior Statistician, MRC Biostatistics Unit, Institute of Public Health, Forvie Site,*  
39 *Robinson Way, Cambridge, CB2 0SR, UK*  
40 *Chair in Evidence Synthesis, Centre for Reviews and Dissemination, University of York,*  
41 *York YO10 5DD, UK*  
42  
43  
44  
45  
46

47 Word count: 2925  
48  
49

50 Key words: *Prostate cancer; Treatment; Randomised trials; Systematic review; Meta-*  
51 *analysis.*  
52  
53  
54

55 Corresponding author: *Tengbin Xiong, Department of Oncology, University of*  
56 *Cambridge, Box 279 (S4), Addenbrooke's Hospital, Hills Road, Cambridge, CB2 0QQ,*  
57 *UK*  
58  
59  
60

**ABSTRACT**

**Context:** There is ongoing uncertainty about the optimal management of patients with localized prostate cancer.

**Objective:** To evaluate the comparative efficacy and safety of different treatments for patients with localized prostate cancer.

**Design:** Systematic review with Bayesian network meta-analysis to estimate comparative odds ratios, and a score (0-100%) that, for a given outcome, reflects average rank order of superiority of each treatment compared against all others, using the surface under the cumulative ranking curve (SUCRA) statistic.

**Data sources:** Electronic searches of Medline without language restriction.

**Study selection:** Randomized trials comparing the efficacy and safety of different primary treatments (48 papers from 21 randomized trials included 7,350 men).

**Data extraction:** Two reviewers independently extracted data and assessed risk of bias.

**Results:** Comparative efficacy and safety evidence was available for prostatectomy, external beam radiotherapy (different types and regimens), observational management and cryotherapy, but not high intensity focused ultrasound (HIFU). There was no evidence of superiority for any of the compared treatments in respect of all-cause mortality after 5 years. Cryotherapy was associated with less gastrointestinal and genitourinary toxicity than radiotherapy (SUCRA: 99% and 77% for gastrointestinal and genitourinary toxicity, respectively).

**Conclusions:** The limited available evidence suggests that different treatments may be optimal for different efficacy and safety outcomes. These findings highlight the importance of informed patient choice and shared-decision making about treatment modality and acceptable trade-offs between different outcomes. More trial evidence is required to reduce uncertainty. Network meta-analysis may be useful to optimise the power of evidence synthesis studies once data from new randomised controlled studies in this field are published in the future.



## ARTICLE SUMMARY

### *Article focus*

- To evaluate the comparative efficacy and safety of different treatments for patients with localized prostate cancer.

### *Key messages*

- Comparative efficacy and safety evidence was available for prostatectomy, external beam radiotherapy (different types and regimens), observational management and cryotherapy, but not high intensity focused ultrasound (HIFU).
- There was no evidence of superiority for any of the compared treatments in respect of all-cause mortality. Different treatments may be optimal for different efficacy and safety outcomes.
- Network meta-analysis may be useful to optimise the power of evidence synthesis studies once data from new randomised controlled studies in this field are published in the future.

### *Strengths and limitations of this study*

- Network meta-analysis enabled us to integrate evidence from both direct comparisons (treatments compared head-to-head within a randomized trial) and indirect comparisons (treatments compared by combining the results of randomized trials with common comparators).
- This network meta-analysis only included randomised controlled trials and the risk of bias in each included study had been comprehensively assessed by using the Cochrane Collaboration's Risk of Bias tool, which strengthens the robustness of evidence synthesis.
- The number of available randomized controlled trials was small which could be a limitation of the study.

## BACKGROUND

Prostate cancer is a worldwide major public health issue.<sup>1</sup> Nearly 75% of diagnosed cases, however, occur in developed countries,<sup>2</sup> where it is typically the most common cancer in men.<sup>3-4</sup> In the UK, about 40,000 men are diagnosed with prostate cancer and 10,000 men die from it every year.<sup>3</sup> In the US, there are 240,000 new diagnoses of prostate cancer, with 34,000 associated deaths every year.<sup>5</sup> Most patients with prostate cancers are diagnosed at an early stage,<sup>6-7</sup> and many diagnoses are made in asymptomatic men.<sup>8-10</sup>

The main treatment options for localized prostate cancer include radical prostatectomy, external beam radiotherapy and observational management (that is, regular testing of clinical, biochemical or radiological markers or as prompted by occurrence of symptoms).<sup>8</sup> Because some of these treatments are associated with substantial risk of side effects, it is important to try to resolve the current uncertainty about the optimal treatment options.

Some randomized trials have compared the efficacy and safety of two or three treatments. For example, the SPCG-4 trial in Europe and the PIVOT study in the US compared radical prostatectomy with observational management.<sup>11-12</sup> The UK Prostate Testing for Cancer and Treatment ( ProtecT) trial is evaluating treatment effectiveness of active monitoring, radical prostatectomy and external beam radiotherapy for clinically localized prostate cancer in men aged 50-69 years identified through population-based PSA testing.<sup>13</sup> The recruitment phase for the ProtecT trial, which began in 1999, has been completed, but outcomes will not be available until a minimum follow-up period has been accrued.

1  
2  
3 It is unlikely that any single trial will compare all available treatment options. We  
4 therefore performed a network meta-analysis based on a systematic review of  
5 completed randomized trials comparing different interventions for patients with  
6 localized prostate cancer. The network meta-analysis allowed us to integrate  
7 evidence from both direct comparisons (treatments compared head-to-head within a  
8 randomized trial) and indirect comparisons (treatments compared by combining the  
9 results of randomized trials with common comparators).<sup>14-16</sup> Our objective was to  
10 apply the established methodology used in network meta-analysis to an area of  
11 clinical practice where no such previous studies existed. In doing so, our aims were  
12 to summarise existing evidence; 'map out' current gaps in comparative evidence to  
13 help motivate the design and conduct of future comparative studies; and develop an  
14 approach 'primed' for subsequent updating and incorporation of future trial evidence.  
15  
16  
17  
18  
19  
20  
21  
22  
23  
24  
25  
26  
27  
28  
29  
30  
31  
32  
33  
34  
35  
36  
37  
38  
39  
40  
41  
42  
43  
44  
45  
46  
47  
48  
49  
50  
51  
52  
53  
54  
55  
56  
57  
58  
59  
60

## METHODS

### Eligibility criteria

We sought completed randomized trials in men with localized prostate cancer that had compared two or more of the following interventions (as primary treatment, with or without the same adjuvant therapy in all arms): prostatectomy; radiotherapy including brachytherapy; cryotherapy; high-intensity focused ultrasound (HIFU) and observational management. Observational management is characterized by testing of clinical, biochemical or radiological markers of disease progression at regular intervals (typically every 6 months) or as prompted by the occurrence of new symptoms, possibly leading to either radical or palliative treatment. We opted to use the term 'observational management' in preference to active surveillance or active monitoring because the latter terms typically aim to keep men in a window of curability so that only those who require it undergo radical treatment.

Eligible trials had to have reported any of the following efficacy and safety outcomes: all-cause mortality, prostate cancer mortality and gastrointestinal or genitourinary toxicity. Studies comparing treatment combinations or sequences (e.g. per protocol management by surgery with subsequent radiotherapy) were excluded.

### Identification of studies

We adopted the search strategy of a systematic review that supported the development of clinical guidelines on the diagnosis and treatment of prostate cancer by the UK's National Institute for Health and Clinical Excellence (NICE) in 2008.<sup>8</sup> Studies had been identified by searching Medline (in 2006) and scanning reference list of papers. We retrieved all relevant randomized trials identified in the NICE guideline and implemented the same search strategies to update the collection of trials. We restricted the search to the period from January 2005 to September 2012.

1  
2  
3 No language limits were placed on the searches (see Appendix 1 for full search  
4 strategies).  
5  
6  
7

### 8 9 **Data extraction**

10  
11 Two reviewers (TX and RT) independently screened all the titles and abstracts of the  
12 studies retrieved by the searches for potentially eligible trials, and then independently  
13 assessed the full articles of these trials to confirm whether they met the eligibility  
14 criteria. The results were checked and discussed by TX and RT to agree upon a final  
15 list of included studies. Using a structured and piloted data collection form, all  
16 relevant data in each included paper were extracted by two reviewers independently  
17 (TX and RT/YW). The data extracted were cross-checked and unresolved  
18 discrepancies were referred to a third reviewer; where necessary, problems were  
19 discussed in a panel meeting (TX, RT, YW, JH and GL) whilst DN acted as a clinical  
20 expert advisor.  
21  
22  
23  
24  
25  
26  
27  
28  
29  
30  
31

32  
33 For each included study, we extracted characteristics of participants and  
34 interventions, outcomes reported and collected, sample size (randomized and  
35 analysed) in each arm, numerical results, losses to follow-up and details of patients  
36 excluded from the analyses.<sup>17</sup> To inform the appropriateness of including studies in  
37 the meta-analysis and facilitate assessment of the strength of the evidence we  
38 assessed the risk of bias in each included study using The Cochrane Collaboration's  
39 Risk of Bias tool.<sup>18</sup> Two reviewers (TX and either RT or YW) completed this  
40 independently and agreed on final assessments. The tool assesses risk of bias  
41 arising from inadequacies in processes of generation of the random allocation  
42 sequence, concealment of the allocation sequence and blinding, and from incomplete  
43 outcome data and selective outcome reporting.  
44  
45  
46  
47  
48  
49  
50  
51  
52  
53  
54  
55  
56  
57  
58  
59  
60

## Outcomes

We analysed all-cause mortality and cancer-related mortality at 5 years, late gastrointestinal and late genitourinary toxicity at 3 years. The choice of these follow-up times was pragmatic, as they were the ones most frequently reported in the included trials. Once these time points had been chosen, we extracted the outcome data from the time nearest to these targeted measurement times. Late gastrointestinal and late genitourinary toxicity were defined as scores  $\geq 2$  measured by the Radiation Therapy Oncology Group (RTOG) questionnaire scale by 3 years follow-up.<sup>19</sup> We have not encompassed biochemical or clinical failure as operational definitions of either of those outcomes tend to be specific to different radical treatment modalities.<sup>20</sup>

## Statistical analyses

Initially, we compared each pair of treatments using direct evidence alone, for each outcome. Separate meta-analyses were performed for each pair-wise comparison of interventions: a random-effects model was fitted within each comparison,<sup>21</sup> with a common between-study heterogeneity variance assumed across comparisons to allow for heterogeneity even when only a single study was available. Results are reported as odds ratios with 95% confidence intervals, for every comparison evaluated directly in one or more studies.

Next, we fitted a network meta-analysis model for each outcome separately,<sup>22</sup> combining direct evidence for each comparison (e.g. from studies comparing interventions A with B) with indirect evidence (e.g. from studies comparing A with C and studies comparing B with C), for all pair-wise comparisons simultaneously. The model accounts explicitly for the binary nature of each outcome using a binomial likelihood function; allows for heterogeneity of treatment effects between trials of the

1  
2  
3 same comparison (assuming the same amount of heterogeneity for each  
4 comparison, irrespective of how many trials address it); and enforces an underlying  
5 relationship between direct and indirect evidence for a particular comparison,  
6 assuming these are consistent between the two sources. For each 'loop' of treatment  
7 comparisons from three or more independent sources and for each outcome, we  
8 computed the difference between estimates from direct and indirect evidence on the  
9 log odds ratio scale.<sup>100</sup> This provides a measure of inconsistency between the  
10 different sources. We did not implement more sophisticated methods for testing or  
11 adjusting for inconsistency, due to the small number of loops in the network.  
12  
13  
14  
15  
16  
17  
18  
19  
20  
21  
22

23 Results are reported as odds ratios with 95% credible intervals, for all pair-wise  
24 comparisons of interventions. All analyses were performed within a Bayesian  
25 framework, using Markov chain Monte Carlo methods in WinBUGS (MRC  
26 Biostatistics Unit, Cambridge, UK).<sup>23</sup> Informative prior distributions were used for the  
27 heterogeneity variance, from a published set of distributions for heterogeneity  
28 expected in meta-analyses examining particular intervention and outcome types,<sup>24</sup>  
29 since heterogeneity is imprecisely estimated when the number of studies is small.  
30 For all-cause mortality, a log-normal (-3.93, 1.51<sup>2</sup>) distribution was used. For  
31 gastrointestinal and genitourinary toxicity, a log-normal (-2.01, 1.64<sup>2</sup>) distribution was  
32 used. For cancer-related mortality, a log-normal (-2.89, 1.91<sup>2</sup>) distribution was used.  
33 Vague N (0, 10<sup>4</sup>) priors were used for all other model parameters. Results were  
34 based on 100,000 iterations, following a burn-in of 20,000 iterations.  
35  
36  
37  
38  
39  
40  
41  
42  
43  
44  
45  
46  
47  
48  
49

50 For each outcome, we estimated the probability that each intervention is superior to  
51 all others, the second best, the third best and so on, from the rank orderings of the  
52 treatments at each iteration of the Markov chain. These ranking probabilities were  
53 used to calculate a summary numerical value: the SUCRA (surface under the  
54 cumulative ranking curve).<sup>25</sup> SUCRA values are expressed as percentages; if an  
55  
56  
57  
58  
59  
60

1  
2  
3 intervention is certainly the best, its SUCRA value would be 100%, and if an  
4  
5 intervention is certainly the worst, its SUCRA value would be 0%. If all interventions  
6  
7 are equivalent, we would expect all SUCRA values to be near 50%. We also report  
8  
9 the median ranks and 95% credible intervals for each intervention.  
10  
11  
12  
13  
14  
15  
16  
17  
18  
19  
20  
21  
22  
23  
24  
25  
26  
27  
28  
29  
30  
31  
32  
33  
34  
35  
36  
37  
38  
39  
40  
41  
42  
43  
44  
45  
46  
47  
48  
49  
50  
51  
52  
53  
54  
55  
56  
57  
58  
59  
60



## RESULTS

### Included studies and interventions

The NICE systematic review<sup>8</sup> had identified 20 reports relating to 14 randomized trials.<sup>26-45</sup> Our updated searches retrieved 1,740 studies and identified 39 reports of relevant randomized trials, of which 30 had not been included in the NICE review (Figure 1).<sup>46-75</sup> One of these reports was the sole report of a trial providing data only on acute toxicity,<sup>40</sup> one paper reported only clinical failure,<sup>38</sup> and one paper reported biochemical failure, biochemical disease-free survival and quality of life;<sup>56</sup> these 3 studies were then excluded since they did not report the outcomes of interest to us. In addition to the remaining 47 full papers from peer-reviewed journals, we identified and included in the analysis data from a conference abstract, describing a randomized trial comparing external beam radiotherapy versus watchful waiting,<sup>76</sup> and reporting data on long term mortality not previously reported in full-text related publications.<sup>77-78</sup>

Our searches also identified 16 relevant systematic reviews.<sup>79-94</sup> We scrutinized the reference lists of all these as well as any further systematic reviews identified by the NICE review, and found no further relevant randomized trials.

The 48 identified reports described 21 randomized trials comparing the effectiveness of different treatments for localized prostate cancer.<sup>26-37, 39, 41-55, 57-76</sup> Seventeen trials reported all-cause mortality, 16 trials reported cancer-related mortality, 16 trials reported gastrointestinal (GI) toxicity, 15 trials reported genitourinary (GU) toxicity.

The characteristics of included studies are summarized in Appendix 2.

The risk of bias assessments for the included trials are illustrated in Figure 2. Most of the evidence was of moderate to good quality. About half of the studies did not report

1  
2  
3 adequate information about allocation sequence generation and allocation sequence  
4 concealment. Unblinded designs were used in all trials included; we judged this  
5 unlikely to cause bias for objectively-measured outcomes such as mortality, but  
6 generate bias in the reporting and assessment of patient-reported toxicity outcomes.  
7  
8 The small number of studies precluded the investigation of potential reporting biases  
9 across studies (for example using funnel plots). Our searches were appropriate, but  
10 the possibility of publication bias cannot be excluded. It is unclear, however, whether  
11 reporting biases would tend to favour any particular treatment (see Appendix 3 for  
12 details of bias assessments for included trials).  
13  
14  
15  
16  
17  
18  
19  
20  
21  
22

23 We categorized the interventions into the following eight categories: observational  
24 management; prostatectomy; conventional radiotherapy (refers to two dimensional  
25 external beam radiation therapy); conventional radiotherapy- hypofractionated (refers  
26 to less than 20 fractions); conformal low dose (LD) radiotherapy (refers to less than  
27 68 Gy); conformal high dose (HD) radiotherapy (refers to more than 74 Gy);  
28 conformal LD radiotherapy-hypofractionated; and cryotherapy. Twenty trials had two  
29 intervention arms. One trial compared three interventions,<sup>54</sup> since two of the three  
30 interventions were very similar and both met our definition of conformal LD  
31 radiotherapy-hypofractionated, we combined the data from these two arms and  
32 regarded the trial as a two-treatment comparison (conformal LD radiotherapy-  
33 hypofractionated versus conformal HD radiotherapy). None of the reviewed studied  
34 assessed brachytherapy and HIFU. Figure 3 illustrates the full network of  
35 comparisons. There were two closed loops of comparisons, one connecting  
36 prostatectomy, observational management and radiotherapy modalities; and the  
37 other connecting different radiotherapy modalities.<sup>100</sup> No inconsistency was detected  
38 in our estimates of the difference between direct and indirect evidence; however,  
39 precision was very low. Cryotherapy only had a single link to the network.  
40  
41  
42  
43  
44  
45  
46  
47  
48  
49  
50  
51  
52  
53  
54  
55  
56  
57  
58  
59  
60

### All-cause mortality

All-cause mortality was reported in 17 trials, covering all the eight interventions of interest. There is no evidence of superiority of any treatment for all-cause mortality. For each pairwise comparison of interventions, the 95% intervals for odds ratios were wide and included 1. The lower-left triangle of results in Table 1 presents odds ratios estimated from direct evidence alone, while the upper-right triangle of results presents odds ratios estimated from the network meta-analysis. The intervals are slightly narrower when based on indirect as well as direct evidence rather than direct evidence alone. The SUCRA values presented in Table 2 summarize the ranking information for all interventions. With respect to all-cause mortality, the highest SUCRA values are 69% for conformal LD radiotehrapy-hypofractionated and 63% for conformal HD radiotherapy, indicating that these are most likely to be among the best treatments for this outcome. However, there is very high uncertainty in the rankings of the interventions, as indicated by wide 95% credible intervals.

### Cancer-related mortality

Cancer-related mortality was reported in 16 trials, covering eight of the interventions. This was a rare outcome in most treatment groups, as expected for patients with localized prostate cancer with a 5 year end point. Odds ratio estimates had wide 95% credible intervals, particularly in comparisons for which only indirect evidence was available, and there was no evidence of superiority for any of the comparator treatments (Table 3). Based on direct comparisons alone, conformal HD radiotherapy was superior to conventional radiotherapy [odds ratio 0.21 (95% interval 0.03, 0.97)] and prostatectomy was superior to observational management [odds ratio 0.60 (95% interval 0.37, 0.98)].

### Gastrointestinal and genitourinary toxicity

Late gastrointestinal toxicity was reported in 16 trials and late genitourinary toxicity was reported in 15 trials. There was evidence that cryotherapy resulted in fewer adverse gastrointestinal events than radiotherapy treatments (estimated odds ratios comparing cryotherapy against the five radiotherapy options ranged from 0.12 to 0.24, whilst all but one of the respective 95% credible intervals excluded 1). The SUCRA value of 99% for cryotherapy and the median rank of 1 (95% interval 1, 2) suggest that cryotherapy is almost certainly superior among the six treatments included in the network meta-analysis in relation to adverse gastrointestinal events (Table 2 and 4). There was also evidence that gastrointestinal toxicity was more likely with conformal HD radiotherapy than with conformal LD radiotherapy.

Interpretation of such findings for toxicity should be more cautious than for the other outcomes, due to a concern that lack of blinding could have led to a risk of detection bias. For genitourinary toxicity, there was no evidence favouring one intervention over another (Table 5), although cryotherapy tended to receive better rankings than the five radiotherapy treatments (Table 2), and the odds ratio estimates favour cryotherapy, but the 95% intervals all included 1.

1  
2  
3  
4  
5  
6  
7  
8  
9  
10  
11  
12  
13  
14  
15  
16  
17  
18  
19  
20  
21  
22  
23  
24  
25  
26  
27  
28  
29  
30  
31  
32  
33  
34  
35  
36  
37  
38  
39  
40  
41  
42  
43  
44  
45  
46  
47  
48  
49

**Table 1.** All-cause mortality: odds ratios (posterior mean with 95% intervals) for each pair-wise comparison of interventions, based on direct evidence alone (lower-left triangle) or direct and indirect evidence (upper-right triangle).

| Intervention                               | Observational management      | Prostatectomy                 | Conventional radiotherapy     | Conventional radiotherapy-hypofractionated | Conformal LD radiotherapy     | Conformal HD radiotherapy     | Conformal LD radiotherapy-hypofractionated | Cryotherapy      |
|--------------------------------------------|-------------------------------|-------------------------------|-------------------------------|--------------------------------------------|-------------------------------|-------------------------------|--------------------------------------------|------------------|
| Observational management                   |                               | 0.79 (0.61,1.02)              | 0.84 (0.48,1.57)              | 0.72 (0.37,1.49)                           | 0.73 (0.44,1.26)              | 0.70 (0.40,1.28)              | 0.53 (0.10,2.88)                           | 0.76 (0.28,1.98) |
| Prostatectomy                              | <sup>3</sup> 0.80 (0.61,1.06) |                               | 1.06 (0.60,2.02)              | 0.91 (0.46,1.90)                           | 0.92 (0.54,1.64)              | 0.88 (0.49,1.66)              | 0.67 (0.12,3.65)                           | 0.96 (0.36,2.56) |
| Conventional radiotherapy                  | -                             | <sup>1</sup> 1.34 (0.55,3.24) |                               | 0.85 (0.59,1.24)                           | 0.86 (0.55,1.35)              | 0.82 (0.51,1.35)              | 0.62 (0.11,3.21)                           | 0.90 (0.41,1.89) |
| Conventional radiotherapy-hypofractionated | -                             | -                             | <sup>2</sup> 0.85 (0.59,1.24) |                                            | 1.01 (0.56,1.80)              | 0.97 (0.53,1.78)              | 0.73 (0.13,3.86)                           | 1.05 (0.44,2.42) |
| Conformal LD radiotherapy                  | <sup>1</sup> 0.66 (0.35,1.21) | -                             | <sup>1</sup> 0.92 (0.50,1.72) | -                                          |                               | 0.96 (0.72,1.29)              | 0.72 (0.14,3.51)                           | 1.04 (0.42,2.49) |
| Conformal HD radiotherapy                  | -                             | -                             | <sup>1</sup> 0.87 (0.39,1.92) | -                                          | <sup>4</sup> 0.95 (0.70,1.31) |                               | 0.74 (0.14,3.61)                           | 1.09 (0.43,2.64) |
| Conformal LD radiotherapy-hypofractionated | -                             | -                             | -                             | -                                          | -                             | <sup>2</sup> 0.78 (0.13,4.25) |                                            | 1.47 (0.22,9.40) |
| Cryotherapy                                | -                             | -                             | <sup>2</sup> 0.90 (0.41,2.02) | -                                          | -                             | -                             | -                                          |                  |

LD: low dose; HD: high dose.

Lower-left results compare row-defining interventions against column-defining interventions. Upper-right results compare column-defining interventions against row-defining interventions.

In the meta-analysis of direct comparisons (reported in lower-left triangle), between-trial heterogeneity  $\tau^2$  was estimated as 0.009 (95% interval 0.001 to 0.08).

In the network meta-analysis (reported in upper-right triangle), between-trial heterogeneity  $\tau^2$  was estimated as 0.009 (95% interval 0.001 to 0.07).

The small superscript numbers in the cells of lower-left triangle indicate the numbers of randomized trials which compared the two interventions directly.

**Table 2.** Ranking of interventions with respect to all-cause and cancer-related mortality, adverse gastrointestinal and genitourinary events: SUCRA (Surface Under the Cumulative RAnking curve) values and median ranks (with 95% intervals).†

| Intervention                               | All-cause mortality |                            | Cancer-related mortality |                            | Adverse gastrointestinal events |                            | Adverse genitourinary events |                            |
|--------------------------------------------|---------------------|----------------------------|--------------------------|----------------------------|---------------------------------|----------------------------|------------------------------|----------------------------|
|                                            | SUCRA value         | Median rank (95% interval) | SUCRA value              | Median rank (95% interval) | SUCRA value                     | Median rank (95% interval) | SUCRA value                  | Median rank (95% interval) |
| Observational management                   | 18%                 | 7 (2, 8)                   | 30%                      | 6 (3, 8)                   | -                               | -                          | -                            | -                          |
| Prostatectomy                              | 49%                 | 5 (1, 7)                   | 64%                      | 4 (1, 7)                   | -                               | -                          | -                            | -                          |
| Conventional radiotherapy                  | 35%                 | 6 (2, 8)                   | 16%                      | 7 (4, 8)                   | 43%                             | 4 (2, 6)                   | 51%                          | 3 (1, 6)                   |
| Conventional radiotherapy-hypofractionated | 58%                 | 4 (1, 8)                   | 44%                      | 5 (1, 8)                   | 42%                             | 4 (1, 6)                   | 50%                          | 3 (1, 6)                   |
| Conformal LD radiotherapy                  | 57%                 | 4 (1, 7)                   | 61%                      | 4 (2, 7)                   | 67%                             | 2 (2, 4)                   | 66%                          | 3 (1, 5)                   |
| Conformal HD radiotherapy                  | 63%                 | 3 (1, 7)                   | 75%                      | 2 (1, 6)                   | 19%                             | 5 (3, 6)                   | 30%                          | 5 (2, 6)                   |
| Conformal LD radiotherapy-hypofractionated | 69%                 | 1 (1, 8)                   | 85%                      | 1 (1, 8)                   | 30%                             | 5 (2, 6)                   | 26%                          | 5 (1, 6)                   |
| Cryotherapy                                | 50%                 | 4 (1, 8)                   | 24%                      | 7 (2, 8)                   | 99%                             | 1 (1, 2)                   | 77%                          | 1 (1, 6)                   |

† The surface under the cumulative ranking curve (SUCRA) value is a numerical summary of the estimated probabilities that each treatment is the best, second best, third best (and so on) for that particular outcome. Higher values indicate higher rankings compared with other treatments. For example, for cryotherapy, the high SUCRA value of 99% and median rank of 1 for adverse gastrointestinal events shows that cryotherapy is expected to be superior with respect to this outcome.

LD: low dose; HD: high dose.

**Table 3.** Prostate cancer-caused mortality: odds ratios (posterior mean with 95% intervals) for each pair-wise comparison of interventions, based on direct evidence alone (lower-left triangle) or direct and indirect evidence (upper-right triangle).

| Intervention                               | Observational management      | Prostatectomy                 | Conventional radiotherapy     | Conventional radiotherapy-hypofractionated | Conformal LD radiotherapy     | Conformal HD radiotherapy      | Conformal LD radiotherapy-hypofractionated | Cryotherapy      |
|--------------------------------------------|-------------------------------|-------------------------------|-------------------------------|--------------------------------------------|-------------------------------|--------------------------------|--------------------------------------------|------------------|
| Observational management                   |                               | 0.63 (0.40,1.02)              | 1.39 (0.49,4.16)              | 0.90 (0.24,3.42)                           | 0.63 (0.29,1.31)              | 0.52 (0.22,1.19)               | 0.13 (0.00*,3.59)                          | 1.37 (0.28,6.89) |
| Prostatectomy                              | <sup>2</sup> 0.60 (0.37,0.98) |                               | 2.20 (0.82,6.37)              | 1.42 (0.39,5.19)                           | 0.99 (0.42,2.26)              | 0.83 (0.32,2.00)               | 0.20 (0.00*,6.07)                          | 2.16 (0.46,10.9) |
| Conventional radiotherapy                  | -                             | <sup>1</sup> 1.65 (0.53,5.44) |                               | 0.64 (0.29,1.41)                           | 0.45 (0.14,1.30)              | 0.38 (0.12,1.06)               | 0.09 (0.00*,3.08)                          | 0.98 (0.28,3.35) |
| Conventional radiotherapy-hypofractionated | -                             | -                             | <sup>2</sup> 0.65 (0.28,1.43) |                                            | 0.70 (0.18,2.65)              | 0.59 (0.15,2.16)               | 0.14 (0.00*,5.08)                          | 1.51 (0.36,6.54) |
| Conformal LD radiotherapy                  | <sup>1</sup> 0.70 (0.31,1.57) | -                             | -                             | -                                          |                               | 0.84 (0.52,1.30)               | 0.20 (0.00*,5.73)                          | 2.20 (0.44,11.4) |
| Conformal HD radiotherapy                  | -                             | -                             | <sup>1</sup> 0.21 (0.03,0.97) | -                                          | <sup>5</sup> 0.86 (0.53,1.37) |                                | 0.25 (0.00*,6.79)                          | 2.61 (0.53,14.1) |
| Conformal LD radiotherapy-hypofractionated | -                             | -                             | -                             | -                                          | -                             | <sup>2</sup> 0.22 (0.00*,6.85) |                                            | 11.2 (0.24,5542) |
| Cryotherapy                                | -                             | -                             | <sup>2</sup> 0.96 (0.27,3.46) | -                                          | -                             | -                              | -                                          |                  |

LD: low dose; HD: high dose.

\* Odds ratio was less than 0.005.

Lower-left results compare row-defining interventions against column-defining interventions. Upper-right results compare column-defining interventions against row-defining interventions.

In the meta-analysis of direct comparisons (reported in lower-left triangle), between-trial heterogeneity  $\tau^2$  was estimated as 0.02 (95% interval 0.001 to 0.31).

In the network meta-analysis (reported in upper-right triangle), between-trial heterogeneity  $\tau^2$  was estimated as 0.02 (95% interval 0.001 to 0.29).

The small superscript numbers in the cells of lower-left triangle indicate the numbers of randomized trials which compared the two interventions directly.

**Table 4.** Adverse gastrointestinal events: odds ratios (posterior mean with 95% intervals) for each pair-wise comparison of interventions, based on direct evidence alone (lower-left triangle) or direct and indirect evidence (upper-right triangle).

| Intervention                               | Observational management         | Prostatectomy | Conventional radiotherapy        | Conventional radiotherapy-hypofractionated | Conformal LD radiotherapy        | Conformal HD radiotherapy        | Conformal LD radiotherapy-hypofractionated | Cryotherapy      |
|--------------------------------------------|----------------------------------|---------------|----------------------------------|--------------------------------------------|----------------------------------|----------------------------------|--------------------------------------------|------------------|
| Observational management                   |                                  | -             | -                                | -                                          | -                                | -                                | -                                          | -                |
| Prostatectomy                              | <sup>2</sup> 0.84<br>(0.33,1.88) |               | -                                | -                                          | -                                | -                                | -                                          | -                |
| Conventional radiotherapy                  | -                                | -             |                                  | 1.01 (0.19,5.29)                           | 0.72 (0.29,1.59)                 | 1.42 (0.57,3.39)                 | 1.26 (0.35,4.30)                           | 0.17 (0.04,0.51) |
| Conventional radiotherapy-hypofractionated | -                                | -             | <sup>1</sup> 1.00<br>(0.22,4.56) |                                            | 0.70 (0.11,4.37)                 | 1.40 (0.21,9.02)                 | 1.24 (0.15,9.76)                           | 0.17 (0.02,1.19) |
| Conformal LD radiotherapy                  | -                                | -             | <sup>2</sup> 0.46<br>(0.17,1.16) | -                                          |                                  | 1.98 (1.18,3.59)                 | 1.77 (0.63,5.11)                           | 0.24 (0.05,0.96) |
| Conformal HD radiotherapy                  | -                                | -             | <sup>1</sup> 2.66<br>(0.85,8.62) | -                                          | <sup>5</sup> 1.73<br>(1.07,2.97) |                                  | 0.89 (0.36,2.15)                           | 0.12 (0.02,0.48) |
| Conformal LD radiotherapy-hypofractionated | -                                | -             | -                                | -                                          | -                                | <sup>3</sup> 0.89<br>(0.39,1.96) |                                            | 0.14 (0.02,0.70) |
| Cryotherapy                                | -                                | -             | <sup>2</sup> 0.18<br>(0.05,0.50) | -                                          | -                                | -                                | -                                          |                  |

LD: low dose; HD: high dose.

Lower-left results compare row-defining interventions against column-defining interventions. Upper-right results compare column-defining interventions against row-defining interventions.

The comparison of prostatectomy with observational management was not linked to the rest of the network, so this evidence was included in the meta-analysis of direct comparisons only.

In the meta-analysis of direct comparisons (reported in lower-left triangle), between-trial heterogeneity  $\tau^2$  was estimated as 0.14 (95% interval 0.01 to 0.97). In the network meta-analysis (reported in upper-right triangle), between-trial heterogeneity  $\tau^2$  was estimated as 0.24 (95% interval 0.02 to 1.23).

The small superscript numbers in the cells of lower-left triangle indicate the numbers of randomized trials which compared the two interventions directly.



**Table 5.** Adverse genitourinary events: odds ratios (posterior mean with 95% intervals) for each pair-wise comparison of interventions, based on direct evidence alone (lower-left triangle) or direct and indirect evidence (upper-right triangle).

| Intervention                               | Observational management      | Prostatectomy | Conventional radiotherapy     | Conventional radiotherapy-hypofractionated | Conformal LD radiotherapy     | Conformal HD radiotherapy     | Conformal LD radiotherapy-hypofractionated | Cryotherapy      |
|--------------------------------------------|-------------------------------|---------------|-------------------------------|--------------------------------------------|-------------------------------|-------------------------------|--------------------------------------------|------------------|
| Observational management                   |                               | -             | -                             | -                                          | -                             | -                             | -                                          | -                |
| Prostatectomy                              | <sup>2</sup> 2.27 (1.34,3.90) |               | -                             | -                                          | -                             | -                             | -                                          | -                |
| Conventional radiotherapy                  | -                             | -             |                               | 1.00 (0.34,2.90)                           | 0.91 (0.54,1.51)              | 1.19 (0.69,2.11)              | 1.41 (0.49,4.07)                           | 0.66 (0.22,2.00) |
| Conventional radiotherapy-hypofractionated | -                             | -             | <sup>1</sup> 1.01 (0.34,3.00) |                                            | 0.90 (0.27,2.97)              | 1.19 (0.36,4.04)              | 1.41 (0.31,6.44)                           | 0.66 (0.14,3.04) |
| Conformal LD radiotherapy                  | -                             | -             | <sup>2</sup> 0.80 (0.43,1.51) | -                                          |                               | 1.32 (0.97,1.86)              | 1.56 (0.61,4.09)                           | 0.73 (0.21,2.52) |
| Conformal HD radiotherapy                  | -                             | -             | <sup>1</sup> 1.53 (0.62,3.82) | -                                          | <sup>5</sup> 1.28 (0.93,1.86) |                               | 1.18 (0.48,2.92)                           | 0.55 (0.16,1.91) |
| Conformal LD radiotherapy-hypofractionated | -                             | -             | -                             | -                                          | -                             | <sup>2</sup> 1.17 (0.48,2.91) |                                            | 0.47 (0.10,2.15) |
| Cryotherapy                                | -                             | -             | <sup>2</sup> 0.68 (0.22,2.03) | -                                          | -                             | -                             | -                                          |                  |

LD: low dose; HD: high dose.

Lower-left results compare row-defining interventions against column-defining interventions. Upper-right results compare column-defining interventions against row-defining interventions.

The comparison of prostatectomy with observational management was not linked to the rest of the network, so this evidence was included in the meta-analysis of direct comparisons only.

In the meta-analysis of direct comparisons (reported in lower-left triangle), between-trial heterogeneity  $\tau^2$  was estimated as 0.04 (95% interval 0.003 to 0.29). In the network meta-analysis (reported in upper-right triangle), between-trial heterogeneity  $\tau^2$  was estimated as 0.04 (95% interval 0.002 to 0.26).

The small superscript numbers in the cells of lower-left triangle indicate the numbers of randomized trials which compared the two interventions directly.

## DISCUSSION

Using network meta-analysis, we were able to combine simultaneously all relevant evidence on treating patients with localized prostate cancer, even in the absence of direct comparative evidence for some treatment pairs, encompassing four efficacy and safety outcomes. Based on data from 21 trials including 7,350 patients randomly assigned among eight different intervention regimes for localized prostate cancer, we found substantial uncertainty about the relative efficacy and safety of different interventions in respect of the studied outcomes.

Assumptions of consistency between direct and indirect evidence were tested to justify the joint synthesis of all studies; however, these tests had little power due to the relatively small number of trials available in most direct comparisons. Instead we must rely on judgements about the similarity of studies included in the analysis in aspects such as patient groups, outcome measures and study methodology. Although we defined the population of interest as patients with localized prostate cancer, there was heterogeneity between individual study populations in terms of the severity of disease. Some of the trials were conducted several decades ago, when surgery and radiology techniques may have been different, and we observed that stage migration has occurred in men diagnosed with prostate cancer, due to emerging bio-marker and image technologies. Furthermore, some of the trials used adjuvant therapy, although this was applied in all the arms within the trial.

Two further limitations warrant mention. Literature searches were completed in September of 2012. However, the results of one of the most important randomized trials – ProtecT study<sup>13</sup> – has not been published so far, and to our knowledge there are no other new relevant RCTs have been reported after this systematic review. Our choices of measurements may have favoured some treatments over others: for example the RTOG scale had been used to define the late gastrointestinal and late genitourinary toxicity in the included studies, but it

1  
2  
3 does not measure incontinence which could be the most common adverse event post-  
4  
5 prostatectomy.<sup>102</sup>  
6  
7

8  
9 Methodologically, we used informative prior distributions based on external evidence for  
10  
11 heterogeneity variances, to increase precision in their estimation and improve estimation of  
12  
13 treatment differences. Data-based informative priors have previously been considered by Lu  
14  
15 & Ades,<sup>101</sup> who used them for the between-study correlation structure. To our knowledge,  
16  
17 our paper is the first application of network meta-analysis incorporating data-based  
18  
19 informative priors for between-study heterogeneity.  
20  
21

22  
23 Our findings have implications for research funding prioritisation and study design; and for  
24  
25 clinical practice. The study identified particular 'weak links' in the network of comparative  
26  
27 treatment options, which might be prioritized for future investment in randomized controlled  
28  
29 trials. This is particularly the case for studies comparing HIFU (which currently is bereft of  
30  
31 any comparative evidence) or brachytherapy against other treatment options, and also for  
32  
33 trials examining the comparative efficacy and safety of prostatectomy versus conformal  
34  
35 radiotherapy modalities. For clinicians, and for men diagnosed with prostate cancer, our  
36  
37 findings highlight that the optimal treatment options may be different in respect of different  
38  
39 outcomes: patients need to be given appropriate information about the uncertainty  
40  
41 surrounding treatment choice currently, and be allowed to opt for 'trade-offs' between  
42  
43 efficacy and safety outcomes as they judge appropriately.<sup>95</sup> Observational studies have  
44  
45 consistently shown that radical prostatectomy has better cause-specific mortality outcomes  
46  
47 compared with radiotherapy.<sup>96-99,103</sup>  
48  
49

50  
51  
52 In conclusion, clinically important information from high quality randomized trials is still  
53  
54 needed to inform decision making regarding primary treatment options for men with localized  
55  
56 prostate cancer. The findings of this study highlight the importance of informed patient  
57  
58 choice and shared-decision making about treatment modality and acceptable trade-offs  
59  
60

1  
2  
3 between multiple outcomes. The upcoming results of the ProtecT study,<sup>13</sup> which is  
4 evaluating effectiveness of multiple therapies in men with PSA-detected localized prostate  
5 cancer, together with other treatment studies in progress, will hopefully contribute to the  
6 evidence base. It is however unlikely that evidential uncertainty about all relevant and  
7 important outcomes will be resolved by these trials, and an updated network meta-analysis  
8 incorporating new evidence may be useful to synthesize the new with the existing evidence.  
9 We demonstrate a high degree of uncertainty about treatment superiority in the management  
10 of localized prostate cancer. Clinicians and patients need to grapple with this uncertainty in  
11 the context of shared-decision making.  
12  
13  
14  
15  
16  
17  
18  
19  
20  
21  
22  
23  
24  
25  
26  
27  
28  
29  
30  
31  
32  
33  
34  
35  
36  
37  
38  
39  
40  
41  
42  
43  
44  
45  
46  
47  
48  
49  
50  
51  
52  
53  
54  
55  
56  
57  
58  
59  
60

1  
2  
3 **Funding and Financial Disclosure:** TX was funded by the National Institute for Health  
4 Research Health Technology Assessment (NIHR HTA) program (HTA 96/20/99). RT was  
5 supported by Medical Research council grant U105285807. GL was supported by a Post-  
6 Doctoral Fellowship Award of the National Institute for Health Research (PDF-2011-04-047).  
7 The funders had no role in study design, data collection and analysis, decision to publish, or  
8 preparation of the manuscript.  
9  
10  
11

12  
13 **Author Contributions:** TX, RT, GL, and JH conceived and designed the study. TX  
14 performed the literature searches. TX, RT, YW, GL, and JH performed the literature review  
15 and data extraction. TX, RT, YW, GL, and JH analyzed the data. TX wrote the first draft of  
16 the manuscript. TX, RT, YW, DN, GL, and JH contributed to the writing of the manuscript.  
17  
18  
19

20  
21 **Competing Interests:** The authors declare that no competing interests exist.  
22  
23

24 **Data Sharing Statement:** Not additional data  
25  
26  
27  
28  
29  
30  
31  
32  
33  
34  
35  
36  
37  
38  
39  
40  
41  
42  
43  
44  
45  
46  
47  
48  
49  
50  
51  
52  
53  
54  
55  
56  
57  
58  
59  
60

## REFERENCES

1. Jemal A, Bray F, Center MM, et al. Global cancer statistics. *CA Cancer J Clin*. Mar-Apr 2011;61(2):69-90.
2. Ferlay J, Shin HR, Bray F, et al. *GLOBOCAN 2008 v1.2, Cancer Incidence and Mortality Worldwide: IARC CancerBase No. 10*. Lyon, France: International Agency for Research on Cancer; 2010. Available from: <http://globocan.iarc.fr>, accessed on 08 Aug 2011.
3. Cancer Research UK. Prostate cancer - UK incidence statistics. <http://info.cancerresearchuk.org/cancerstats/types/prostate/incidence/>. Accessed 08 Aug, 2011.
4. Howlader N, Noone AM, Krapcho M, et al. SEER Cancer Statistics Review, 1975-2008, National Cancer Institute. Bethesda, MD, [http://seer.cancer.gov/csr/1975\\_2008/](http://seer.cancer.gov/csr/1975_2008/), based on November 2010 SEER data submission, posted to the SEER web site. 2011.
5. National Cancer Institute. Prostate Cancer. <http://www.cancer.gov/cancertopics/types/prostate>. Accessed 08 Aug, 2011.
6. National Cancer Institute. Cancer advances in focus - prostate cancer. <http://www.cancer.gov/cancertopics/factsheet/cancer-advances-in-focus/prostate>. Accessed 08 Aug, 2011.
7. Lyrtzopoulos G, Barbiere JM, Greenberg DC, et al. Population based time trends and socioeconomic variation in use of radiotherapy and radical surgery for prostate cancer in a UK region: continuous survey. *BMJ*. 2010;340:c1928.
8. *National Collaborating Centre for Cancer. NICE clinical guideline 58. Prostate cancer: diagnosis and treatment. Evidence review*. London: National Institute for Health and Clinical Excellence; 2008.
9. Heidenreich A, Bastian PJ, Bellmunt J, et al. *Guidelines on prostate cancer*: European Association of Urology; 2012.
10. Thompson I, Thrasher JB, Aus G, et al. *Guideline for the Management of Clinically Localized Prostate Cancer: 2007 Update*.: American Urological Association; 2011.
11. Andersson SO, Andren O, Lyth J, et al. Managing localized prostate cancer by radical prostatectomy or watchful waiting: Cost analysis of a randomized trial (SPCG-4). *Scand J Urol Nephrol*. Apr 2011;45(3):177-183.
12. Wilt TJ, Brawer MK, Barry MJ, et al. The Prostate cancer Intervention Versus Observation Trial:VA/NCI/AHRQ Cooperative Studies Program #407 (PIVOT): design and baseline results of a randomized controlled trial comparing radical prostatectomy to watchful waiting for men with clinically localized prostate cancer. *Contemp Clin Trials*. Jan 2009;30(1):81-87.
13. Donovan J, Mills N, Smith M, et al. Quality improvement report: Improving design and conduct of randomised trials by embedding them in qualitative research: ProtecT (prostate testing for cancer and treatment) study. Commentary: presenting unbiased information to patients can be difficult. *BMJ*. Oct 5 2002;325(7367):766-770.

- 1
- 2
- 3 14. Caldwell DM, Ades AE, Higgins JP. Simultaneous comparison of multiple treatments:  
4 combining direct and indirect evidence. *BMJ*. Oct 15 2005;331(7521):897-900.
- 5
- 6 15. Lu G, Ades AE. Combination of direct and indirect evidence in mixed treatment  
7 comparisons. *Stat Med*. Oct 30 2004;23(20):3105-3124.
- 8
- 9 16. Salanti G, Higgins JP, Ades AE, et al. Evaluation of networks of randomized trials.  
10 *Stat Methods Med Res*. Jun 2008;17(3):279-301.
- 11
- 12 17. Higgins JPT, Green S. *Cochrane Handbook for Systematic Reviews of Interventions*  
13 *Version 5.1.0 [updated March 2011]*. The Cochrane Collaboration. Available from  
14 www.cochrane-handbook.org.; 2011.
- 15
- 16 18. Higgins JP, Altman DG, Gotzsche PC, et al. The Cochrane Collaboration's tool for  
17 assessing risk of bias in randomised trials. *BMJ*. 2011;343:d5928.
- 18
- 19 19. Pilepich MV, Krall JM, Sause WT, et al. Correlation of radiotherapeutic parameters  
20 and treatment related morbidity in carcinoma of the prostate--analysis of RTOG study  
21 75-06. *Int J Radiat Oncol Biol Phys*. Mar 1987;13(3):351-357.
- 22
- 23 20. Nielsen ME, Makarov DV, Humphreys E, et al. Is it possible to compare PSA  
24 recurrence-free survival after surgery and radiotherapy using revised ASTRO  
25 criterion--"nadir + 2"? *Urology*. Aug 2008;72(2):389-393; discussion 394-385.
- 26
- 27 21. Smith TC, Spiegelhalter DJ, Thomas A. Bayesian approaches to random-effects  
28 meta-analysis: a comparative study. *Stat Med*. Dec 30 1995;14(24):2685-2699.
- 29
- 30 22. Dias S, Welton NJ, Sutton AJ, et al. NICE DSU Technical Support Document 2: A  
31 Generalised Linear Modelling Framework for Pairwise and Network Meta-Analysis of  
32 Randomised Controlled Trials. 2011; <http://www.nicedsu.org.uk>. Accessed April,  
33 2012.
- 34
- 35 23. Lunn DJ, Thomas A, Best N, et al. WinBUGS - A Bayesian modelling framework:  
36 Concepts, structure, and extensibility. *Stat Comput*. Oct 2000;10(4):325-337.
- 37
- 38 24. Turner RM, Davey J, Clarke MJ, et al. Predicting the extent of heterogeneity in meta-  
39 analysis, using empirical data from the Cochrane Database of Systematic Reviews.  
40 *International Journal of Epidemiology*. in press.
- 41
- 42 25. Salanti G, Ades AE, Ioannidis JP. Graphical methods and numerical summaries for  
43 presenting results from multiple-treatment meta-analysis: an overview and tutorial. *J*  
44 *Clin Epidemiol*. Feb 2011;64(2):163-171.
- 45
- 46 26. Akakura K, Suzuki H, Ichikawa T, et al. A randomized trial comparing radical  
47 prostatectomy plus endocrine therapy versus external beam radiotherapy plus  
48 endocrine therapy for locally advanced prostate cancer: results at median follow-up  
49 of 102 months. *Jpn J Clin Oncol*. Dec 2006;36(12):789-793.
- 50
- 51 27. Bill-Axelson A, Holmberg L, Ruutu M, et al. Radical prostatectomy versus watchful  
52 waiting in early prostate cancer. *N Engl J Med*. May 12 2005;352(19):1977-1984.
- 53
- 54 28. Chin JL, Ng CK, Touma NJ, et al. Randomized trial comparing cryoablation and  
55 external beam radiotherapy for T2C-T3B prostate cancer. *Prostate Cancer Prostatic*  
56 *Dis*. 2008;11(1):40-45.
- 57
- 58
- 59
- 60



- 1  
2  
3 29. Dearnaley DP, Hall E, Lawrence D, et al. Phase III pilot study of dose escalation  
4 using conformal radiotherapy in prostate cancer: PSA control and side effects. *Br J*  
5 *Cancer*. Feb 14 2005;92(3):488-498.  
6  
7 30. Dearnaley DP, Khoo VS, Norman AR, et al. Comparison of radiation side-effects of  
8 conformal and conventional radiotherapy in prostate cancer: a randomised trial.  
9 *Lancet*. Jan 23 1999;353(9149):267-272.  
10  
11 31. Dearnaley DP, Sydes MR, Graham JD, et al. Escalated-dose versus standard-dose  
12 conformal radiotherapy in prostate cancer: first results from the MRC RT01  
13 randomised controlled trial. *Lancet Oncol*. Jun 2007;8(6):475-487.  
14  
15 32. Dearnaley DP, Sydes MR, Langley RE, et al. The early toxicity of escalated versus  
16 standard dose conformal radiotherapy with neo-adjuvant androgen suppression for  
17 patients with localised prostate cancer: results from the MRC RT01 trial  
18 (ISRCTN47772397). *Radiother Oncol*. Apr 2007;83(1):31-41.  
19  
20 33. Donnelly B, Saliken J, Brasher P, et al. Randomized Trial of External Beam  
21 Radiotherapy Versus Cryoablation in Patients with Localized Prostate Cancer. The  
22 American Urological Association Annual Meeting. Abstract 1141. 2007.  
23  
24 34. Graverson PH, Nielsen KT, Gasser TC, et al. Radical prostatectomy versus  
25 expectant primary treatment in stages I and II prostatic cancer. A fifteen-year follow-  
26 up. *Urology*. Dec 1990;36(6):493-498.  
27  
28 35. Koper PC, Jansen P, van Putten W, et al. Gastro-intestinal and genito-urinary  
29 morbidity after 3D conformal radiotherapy of prostate cancer: observations of a  
30 randomized trial. *Radiother Oncol*. Oct 2004;73(1):1-9.  
31  
32 36. Koper PC, Stroom JC, van Putten WL, et al. Acute morbidity reduction using 3DCRT  
33 for prostate carcinoma: a randomized study. *Int J Radiat Oncol Biol Phys*. Mar 1  
34 1999;43(4):727-734.  
35  
36 37. Lukka H, Hayter C, Julian JA, et al. Randomized trial comparing two fractionation  
37 schedules for patients with localized prostate cancer. *J Clin Oncol*. Sep 1  
38 2005;23(25):6132-6138.  
39  
40 38. Paulson DF, Lin GH, Hinshaw W, et al. Radical surgery versus radiotherapy for  
41 adenocarcinoma of the prostate. *J Urol*. Sep 1982;128(3):502-504.  
42  
43 39. Peeters ST, Heemsbergen WD, Koper PC, et al. Dose-response in radiotherapy for  
44 localized prostate cancer: results of the Dutch multicenter randomized phase III trial  
45 comparing 68 Gy of radiotherapy with 78 Gy. *J Clin Oncol*. May 1 2006;24(13):1990-  
46 1996.  
47  
48 40. Pollack A, Hanlon AL, Horwitz EM, et al. Dosimetry and preliminary acute toxicity in  
49 the first 100 men treated for prostate cancer on a randomized hypofractionation dose  
50 escalation trial. *Int J Radiat Oncol Biol Phys*. Feb 1 2006;64(2):518-526.  
51  
52 41. Pollack A, Zagars GK, Starkschall G, et al. Prostate cancer radiation dose response:  
53 results of the M. D. Anderson phase III randomized trial. *Int J Radiat Oncol Biol Phys*.  
54 Aug 1 2002;53(5):1097-1105.  
55  
56 42. Steineck G, Helgesen F, Adolfsson J, et al. Quality of life after radical prostatectomy  
57 or watchful waiting. *N Engl J Med*. Sep 12 2002;347(11):790-796.  
58  
59  
60



- 1  
2  
3 43. Storey MR, Pollack A, Zagars G, et al. Complications from radiotherapy dose  
4 escalation in prostate cancer: preliminary results of a randomized trial. *Int J Radiat*  
5 *Oncol Biol Phys*. Oct 1 2000;48(3):635-642.  
6  
7 44. Tait DM, Nahum AE, Meyer LC et al. Acute toxicity in pelvic radiotherapy; a  
8 randomised trial of conformal versus conventional treatment. *Radiother Oncol*. Feb  
9 1997;42(2):121-136.  
10  
11 45. Yeoh EE, Fraser RJ, McGowan RE, et al. Evidence for efficacy without increased  
12 toxicity of hypofractionated radiotherapy for prostate carcinoma: early results of a  
13 Phase III randomized trial. *Int J Radiat Oncol Biol Phys*. Mar 15 2003;55(4):943-955.  
14  
15 46. Al-Mamgani A, van Putten WL, Heemsbergen WD, et al. Update of Dutch multicenter  
16 dose-escalation trial of radiotherapy for localized prostate cancer. *Int J Radiat Oncol*  
17 *Biol Phys*. Nov 15 2008;72(4):980-988.  
18  
19 47. Al-Mamgani A, van Putten WL, van der Wielen GJ, et al. Dose escalation and quality  
20 of life in patients with localized prostate cancer treated with radiotherapy: long-term  
21 results of the Dutch randomized dose-escalation trial (CKTO 96-10 trial). *Int J Radiat*  
22 *Oncol Biol Phys*. Mar 15 2011;79(4):1004-1012.  
23  
24 48. Arcangeli G, Fowler J, Gomellini S, et al. Acute and late toxicity in a randomized trial  
25 of conventional versus hypofractionated three-dimensional conformal radiotherapy  
26 for prostate cancer. *Int J Radiat Oncol Biol Phys*. Mar 15 2011;79(4):1013-1021.  
27  
28 49. Arcangeli G, Saracino B, Gomellini S, et al. A prospective phase III randomized trial  
29 of hypofractionation versus conventional fractionation in patients with high-risk  
30 prostate cancer. *Int J Radiat Oncol Biol Phys*. Sep 1 2010;78(1):11-18.  
31  
32 50. Beckendorf V, Guerif S, Le Prise E, et al. 70 Gy versus 80 Gy in localized prostate  
33 cancer: 5-year results of GETUG 06 randomized trial. *Int J Radiat Oncol Biol Phys*.  
34 Jul 15 2011;80(4):1056-1063.  
35  
36 51. Beckendorf V, Guerif S, Le Prise E, et al. The GETUG 70 Gy vs. 80 Gy randomized  
37 trial for localized prostate cancer: feasibility and acute toxicity. *Int J Radiat Oncol Biol*  
38 *Phys*. Nov 15 2004;60(4):1056-1065.  
39  
40 52. Bill-Axelsson A, Holmberg L, Filen F, et al. Radical prostatectomy versus watchful  
41 waiting in localized prostate cancer: the Scandinavian prostate cancer group-4  
42 randomized trial. *J Natl Cancer Inst*. Aug 20 2008;100(16):1144-1154.  
43  
44 53. Bill-Axelsson A, Holmberg L, Ruutu M, et al. Radical prostatectomy versus watchful  
45 waiting in early prostate cancer. *N Engl J Med*. May 5 2011;364(18):1708-1717.  
46  
47 54. Dearnaley D, Syndikus I, Sumo G, et al. Conventional versus hypofractionated high-  
48 dose intensity-modulated radiotherapy for prostate cancer: preliminary safety results  
49 from the CHHiP randomised controlled trial. *Lancet Oncol*. Jan 2012;13(1):43-54.  
50  
51 55. Donnelly BJ, Saliken JC, Brasher PM, et al. A randomized trial of external beam  
52 radiotherapy versus cryoablation in patients with localized prostate cancer. *Cancer*.  
53 Jan 15 2010;116(2):323-330.  
54  
55 56. Giberti C, Chiono L, Gallo F, et al. Radical retropubic prostatectomy versus  
56 brachytherapy for low-risk prostatic cancer: a prospective study. *World J Urol*. Oct  
57 2009;27(5):607-612.  
58  
59  
60

- 1  
2  
3 57. Heemsbergen WD, Hoogeman MS, Witte MG, et al. Increased risk of biochemical  
4 and clinical failure for prostate patients with a large rectum at radiotherapy planning:  
5 results from the Dutch trial of 68 Gy versus 78 Gy. *Int J Radiat Oncol Biol Phys*. Apr  
6 1 2007;67(5):1418-1424.  
7
- 8 58. Johansson E, Bill-Axelsson A, Holmberg L, et al. Time, symptom burden, androgen  
9 deprivation, and self-assessed quality of life after radical prostatectomy or watchful  
10 waiting: the Randomized Scandinavian Prostate Cancer Group Study Number 4  
11 (SPCG-4) clinical trial. *Eur Urol*. Feb 2009;55(2):422-430.  
12
- 13 59. Johansson E, Steineck G, Holmberg L, et al. Long-term quality-of-life outcomes after  
14 radical prostatectomy or watchful waiting: the Scandinavian Prostate Cancer Group-4  
15 randomised trial. *Lancet Oncol*. Sep 2011;12(9):891-899.  
16
- 17 60. Kuban DA, Levy LB, Cheung MR, et al. Long-term failure patterns and survival in a  
18 randomized dose-escalation trial for prostate cancer. Who dies of disease? *Int J*  
19 *Radiat Oncol Biol Phys*. Apr 1 2011;79(5):1310-1317.  
20
- 21 61. Kuban DA, Tucker SL, Dong L, et al. Long-term results of the M. D. Anderson  
22 randomized dose-escalation trial for prostate cancer. *Int J Radiat Oncol Biol Phys*.  
23 Jan 1 2008;70(1):67-74.  
24
- 25 62. Marzi S, Saracino B, Petrongari MG, et al. Modeling of alpha/beta for late rectal  
26 toxicity from a randomized phase II study: conventional versus hypofractionated  
27 scheme for localized prostate cancer. *J Exp Clin Cancer Res*. 2009;28:117.  
28
- 29 63. Norkus D, Miller A, Kurtinaitis J, et al. A randomized trial comparing hypofractionated  
30 and conventionally fractionated three-dimensional external-beam radiotherapy for  
31 localized prostate adenocarcinoma : a report on acute toxicity. *Strahlenther Onkol*.  
32 Nov 2009;185(11):715-721.  
33
- 34 64. Norkus D, Miller A, Plieskiene A, et al. A randomized trial comparing  
35 hypofractionated and conventionally fractionated three-dimensional conformal  
36 external-beam radiotherapy for localized prostate adenocarcinoma: a report on the  
37 first-year biochemical response. *Medicina (Kaunas)*. 2009;45(6):469-475.  
38
- 39 65. Peeters ST, Heemsbergen WD, van Putten WL, et al. Acute and late complications  
40 after radiotherapy for prostate cancer: results of a multicenter randomized trial  
41 comparing 68 Gy to 78 Gy. *Int J Radiat Oncol Biol Phys*. Mar 15 2005;61(4):1019-  
42 1034.  
43
- 44 66. Peeters ST, Lebesque JV, Heemsbergen WD, et al. Localized volume effects for late  
45 rectal and anal toxicity after radiotherapy for prostate cancer. *Int J Radiat Oncol Biol*  
46 *Phys*. Mar 15 2006;64(4):1151-1161.  
47
- 48 67. Robinson JW, Donnelly BJ, Siever JE, et al. A randomized trial of external beam  
49 radiotherapy versus cryoablation in patients with localized prostate cancer: quality of  
50 life outcomes. *Cancer*. Oct 15 2009;115(20):4695-4704.  
51
- 52 68. Syndikus I, Morgan RC, Sydes MR, et al. Late gastrointestinal toxicity after dose-  
53 escalated conformal radiotherapy for early prostate cancer: results from the UK  
54 Medical Research Council RT01 trial (ISRCTN47772397). *Int J Radiat Oncol Biol*  
55 *Phys*. Jul 1 2010;77(3):773-783.  
56  
57  
58  
59  
60

- 1  
2  
3 69. van der Wielen GJ, Hoogeman MS, et al. Dose-volume parameters of the corpora  
4 cavernosa do not correlate with erectile dysfunction after external beam radiotherapy  
5 for prostate cancer: results from a dose-escalation trial. *Int J Radiat Oncol Biol Phys*.  
6 Jul 1 2008;71(3):795-800.  
7
- 8 70. Wilt TJ, Brawer MK, Jones KM, et al. Radical prostatectomy versus observation for  
9 localized prostate cancer. *N Engl J Med*. Jul 19 2012;367(3):203-213.  
10
- 11 71. Yeoh EE, Botten RJ, Butters J, et al. Hypofractionated versus conventionally  
12 fractionated radiotherapy for prostate carcinoma: final results of phase III randomized  
13 trial. *Int J Radiat Oncol Biol Phys*. Dec 1 2011;81(5):1271-1278.  
14
- 15 72. Yeoh EE, Holloway RH, Fraser RJ, et al. Hypofractionated versus conventionally  
16 fractionated radiation therapy for prostate carcinoma: updated results of a phase III  
17 randomized trial. *Int J Radiat Oncol Biol Phys*. Nov 15 2006;66(4):1072-1083.  
18
- 19 73. Yeoh EK, Holloway RH, Fraser RJ, et al Anorectal function after three- versus two-  
20 dimensional radiation therapy for carcinoma of the prostate. *Int J Radiat Oncol Biol*  
21 *Phys*. Jan 1 2009;73(1):46-52.  
22
- 23 74. Zietman AL, Bae K, Slater JD, et al. Randomized trial comparing conventional-dose  
24 with high-dose conformal radiation therapy in early-stage adenocarcinoma of the  
25 prostate: long-term results from proton radiation oncology group/american college of  
26 radiology 95-09. *J Clin Oncol*. Mar 1 2010;28(7):1106-1111.  
27
- 28 75. Zietman AL, DeSilvio ML, Slater JD, et al. Comparison of conventional-dose vs high-  
29 dose conformal radiation therapy in clinically localized adenocarcinoma of the  
30 prostate: a randomized controlled trial. *JAMA*. Sep 14 2005;294(10):1233-1239.  
31
- 32 76. Widmark A. Prospective Randomized Trial Comparing External Beam Radiotherapy  
33 versus Watchful Waiting in Early Prostate Cancer (T1b-T2, pN0, Grade 1-2, M0).  
34 2011 annual meeting of the American Society for Therapeutic Radiology And  
35 Oncology, ASTRO.  
36 <http://www.oncolink.org/conferences/article.cfm?id=2171&ss=350>. 2011.  
37
- 38 77. Fransson P, Damber JE, Tomic R, et al. Quality of life and symptoms in a  
39 randomized trial of radiotherapy versus deferred treatment of localized prostate  
40 carcinoma. *Cancer*. Dec 15 2001;92(12):3111-3119.  
41
- 42 78. Fransson P, Damber JE, Widmark A. Health-related quality of life 10 years after  
43 external beam radiotherapy or watchful waiting in patients with localized prostate  
44 cancer. *Scand J Urol Nephrol*. 2009;43(2):119-126.  
45
- 46 79. Bannuru RR, Dvorak T, Obadan N, et al. Comparative evaluation of radiation  
47 treatments for clinically localized prostate cancer: an updated systematic review. *Ann*  
48 *Intern Med*. Aug 2 2011;155(3):171-178.  
49
- 50 80. Hegarty J, Beirne PV, Walsh E, et al. Radical prostatectomy versus watchful waiting  
51 for prostate cancer. *Cochrane Database Syst Rev*. 2010;11:CD006590.  
52
- 53 81. Hummel S, Simpson EL, Hemingway P, et al. Intensity-modulated radiotherapy for  
54 the treatment of prostate cancer: a systematic review and economic evaluation.  
55 *Health Technol Assess*. Oct 2010;14(47):1-108, iii-iv.  
56  
57  
58  
59  
60

- 1  
2  
3  
4  
5  
6  
7  
8  
9  
10  
11  
12  
13  
14  
15  
16  
17  
18  
19  
20  
21  
22  
23  
24  
25  
26  
27  
28  
29  
30  
31  
32  
33  
34  
35  
36  
37  
38  
39  
40  
41  
42  
43  
44  
45  
46  
47  
48  
49  
50  
51  
52  
53  
54  
55  
56  
57  
58  
59  
60
82. Koukourakis G, Kelekis N, Armonis V, et al. Brachytherapy for prostate cancer: a systematic review. *Adv Urol*. 2009;327945.
83. Morris DE, Emami B, Mauch PM, et al. Evidence-based review of three-dimensional conformal radiotherapy for localized prostate cancer: an ASTRO outcomes initiative. *Int J Radiat Oncol Biol Phys*. May 1 2005;62(1):3-19.
84. Olsen DR, Bruland OS, Frykholm G, et al. Proton therapy - a systematic review of clinical effectiveness. *Radiother Oncol*. May 2007;83(2):123-132.
85. Pasquier D, Ballereau C. Adjuvant and salvage radiotherapy after prostatectomy for prostate cancer: a literature review. *Int J Radiat Oncol Biol Phys*. Nov 15 2008;72(4):972-979.
86. Peinemann F, Grouven U, Bartel C, et al. Permanent interstitial low-dose-rate brachytherapy for patients with localised prostate cancer: a systematic review of randomised and nonrandomised controlled clinical trials. *Eur Urol*. Nov 2011;60(5):881-893.
87. Peinemann F, Grouven U, Hemkens LG, et al. Low-dose rate brachytherapy for men with localized prostate cancer. *Cochrane Database Syst Rev*. 2011(7):CD008871.
88. Pieters BR, de Back DZ, Koning CC, et al. Comparison of three radiotherapy modalities on biochemical control and overall survival for the treatment of prostate cancer: a systematic review. *Radiother Oncol*. Nov 2009;93(2):168-173.
89. Shelley M, Wilt TJ, Coles B, et al. Cryotherapy for localised prostate cancer. *Cochrane Database Syst Rev*. 2007(3):CD005010.
90. Staffurth J. A review of the clinical evidence for intensity-modulated radiotherapy. *Clin Oncol (R Coll Radiol)*. Oct 2010;22(8):643-657.
91. van Tol-Geerdink JJ, Stalmeier PF, Pasker-de Jong PC, et al. Systematic review of the effect of radiation dose on tumor control and morbidity in the treatment of prostate cancer by 3D-CRT. *Int J Radiat Oncol Biol Phys*. Feb 1 2006;64(2):534-543.
92. Viani GA, da Silva LG, Stefano EJ. High-dose conformal radiotherapy reduces prostate cancer-specific mortality: results of a meta-analysis. *Int J Radiat Oncol Biol Phys*. Aug 1 2012;83(5):e619-625.
93. Viani GA, Stefano EJ, Afonso SL. Higher-than-conventional radiation doses in localized prostate cancer treatment: a meta-analysis of randomized, controlled trials. *Int J Radiat Oncol Biol Phys*. Aug 1 2009;74(5):1405-1418.
94. Wilt TJ, MacDonald R, Rutks I, et al. Systematic review: comparative effectiveness and harms of treatments for clinically localized prostate cancer. *Ann Intern Med*. Mar 18 2008;148(6):435-448.
95. Sajid S, Kotwal AA, Dale W. Interventions to improve decision making and reduce racial and ethnic disparities in the management of prostate cancer: a systematic review. *J Gen Intern Med*. Aug 2012;27(8):1068-1078.
96. Abdollah F, Schmitges J, Sun M, et al. Comparison of mortality outcomes after radical prostatectomy versus radiotherapy in patients with localized prostate cancer:

- 1  
2  
3 a population-based analysis. *Int J Urol*. Sep 2012;19(9):836-844; author reply 844-  
4 835.  
5  
6 **97.** Boorjian SA, Karnes RJ, Viterbo R, et al. Long-term survival after radical  
7 prostatectomy versus external-beam radiotherapy for patients with high-risk prostate  
8 cancer. *Cancer*. Jul 1 2011;117(13):2883-2891.  
9  
10 **98.** Cooperberg MR, Vickers AJ, Broering JM, et al. Comparative risk-adjusted mortality  
11 outcomes after primary surgery, radiotherapy, or androgen-deprivation therapy for  
12 localized prostate cancer. *Cancer*. Nov 15 2010;116(22):5226-5234.  
13  
14 **99.** Zelefsky MJ, Eastham JA, Cronin AM, et al. Metastasis after radical prostatectomy or  
15 external beam radiotherapy for patients with clinically localized prostate cancer: a  
16 comparison of clinical cohorts adjusted for case mix. *J Clin Oncol*. Mar 20  
17 2010;28(9):1508-1513.  
18  
19 **100.** Lu G, Ades AE. Assessing evidence inconsistency in mixed treatment comparisons.  
20 *Journal of the American Statistical Association*, 2006;101(474), 447-459.  
21  
22 **101.** Lu G, Ades AE. Modeling between-trial variance structure in mixed treatment  
23 comparisons. *Biostatistics*, 2009;10(4), 792-805.  
24  
25 **102.** Resnick MJ, Koyama T, Fan KH, et al. Long-term functional outcomes after treatment  
26 for localized prostate cancer. *N Engl J Med*, 2013;368(5):436-45.  
27  
28 **103.** Sooriakumaran P1, Nyberg T, Akre O, et al. Comparative effectiveness of radical  
29 prostatectomy and radiotherapy in prostate cancer: observational study of mortality  
30 outcomes. *BMJ*. 2014 Feb 26;348:g1502. doi: 10.1136/bmj.g1502.  
31  
32  
33

### Figure Legends

34  
35  
36  
37 Figure 1. Flow chart of the inclusion process of the studies for network meta-analysis  
38

39  
40 Figure 2. Risk of bias assessments for the included randomized trials  
41

42  
43 Figure 3. Network of comparisons of treatments for localized prostate cancer  
44 showing numbers of trials in which each pairwise comparison had been made  
45  
46  
47  
48  
49  
50  
51  
52  
53  
54  
55  
56  
57  
58  
59  
60



1  
2  
3 **COMPARATIVE EFFICACY AND SAFETY OF TREATMENTS FOR LOCALIZED PROSTATE**  
4 **CANCER: AN APPLICATION OF NETWORK META-ANALYSIS**  
5  
6  
7

8 **Tengbin Xiong, PhD**

9 *Research Associate, Department of Oncology, University of Cambridge, Box 279 (S4),*  
10 *Addenbrooke's Hospital, Hills Road, Cambridge, CB2 0QQ, UK*  
11

12  
13 **Rebecca M Turner, PhD**

14 *Statistician, MRC Biostatistics Unit, Institute of Public Health, Forvie Site, Robinson Way,*  
15 *Cambridge, CB2 0SR, UK*  
16

17  
18 **Yinghui Wei, PhD**

19 *Statistician, London Hub for Trials Methodology Research, MRC Clinical Trials Unit,*  
20 *Aviation House, 125 Kingsway, London WC2B 6NH, UK*  
21 *Lecturer in Statistics, School of Computing and Mathematics, Plymouth University,*  
22 *Plymouth, PL4 8AA, UK*  
23  
24

25 **David E Neal, MS, FMedSci, FSB, FRCS, FFPM**

26 *Professor of Surgical Oncology and Hon Consultant Urological Surgeon, Department of*  
27 *Oncology, University of Cambridge, Box 279 (S4), Addenbrooke's Hospital, Hills Road,*  
28 *Cambridge, CB2 0QQ, UK*  
29  
30

31 **Georgios Lyratzopoulos, MD**

32 *Clinical Senior Research Associate in Public Health / Epidemiology, Department of Public*  
33 *Health and Primary Care, Cambridge Centre for Health Services Research, University of*  
34 *Cambridge, Forvie Site, Robinson Way, Cambridge CB2 0SR, UK*  
35  
36

37 **Julian P T Higgins, PhD**

38 *Senior Statistician, MRC Biostatistics Unit, Institute of Public Health, Forvie Site,*  
39 *Robinson Way, Cambridge, CB2 0SR, UK*  
40 *Chair in Evidence Synthesis, Centre for Reviews and Dissemination, University of York,*  
41 *York YO10 5DD, UK*  
42  
43  
44  
45  
46

47 Word count: 2925  
48

49  
50  
51 Key words: *Prostate cancer; Treatment; Randomised trials; Systematic review; Meta-*  
52 *analysis.*  
53  
54

55 Corresponding author: *Tengbin Xiong, Department of Oncology, University of Cambridge,*  
56 *Box 279 (S4), Addenbrooke's Hospital, Hills Road, Cambridge, CB2 0QQ, UK*  
57  
58  
59  
60

**ABSTRACT**

**Context:** There is ongoing uncertainty about the optimal management of patients with localized prostate cancer.

**Objective:** To evaluate the comparative efficacy and safety of different treatments for patients with localized prostate cancer.

**Design:** Systematic review with Bayesian network meta-analysis to estimate comparative odds ratios, and a score (0-100%) that, for a given outcome, reflects average rank order of superiority of each treatment compared against all others, using the surface under the cumulative ranking curve (SUCRA) statistic.

**Data sources:** Electronic searches of Medline without language restriction.

**Study selection:** Randomized trials comparing the efficacy and safety of different primary treatments (48 papers from 21 randomized trials included 7,350 men).

**Data extraction:** Two reviewers independently extracted data and assessed risk of bias.

**Results:** Comparative efficacy and safety evidence was available for prostatectomy, external beam radiotherapy (different types and regimens), observational management and cryotherapy, but not high intensity focused ultrasound (HIFU). There was no evidence of superiority for any of the compared treatments in respect of all-cause mortality after 5 years. Cryotherapy was associated with less gastrointestinal and genitourinary toxicity than radiotherapy (SUCRA: 99% and 77% for gastrointestinal and genitourinary toxicity, respectively).

**Conclusions:** The limited available evidence suggests that different treatments may be optimal for different efficacy and safety outcomes. These findings highlight the importance of informed patient choice and shared-decision making about treatment modality and acceptable trade-offs between different outcomes. More trial evidence is required to reduce uncertainty. Network meta-analysis may be useful to optimise the power of evidence synthesis studies once data from new randomised controlled studies in this field are published in the future.

## ARTICLE SUMMARY

### *Article focus*

- To evaluate the comparative efficacy and safety of different treatments for patients with localized prostate cancer.

### *Key messages*

- Comparative efficacy and safety evidence was available for prostatectomy, external beam radiotherapy (different types and regimens), observational management and cryotherapy, but not high intensity focused ultrasound (HIFU).
- There was no evidence of superiority for any of the compared treatments in respect of all-cause mortality. Different treatments may be optimal for different efficacy and safety outcomes.
- Network meta-analysis may be useful to optimise the power of evidence synthesis studies once data from new randomised controlled studies in this field are published in the future.

### *Strengths and limitations of this study*

- Network meta-analysis enabled us to integrate evidence from both direct comparisons (treatments compared head-to-head within a randomized trial) and indirect comparisons (treatments compared by combining the results of randomized trials with common comparators).
- This network meta-analysis only included randomised controlled trials and the risk of bias in each included study had been comprehensively assessed by using the Cochrane Collaboration's Risk of Bias tool, which strengthens the robustness of evidence synthesis.
- The number of available randomized controlled trials was small which could be a limitation of the study.



## BACKGROUND

Prostate cancer is a worldwide major public health issue.<sup>1</sup> Nearly 75% of diagnosed cases, however, occur in developed countries,<sup>2</sup> where it is typically the most common cancer in men.<sup>3-4</sup> In the UK, about 40,000 men are diagnosed with prostate cancer and 10,000 men die from it every year.<sup>3</sup> In the US, there are 240,000 new diagnoses of prostate cancer, with 34,000 associated deaths every year.<sup>5</sup> Most patients with prostate cancers are diagnosed at an early stage,<sup>6-7</sup> and many diagnoses are made in asymptomatic men.<sup>8-10</sup>

The main treatment options for localized prostate cancer include radical prostatectomy, external beam radiotherapy and observational management (that is, regular testing of clinical, biochemical or radiological markers or as prompted by occurrence of symptoms).<sup>8</sup> Because some of these treatments are associated with substantial risk of side effects, it is important to try to resolve the current uncertainty about the optimal treatment options.

Some randomized trials have compared the efficacy and safety of two or three treatments. For example, the SPCG-4 trial in Europe and the PIVOT study in the US compared radical prostatectomy with observational management.<sup>11-12</sup> The UK Prostate Testing for Cancer and Treatment ( ProtecT) trial is evaluating treatment effectiveness of active monitoring, radical prostatectomy and external beam radiotherapy for clinically localized prostate cancer in men aged 50-69 years identified through population-based PSA testing.<sup>13</sup> The recruitment phase for the ProtecT trial, which began in 1999, has been completed, but outcomes will not be available until a minimum follow-up period has been accrued.

1  
2  
3 It is unlikely that any single trial will compare all available treatment options. We  
4 therefore performed a network meta-analysis based on a systematic review of  
5 completed randomized trials comparing different interventions for patients with  
6 localized prostate cancer. The network meta-analysis allowed us to integrate  
7 evidence from both direct comparisons (treatments compared head-to-head within a  
8 randomized trial) and indirect comparisons (treatments compared by combining the  
9 results of randomized trials with common comparators).<sup>14-16</sup> Our objective was to  
10 apply the established methodology used in network meta-analysis to an area of  
11 clinical practice where no such previous studies existed. In doing so, our aims were  
12 to summarise existing evidence; 'map out' current gaps in comparative evidence to  
13 help motivate the design and conduct of future comparative studies; and develop an  
14 approach 'primed' for subsequent updating and incorporation of future trial evidence.  
15  
16  
17  
18  
19  
20  
21  
22  
23  
24  
25  
26  
27  
28  
29  
30  
31  
32  
33  
34  
35  
36  
37  
38  
39  
40  
41  
42  
43  
44  
45  
46  
47  
48  
49  
50  
51  
52  
53  
54  
55  
56  
57  
58  
59  
60

## METHODS

### Eligibility criteria

We sought completed randomized trials in men with localized prostate cancer that had compared two or more of the following interventions (as primary treatment, with or without the same adjuvant therapy in all arms): prostatectomy; radiotherapy including brachytherapy; cryotherapy; high-intensity focused ultrasound (HIFU) and observational management. Observational management is characterized by testing of clinical, biochemical or radiological markers of disease progression at regular intervals (typically every 6 months) or as prompted by the occurrence of new symptoms, possibly leading to either radical or palliative treatment. We opted to use the term 'observational management' in preference to active surveillance or active monitoring because the latter terms typically aim to keep men in a window of curability so that only those who require it undergo radical treatment.

Eligible trials had to have reported any of the following efficacy and safety outcomes: all-cause mortality, prostate cancer mortality and gastrointestinal or genitourinary toxicity. Studies comparing treatment combinations or sequences (e.g. per protocol management by surgery with subsequent radiotherapy) were excluded.

### Identification of studies

We adopted the search strategy of a systematic review that supported the development of clinical guidelines on the diagnosis and treatment of prostate cancer by the UK's National Institute for Health and Clinical Excellence (NICE) in 2008.<sup>8</sup>

Studies had been identified by searching Medline (in 2006) and scanning reference list of papers. We retrieved all relevant randomized trials identified in the NICE guideline and implemented the same search strategies to update the collection of trials. We restricted the search to the period from January 2005 to September 2012.

1  
2  
3 No language limits were placed on the searches (see Appendix 1 for full search  
4 strategies).  
5  
6  
7

### 8 9 **Data extraction**

10  
11 Two reviewers (TX and RT) independently screened all the titles and abstracts of the  
12 studies retrieved by the searches for potentially eligible trials, and then independently  
13 assessed the full articles of these trials to confirm whether they met the eligibility  
14 criteria. The results were checked and discussed by TX and RT to agree upon a final  
15 list of included studies. Using a structured and piloted data collection form, all  
16 relevant data in each included paper were extracted by two reviewers independently  
17 (TX and RT/YW). The data extracted were cross-checked and unresolved  
18 discrepancies were referred to a third reviewer; where necessary, problems were  
19 discussed in a panel meeting (TX, RT, YW, JH and GL) whilst DN acted as a clinical  
20 expert advisor.  
21  
22  
23  
24  
25  
26  
27  
28  
29  
30  
31

32  
33 For each included study, we extracted characteristics of participants and  
34 interventions, outcomes reported and collected, sample size (randomized and  
35 analysed) in each arm, numerical results, losses to follow-up and details of patients  
36 excluded from the analyses.<sup>17</sup> To inform the appropriateness of including studies in  
37 the meta-analysis and facilitate assessment of the strength of the evidence we  
38 assessed the risk of bias in each included study using The Cochrane Collaboration's  
39 Risk of Bias tool.<sup>18</sup> Two reviewers (TX and either RT or YW) completed this  
40 independently and agreed on final assessments. The tool assesses risk of bias  
41 arising from inadequacies in processes of generation of the random allocation  
42 sequence, concealment of the allocation sequence and blinding, and from incomplete  
43 outcome data and selective outcome reporting.  
44  
45  
46  
47  
48  
49  
50  
51  
52  
53  
54  
55  
56  
57  
58  
59  
60

## Outcomes

We analysed all-cause mortality and cancer-related mortality at 5 years, late gastrointestinal and late genitourinary toxicity at 3 years. The choice of these follow-up times was pragmatic, as they were the ones most frequently reported in the included trials. Once these time points had been chosen, we extracted the outcome data from the time nearest to these targeted measurement times. Late gastrointestinal and late genitourinary toxicity were defined as scores  $\geq 2$  measured by the Radiation Therapy Oncology Group (RTOG) questionnaire scale by 3 years follow-up.<sup>19</sup> We have not encompassed biochemical or clinical failure as operational definitions of either of those outcomes tend to be specific to different radical treatment modalities.<sup>20</sup>

## Statistical analyses

Initially, we compared each pair of treatments using direct evidence alone, for each outcome. Separate meta-analyses were performed for each pair-wise comparison of interventions: a random-effects model was fitted within each comparison,<sup>21</sup> with a common between-study heterogeneity variance assumed across comparisons to allow for heterogeneity even when only a single study was available. Results are reported as odds ratios with 95% confidence intervals, for every comparison evaluated directly in one or more studies.

Next, we fitted a network meta-analysis model for each outcome separately,<sup>22</sup> combining direct evidence for each comparison (e.g. from studies comparing interventions A with B) with indirect evidence (e.g. from studies comparing A with C and studies comparing B with C), for all pair-wise comparisons simultaneously. The model accounts explicitly for the binary nature of each outcome using a binomial likelihood function; allows for heterogeneity of treatment effects between trials of the

1  
2  
3 same comparison (assuming the same amount of heterogeneity for each comparison,  
4  
5 irrespective of how many trials address it); and enforces an underlying relationship  
6  
7 between direct and indirect evidence for a particular comparison, assuming these are  
8  
9 consistent between the two sources. For each 'loop' of treatment comparisons from  
10  
11 three or more independent sources and for each outcome, we computed the  
12  
13 difference between estimates from direct and indirect evidence on the log odds ratio  
14  
15 scale.<sup>100</sup> This provides a measure of inconsistency between the different sources. We  
16  
17 did not implement more sophisticated methods for testing or adjusting for  
18  
19 inconsistency, due to the small number of loops in the network.  
20

21  
22  
23 Results are reported as odds ratios with 95% credible intervals, for all pair-wise  
24  
25 comparisons of interventions. All analyses were performed within a Bayesian  
26  
27 framework, using Markov chain Monte Carlo methods in WinBUGS (MRC  
28  
29 Biostatistics Unit, Cambridge, UK).<sup>23</sup> Informative prior distributions were used for the  
30  
31 heterogeneity variance, from a published set of distributions for heterogeneity  
32  
33 expected in meta-analyses examining particular intervention and outcome types,<sup>24</sup>  
34  
35 since heterogeneity is imprecisely estimated when the number of studies is small.  
36  
37 For all-cause mortality, a log-normal (-3.93, 1.51<sup>2</sup>) distribution was used. For  
38  
39 gastrointestinal and genitourinary toxicity, a log-normal (-2.01, 1.64<sup>2</sup>) distribution was  
40  
41 used. For cancer-related mortality, a log-normal (-2.89, 1.91<sup>2</sup>) distribution was used.  
42  
43 Vague N (0, 10<sup>4</sup>) priors were used for all other model parameters. Results were  
44  
45 based on 100,000 iterations, following a burn-in of 20,000 iterations.  
46  
47  
48

49  
50 For each outcome, we estimated the probability that each intervention is superior to  
51  
52 all others, the second best, the third best and so on, from the rank orderings of the  
53  
54 treatments at each iteration of the Markov chain. These ranking probabilities were  
55  
56 used to calculate a summary numerical value: the SUCRA (surface under the  
57  
58 cumulative ranking curve).<sup>25</sup> SUCRA values are expressed as percentages; if an  
59  
60

1  
2  
3 intervention is certainly the best, its SUCRA value would be 100%, and if an  
4  
5 intervention is certainly the worst, its SUCRA value would be 0%. If all interventions  
6  
7 are equivalent, we would expect all SUCRA values to be near 50%. We also report  
8  
9 the median ranks and 95% credible intervals for each intervention.  
10  
11  
12  
13  
14  
15  
16  
17  
18  
19  
20  
21  
22  
23  
24  
25  
26  
27  
28  
29  
30  
31  
32  
33  
34  
35  
36  
37  
38  
39  
40  
41  
42  
43  
44  
45  
46  
47  
48  
49  
50  
51  
52  
53  
54  
55  
56  
57  
58  
59  
60

For peer review only

## RESULTS

### Included studies and interventions

The NICE systematic review<sup>8</sup> had identified 20 reports relating to 14 randomized trials.<sup>26-45</sup> Our updated searches retrieved 1,740 studies and identified 39 reports of relevant randomized trials, of which 30 had not been included in the NICE review (Figure 1).<sup>46-75</sup> One of these reports was the sole report of a trial providing data only on acute toxicity,<sup>40</sup> one paper reported only clinical failure,<sup>38</sup> and one paper reported biochemical failure, biochemical disease-free survival and quality of life;<sup>56</sup> these 3 studies were then excluded since they did not report the outcomes of interest to us.

In addition to the remaining 47 full papers from peer-reviewed journals, we identified and included in the analysis data from a conference abstract, describing a randomized trial comparing external beam radiotherapy versus watchful waiting,<sup>76</sup> and reporting data on long term mortality not previously reported in full-text related publications.<sup>77-78</sup>

Our searches also identified 16 relevant systematic reviews.<sup>79-94</sup> We scrutinized the reference lists of all these as well as any further systematic reviews identified by the NICE review, and found no further relevant randomized trials.

The 48 identified reports described 21 randomized trials comparing the effectiveness of different treatments for localized prostate cancer.<sup>26-37, 39, 41-55, 57-76</sup> Seventeen trials reported all-cause mortality, 16 trials reported cancer-related mortality, 16 trials reported gastrointestinal (GI) toxicity, 15 trials reported genitourinary (GU) toxicity.

The characteristics of included studies are summarized in Appendix 2.

The risk of bias assessments for the included trials are illustrated in Figure 2. Most of the evidence was of moderate to good quality. About half of the studies did not report



1  
2  
3 adequate information about allocation sequence generation and allocation sequence  
4 concealment. Unblinded designs were used in all trials included; we judged this  
5 unlikely to cause bias for objectively-measured outcomes such as mortality, but  
6 generate bias in the reporting and assessment of patient-reported toxicity outcomes.  
7  
8 The small number of studies precluded the investigation of potential reporting biases  
9 across studies (for example using funnel plots). Our searches were appropriate, but  
10 the possibility of publication bias cannot be excluded. It is unclear, however, whether  
11 reporting biases would tend to favour any particular treatment (see Appendix 3 for  
12 details of bias assessments for included trials).  
13  
14  
15  
16  
17  
18  
19  
20  
21  
22

23 We categorized the interventions into the following eight categories: observational  
24 management; prostatectomy; conventional radiotherapy (refers to two dimensional  
25 external beam radiation therapy); conventional radiotherapy- hypofractionated (refers  
26 to less than 20 fractions); conformal low dose (LD) radiotherapy (refers to less than  
27 68 Gy); conformal high dose (HD) radiotherapy (refers to more than 74 Gy);  
28 conformal LD radiotherapy-hypofractionated; and cryotherapy. Twenty trials had two  
29 intervention arms. One trial compared three interventions,<sup>54</sup> since two of the three  
30 interventions were very similar and both met our definition of conformal LD  
31 radiotherapy-hypofractionated, we combined the data from these two arms and  
32 regarded the trial as a two-treatment comparison (conformal LD radiotherapy-  
33 hypofractionated versus conformal HD radiotherapy). None of the reviewed studied  
34 assessed brachytherapy and HIFU. Figure 3 illustrates the full network of  
35 comparisons. There were two closed loops of comparisons, one connecting  
36 prostatectomy, observational management and radiotherapy modalities; and the  
37 other connecting different radiotherapy modalities.<sup>100</sup> No inconsistency was detected  
38 in our estimates of the difference between direct and indirect evidence; however,  
39 precision was very low. Cryotherapy only had a single link to the network.  
40  
41  
42  
43  
44  
45  
46  
47  
48  
49  
50  
51  
52  
53  
54  
55  
56  
57  
58  
59  
60

### All-cause mortality

All-cause mortality was reported in 17 trials, covering all the eight interventions of interest. There is no evidence of superiority of any treatment for all-cause mortality. For each pairwise comparison of interventions, the 95% intervals for odds ratios were wide and included 1. The lower-left triangle of results in Table 1 presents odds ratios estimated from direct evidence alone, while the upper-right triangle of results presents odds ratios estimated from the network meta-analysis. The intervals are slightly narrower when based on indirect as well as direct evidence rather than direct evidence alone. The SUCRA values presented in Table 2 summarize the ranking information for all interventions. With respect to all-cause mortality, the highest SUCRA values are 69% for conformal LD radiotehrapy-hypofractionated and 63% for conformal HD radiotherapy, indicating that these are most likely to be among the best treatments for this outcome. However, there is very high uncertainty in the rankings of the interventions, as indicated by wide 95% credible intervals.

### Cancer-related mortality

Cancer-related mortality was reported in 16 trials, covering eight of the interventions. This was a rare outcome in most treatment groups, as expected for patients with localized prostate cancer with a 5 year end point. Odds ratio estimates had wide 95% credible intervals, particularly in comparisons for which only indirect evidence was available, and there was no evidence of superiority for any of the comparator treatments (Table 3). Based on direct comparisons alone, conformal HD radiotherapy was superior to conventional radiotherapy [odds ratio 0.21 (95% interval 0.03, 0.97)] and prostatectomy was superior to observational management [odds ratio 0.60 (95% interval 0.37, 0.98)].

### Gastrointestinal and genitourinary toxicity

Late gastrointestinal toxicity was reported in 16 trials and late genitourinary toxicity was reported in 15 trials. There was evidence that cryotherapy resulted in fewer adverse gastrointestinal events than radiotherapy treatments (estimated odds ratios comparing cryotherapy against the five radiotherapy options ranged from 0.12 to 0.24, whilst all but one of the respective 95% credible intervals excluded 1). The SUCRA value of 99% for cryotherapy and the median rank of 1 (95% interval 1, 2) suggest that cryotherapy is almost certainly superior among the six treatments included in the network meta-analysis in relation to adverse gastrointestinal events (Table 2 and 4). There was also evidence that gastrointestinal toxicity was more likely with conformal HD radiotherapy than with conformal LD radiotherapy. Interpretation of such findings for toxicity should be more cautious than for the other outcomes, due to a concern that lack of blinding could have led to a risk of detection bias. For genitourinary toxicity, there was no evidence favouring one intervention over another (Table 5), although cryotherapy tended to receive better rankings than the five radiotherapy treatments (Table 2), and the odds ratio estimates favour cryotherapy, but the 95% intervals all included 1.

**Table 1.** All-cause mortality: odds ratios (posterior mean with 95% intervals) for each pair-wise comparison of interventions, based on direct evidence alone (lower-left triangle) or direct and indirect evidence (upper-right triangle).

| Intervention                               | Observational management      | Prostatectomy                 | Conventional radiotherapy     | Conventional radiotherapy-hypofractionated | Conformal LD radiotherapy     | Conformal HD radiotherapy     | Conformal LD radiotherapy-hypofractionated | Cryotherapy      |
|--------------------------------------------|-------------------------------|-------------------------------|-------------------------------|--------------------------------------------|-------------------------------|-------------------------------|--------------------------------------------|------------------|
| Observational management                   |                               | 0.79 (0.61,1.02)              | 0.84 (0.48,1.57)              | 0.72 (0.37,1.49)                           | 0.73 (0.44,1.26)              | 0.70 (0.40,1.28)              | 0.53 (0.10,2.88)                           | 0.76 (0.28,1.98) |
| Prostatectomy                              | <sup>3</sup> 0.80 (0.61,1.06) |                               | 1.06 (0.60,2.02)              | 0.91 (0.46,1.90)                           | 0.92 (0.54,1.64)              | 0.88 (0.49,1.66)              | 0.67 (0.12,3.65)                           | 0.96 (0.36,2.56) |
| Conventional radiotherapy                  | -                             | <sup>1</sup> 1.34 (0.55,3.24) |                               | 0.85 (0.59,1.24)                           | 0.86 (0.55,1.35)              | 0.82 (0.51,1.35)              | 0.62 (0.11,3.21)                           | 0.90 (0.41,1.89) |
| Conventional radiotherapy-hypofractionated | -                             | -                             | <sup>2</sup> 0.85 (0.59,1.24) |                                            | 1.01 (0.56,1.80)              | 0.97 (0.53,1.78)              | 0.73 (0.13,3.86)                           | 1.05 (0.44,2.42) |
| Conformal LD radiotherapy                  | <sup>1</sup> 0.66 (0.35,1.21) | -                             | <sup>1</sup> 0.92 (0.50,1.72) | -                                          |                               | 0.96 (0.72,1.29)              | 0.72 (0.14,3.51)                           | 1.04 (0.42,2.49) |
| Conformal HD radiotherapy                  | -                             | -                             | <sup>1</sup> 0.87 (0.39,1.92) | -                                          | <sup>4</sup> 0.95 (0.70,1.31) |                               | 0.74 (0.14,3.61)                           | 1.09 (0.43,2.64) |
| Conformal LD radiotherapy-hypofractionated | -                             | -                             | -                             | -                                          | -                             | <sup>2</sup> 0.78 (0.13,4.25) |                                            | 1.47 (0.22,9.40) |
| Cryotherapy                                | -                             | -                             | <sup>2</sup> 0.90 (0.41,2.02) | -                                          | -                             | -                             | -                                          |                  |

LD: low dose; HD: high dose.

Lower-left results compare row-defining interventions against column-defining interventions. Upper-right results compare column-defining interventions against row-defining interventions.

In the meta-analysis of direct comparisons (reported in lower-left triangle), between-trial heterogeneity  $\tau^2$  was estimated as 0.009 (95% interval 0.001 to 0.08).

In the network meta-analysis (reported in upper-right triangle), between-trial heterogeneity  $\tau^2$  was estimated as 0.009 (95% interval 0.001 to 0.07).

The small superscript numbers in the cells of lower-left triangle indicate the numbers of randomized trials which compared the two interventions directly.

**Table 2.** Ranking of interventions with respect to all-cause and cancer-related mortality, adverse gastrointestinal and genitourinary events: SUCRA (Surface Under the Cumulative RAnking curve) values and median ranks (with 95% intervals).†

| Intervention                               | All-cause mortality |                            | Cancer-related mortality |                            | Adverse gastrointestinal events |                            | Adverse genitourinary events |                            |
|--------------------------------------------|---------------------|----------------------------|--------------------------|----------------------------|---------------------------------|----------------------------|------------------------------|----------------------------|
|                                            | SUCRA value         | Median rank (95% interval) | SUCRA value              | Median rank (95% interval) | SUCRA value                     | Median rank (95% interval) | SUCRA value                  | Median rank (95% interval) |
| Observational management                   | 18%                 | 7 (2, 8)                   | 30%                      | 6 (3, 8)                   | -                               | -                          | -                            | -                          |
| Prostatectomy                              | 49%                 | 5 (1, 7)                   | 64%                      | 4 (1, 7)                   | -                               | -                          | -                            | -                          |
| Conventional radiotherapy                  | 35%                 | 6 (2, 8)                   | 16%                      | 7 (4, 8)                   | 43%                             | 4 (2, 6)                   | 51%                          | 3 (1, 6)                   |
| Conventional radiotherapy-hypofractionated | 58%                 | 4 (1, 8)                   | 44%                      | 5 (1, 8)                   | 42%                             | 4 (1, 6)                   | 50%                          | 3 (1, 6)                   |
| Conformal LD radiotherapy                  | 57%                 | 4 (1, 7)                   | 61%                      | 4 (2, 7)                   | 67%                             | 2 (2, 4)                   | 66%                          | 3 (1, 5)                   |
| Conformal HD radiotherapy                  | 63%                 | 3 (1, 7)                   | 75%                      | 2 (1, 6)                   | 19%                             | 5 (3, 6)                   | 30%                          | 5 (2, 6)                   |
| Conformal LD radiotherapy-hypofractionated | 69%                 | 1 (1, 8)                   | 85%                      | 1 (1, 8)                   | 30%                             | 5 (2, 6)                   | 26%                          | 5 (1, 6)                   |
| Cryotherapy                                | 50%                 | 4 (1, 8)                   | 24%                      | 7 (2, 8)                   | 99%                             | 1 (1, 2)                   | 77%                          | 1 (1, 6)                   |

† The surface under the cumulative ranking curve (SUCRA) value is a numerical summary of the estimated probabilities that each treatment is the best, second best, third best (and so on) for that particular outcome. Higher values indicate higher rankings compared with other treatments. For example, for cryotherapy, the high SUCRA value of 99% and median rank of 1 for adverse gastrointestinal events shows that cryotherapy is expected to be superior with respect to this outcome.

LD: low dose; HD: high dose.

**Table 3.** Prostate cancer-caused mortality: odds ratios (posterior mean with 95% intervals) for each pair-wise comparison of interventions, based on direct evidence alone (lower-left triangle) or direct and indirect evidence (upper-right triangle).

| Intervention                               | Observational management      | Prostatectomy                 | Conventional radiotherapy     | Conventional radiotherapy-hypofractionated | Conformal LD radiotherapy     | Conformal HD radiotherapy      | Conformal LD radiotherapy-hypofractionated | Cryotherapy      |
|--------------------------------------------|-------------------------------|-------------------------------|-------------------------------|--------------------------------------------|-------------------------------|--------------------------------|--------------------------------------------|------------------|
| Observational management                   |                               | 0.63 (0.40,1.02)              | 1.39 (0.49,4.16)              | 0.90 (0.24,3.42)                           | 0.63 (0.29,1.31)              | 0.52 (0.22,1.19)               | 0.13 (0.00*,3.59)                          | 1.37 (0.28,6.89) |
| Prostatectomy                              | <sup>2</sup> 0.60 (0.37,0.98) |                               | 2.20 (0.82,6.37)              | 1.42 (0.39,5.19)                           | 0.99 (0.42,2.26)              | 0.83 (0.32,2.00)               | 0.20 (0.00*,6.07)                          | 2.16 (0.46,10.9) |
| Conventional radiotherapy                  | -                             | <sup>1</sup> 1.65 (0.53,5.44) |                               | 0.64 (0.29,1.41)                           | 0.45 (0.14,1.30)              | 0.38 (0.12,1.06)               | 0.09 (0.00*,3.08)                          | 0.98 (0.28,3.35) |
| Conventional radiotherapy-hypofractionated | -                             | -                             | <sup>2</sup> 0.65 (0.28,1.43) |                                            | 0.70 (0.18,2.65)              | 0.59 (0.15,2.16)               | 0.14 (0.00*,5.08)                          | 1.51 (0.36,6.54) |
| Conformal LD radiotherapy                  | <sup>1</sup> 0.70 (0.31,1.57) | -                             | -                             | -                                          |                               | 0.84 (0.52,1.30)               | 0.20 (0.00*,5.73)                          | 2.20 (0.44,11.4) |
| Conformal HD radiotherapy                  | -                             | -                             | <sup>1</sup> 0.21 (0.03,0.97) | -                                          | <sup>5</sup> 0.86 (0.53,1.37) |                                | 0.25 (0.00*,6.79)                          | 2.61 (0.53,14.1) |
| Conformal LD radiotherapy-hypofractionated | -                             | -                             | -                             | -                                          | -                             | <sup>2</sup> 0.22 (0.00*,6.85) |                                            | 11.2 (0.24,5542) |
| Cryotherapy                                | -                             | -                             | <sup>2</sup> 0.96 (0.27,3.46) | -                                          | -                             | -                              | -                                          |                  |

LD: low dose; HD: high dose.

\* Odds ratio was less than 0.005.

Lower-left results compare row-defining interventions against column-defining interventions. Upper-right results compare column-defining interventions against row-defining interventions.

In the meta-analysis of direct comparisons (reported in lower-left triangle), between-trial heterogeneity  $\tau^2$  was estimated as 0.02 (95% interval 0.001 to 0.31).

In the network meta-analysis (reported in upper-right triangle), between-trial heterogeneity  $\tau^2$  was estimated as 0.02 (95% interval 0.001 to 0.29).

The small superscript numbers in the cells of lower-left triangle indicate the numbers of randomized trials which compared the two interventions directly.

**Table 4.** Adverse gastrointestinal events: odds ratios (posterior mean with 95% intervals) for each pair-wise comparison of interventions, based on direct evidence alone (lower-left triangle) or direct and indirect evidence (upper-right triangle).

| Intervention                               | Observational management      | Prostatectomy | Conventional radiotherapy     | Conventional radiotherapy-hypofractionated | Conformal LD radiotherapy     | Conformal HD radiotherapy     | Conformal LD radiotherapy-hypofractionated | Cryotherapy      |
|--------------------------------------------|-------------------------------|---------------|-------------------------------|--------------------------------------------|-------------------------------|-------------------------------|--------------------------------------------|------------------|
| Observational management                   |                               | -             | -                             | -                                          | -                             | -                             | -                                          | -                |
| Prostatectomy                              | <sup>2</sup> 0.84 (0.33,1.88) |               | -                             | -                                          | -                             | -                             | -                                          | -                |
| Conventional radiotherapy                  | -                             | -             |                               | 1.01 (0.19,5.29)                           | 0.72 (0.29,1.59)              | 1.42 (0.57,3.39)              | 1.26 (0.35,4.30)                           | 0.17 (0.04,0.51) |
| Conventional radiotherapy-hypofractionated | -                             | -             | <sup>1</sup> 1.00 (0.22,4.56) |                                            | 0.70 (0.11,4.37)              | 1.40 (0.21,9.02)              | 1.24 (0.15,9.76)                           | 0.17 (0.02,1.19) |
| Conformal LD radiotherapy                  | -                             | -             | <sup>2</sup> 0.46 (0.17,1.16) | -                                          |                               | 1.98 (1.18,3.59)              | 1.77 (0.63,5.11)                           | 0.24 (0.05,0.96) |
| Conformal HD radiotherapy                  | -                             | -             | <sup>1</sup> 2.66 (0.85,8.62) | -                                          | <sup>5</sup> 1.73 (1.07,2.97) |                               | 0.89 (0.36,2.15)                           | 0.12 (0.02,0.48) |
| Conformal LD radiotherapy-hypofractionated | -                             | -             | -                             | -                                          | -                             | <sup>3</sup> 0.89 (0.39,1.96) |                                            | 0.14 (0.02,0.70) |
| Cryotherapy                                | -                             | -             | <sup>2</sup> 0.18 (0.05,0.50) | -                                          | -                             | -                             | -                                          |                  |

LD: low dose; HD: high dose.

Lower-left results compare row-defining interventions against column-defining interventions. Upper-right results compare column-defining interventions against row-defining interventions.

The comparison of prostatectomy with observational management was not linked to the rest of the network, so this evidence was included in the meta-analysis of direct comparisons only.

In the meta-analysis of direct comparisons (reported in lower-left triangle), between-trial heterogeneity  $\tau^2$  was estimated as 0.14 (95% interval 0.01 to 0.97). In the network meta-analysis (reported in upper-right triangle), between-trial heterogeneity  $\tau^2$  was estimated as 0.24 (95% interval 0.02 to 1.23).

The small superscript numbers in the cells of lower-left triangle indicate the numbers of randomized trials which compared the two interventions directly.

**Table 5.** Adverse genitourinary events: odds ratios (posterior mean with 95% intervals) for each pair-wise comparison of interventions, based on direct evidence alone (lower-left triangle) or direct and indirect evidence (upper-right triangle).

| Intervention                               | Observational management         | Prostatectomy | Conventional radiotherapy        | Conventional radiotherapy-hypofractionated | Conformal LD radiotherapy        | Conformal HD radiotherapy        | Conformal LD radiotherapy-hypofractionated | Cryotherapy      |
|--------------------------------------------|----------------------------------|---------------|----------------------------------|--------------------------------------------|----------------------------------|----------------------------------|--------------------------------------------|------------------|
| Observational management                   |                                  | -             | -                                | -                                          | -                                | -                                | -                                          | -                |
| Prostatectomy                              | <sup>2</sup> 2.27<br>(1.34,3.90) |               | -                                | -                                          | -                                | -                                | -                                          | -                |
| Conventional radiotherapy                  | -                                | -             |                                  | 1.00 (0.34,2.90)                           | 0.91 (0.54,1.51)                 | 1.19 (0.69,2.11)                 | 1.41 (0.49,4.07)                           | 0.66 (0.22,2.00) |
| Conventional radiotherapy-hypofractionated | -                                | -             | <sup>1</sup> 1.01<br>(0.34,3.00) |                                            | 0.90 (0.27,2.97)                 | 1.19 (0.36,4.04)                 | 1.41 (0.31,6.44)                           | 0.66 (0.14,3.04) |
| Conformal LD radiotherapy                  | -                                | -             | <sup>2</sup> 0.80<br>(0.43,1.51) | -                                          |                                  | 1.32 (0.97,1.86)                 | 1.56 (0.61,4.09)                           | 0.73 (0.21,2.52) |
| Conformal HD radiotherapy                  | -                                | -             | <sup>1</sup> 1.53<br>(0.62,3.82) | -                                          | <sup>5</sup> 1.28<br>(0.93,1.86) |                                  | 1.18 (0.48,2.92)                           | 0.55 (0.16,1.91) |
| Conformal LD radiotherapy-hypofractionated | -                                | -             | -                                | -                                          | -                                | <sup>2</sup> 1.17<br>(0.48,2.91) |                                            | 0.47 (0.10,2.15) |
| Cryotherapy                                | -                                | -             | <sup>2</sup> 0.68<br>(0.22,2.03) | -                                          | -                                | -                                | -                                          |                  |

LD: low dose; HD: high dose.

Lower-left results compare row-defining interventions against column-defining interventions. Upper-right results compare column-defining interventions against row-defining interventions.

The comparison of prostatectomy with observational management was not linked to the rest of the network, so this evidence was included in the meta-analysis of direct comparisons only.

In the meta-analysis of direct comparisons (reported in lower-left triangle), between-trial heterogeneity  $\tau^2$  was estimated as 0.04 (95% interval 0.003 to 0.29). In the network meta-analysis (reported in upper-right triangle), between-trial heterogeneity  $\tau^2$  was estimated as 0.04 (95% interval 0.002 to 0.26).

The small superscript numbers in the cells of lower-left triangle indicate the numbers of randomized trials which compared the two interventions directly.



## DISCUSSION

Using network meta-analysis, we were able to combine simultaneously all relevant evidence on treating patients with localized prostate cancer, even in the absence of direct comparative evidence for some treatment pairs, encompassing four efficacy and safety outcomes. Based on data from 21 trials including 7,350 patients randomly assigned among eight different intervention regimes for localized prostate cancer, we found substantial uncertainty about the relative efficacy and safety of different interventions in respect of the studied outcomes.

Assumptions of consistency between direct and indirect evidence were tested to justify the joint synthesis of all studies; however, these tests had little power due to the relatively small number of trials available in most direct comparisons. Instead we must rely on judgements about the similarity of studies included in the analysis in aspects such as patient groups, outcome measures and study methodology. Although we defined the population of interest as patients with localized prostate cancer, there was heterogeneity between individual study populations in terms of the severity of disease. Some of the trials were conducted several decades ago, when surgery and radiology techniques may have been different, and we observed that stage migration has occurred in men diagnosed with prostate cancer, due to emerging bio-marker and image technologies. Furthermore, some of the trials used adjuvant therapy, although this was applied in all the arms within the trial.

Two further limitations warrant mention. Literature searches were completed in September of 2012. However, the results of one of the most important randomized trials – ProtecT study<sup>13</sup> – has not been published so far, and to our knowledge there are no other new relevant RCTs have been reported after this systematic review. Our choices of measurements may have favoured some treatments over others: for example the RTOG scale had been used to define the late gastrointestinal and late genitourinary toxicity in the included studies, but it

1  
2  
3 does not measure incontinence which could be the most common adverse event post-  
4  
5 prostatectomy.<sup>102</sup>  
6  
7

8  
9 Methodologically, we used informative prior distributions based on external evidence for  
10  
11 heterogeneity variances, to increase precision in their estimation and improve estimation of  
12  
13 treatment differences. Data-based informative priors have previously been considered by Lu  
14  
15 & Ades,<sup>101</sup> who used them for the between-study correlation structure. To our knowledge,  
16  
17 our paper is the first application of network meta-analysis incorporating data-based  
18  
19 informative priors for between-study heterogeneity.  
20  
21

22  
23 Our findings have implications for research funding prioritisation and study design; and for  
24  
25 clinical practice. The study identified particular 'weak links' in the network of comparative  
26  
27 treatment options, which might be prioritized for future investment in randomized controlled  
28  
29 trials. This is particularly the case for studies comparing HIFU (which currently is bereft of  
30  
31 any comparative evidence) or brachytherapy against other treatment options, and also for  
32  
33 trials examining the comparative efficacy and safety of prostatectomy versus conformal  
34  
35 radiotherapy modalities. For clinicians, and for men diagnosed with prostate cancer, our  
36  
37 findings highlight that the optimal treatment options may be different in respect of different  
38  
39 outcomes: patients need to be given appropriate information about the uncertainty  
40  
41 surrounding treatment choice currently, and be allowed to opt for 'trade-offs' between  
42  
43 efficacy and safety outcomes as they judge appropriately.<sup>95</sup> Observational studies have  
44  
45 consistently shown that radical prostatectomy has better cause-specific mortality outcomes  
46  
47 compared with radiotherapy.<sup>96-99,103</sup>  
48  
49

50  
51 In conclusion, clinically important information from high quality randomized trials is still  
52  
53 needed to inform decision making regarding primary treatment options for men with localized  
54  
55 prostate cancer. The findings of this study highlight the importance of informed patient  
56  
57 choice and shared-decision making about treatment modality and acceptable trade-offs  
58  
59  
60

1  
2  
3 between multiple outcomes. The upcoming results of the ProtecT study,<sup>13</sup> which is  
4 evaluating effectiveness of multiple therapies in men with PSA-detected localized prostate  
5 cancer, together with other treatment studies in progress, will hopefully contribute to the  
6 evidence base. It is however unlikely that evidential uncertainty about all relevant and  
7 important outcomes will be resolved by these trials, and an updated network meta-analysis  
8 incorporating new evidence may be useful to synthesize the new with the existing evidence.  
9 We demonstrate a high degree of uncertainty about treatment superiority in the management  
10 of localized prostate cancer. Clinicians and patients need to grapple with this uncertainty in  
11 the context of shared-decision making.  
12  
13  
14  
15  
16  
17  
18  
19  
20  
21  
22  
23  
24  
25  
26  
27  
28  
29  
30  
31  
32  
33  
34  
35  
36  
37  
38  
39  
40  
41  
42  
43  
44  
45  
46  
47  
48  
49  
50  
51  
52  
53  
54  
55  
56  
57  
58  
59  
60

1  
2  
3 **Funding and Financial Disclosure:** TX was funded by the National Institute for Health  
4 Research Health Technology Assessment (NIHR HTA) program (HTA 96/20/99). RT was  
5 supported by Medical Research council grant U105285807. GL was supported by a Post-  
6 Doctoral Fellowship Award of the National Institute for Health Research (PDF-2011-04-047).  
7 The funders had no role in study design, data collection and analysis, decision to publish, or  
8 preparation of the manuscript.  
9  
10  
11

12  
13 **Author Contributions:** TX, RT, GL, and JH conceived and designed the study. TX  
14 performed the literature searches. TX, RT, YW, GL, and JH performed the literature review  
15 and data extraction. TX, RT, YW, GL, and JH analyzed the data. TX wrote the first draft of  
16 the manuscript. TX, RT, YW, DN, GL, and JH contributed to the writing of the manuscript.  
17  
18  
19

20  
21 **Competing Interests:** The authors declare that no competing interests exist.  
22  
23

24 **Data Sharing Statement:** Not additional data  
25  
26  
27  
28  
29  
30  
31  
32  
33  
34  
35  
36  
37  
38  
39  
40  
41  
42  
43  
44  
45  
46  
47  
48  
49  
50  
51  
52  
53  
54  
55  
56  
57  
58  
59  
60

## REFERENCES

1. Jemal A, Bray F, Center MM, et al. Global cancer statistics. *CA Cancer J Clin*. Mar-Apr 2011;61(2):69-90.
2. Ferlay J, Shin HR, Bray F, et al. *GLOBOCAN 2008 v1.2, Cancer Incidence and Mortality Worldwide: IARC CancerBase No.10*. Lyon, France: International Agency for Research on Cancer; 2010. Available from: <http://globocan.iarc.fr>, accessed on 08 Aug 2011.
3. Cancer Research UK. Prostate cancer - UK incidence statistics. <http://info.cancerresearchuk.org/cancerstats/types/prostate/incidence/>. Accessed 08 Aug, 2011.
4. Howlader N, Noone AM, Krapcho M, et al. SEER Cancer Statistics Review, 1975-2008, National Cancer Institute. Bethesda, MD, [http://seer.cancer.gov/csr/1975\\_2008/](http://seer.cancer.gov/csr/1975_2008/), based on November 2010 SEER data submission, posted to the SEER web site. 2011.
5. National Cancer Institute. Prostate Cancer. <http://www.cancer.gov/cancertopics/types/prostate>. Accessed 08 Aug, 2011.
6. National Cancer Institute. Cancer advances in focus - prostate cancer. <http://www.cancer.gov/cancertopics/factsheet/cancer-advances-in-focus/prostate>. Accessed 08 Aug, 2011.
7. Lyratzopoulos G, Barbiere JM, Greenberg DC, et al. Population based time trends and socioeconomic variation in use of radiotherapy and radical surgery for prostate cancer in a UK region: continuous survey. *BMJ*. 2010;340:c1928.
8. *National Collaborating Centre for Cancer. NICE clinical guideline 58. Prostate cancer: diagnosis and treatment. Evidence review*. London: National Institute for Health and Clinical Excellence; 2008.
9. Heidenreich A, Bastian PJ, Bellmunt J, et al. *Guidelines on prostate cancer*: European Association of Urology; 2012.
10. Thompson I, Thrasher JB, Aus G, et al. *Guideline for the Management of Clinically Localized Prostate Cancer: 2007 Update*.: American Urological Association; 2011.
11. Andersson SO, Andren O, Lyth J, et al. Managing localized prostate cancer by radical prostatectomy or watchful waiting: Cost analysis of a randomized trial (SPCG-4). *Scand J Urol Nephrol*. Apr 2011;45(3):177-183.
12. Wilt TJ, Brawer MK, Barry MJ, et al. The Prostate cancer Intervention Versus Observation Trial:VA/NCI/AHRQ Cooperative Studies Program #407 (PIVOT): design and baseline results of a randomized controlled trial comparing radical prostatectomy to watchful waiting for men with clinically localized prostate cancer. *Contemp Clin Trials*. Jan 2009;30(1):81-87.
13. Donovan J, Mills N, Smith M, et al. Quality improvement report: Improving design and conduct of randomised trials by embedding them in qualitative research: ProtecT (prostate testing for cancer and treatment) study. Commentary: presenting unbiased information to patients can be difficult. *BMJ*. Oct 5 2002;325(7367):766-770.

- 1  
2  
3  
4  
5  
6  
7  
8  
9  
10  
11  
12  
13  
14  
15  
16  
17  
18  
19  
20  
21  
22  
23  
24  
25  
26  
27  
28  
29  
30  
31  
32  
33  
34  
35  
36  
37  
38  
39  
40  
41  
42  
43  
44  
45  
46  
47  
48  
49  
50  
51  
52  
53  
54  
55  
56  
57  
58  
59  
60
14. Caldwell DM, Ades AE, Higgins JP. Simultaneous comparison of multiple treatments: combining direct and indirect evidence. *BMJ*. Oct 15 2005;331(7521):897-900.
  15. Lu G, Ades AE. Combination of direct and indirect evidence in mixed treatment comparisons. *Stat Med*. Oct 30 2004;23(20):3105-3124.
  16. Salanti G, Higgins JP, Ades AE, et al. Evaluation of networks of randomized trials. *Stat Methods Med Res*. Jun 2008;17(3):279-301.
  17. Higgins JPT, Green S. *Cochrane Handbook for Systematic Reviews of Interventions Version 5.1.0 [updated March 2011]*. The Cochrane Collaboration. Available from [www.cochrane-handbook.org](http://www.cochrane-handbook.org); 2011.
  18. Higgins JP, Altman DG, Gotzsche PC, Juni P, Moher D, Oxman AD, Savovic J, Schulz KF, Weeks L, Sterne JA. The Cochrane Collaboration's tool for assessing risk of bias in randomised trials. *BMJ*. 2011;343:d5928.
  19. Pilepich MV, Krall JM, Sause WT, et al. Correlation of radiotherapeutic parameters and treatment related morbidity in carcinoma of the prostate--analysis of RTOG study 75-06. *Int J Radiat Oncol Biol Phys*. Mar 1987;13(3):351-357.
  20. Nielsen ME, Makarov DV, Humphreys E, et al. Is it possible to compare PSA recurrence-free survival after surgery and radiotherapy using revised ASTRO criterion--"nadir + 2"? *Urology*. Aug 2008;72(2):389-393; discussion 394-385.
  21. Smith TC, Spiegelhalter DJ, Thomas A. Bayesian approaches to random-effects meta-analysis: a comparative study. *Stat Med*. Dec 30 1995;14(24):2685-2699.
  22. Dias S, Welton NJ, Sutton AJ, et al. NICE DSU Technical Support Document 2: A Generalised Linear Modelling Framework for Pairwise and Network Meta-Analysis of Randomised Controlled Trials. 2011; <http://www.nicedsu.org.uk>. Accessed April, 2012.
  23. Lunn DJ, Thomas A, Best N, et al. WinBUGS - A Bayesian modelling framework: Concepts, structure, and extensibility. *Stat Comput*. Oct 2000;10(4):325-337.
  24. Turner RM, Davey J, Clarke MJ, et al. Predicting the extent of heterogeneity in meta-analysis, using empirical data from the Cochrane Database of Systematic Reviews. *International Journal of Epidemiology*. in press.
  25. Salanti G, Ades AE, Ioannidis JP. Graphical methods and numerical summaries for presenting results from multiple-treatment meta-analysis: an overview and tutorial. *J Clin Epidemiol*. Feb 2011;64(2):163-171.
  26. Akakura K, Suzuki H, Ichikawa T, et al. A randomized trial comparing radical prostatectomy plus endocrine therapy versus external beam radiotherapy plus endocrine therapy for locally advanced prostate cancer: results at median follow-up of 102 months. *Jpn J Clin Oncol*. Dec 2006;36(12):789-793.
  27. Bill-Axelson A, Holmberg L, Ruutu M, et al. Radical prostatectomy versus watchful waiting in early prostate cancer. *N Engl J Med*. May 12 2005;352(19):1977-1984.
  28. Chin JL, Ng CK, Touma NJ, et al. Randomized trial comparing cryoablation and external beam radiotherapy for T2C-T3B prostate cancer. *Prostate Cancer Prostatic Dis*. 2008;11(1):40-45.

- 1  
2  
3 29. Dearnaley DP, Hall E, Lawrence D, et al. Phase III pilot study of dose escalation  
4 using conformal radiotherapy in prostate cancer: PSA control and side effects. *Br J*  
5 *Cancer*. Feb 14 2005;92(3):488-498.  
6  
7 30. Dearnaley DP, Khoo VS, Norman AR, et al. Comparison of radiation side-effects of  
8 conformal and conventional radiotherapy in prostate cancer: a randomised trial.  
9 *Lancet*. Jan 23 1999;353(9149):267-272.  
10  
11 31. Dearnaley DP, Sydes MR, Graham JD, et al. Escalated-dose versus standard-dose  
12 conformal radiotherapy in prostate cancer: first results from the MRC RT01  
13 randomised controlled trial. *Lancet Oncol*. Jun 2007;8(6):475-487.  
14  
15 32. Dearnaley DP, Sydes MR, Langley RE, et al. The early toxicity of escalated versus  
16 standard dose conformal radiotherapy with neo-adjuvant androgen suppression for  
17 patients with localised prostate cancer: results from the MRC RT01 trial  
18 (ISRCTN47772397). *Radiother Oncol*. Apr 2007;83(1):31-41.  
19  
20 33. Donnelly B, Saliken J, Brasher P, et al. Randomized Trial of External Beam  
21 Radiotherapy Versus Cryoablation in Patients with Localized Prostate Cancer. The  
22 American Urological Association Annual Meeting. Abstract 1141. 2007.  
23  
24 34. Graverson PH, Nielsen KT, Gasser TC, et al. Radical prostatectomy versus  
25 expectant primary treatment in stages I and II prostatic cancer. A fifteen-year follow-  
26 up. *Urology*. Dec 1990;36(6):493-498.  
27  
28 35. Koper PC, Jansen P, van Putten W, et al. Gastro-intestinal and genito-urinary  
29 morbidity after 3D conformal radiotherapy of prostate cancer: observations of a  
30 randomized trial. *Radiother Oncol*. Oct 2004;73(1):1-9.  
31  
32 36. Koper PC, Stroom JC, van Putten WL, et al. Acute morbidity reduction using 3DCRT  
33 for prostate carcinoma: a randomized study. *Int J Radiat Oncol Biol Phys*. Mar 1  
34 1999;43(4):727-734.  
35  
36 37. Lukka H, Hayter C, Julian JA, et al. Randomized trial comparing two fractionation  
37 schedules for patients with localized prostate cancer. *J Clin Oncol*. Sep 1  
38 2005;23(25):6132-6138.  
39  
40 38. Paulson DF, Lin GH, Hinshaw W, et al. Radical surgery versus radiotherapy for  
41 adenocarcinoma of the prostate. *J Urol*. Sep 1982;128(3):502-504.  
42  
43 39. Peeters ST, Heemsbergen WD, Koper PC, et al. Dose-response in radiotherapy for  
44 localized prostate cancer: results of the Dutch multicenter randomized phase III trial  
45 comparing 68 Gy of radiotherapy with 78 Gy. *J Clin Oncol*. May 1 2006;24(13):1990-  
46 1996.  
47  
48 40. Pollack A, Hanlon AL, Horwitz EM, et al. Dosimetry and preliminary acute toxicity in  
49 the first 100 men treated for prostate cancer on a randomized hypofractionation dose  
50 escalation trial. *Int J Radiat Oncol Biol Phys*. Feb 1 2006;64(2):518-526.  
51  
52 41. Pollack A, Zagars GK, Starkschall G, et al. Prostate cancer radiation dose response:  
53 results of the M. D. Anderson phase III randomized trial. *Int J Radiat Oncol Biol Phys*.  
54 Aug 1 2002;53(5):1097-1105.  
55  
56 42. Steineck G, Helgesen F, Adolfsson J, et al. Quality of life after radical prostatectomy  
57 or watchful waiting. *N Engl J Med*. Sep 12 2002;347(11):790-796.  
58  
59  
60



- 1  
2  
3 **43.** Storey MR, Pollack A, Zagars G, et al. Complications from radiotherapy dose  
4 escalation in prostate cancer: preliminary results of a randomized trial. *Int J Radiat*  
5 *Oncol Biol Phys*. Oct 1 2000;48(3):635-642.  
6
- 7 **44.** Tait DM, Nahum AE, Meyer LC et al. Acute toxicity in pelvic radiotherapy; a  
8 randomised trial of conformal versus conventional treatment. *Radiother Oncol*. Feb  
9 1997;42(2):121-136.  
10
- 11 **45.** Yeoh EE, Fraser RJ, McGowan RE, et al. Evidence for efficacy without increased  
12 toxicity of hypofractionated radiotherapy for prostate carcinoma: early results of a  
13 Phase III randomized trial. *Int J Radiat Oncol Biol Phys*. Mar 15 2003;55(4):943-955.  
14
- 15 **46.** Al-Mamgani A, van Putten WL, Heemsbergen WD, et al. Update of Dutch multicenter  
16 dose-escalation trial of radiotherapy for localized prostate cancer. *Int J Radiat Oncol*  
17 *Biol Phys*. Nov 15 2008;72(4):980-988.  
18
- 19 **47.** Al-Mamgani A, van Putten WL, van der Wielen GJ, et al. Dose escalation and quality  
20 of life in patients with localized prostate cancer treated with radiotherapy: long-term  
21 results of the Dutch randomized dose-escalation trial (CKTO 96-10 trial). *Int J Radiat*  
22 *Oncol Biol Phys*. Mar 15 2011;79(4):1004-1012.  
23
- 24 **48.** Arcangeli G, Fowler J, Gomellini S, et al. Acute and late toxicity in a randomized trial  
25 of conventional versus hypofractionated three-dimensional conformal radiotherapy  
26 for prostate cancer. *Int J Radiat Oncol Biol Phys*. Mar 15 2011;79(4):1013-1021.  
27
- 28 **49.** Arcangeli G, Saracino B, Gomellini S, et al. A prospective phase III randomized trial  
29 of hypofractionation versus conventional fractionation in patients with high-risk  
30 prostate cancer. *Int J Radiat Oncol Biol Phys*. Sep 1 2010;78(1):11-18.  
31
- 32 **50.** Beckendorf V, Guerif S, Le Prise E, et al. 70 Gy versus 80 Gy in localized prostate  
33 cancer: 5-year results of GETUG 06 randomized trial. *Int J Radiat Oncol Biol Phys*.  
34 Jul 15 2011;80(4):1056-1063.  
35
- 36 **51.** Beckendorf V, Guerif S, Le Prise E, et al. The GETUG 70 Gy vs. 80 Gy randomized  
37 trial for localized prostate cancer: feasibility and acute toxicity. *Int J Radiat Oncol Biol*  
38 *Phys*. Nov 15 2004;60(4):1056-1065.  
39
- 40 **52.** Bill-Axelson A, Holmberg L, Filen F, et al. Radical prostatectomy versus watchful  
41 waiting in localized prostate cancer: the Scandinavian prostate cancer group-4  
42 randomized trial. *J Natl Cancer Inst*. Aug 20 2008;100(16):1144-1154.  
43
- 44 **53.** Bill-Axelson A, Holmberg L, Ruutu M, et al. Radical prostatectomy versus watchful  
45 waiting in early prostate cancer. *N Engl J Med*. May 5 2011;364(18):1708-1717.  
46
- 47 **54.** Dearnaley D, Syndikus I, Sumo G, et al. Conventional versus hypofractionated high-  
48 dose intensity-modulated radiotherapy for prostate cancer: preliminary safety results  
49 from the CHHiP randomised controlled trial. *Lancet Oncol*. Jan 2012;13(1):43-54.  
50
- 51 **55.** Donnelly BJ, Saliken JC, Brasher PM, et al. A randomized trial of external beam  
52 radiotherapy versus cryoablation in patients with localized prostate cancer. *Cancer*.  
53 Jan 15 2010;116(2):323-330.  
54
- 55 **56.** Giberti C, Chiono L, Gallo F, et al. Radical retropubic prostatectomy versus  
56 brachytherapy for low-risk prostatic cancer: a prospective study. *World J Urol*. Oct  
57 2009;27(5):607-612.  
58  
59  
60



- 1  
2  
3 **57.** Heemsbergen WD, Hoogeman MS, Witte MG, et al. Increased risk of biochemical  
4 and clinical failure for prostate patients with a large rectum at radiotherapy planning:  
5 results from the Dutch trial of 68 Gy versus 78 Gy. *Int J Radiat Oncol Biol Phys.* Apr  
6 1 2007;67(5):1418-1424.  
7
- 8 **58.** Johansson E, Bill-Axelsson A, Holmberg L, et al. Time, symptom burden, androgen  
9 deprivation, and self-assessed quality of life after radical prostatectomy or watchful  
10 waiting: the Randomized Scandinavian Prostate Cancer Group Study Number 4  
11 (SPCG-4) clinical trial. *Eur Urol.* Feb 2009;55(2):422-430.  
12
- 13 **59.** Johansson E, Steineck G, Holmberg L, et al. Long-term quality-of-life outcomes after  
14 radical prostatectomy or watchful waiting: the Scandinavian Prostate Cancer Group-4  
15 randomised trial. *Lancet Oncol.* Sep 2011;12(9):891-899.  
16
- 17 **60.** Kuban DA, Levy LB, Cheung MR, et al. Long-term failure patterns and survival in a  
18 randomized dose-escalation trial for prostate cancer. Who dies of disease? *Int J*  
19 *Radiat Oncol Biol Phys.* Apr 1 2011;79(5):1310-1317.  
20
- 21 **61.** Kuban DA, Tucker SL, Dong L, et al. Long-term results of the M. D. Anderson  
22 randomized dose-escalation trial for prostate cancer. *Int J Radiat Oncol Biol Phys.*  
23 Jan 1 2008;70(1):67-74.  
24
- 25 **62.** Marzi S, Saracino B, Petrongari MG, et al. Modeling of alpha/beta for late rectal  
26 toxicity from a randomized phase II study: conventional versus hypofractionated  
27 scheme for localized prostate cancer. *J Exp Clin Cancer Res.* 2009;28:117.  
28
- 29 **63.** Norkus D, Miller A, Kurtinaitis J, et al. A randomized trial comparing hypofractionated  
30 and conventionally fractionated three-dimensional external-beam radiotherapy for  
31 localized prostate adenocarcinoma : a report on acute toxicity. *Strahlenther Onkol.*  
32 Nov 2009;185(11):715-721.  
33
- 34 **64.** Norkus D, Miller A, Plieskiene A, et al. A randomized trial comparing  
35 hypofractionated and conventionally fractionated three-dimensional conformal  
36 external-beam radiotherapy for localized prostate adenocarcinoma: a report on the  
37 first-year biochemical response. *Medicina (Kaunas).* 2009;45(6):469-475.  
38
- 39 **65.** Peeters ST, Heemsbergen WD, van Putten WL, et al. Acute and late complications  
40 after radiotherapy for prostate cancer: results of a multicenter randomized trial  
41 comparing 68 Gy to 78 Gy. *Int J Radiat Oncol Biol Phys.* Mar 15 2005;61(4):1019-  
42 1034.  
43
- 44 **66.** Peeters ST, Lebesque JV, Heemsbergen WD, et al. Localized volume effects for late  
45 rectal and anal toxicity after radiotherapy for prostate cancer. *Int J Radiat Oncol Biol*  
46 *Phys.* Mar 15 2006;64(4):1151-1161.  
47
- 48 **67.** Robinson JW, Donnelly BJ, Siever JE, et al. A randomized trial of external beam  
49 radiotherapy versus cryoablation in patients with localized prostate cancer: quality of  
50 life outcomes. *Cancer.* Oct 15 2009;115(20):4695-4704.  
51
- 52 **68.** Syndikus I, Morgan RC, Sydes MR, et al. Late gastrointestinal toxicity after dose-  
53 escalated conformal radiotherapy for early prostate cancer: results from the UK  
54 Medical Research Council RT01 trial (ISRCTN47772397). *Int J Radiat Oncol Biol*  
55 *Phys.* Jul 1 2010;77(3):773-783.  
56  
57  
58  
59  
60

- 1  
2  
3 **69.** van der Wielen GJ, Hoogeman MS, Dohle GR, et al. Dose-volume parameters of the  
4 corpora cavernosa do not correlate with erectile dysfunction after external beam  
5 radiotherapy for prostate cancer: results from a dose-escalation trial. *Int J Radiat*  
6 *Oncol Biol Phys.* Jul 1 2008;71(3):795-800.  
7
- 8 **70.** Wilt TJ, Brawer MK, Jones KM, et al. Radical prostatectomy versus observation for  
9 localized prostate cancer. *N Engl J Med.* Jul 19 2012;367(3):203-213.  
10
- 11 **71.** Yeoh EE, Botten RJ, Butters J, et al. Hypofractionated versus conventionally  
12 fractionated radiotherapy for prostate carcinoma: final results of phase III randomized  
13 trial. *Int J Radiat Oncol Biol Phys.* Dec 1 2011;81(5):1271-1278.  
14
- 15 **72.** Yeoh EE, Holloway RH, Fraser RJ, et al. Hypofractionated versus conventionally  
16 fractionated radiation therapy for prostate carcinoma: updated results of a phase III  
17 randomized trial. *Int J Radiat Oncol Biol Phys.* Nov 15 2006;66(4):1072-1083.  
18
- 19 **73.** Yeoh EK, Holloway RH, Fraser RJ, et al Anorectal function after three- versus two-  
20 dimensional radiation therapy for carcinoma of the prostate. *Int J Radiat Oncol Biol*  
21 *Phys.* Jan 1 2009;73(1):46-52.  
22
- 23 **74.** Zietman AL, Bae K, Slater JD, et al. Randomized trial comparing conventional-dose  
24 with high-dose conformal radiation therapy in early-stage adenocarcinoma of the  
25 prostate: long-term results from proton radiation oncology group/american college of  
26 radiology 95-09. *J Clin Oncol.* Mar 1 2010;28(7):1106-1111.  
27
- 28 **75.** Zietman AL, DeSilvio ML, Slater JD, et al. Comparison of conventional-dose vs high-  
29 dose conformal radiation therapy in clinically localized adenocarcinoma of the  
30 prostate: a randomized controlled trial. *JAMA.* Sep 14 2005;294(10):1233-1239.  
31
- 32 **76.** Widmark A. Prospective Randomized Trial Comparing External Beam Radiotherapy  
33 versus Watchful Waiting in Early Prostate Cancer (T1b-T2, pN0, Grade 1-2, M0).  
34 2011 annual meeting of the American Society for Therapeutic Radiology And  
35 Oncology, ASTRO. <http://www.oncolink.org/conferences/article.cfm?id=2171&ss=350>.  
36 2011.  
37
- 38 **77.** Fransson P, Damber JE, Tomic R, et al. Quality of life and symptoms in a  
39 randomized trial of radiotherapy versus deferred treatment of localized prostate  
40 carcinoma. *Cancer.* Dec 15 2001;92(12):3111-3119.  
41
- 42 **78.** Fransson P, Damber JE, Widmark A. Health-related quality of life 10 years after  
43 external beam radiotherapy or watchful waiting in patients with localized prostate  
44 cancer. *Scand J Urol Nephrol.* 2009;43(2):119-126.  
45
- 46 **79.** Bannuru RR, Dvorak T, Obadan N, et al. Comparative evaluation of radiation  
47 treatments for clinically localized prostate cancer: an updated systematic review. *Ann*  
48 *Intern Med.* Aug 2 2011;155(3):171-178.  
49
- 50 **80.** Hegarty J, Beirne PV, Walsh E, et al. Radical prostatectomy versus watchful waiting  
51 for prostate cancer. *Cochrane Database Syst Rev.* 2010;11:CD006590.  
52
- 53 **81.** Hummel S, Simpson EL, Hemingway P, et al. Intensity-modulated radiotherapy for  
54 the treatment of prostate cancer: a systematic review and economic evaluation.  
55 *Health Technol Assess.* Oct 2010;14(47):1-108, iii-iv.  
56  
57  
58  
59  
60

- 1  
2  
3 **82.** Koukourakis G, Kelekis N, Armonis V, et al. Brachytherapy for prostate cancer: a  
4 systematic review. *Adv Urol.* 2009;327945.  
5  
6 **83.** Morris DE, Emami B, Mauch PM, et al. Evidence-based review of three-dimensional  
7 conformal radiotherapy for localized prostate cancer: an ASTRO outcomes initiative.  
8 *Int J Radiat Oncol Biol Phys.* May 1 2005;62(1):3-19.  
9  
10 **84.** Olsen DR, Bruland OS, Frykholm G, et al. Proton therapy - a systematic review of  
11 clinical effectiveness. *Radiother Oncol.* May 2007;83(2):123-132.  
12  
13 **85.** Pasquier D, Ballereau C. Adjuvant and salvage radiotherapy after prostatectomy for  
14 prostate cancer: a literature review. *Int J Radiat Oncol Biol Phys.* Nov 15  
15 2008;72(4):972-979.  
16  
17 **86.** Peinemann F, Grouven U, Bartel C, Sauerland S, et al. Permanent interstitial low-  
18 dose-rate brachytherapy for patients with localised prostate cancer: a systematic  
19 review of randomised and nonrandomised controlled clinical trials. *Eur Urol.* Nov  
20 2011;60(5):881-893.  
21  
22 **87.** Peinemann F, Grouven U, Hemkens LG, et al. Low-dose rate brachytherapy for men  
23 with localized prostate cancer. *Cochrane Database Syst Rev.* 2011(7):CD008871.  
24  
25 **88.** Pieters BR, de Back DZ, Koning CC, et al. Comparison of three radiotherapy  
26 modalities on biochemical control and overall survival for the treatment of prostate  
27 cancer: a systematic review. *Radiother Oncol.* Nov 2009;93(2):168-173.  
28  
29 **89.** Shelley M, Wilt TJ, Coles B, et al. Cryotherapy for localised prostate cancer.  
30 *Cochrane Database Syst Rev.* 2007(3):CD005010.  
31  
32 **90.** Staffurth J. A review of the clinical evidence for intensity-modulated radiotherapy.  
33 *Clin Oncol (R Coll Radiol).* Oct 2010;22(8):643-657.  
34  
35 **91.** van Tol-Geerdink JJ, Stalmeier PF, Pasker-de Jong PC, et al. Systematic review of  
36 the effect of radiation dose on tumor control and morbidity in the treatment of  
37 prostate cancer by 3D-CRT. *Int J Radiat Oncol Biol Phys.* Feb 1 2006;64(2):534-543.  
38  
39 **92.** Viani GA, da Silva LG, Stefano EJ. High-dose conformal radiotherapy reduces  
40 prostate cancer-specific mortality: results of a meta-analysis. *Int J Radiat Oncol Biol*  
41 *Phys.* Aug 1 2012;83(5):e619-625.  
42  
43 **93.** Viani GA, Stefano EJ, Afonso SL. Higher-than-conventional radiation doses in  
44 localized prostate cancer treatment: a meta-analysis of randomized, controlled trials.  
45 *Int J Radiat Oncol Biol Phys.* Aug 1 2009;74(5):1405-1418.  
46  
47 **94.** Wilt TJ, MacDonald R, Rutks I, et al. Systematic review: comparative effectiveness  
48 and harms of treatments for clinically localized prostate cancer. *Ann Intern Med.* Mar  
49 18 2008;148(6):435-448.  
50  
51 **95.** Sajid S, Kotwal AA, Dale W. Interventions to improve decision making and reduce  
52 racial and ethnic disparities in the management of prostate cancer: a systematic  
53 review. *J Gen Intern Med.* Aug 2012;27(8):1068-1078.  
54  
55 **96.** Abdollah F, Schmitges J, Sun M, et al. Comparison of mortality outcomes after  
56 radical prostatectomy versus radiotherapy in patients with localized prostate cancer:  
57  
58  
59  
60

- 1  
2  
3 a population-based analysis. *Int J Urol*. Sep 2012;19(9):836-844; author reply 844-  
4 835.
- 5  
6 **97.** Boorjian SA, Karnes RJ, Viterbo R, et al. Long-term survival after radical  
7 prostatectomy versus external-beam radiotherapy for patients with high-risk prostate  
8 cancer. *Cancer*. Jul 1 2011;117(13):2883-2891.
- 9  
10 **98.** Cooperberg MR, Vickers AJ, Broering JM, et al. Comparative risk-adjusted mortality  
11 outcomes after primary surgery, radiotherapy, or androgen-deprivation therapy for  
12 localized prostate cancer. *Cancer*. Nov 15 2010;116(22):5226-5234.
- 13  
14 **99.** Zelefsky MJ, Eastham JA, Cronin AM, et al. Metastasis after radical prostatectomy or  
15 external beam radiotherapy for patients with clinically localized prostate cancer: a  
16 comparison of clinical cohorts adjusted for case mix. *J Clin Oncol*. Mar 20  
17 2010;28(9):1508-1513.
- 18  
19 **100.** Lu G, Ades AE. Assessing evidence inconsistency in mixed treatment comparisons.  
20 *Journal of the American Statistical Association*, 2006;101(474), 447-459.
- 21  
22 **101.** Lu G, Ades AE. Modeling between-trial variance structure in mixed treatment  
23 comparisons. *Biostatistics*, 2009;10(4), 792-805.
- 24  
25 **102.** Resnick MJ, Koyama T, Fan KH, et al. Long-term functional outcomes after treatment  
26 for localized prostate cancer. *N Engl J Med*, 2013;368(5):436-45.
- 27  
28 **103.** Sooriakumaran P1, Nyberg T, Akre O, et al. Comparative effectiveness of radical  
29 prostatectomy and radiotherapy in prostate cancer: observational study of mortality  
30 outcomes. *BMJ*. 2014 Feb 26;348:g1502. doi: 10.1136/bmj.g1502.
- 31  
32

### 33 **Figure Legends**

34  
35  
36 Figure 1. Flow chart of the inclusion process of the studies for network meta-analysis

37  
38 Figure 2. Risk of bias assessments for the included randomized trials

39  
40  
41 Figure 3. Network of comparisons of treatments for localized prostate cancer  
42 showing numbers of trials in which each pairwise comparison had been made  
43  
44  
45  
46  
47  
48  
49  
50  
51  
52  
53  
54  
55  
56  
57  
58  
59  
60

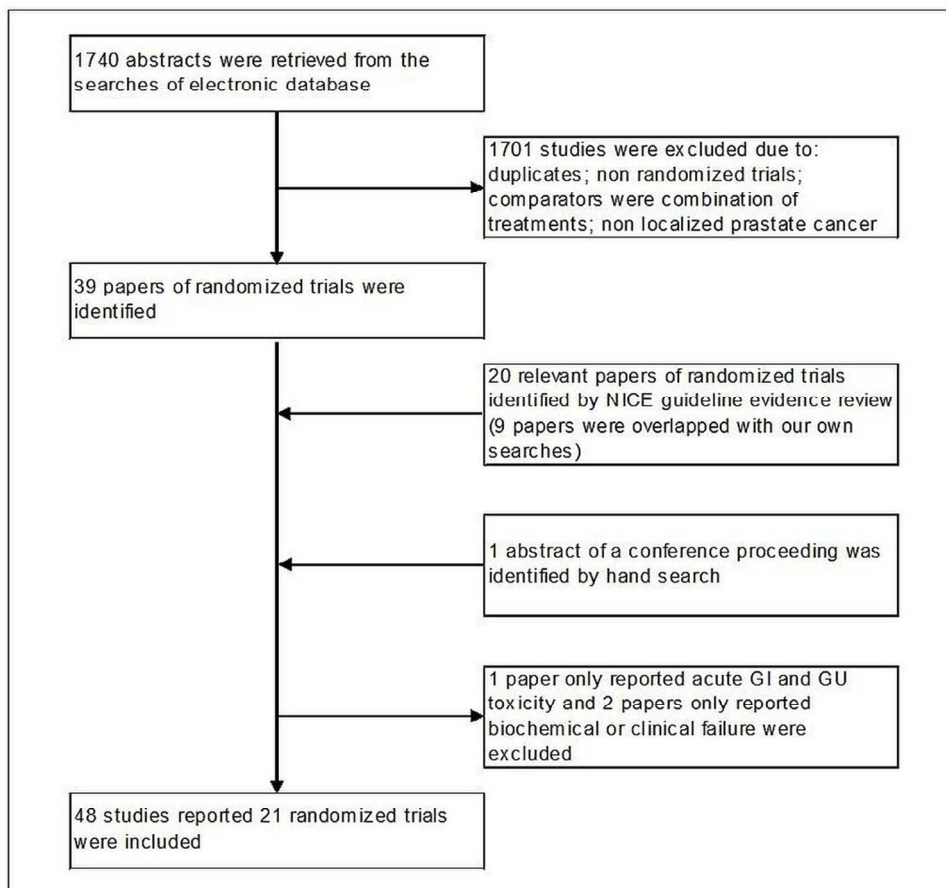

Figure 1. Flow chart of the inclusion process of the studies for network meta-analysis  
90x83mm (300 x 300 DPI)

1  
2  
3  
4  
5  
6  
7  
8  
9  
10  
11  
12  
13  
14  
15  
16  
17  
18  
19  
20  
21  
22  
23  
24  
25  
26  
27  
28  
29  
30  
31  
32  
33  
34  
35  
36  
37  
38  
39  
40  
41  
42  
43  
44  
45  
46  
47  
48  
49  
50  
51  
52  
53  
54  
55  
56  
57  
58  
59  
60

Figure 2. Risk of bias assessments for the included randomized trials

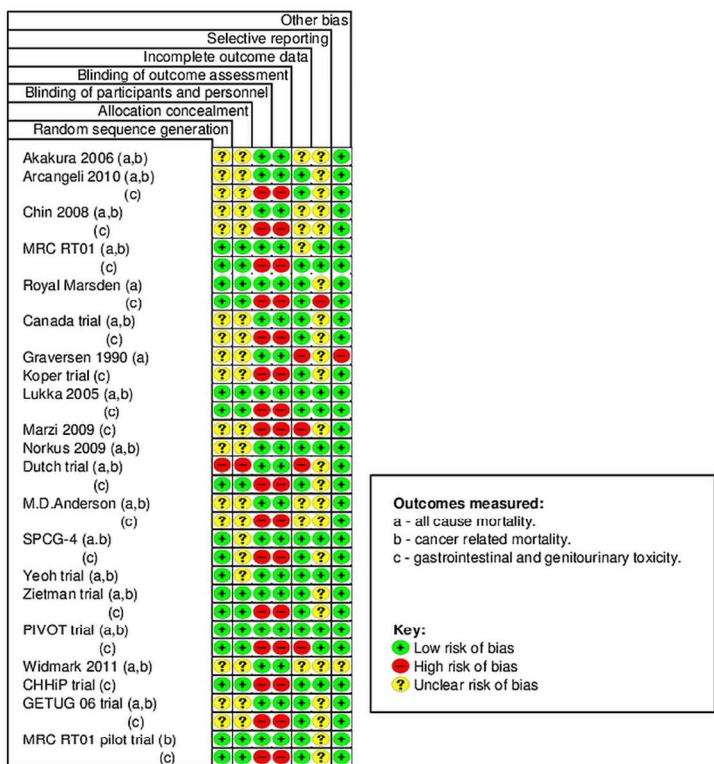

Risk of bias assessments for the included randomized trials  
90x116mm (300 x 300 DPI)



1  
2  
3  
4  
5  
6  
7  
8  
9  
10  
11  
12  
13  
14  
15  
16  
17  
18  
19  
20  
21  
22  
23  
24  
25  
26  
27  
28  
29  
30  
31  
32  
33  
34  
35  
36  
37  
38  
39  
40  
41  
42  
43  
44  
45  
46  
47  
48  
49  
50  
51  
52  
53  
54  
55  
56  
57  
58  
59  
60

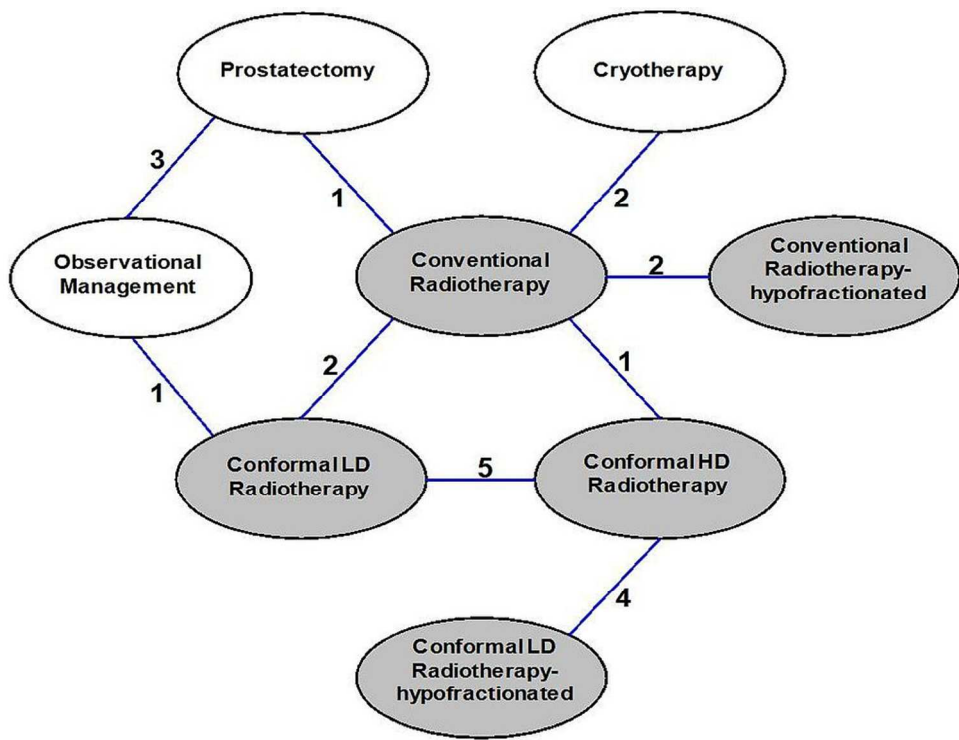

Figure 3. Network of comparisons of treatments for localized prostate cancer 90x69mm (300 x 300 DPI)

ew only

**Appendix 1.** Full search strategy for Medline made on 12 Sep 2012

|    |                                                                                                                             |         |
|----|-----------------------------------------------------------------------------------------------------------------------------|---------|
| 1  | "watchful wait\$.ti,ab                                                                                                      | 1408    |
| 2  | (watch\$ adj2 wait\$.ti,ab                                                                                                  | 1795    |
| 3  | "observation".ti,ab                                                                                                         | 201605  |
| 4  | "watchful surveillance".ti,ab                                                                                               | 3       |
| 5  | "watchful monitoring".ti,ab                                                                                                 | 14      |
| 6  | "active surveillance".ti,ab                                                                                                 | 2609    |
| 7  | "active monitoring".ti,ab                                                                                                   | 177     |
| 8  | "expectant manag\$.ti,ab                                                                                                    | 1501    |
| 9  | "expectant monitoring".ti,ab                                                                                                | 18      |
| 10 | "expectant surveillance".ti,ab                                                                                              | 3       |
| 11 | "deferred treatment\$.ti,ab                                                                                                 | 174     |
| 12 | "deferred therap\$.ti,ab                                                                                                    | 53      |
| 13 | "delayed treatment\$.ti,ab                                                                                                  | 1752    |
| 14 | "delayed therap\$.ti,ab                                                                                                     | 264     |
| 15 | "conservative monitoring".ti,ab                                                                                             | 10      |
| 16 | 1 OR 2 OR 3 OR 4 OR 5 OR 6 OR 7 OR 8 OR 9 OR 10 OR 11 OR 12<br>OR 13 OR 14 OR 15                                            | 209461  |
| 17 | exp PROSTATIC NEOPLASMS/                                                                                                    | 83203   |
| 18 | PROSTATIC INTRAEPITHELIAL NEOPLASIA/                                                                                        | 1124    |
| 19 | pin.ti,ab                                                                                                                   | 9241    |
| 20 | ((prostat\$ adj3 (cancer\$ OR carcinoma\$ OR malignan\$ OR tumo?r\$ OR<br>neoplas\$ OR intraepithelial\$ OR adeno\$)).ti,ab | 85456   |
| 21 | 17 OR 18 OR 19 OR 20                                                                                                        | 109867  |
| 22 | RANDOMIZED CONTROLLED TRIALS AS TOPIC/                                                                                      | 82900   |
| 23 | RANDOMIZED CONTROLLED TRIAL/                                                                                                | 336590  |
| 24 | RANDOM ALLOCATION/                                                                                                          | 75700   |
| 25 | DOUBLE BLIND METHOD/                                                                                                        | 116906  |
| 26 | SINGLE BLIND METHOD/                                                                                                        | 16674   |
| 27 | CLINICAL TRIAL/                                                                                                             | 473817  |
| 28 | "clinical trial, phase i".pt                                                                                                | 12527   |
| 29 | "clinical trial, phase ii".pt                                                                                               | 20003   |
| 30 | "clinical trial, phase iii".pt                                                                                              | 7335    |
| 31 | "clinical trial, phase iv".pt                                                                                               | 739     |
| 32 | "controlled clinical trial".pt                                                                                              | 85134   |
| 33 | "randomized controlled trial".pt                                                                                            | 336590  |
| 34 | "multicenter study".pt                                                                                                      | 149366  |
| 35 | "clinical trial".pt                                                                                                         | 473817  |
| 36 | exp CLINICAL TRIALS AS TOPIC/                                                                                               | 260613  |
| 37 | 22 OR 23 OR 24 OR 25 OR 26 OR 27 OR 28 OR 29 OR 30 OR 31 OR<br>32 OR 33 OR 34 OR 35 OR 36                                   | 933873  |
| 38 | (clinical ADJ trial\$.ti,ab                                                                                                 | 185348  |
| 39 | ((singl\$ OR doubl\$ OR treb\$ OR tripl\$) AND (blind\$3 OR mask\$3)).ti,ab                                                 | 129000  |
| 40 | PLACEBOS/                                                                                                                   | 31302   |
| 41 | placebo\$.ti,ab                                                                                                             | 144213  |
| 42 | "randomly allocated".ti,ab                                                                                                  | 14778   |
| 43 | (allocated adj2 random\$.ti,ab                                                                                              | 17183   |
| 44 | 38 OR 39 OR 40 OR 41 OR 42 OR 43                                                                                            | 383691  |
| 45 | 37 OR 44                                                                                                                    | 1064978 |
| 46 | (case AND report).ti,ab                                                                                                     | 372325  |
| 47 | LETTER/                                                                                                                     | 776512  |



|    |    |                                                           |         |
|----|----|-----------------------------------------------------------|---------|
| 1  |    |                                                           |         |
| 2  |    |                                                           |         |
| 3  | 48 | HISTORICAL ARTICLE/                                       | 286394  |
| 4  | 49 | 46 OR 47 OR 48                                            | 1422877 |
| 5  | 50 | 45 NOT 49                                                 | 1033939 |
| 6  | 51 | CRYOTHERAPY/                                              | 3337    |
| 7  | 52 | CRYOSURGERY/                                              | 10459   |
| 8  | 53 | HYPOTHERMIA, INDUCED/                                     | 15628   |
| 9  | 54 | cryoablat\$.ti,ab                                         | 1810    |
| 10 | 55 | (cryo\$ ADJ ablat\$).ti,ab                                | 351     |
| 11 | 56 | cryotreatment\$.ti,ab                                     | 65      |
| 12 | 57 | cryotherap\$.ti,ab                                        | 4776    |
| 13 | 58 | cryotherm\$.ti,ab                                         | 212     |
| 14 | 59 | (cryo\$ ADJ surgery).ti,ab                                | 149     |
| 15 | 60 | 51 OR 52 OR 53 OR 54 OR 55 OR 56 OR 57 OR 58 OR 59        | 31372   |
| 16 | 61 | ((cryo\$ OR hypotherm\$ OR freez\$) adj5 prostat\$).ti,ab | 709     |
| 17 | 62 | 60 AND 21                                                 | 916     |
| 18 | 63 | 61 OR 62                                                  | 1089    |
| 19 | 64 | PROSTATECTOMY/                                            | 19443   |
| 20 | 65 | prostatectom\$.ti,ab                                      | 18653   |
| 21 | 66 | resection.ti,ab                                           | 170070  |
| 22 | 67 | 64 OR 65 OR 66                                            | 192628  |
| 23 | 68 | (radical OR complete\$ OR total OR "en bloc").ti,ab       | 2057017 |
| 24 | 69 | 67 AND 68                                                 | 69466   |
| 25 | 70 | (LRP OR TLRP OR RALRP OR RAP OR RRP OR RPP OR EERP).ti,ab | 7847    |
| 26 | 71 | "heilbronn technique".ti,ab                               | 8       |
| 27 | 72 | 70 OR 71                                                  | 7853    |
| 28 | 73 | 69 OR 72                                                  | 76420   |
| 29 | 74 | exp RADIOTHERAPY/                                         | 125988  |
| 30 | 75 | "radiation therap\$".ti,ab                                | 46061   |
| 31 | 76 | "radiation treatment\$".ti,ab                             | 6068    |
| 32 | 77 | radiotherap\$.ti,ab                                       | 103759  |
| 33 | 78 | exp RADIOTHERAPY PLANNING/                                | 11242   |
| 34 | 79 | irradiation.ti,ab                                         | 133551  |
| 35 | 80 | RADIOTHERAPY, ADJUVANT/                                   | 15412   |
| 36 | 81 | 74 OR 75 OR 76 OR 77 OR 78 OR 79 OR 80                    | 307483  |
| 37 | 82 | META-ANALYSIS AS TOPIC/                                   | 12419   |
| 38 | 83 | "meta analy\$".ti,ab                                      | 45804   |
| 39 | 84 | metaanaly\$.ti,ab                                         | 1171    |
| 40 | 85 | META-ANALYSIS/                                            | 36142   |
| 41 | 86 | (systematic ADJ review\$1).ti,ab                          | 37644   |
| 42 | 87 | (systematic ADJ overview\$1).ti,ab                        | 489     |
| 43 | 88 | exp REVIEW LITERATURE AS TOPIC/                           | 6486    |
| 44 | 89 | 82 OR 83 OR 84 OR 85 OR 86 OR 87 OR 88                    | 93039   |
| 45 | 90 | cochrane.ab                                               | 22743   |
| 46 | 91 | embase.ab                                                 | 20328   |
| 47 | 92 | (psychlit OR psyclit).ab                                  | 865     |
| 48 | 93 | (psychinfo OR psycinfo).ab                                | 7698    |
| 49 | 94 | (cinahl OR cinhal).ab                                     | 7537    |
| 50 | 95 | "science citation index".ab                               | 1633    |
| 51 | 96 | bids.ab                                                   | 331     |
| 52 | 97 | cancerlit.ab                                              | 560     |
| 53 | 98 | 90 OR 91 OR 92 OR 93 OR 94 OR 95 OR 96 OR 97              | 37065   |
| 54 | 99 | "reference list\$.ab                                      | 7905    |
| 55 |    |                                                           |         |
| 56 |    |                                                           |         |
| 57 |    |                                                           |         |
| 58 |    |                                                           |         |
| 59 |    |                                                           |         |
| 60 |    |                                                           |         |

|     |                                                                                |            |
|-----|--------------------------------------------------------------------------------|------------|
| 100 | bibliograph\$.ab                                                               | 10314      |
| 101 | hand-search\$.ab                                                               | 3303       |
| 102 | "relevant journals".ab                                                         | 586        |
| 103 | "manual search\$.ab                                                            | 1920       |
| 104 | 99 OR 100 OR 101 OR 102 OR 103                                                 | 21486      |
| 105 | "selection criteria".ab                                                        | 16935      |
| 106 | "data extraction".ab                                                           | 8148       |
| 107 | 105 OR 106                                                                     | 23737      |
| 108 | REVIEW/                                                                        | 1733836    |
| 109 | 107 AND 108                                                                    | 15770      |
| 110 | COMMENT/                                                                       | 517077     |
| 111 | LETTER/                                                                        | 776512     |
| 112 | EDITORIAL/                                                                     | 317040     |
| 113 | ANIMAL/                                                                        | 5040870    |
| 114 | HUMAN/                                                                         | 12536636   |
| 115 | 113 NOT (113 AND 114)                                                          | 3686418    |
| 116 | 110 OR 111 OR 112 OR 115                                                       | 4846136    |
| 117 | 89 OR 98 OR 104 OR 109                                                         | 118824     |
| 118 | 117 NOT 116                                                                    | 110572     |
| 119 | ULTRASOUND, HIGH-INTENSITY FOCUSED, TRANSRECTAL/                               | 306        |
| 120 | ((high intensity adj2 ultraso\$)).ti,ab                                        | 2103       |
| 121 | HIFU.ti,ab                                                                     | 1012       |
| 122 | ((high intensity focused ultrasound)).ti,ab                                    | 1381       |
| 123 | "focal therapy".ti,ab                                                          | 295        |
| 124 | 119 OR 120 OR 121 OR 122 OR 123                                                | 2619       |
| 125 | 21 AND 50 AND 124                                                              | <b>99</b>  |
| 126 | 16 AND 21 AND 50 AND 63 [Limit to: Publication Year 2005-Current]              | <b>10</b>  |
| 127 | 16 AND 21 AND 50 AND 73 [Limit to: Publication Year 2005-Current]              | <b>94</b>  |
| 128 | 16 AND 21 AND 50 AND 81 [Limit to: Publication Year 2005-Current]              | <b>82</b>  |
| 129 | 50 AND 63 AND 81 [Limit to: Publication Year 2005-Current]                     | <b>27</b>  |
| 130 | 50 AND 63 AND 73 [Limit to: Publication Year 2005-Current]                     | <b>14</b>  |
| 131 | 21 AND 50 AND 73 AND 81 [Limit to: Publication Year 2005-Current]              | <b>267</b> |
| 132 | (21 AND 50 AND 81) NOT (128 OR 131) [Limit to: Publication Year 2005-Current]  | <b>947</b> |
| 133 | 16 AND 21 AND 63 AND 118 [Limit to: Publication Year 2005-Current]             | <b>5</b>   |
| 134 | 16 AND 21 AND 73 AND 118 [Limit to: Publication Year 2005-Current]             | <b>25</b>  |
| 135 | 16 AND 21 AND 81 AND 118 [Limit to: Publication Year 2005-Current]             | <b>27</b>  |
| 136 | 63 AND 81 AND 118 [Limit to: Publication Year 2005-Current]                    | <b>14</b>  |
| 137 | 63 AND 73 AND 118 [Limit to: Publication Year 2005-Current]                    | <b>12</b>  |
| 138 | 21 AND 73 AND 81 AND 118 [Limit to: Publication Year 2005-Current]             | <b>56</b>  |
| 139 | (21 AND 81 AND 118) NOT (135 OR 138) [Limit to: Publication Year 2005-Current] | <b>61</b>  |

Appendix 2. Characteristics of included studies

| Comparison                                                     | Trial title                                                       | Author, year                                                        | Country                    | Population                                                                                                                                                               | No. of men | Interventions and Comparisons                                                                                                                        | Outcomes                                                                                                                                                                          | Follow up         |
|----------------------------------------------------------------|-------------------------------------------------------------------|---------------------------------------------------------------------|----------------------------|--------------------------------------------------------------------------------------------------------------------------------------------------------------------------|------------|------------------------------------------------------------------------------------------------------------------------------------------------------|-----------------------------------------------------------------------------------------------------------------------------------------------------------------------------------|-------------------|
| Observational management v Prostatectomy (3 trials)            | Graverson 1990 (1 paper)                                          | Graverson 1990                                                      | USA                        | Dates of enrolment to study: Between May 1967 and March 1975; Setting: Multi-centre (15 participating hospitals); Age: All age; Disease status: stage I or II (T0 – T2). | 142        | 1. Watchful waiting (74 men)<br>2. Prostatectomy (68 men)                                                                                            | Overall survival.                                                                                                                                                                 | 15 years.         |
|                                                                | PIVOT trial (1 paper)                                             | Wilt 2012                                                           | USA                        | Dates of enrolment to study: Nov 1994 to Jan 2002; Setting: multicentre; Mean age: 67yr; Disease status: T1-T2NxM0.                                                      | 731        | 1. Observation (367 men)<br>2. Prostatectomy (364 men)                                                                                               | All cause mortality; Cancer caused mortality; Bone metastases; Urinary incontinence; Bowel dysfunction; Erectile dysfunction.                                                     | 10 years.         |
|                                                                | Scandinavian Prostate Cancer Group Study No 4 (SPCG-4) (6 papers) | Bill-Axelsson 2005, 2008, 2011; Johansson 2009, 2011 Steineck 2002; | Sweden, Finland, Iceland   | Dates of enrolment to study: Oct 1989 to Feb 1999; Setting: Multi-centre (14 participating hospitals); Age: Mean age 64.7; Disease status: T0d, T1, T2.                  | 695        | 1. Watchful waiting (348 men)<br>2. Prostatectomy (347 men)                                                                                          | Death due to prostate cancer; All-caused mortality; Distance metastasis; Local progression; overall distress from all bowel symptoms, overall distress from all urinary symptoms. | 8.2 - 12.8 years. |
| Observational management v Conformal LD radiotherapy (1 trial) | Widmark 2011 (1 paper)                                            | Widmark 2011                                                        | Sweden, Denmark and Norway | Dates of enrolment to study: Apr 1986 to Jan 1997; Setting: unknown; Age: up to 75; Disease status: T1b-T2, pN0, G1-G2, M0.                                              | 214        | 1. Watchful waiting (107 men)<br>2. 3D conformal radiotherapy, either 64 Gy in 32 fractions with 2cm margin, or 64-68 Gy with 1.5cm margin (107 men) | All-cause mortality, Prostate cancer mortality, Distant progression, Recurrence free survival, Clinical progression, Biochemical progression, Local progression.                  | 20 years.         |

|                                                                                                       |                                                      |                         |                                    |        |                                                                                                                                                                                                                           |     |                                                                                                                                                                                                                                                                                                                                  |                                                                                                                                                                                                                     |                                  |
|-------------------------------------------------------------------------------------------------------|------------------------------------------------------|-------------------------|------------------------------------|--------|---------------------------------------------------------------------------------------------------------------------------------------------------------------------------------------------------------------------------|-----|----------------------------------------------------------------------------------------------------------------------------------------------------------------------------------------------------------------------------------------------------------------------------------------------------------------------------------|---------------------------------------------------------------------------------------------------------------------------------------------------------------------------------------------------------------------|----------------------------------|
| 1<br>2<br>3<br>4<br>5<br>6<br>7<br>8<br>9<br>10<br>11<br>12<br>13<br>14<br>15<br>16<br>17<br>18<br>19 | Prostatectomy v Conventional radiotherapy (2 trials) | Akakura 2006(1 paper)   | Akakura 2006                       | Japan  | Dates of enrolment to study: 1989 to 1993; Setting: Multi-centre; Age: Mean 68.1, SD 7.0 in surgery group; mean 68.7, SD 6.6 in radiation group; Disease status: T2b-3N0M0, no evidence of lymph node metastasis.         | 95  | 1. Prostatectomy (46 men).2. Conventional radiotherapy (49 men): Irradiation by linear accelerator with a 40-50 Gy beam to the whole pelvis followed by a 20 Gy boost to the prostatic area for 6-7 weeks fractionated five times per week. All men received an initial treatment with 8 weeks of neoadjuvant endocrine therapy. | Biochemical progression-free survival at 10 years; Clinical progression-free survival at 10 years; Cause-specific survival at 10 years; Overall survival at 10 years; Adverse effects.                              | Median follow-up was 102 months. |
| 20<br>21<br>22<br>23<br>24<br>25<br>26<br>27                                                          | Cryotherapy v Conventional radiotherapy (2 trials)   | Canada trial (3 papers) | Donnelly 2007, 2010; Robinson 2009 | Canada | Dates of enrolment to study: Dec 1997 to Feb 2003; Setting: Tom Baker Cancer Center, Calgary, Canada; Age: Median 69.4, range 52.8-81.4 in CT group; median 68.6, range 53.2-78.6 in EBRT group; Disease status: T2 - T3. | 244 | 1. Cryotherapy (122 men). 2. Conventional EBRT (122 men): dose of 68 Gy given in 2 Gy fractions daily, 5 days per week, later increased to 70 Gy and later 73.5 Gy.                                                                                                                                                              | Treatment Failure; 5 year overall survival; Biopsy rate at 36 months; Disease-specific survival at 5 years; Genitourinary and gastrointestinal adverse effects; Quality of life.                                    | Median follow-up was 82 months.  |
| 28<br>29<br>30<br>31<br>32<br>33<br>34<br>35<br>36                                                    |                                                      | Chin 2008 (1 paper)     | Chin 2008                          | Canada | Setting: London Health Sciences Centre, University of Western Ontario; Age: Median age 70 in each group; Disease status: T2 - T3.                                                                                         | 64  | 1. Cryotherapy (33 men). 2. Conventional EBRT (31 men): 66 Gy in 33 fractions.                                                                                                                                                                                                                                                   | Biochemical disease-free survival at 4 years; Overall survival at 4 years; Disease specific survival at 4 years; Positive biopsy rate; Gastrointestinal toxicity; Genitourinary toxicity; Hormonal adverse effects. | Mean follow-up 37 months.        |

|                                                                                                    |                                                                                   |                                                                 |                             |             |                                                                                                                                                                                                                                           |     |                                                                                                                                                                                                                                    |                                                                                                                                                                                                                       |                                 |
|----------------------------------------------------------------------------------------------------|-----------------------------------------------------------------------------------|-----------------------------------------------------------------|-----------------------------|-------------|-------------------------------------------------------------------------------------------------------------------------------------------------------------------------------------------------------------------------------------------|-----|------------------------------------------------------------------------------------------------------------------------------------------------------------------------------------------------------------------------------------|-----------------------------------------------------------------------------------------------------------------------------------------------------------------------------------------------------------------------|---------------------------------|
| 1<br>2<br>3<br>4<br>5<br>6<br>7<br>8<br>9<br>10<br>11<br>12<br>13<br>14                            | Conventional radiotherapy v Conventional radiotherapy-hypofractionated (2 trials) | Yeoh trial (4 papers)                                           | Yeoh 2003, 2006, 2009, 2011 | Australia   | Dates of enrolment to study: July 1996 to Aug 2003; Setting: Department of Radiation Oncology and Gastroenterology, Royal Adelaide Hospital; Age: Median age 69 (44 ~ 82 yrs); Disease status: T1, T2, N0 M0.                             | 217 | 1. Conventional EBRT: 64 Gy in 32 fractions within 6.5 weeks (109 men).<br>2. Hypofractionated EBRT: 55 Gy in 20 fractions within 4 weeks (108 men).                                                                               | Gastrointestinal (GI) and genitourinary (GU) toxicity; overall survival rate; biochemical $\pm$ clinical relapse; biochemical $\pm$ clinical relapse-free survival; cancer-related mortality.                         | 5 years.                        |
| 15<br>16<br>17<br>18<br>19<br>20<br>21<br>22<br>23                                                 |                                                                                   | Lukka 2005 (1 paper)                                            | Lukka 2005                  | Canada      | Dates of enrolment to study: March 1995 – December 1998; Setting: 8 Ontario regional cancer centres and 8 additional Canadian centres; Age: Mean 70.3, range 53-84 in group 1; mean 70.0, range 53-84 in group 2; Disease status: T1, T2. | 936 | 1. Conventional EBRT (470 men): 66 Gy in 33 fractions over 45 days.<br>2. Hypofractionated EBRT (466 men): 52.5 Gy in 20 fractions over 28 days.                                                                                   | Composite of biochemical or clinical failure (BCF); local persistence of tumour on biopsy of the prostate at 2 years; overall survival; acute and late radiation-induced toxicity; prostate cancer-related mortality. | Median follow-up was 5.7 years. |
| 24<br>25<br>26<br>27<br>28<br>29<br>30<br>31<br>32                                                 | Conventional radiotherapy v Conformal LD radiotherapy (2 trials)                  | Koper trial (2 papers)                                          | Koper 1999, 2004            | Netherlands | Dates of enrolment to study: June 1994 to March 1996; Setting: Erasmus Medical Center/Daniel den Hoed Cancer Center; Mean age: group1: 70 (6.4); group 2: 69.5 (6.1); Disease status: T1-T4 N0M0.                                         | 266 | 1. Conventional radiotherapy (134 men);<br>2. Conformal radiotherapy (129 men). All men were treated to a dose of 66 Gy, using the same planning procedure, treatment technique, linear accelerator, and portal imaging procedure. | Gastrointestinal (GI) and genitourinary (GU) toxicity.                                                                                                                                                                | 2 years.                        |
| 33<br>34<br>35<br>36<br>37<br>38<br>39<br>40<br>41<br>42<br>43<br>44<br>45<br>46<br>47<br>48<br>49 |                                                                                   | Royal Marsden and Institute of Cancer Research study (2 papers) | Dearnaley 1999; Tait 1997   | UK          | Dates of enrolment to study: 1988 to 1995; Setting: Tertiary care, single centre; Median age (range): 69 (51-80) in group 1, 68 (50-83) in group 2; Disease status: T1-T4 N0M0.                                                           | 225 | 1. Conventional radiotherapy (111 men): 60 to 64 Gy in 2 Gy fractions.<br>2. Conformal radiotherapy (114 men): 60 to 64 Gy in 2 Gy fractions.                                                                                      | Overall survival; Biochemical progression free survival; Late GI toxicity; Late GU toxicity.                                                                                                                          | 2 - 5 years.                    |

|                                                                |                                                                  |                                   |                                                                                     |                                                                                                                                                                                            |                                                                                                                                                                         |                                                                                                                                                          |                                                                                                                                                                                                                                                                                                   |                                                                                                                                                                                        |              |
|----------------------------------------------------------------|------------------------------------------------------------------|-----------------------------------|-------------------------------------------------------------------------------------|--------------------------------------------------------------------------------------------------------------------------------------------------------------------------------------------|-------------------------------------------------------------------------------------------------------------------------------------------------------------------------|----------------------------------------------------------------------------------------------------------------------------------------------------------|---------------------------------------------------------------------------------------------------------------------------------------------------------------------------------------------------------------------------------------------------------------------------------------------------|----------------------------------------------------------------------------------------------------------------------------------------------------------------------------------------|--------------|
| 1<br>2<br>3<br>4<br>5<br>6<br>7<br>8<br>9<br>10<br>11          | Conformal LD radiotherapy v Conformal HD radiotherapy (5 trials) | Dutch trial (7 papers)            | Al-Mamgani 2008, 2011; Heemsbergen 2007; Peeters 2005, 2006a,b; van der Wielen 2008 | Netherlands                                                                                                                                                                                | Dates of enrolment to study: between June 1997 and February 2003; Setting: multi-center; Age: mean 68.6 and 68.8, range 50.3-82.9 and 48.7-83.6; Disease status: T1-T4. | 669                                                                                                                                                      | 1. 3D conformal radiotherapy 68 Gy (331 men).<br>2. 3D conformal radiotherapy 78 Gy (333 men).                                                                                                                                                                                                    | freedom from failure; biochemical progression free survival; clinical progression free survival; overall survival; late GI toxicity; late GU toxicity; prostate cancer related deaths. | 2 - 7 years. |
| 12<br>13<br>14<br>15<br>16<br>17<br>18                         | MRC RT01 pilot trial (1 paper)                                   | Dearnaley 2005                    | UK                                                                                  | Dates of enrolment to study: between Jul 1995 and Dec 1997; Setting: Royal Marsden NHS Trust and Institute of Cancer Research; Age: median 66 and 69; Disease status: T1b-T3b N0 M0.       | 127                                                                                                                                                                     | 1. Conformal radiotherapy, standard dose (64 men): 64 Gy in 2 Gy fractions.<br>2. Conformal radiotherapy, high dose (63 men): 74 Gy in 2 Gy fractions.   | Biochemical (PSA) failure; Local or metastatic failure; Hormone therapy restarted; acute GU toxicity; acute GI toxicity; late GU toxicity; late GI toxicity; prostate cancer caused deaths.                                                                                                       | 5 years.                                                                                                                                                                               |              |
| 19<br>20<br>21<br>22<br>23<br>24<br>25<br>26<br>27<br>28<br>29 | MRC RT01 (3 papers)                                              | Dearnaley 2007a,b; Syndikus 2010. | UK                                                                                  | Dates of enrolment to study: Jan 1998 to Dec 2002; Setting: multi-centre; Age: median 67 (IQR 63-71); Disease status: T1b-T3a N0 M0.                                                       | 843                                                                                                                                                                     | 1. Conformal radiotherapy, standard dose (421 men): 64 Gy in 2 Gy fractions.<br>2. Conformal radiotherapy, high dose (422 men): 74 Gy in 2 Gy fractions. | Biochemical-progression-free survival; 5-year overall survival; Progression-free survival; Freedom from local progression; Freedom from salvage androgen suppression; Metastases-free survival; Bowel dysfunction; Urinary or bladder dysfunction; Sexual dysfunction; prostate cancer mortality. | 5 years.                                                                                                                                                                               |              |
| 30<br>31<br>32<br>33<br>34<br>35                               | GETUG 06 Trial (2 papers)                                        | Beckendorf 2004, 2011             | France                                                                              | Dates of enrolment to study: Sep 1999 to Feb 2002; Setting: Multicentre; Age: mean 67; Disease status: T1b-T3a, NOM0.                                                                      | 306                                                                                                                                                                     | 1. Conformal radiotherapy, standard dose (153 men): 70 Gy in 2 Gy fractions.<br>2. Conformal radiotherapy, high dose (153 men): 80 Gy in 2 Gy fractions. | Biochemical relapse alone; PSA and clinical relapse; Free from relapse; All cause death; Cancer cause death; RTOG rectal and urinary toxicity grade 2 and worse.                                                                                                                                  | 61 months.                                                                                                                                                                             |              |
| 36<br>37<br>38<br>39<br>40<br>41<br>42<br>43<br>44<br>45       | Zietman trial (2 papers)                                         | Zietman AL, 2005, 2010            | USA                                                                                 | Dates of enrolment to study: between Jan 1996 and Dec 1999; Setting: 2 US academic institutions; Age: 67 (45~91) in 70.2 Gy arm, 66 (47~78) in 79.2 Gy arm; Disease status: T1-T2, N0, Nx. | 393                                                                                                                                                                     | 1. External beam radiation 70.2 Gy (197 men);<br>2. External beam radiation 79.2 Gy (195 men).                                                           | Freedom from biochemical failure 5 yrs after treatment (measured by PSA level); Acute and late GU and GI morbidity, overall survival, prostate cancer-related mortality.                                                                                                                          | 5.5 - 8.9 years.                                                                                                                                                                       |              |

|                                                                                   |                                                            |                                              |           |                                                                                                                                                                |     |                                                                                                                                                                                                                                                    |                                                                                                                                                                                                    |                                  |
|-----------------------------------------------------------------------------------|------------------------------------------------------------|----------------------------------------------|-----------|----------------------------------------------------------------------------------------------------------------------------------------------------------------|-----|----------------------------------------------------------------------------------------------------------------------------------------------------------------------------------------------------------------------------------------------------|----------------------------------------------------------------------------------------------------------------------------------------------------------------------------------------------------|----------------------------------|
| Conformal HD radiotherapy v Conformal LD radiotherapy-hypofractionated (4 trials) | Arcangeli 2010 (2 papers)                                  | Arcangeli 2010, 2011                         | Italy     | Dates of enrolment to study: Jan 2003 to Dec 2007; Setting: single centre; Mean age: 75 years; Disease status: no evidence of distant metastases.              | 168 | 1. hypofractionated (62 Gy/20 fractions/5 weeks, 4 fractions per week): 83 men.<br>2. conventional fractionation radiotherapy (80 Gy/40 fractions/8 weeks): 85 men.                                                                                | Acute and late GU and GI toxicity; biochemical failure; freedom from biochemical failure; distant metastasis rates; all cause mortality; cancer related mortality.                                 | 4 years.                         |
|                                                                                   | Marzi 2009 (1 paper)                                       | Marzi 2009                                   | Italy     | Dates of enrolment to study: March 2003 to June 2008; Setting: single centre; Age: all; Disease status: T1-T4.                                                 | 162 | 1. Conformal radiotherapy hypofractionated: 62 Gy in 20 fractions over 5 weeks (57 men);<br>2. Conformal radiotherapy: 80 Gy in 40 fractions over 8 weeks (57 men).                                                                                | Late rectal toxicity.                                                                                                                                                                              | Median followup was 30 months.   |
|                                                                                   | Norkus 2009 (2 papers)                                     | Norkus 2009 a,b                              | Lithuania | Dates of enrolment to study: 2004; Setting: single centre; Age: median 63 (range 53-75) in group 1, median 65 (range 50-78) in group 2; Disease status: T1-T3. | 91  | 1. Hypofractionated external beam radiotherapy: 57 Gy given as 13 fractions of 3 Gy plus 4 fractions of 4.5 Gy (47 men).<br>2. Conventionally fractionated external beam radiotherapy: 74 Gy given in 37 fractions of 2 Gy (44 men).               | Biochemical (PSA) response; acute gastrointestinal (GI) and genitourinary (GU) toxicity; overall survival; prostate cancer-related mortality.                                                      | 3 - 12 months.                   |
|                                                                                   | CHHiP trial (1 paper)                                      | Dearnaley 2012                               | UK        | Dates of enrolment to study: Oct 2002 to Aug 2006; Setting: multicentre; Age: median 67 - 68 (range 44-82); Disease status: T1b - T3a NOMO.                    | 457 | 1. Conventional fractionation: 74 Gy in 37 fractions at 2 Gy per fraction (153 men).<br>2. Hypofractionation: 60 Gy in 20 fractions at 3 Gy per fraction (153 men).<br>3. Hypofractionation: 57 Gy in 19 fractions at 3 Gy per fraction (151 men). | Acute bowel toxicity; Acute bladder toxicity; Late bowel toxicity; Late bladder toxicity; Sexual dysfunction.                                                                                      | 50.5 months.                     |
| Conventional radiotherapy v Conformal HD radiotherapy (1 trial)                   | M. D. Anderson randomized dose-escalation trial (4 papers) | Kuban 2008, 2011; Pollack 2002; Storey 2000. | USA       | Dates of enrolment to study: 1993 to 1998; Setting: M. D. Anderson Cancer Center, University of Texas; Median age 69 for each arm; Disease status: T1-T3 NOMO. | 305 | 1. Conventional radiotherapy (150 men): 70 Gy, given in daily 2 Gy fractions.<br>2. 3D conformal radiotherapy (151 men): 78 Gy, given in daily 2 Gy fractions.                                                                                     | freedom from biochemical or clinical failure; freedom from distant metastasis; overall survival; disease-specific survival; late GI toxicity; late GU toxicity; prostate cancer-related mortality. | Median follow-up of 5 - 8 years. |

LD: low dose; HD: high dose.



**Appendix 3.** Assessment of risk of bias for included randomized trials (please refer to [www.cochrane-handbook.org](http://www.cochrane-handbook.org) for instructions on how to complete the tables).

**Outcomes measured:**

a - all cause mortality.

b - cancer related mortality.

c - gastrointestinal and genitourinary toxicity.

**Study ID: CHHiP trial**

| Risk of bias table for outcome c       |                                   |                                                                                                                                           |
|----------------------------------------|-----------------------------------|-------------------------------------------------------------------------------------------------------------------------------------------|
|                                        | Judgement (low/high/unclear risk) | Support for judgement                                                                                                                     |
| Random sequence generation             | Low risk                          | Computer-generated random permuted blocks were used                                                                                       |
| Allocation concealment                 | Low risk                          | Independent randomisation was via telephone to the ICR-CTSU.                                                                              |
| Blinding of participants and personnel | High risk                         | Treatment allocation was not masked and, because of the trial's size, assessors could not be blinded to toxicity or clinical assessments. |
| Blinding of outcome assessment         | High risk                         | Treatment allocation was not masked and, because of the trial's size, assessors could not be blinded to toxicity or clinical assessments. |
| Incomplete outcome data                | Low risk                          | Losses to follow-up are disclosed                                                                                                         |
| Selective reporting                    | Low risk                          | Pre-planned analyses.                                                                                                                     |
| Other bias                             | Low risk                          | No other sources of bias identified.                                                                                                      |

**Study ID: PIVOT trial**

| Risk of bias table for outcomes a, b   |                                   |                                                                                                                      |
|----------------------------------------|-----------------------------------|----------------------------------------------------------------------------------------------------------------------|
|                                        | Judgement (low/high/unclear risk) | Support for judgement                                                                                                |
| Random sequence generation             | Low risk                          | Randomization was stratified according to site and implemented by means of a central interactive telephone system    |
| Allocation concealment                 | Low risk                          | Protocol                                                                                                             |
| Blinding of participants and personnel | Low risk                          | Unmasked design, but we judge that lack of blinding is unlikely to affect mortality or biochemical/clinical relapse. |
| Blinding of outcome                    | Low risk                          | After randomization, a central pathologist reviewed the biopsy and radical-prostatectomy specimens, and a            |



|                                         |                                              |                                                                                                                   |
|-----------------------------------------|----------------------------------------------|-------------------------------------------------------------------------------------------------------------------|
| assessment                              |                                              | central laboratory measured PSA.                                                                                  |
| Incomplete outcome data                 | Low risk                                     | Losses to follow-up described and were low                                                                        |
| Selective reporting                     | Low risk                                     | Protocol                                                                                                          |
| Other bias                              | Low risk                                     | Not identified                                                                                                    |
| <b>Risk of bias table for outcome c</b> |                                              |                                                                                                                   |
|                                         | <b>Judgement</b> (low/<br>high/unclear risk) | <b>Support for judgement</b>                                                                                      |
| Random sequence generation              | Low risk                                     | Randomization was stratified according to site and implemented by means of a central interactive telephone system |
| Allocation concealment                  | Low risk                                     | Protocol                                                                                                          |
| Blinding of participants and personnel  | HIGH risk                                    | Lack of blinding is likely to pose conceptual risks to the toxicity assessment.                                   |
| Blinding of outcome assessment          | High risk                                    | Toxicity outcomes are patient-reported and therefore at high risk of bias.                                        |
| Incomplete outcome data                 | High risk                                    | Moderate losses to follow-up, 23% in each group.                                                                  |
| Selective reporting                     | Low risk                                     | Protocol                                                                                                          |
| Other bias                              | Low risk                                     | Not identified                                                                                                    |

**Study ID: GETUG 06 Tial**

|                                             |                                              |                                                                                                                      |
|---------------------------------------------|----------------------------------------------|----------------------------------------------------------------------------------------------------------------------|
| <b>Risk of bias table for outcomes a, b</b> |                                              |                                                                                                                      |
|                                             | <b>Judgement</b> (low/<br>high/unclear risk) | <b>Support for judgement</b>                                                                                         |
| Random sequence generation                  | Unclear risk                                 | Not stated                                                                                                           |
| Allocation concealment                      | Unclear risk                                 | Not stated                                                                                                           |
| Blinding of participants and personnel      | Low risk                                     | Unmasked design, but we judge that lack of blinding is unlikely to affect mortality or biochemical/clinical relapse. |
| Blinding of outcome assessment              | Low risk                                     | Unmasked design, but we judge that lack of blinding is unlikely to affect mortality or biochemical/clinical relapse. |
| Incomplete outcome data                     | Low risk                                     | Lost to follow-up described                                                                                          |
| Selective reporting                         | Unclear risk                                 | No protocol available                                                                                                |
| Other bias                                  | Low risk                                     | Not identified                                                                                                       |

| <b>Risk of bias table for outcome c</b> |                                              |                                                                                 |
|-----------------------------------------|----------------------------------------------|---------------------------------------------------------------------------------|
|                                         | <b>Judgement</b> (low/<br>high/unclear risk) | <b>Support for judgement</b>                                                    |
| Random sequence generation              | Unclear risk                                 | Not stated                                                                      |
| Allocation concealment                  | Unclear risk                                 | Not stated                                                                      |
| Blinding of participants and personnel  | HIGH risk                                    | Lack of blinding is likely to pose conceptual risks to the toxicity assessment. |
| Blinding of outcome assessment          | HIGH risk                                    | Lack of blinding is likely to pose conceptual risks to the toxicity assessment. |
| Incomplete outcome data                 | Low risk                                     | Lost to follow-up described                                                     |
| Selective reporting                     | Unclear risk                                 | No protocol available                                                           |
| Other bias                              | Low risk                                     | Not identified                                                                  |

**Study ID: Widmark 2011**

| <b>Risk of bias table for outcomes a, b</b> |                                              |                                                                                                                      |
|---------------------------------------------|----------------------------------------------|----------------------------------------------------------------------------------------------------------------------|
|                                             | <b>Judgement</b> (low/<br>high/unclear risk) | <b>Support for judgement</b>                                                                                         |
| Random sequence generation                  | Unclear                                      | No details available.                                                                                                |
| Allocation concealment                      | Unclear                                      | No details available.                                                                                                |
| Blinding of participants and personnel      | Low risk                                     | Unmasked design, but we judge that lack of blinding is unlikely to affect mortality or biochemical/clinical relapse. |
| Blinding of outcome assessment              | Low risk                                     | Unmasked design, but we judge that lack of blinding is unlikely to affect mortality or biochemical/clinical relapse. |
| Incomplete outcome data                     | Unclear                                      | No details available.                                                                                                |
| Selective reporting                         | Unclear                                      | No details available.                                                                                                |
| Other bias                                  | Unclear                                      | No details available.                                                                                                |

**Study ID: Yeoh trial**

| <b>Risk of bias table for outcomes a, b</b> |                                              |                              |
|---------------------------------------------|----------------------------------------------|------------------------------|
|                                             | <b>Judgement</b> (low/<br>high/unclear risk) | <b>Support for judgement</b> |

|                                        |              |                                                                         |
|----------------------------------------|--------------|-------------------------------------------------------------------------|
| Random sequence generation             | Low risk     | Blocked computer-generated random numbers (Yeoh EE 2003)                |
| Allocation concealment                 | Unclear risk | Not clear                                                               |
| Blinding of participants and personnel | Low risk     | Unlikely to pose any conceptual risks to the ascertainment of mortality |
| Blinding of outcome assessment         | Low risk     | Unlikely to pose any conceptual risks to the ascertainment of mortality |
| Incomplete outcome data                | Low risk     | Report Kaplan Meier estimates, log-rank test results.                   |
| Selective reporting                    | Low risk     | Pre-specified                                                           |
| Other bias                             | Low risk     | Not identified                                                          |

**Study ID: Royal Marsden trial**

**Risk of bias table for outcome a**

|                                        | <b>Judgement</b> (low/high/unclear risk) | <b>Support for judgement</b>                                                                                                                                    |
|----------------------------------------|------------------------------------------|-----------------------------------------------------------------------------------------------------------------------------------------------------------------|
| Random sequence generation             | Low risk                                 | "Randomised permuted blocks design from an independent randomisation service offered by the Clinical trials and Statistics Unit, institute of Cancer Research". |
| Allocation concealment                 | Low risk                                 | Allocation carried out by independent randomisation service.                                                                                                    |
| Blinding of participants and personnel | Low risk                                 | Unmasked design, but we judge that lack of blinding is unlikely to pose any conceptual risks to the ascertainment of mortality.                                 |
| Blinding of outcome assessment         | Low risk                                 | Unmasked design, but we judge that lack of blinding is unlikely to pose any conceptual risks to the ascertainment of mortality.                                 |
| Incomplete outcome data                | Low risk                                 | Losses of follow-up disclosed, losses were low and balanced between intervention groups.                                                                        |
| Selective reporting                    | Unclear risk                             | Not clear which outcomes were pre-specified.                                                                                                                    |
| Other bias                             | Low risk                                 | No other sources of bias identified.                                                                                                                            |

**Risk of bias table for outcome c**

|                            | <b>Judgement</b> (low/high/unclear risk) | <b>Support for judgement</b>                                                                                                                                    |
|----------------------------|------------------------------------------|-----------------------------------------------------------------------------------------------------------------------------------------------------------------|
| Random sequence generation | Low risk                                 | "Randomised permuted blocks design from an independent randomisation service offered by the Clinical trials and Statistics Unit, institute of Cancer Research". |

|                                        |           |                                                                                          |
|----------------------------------------|-----------|------------------------------------------------------------------------------------------|
| Allocation concealment                 | Low risk  | Allocation carried out by independent randomisation service.                             |
| Blinding of participants and personnel | High risk | Lack of blinding is likely to pose conceptual risks to the toxicity assessment.          |
| Blinding of outcome assessment         | High risk | Lack of blinding is likely to pose conceptual risks to the toxicity assessment.          |
| Incomplete outcome data                | Low risk  | Losses of follow-up disclosed, losses were low and balanced between intervention groups. |
| Selective reporting                    | High risk | Some cut-off values reporting.                                                           |
| Other bias                             | Low risk  | No other sources of bias identified.                                                     |

**Study ID: Zietman trial**

| <b>Risk of bias table for outcomes a, b</b> |                                              |                                                                                                                                                                                                            |
|---------------------------------------------|----------------------------------------------|------------------------------------------------------------------------------------------------------------------------------------------------------------------------------------------------------------|
|                                             | <b>Judgement</b> (low/<br>high/unclear risk) | <b>Support for judgement</b>                                                                                                                                                                               |
| Random sequence generation                  | Low risk                                     | Central randomization                                                                                                                                                                                      |
| Allocation concealment                      | Low risk                                     | Randomized by external body: randomized centrally by the American College of Radiology statistical office on protocol 95-09 of the Proton Radiation Oncology Group between January 1996 and December 1999. |
| Blinding of participants and personnel      | Low risk                                     | Unlikely to pose any conceptual risks to the ascertainment of mortality and biochemical outcomes                                                                                                           |
| Blinding of outcome assessment              | Low risk                                     | Unlikely to pose any conceptual risks to the ascertainment of mortality and biochemical outcomes                                                                                                           |
| Incomplete outcome data                     | Low risk                                     | Follow-up data completed                                                                                                                                                                                   |
| Selective reporting                         | unclear                                      | No clear                                                                                                                                                                                                   |
| Other bias                                  | Low                                          | Not identified                                                                                                                                                                                             |
| <b>Risk of bias table for outcome c</b>     |                                              |                                                                                                                                                                                                            |
|                                             | <b>Judgement</b> (low/<br>high/unclear risk) | <b>Support for judgement</b>                                                                                                                                                                               |
| Random sequence generation                  | Low risk                                     | Central randomization                                                                                                                                                                                      |
| Allocation concealment                      | Low risk                                     | Randomized by external body: randomized centrally by the American College of Radiology statistical office on protocol 95-09 of the Proton Radiation Oncology Group between January 1996 and December 1999. |
| Blinding of participants and                | High risk                                    | Lack of blinding is likely to poses conceptual risks to                                                                                                                                                    |

|                                |           |                                                                             |
|--------------------------------|-----------|-----------------------------------------------------------------------------|
| personnel                      |           | toxicity assessment                                                         |
| Blinding of outcome assessment | High risk | Lack of blinding is likely to poses conceptual risks to toxicity assessment |
| Incomplete outcome data        | Low risk  | Follow-up data completed                                                    |
| Selective reporting            | Unclear   | No clear                                                                    |
| Other bias                     | Low       | Not identified                                                              |

**Study ID: SPCG-4**

| <b>Risk of bias table for outcomes a, b</b> |                                          |                                                                                                                                                                                                                                                                                   |
|---------------------------------------------|------------------------------------------|-----------------------------------------------------------------------------------------------------------------------------------------------------------------------------------------------------------------------------------------------------------------------------------|
|                                             | <b>Judgement</b> (low/high/unclear risk) | <b>Support for judgement</b>                                                                                                                                                                                                                                                      |
| Random sequence generation                  | Low                                      | Stratification according to tumor grade and randomization center. The randomization list was computer generated, and the block size was unknown to the investigators                                                                                                              |
| Allocation concealment                      | Unclear                                  | Not stated                                                                                                                                                                                                                                                                        |
| Blinding of participants and personnel      | Low                                      | Unmasked design, but we judge that lack of blinding is unlikely to pose any conceptual risks to the ascertainment of mortality.                                                                                                                                                   |
| Blinding of outcome assessment              | Low                                      | "Blinding to analyst". The pathologists were blinded to patient outcome and assignment. Only the results from the central review are used. Members of the endpoint committee were blinded to patients' group assignment and treatment received." Or, "Blinded evaluation (2005)". |
| Incomplete outcome data                     | Low                                      | Losses of follow-up disclose                                                                                                                                                                                                                                                      |
| Selective reporting                         | Low                                      | Outcomes pre-specified                                                                                                                                                                                                                                                            |
| Other bias                                  | Low                                      | Not other sources of bias identified.                                                                                                                                                                                                                                             |
| <b>Risk of bias table for outcome c</b>     |                                          |                                                                                                                                                                                                                                                                                   |
|                                             | <b>Judgement</b> (low/high/unclear risk) | <b>Support for judgement</b>                                                                                                                                                                                                                                                      |
| Random sequence generation                  | Low risk                                 | The randomization list was computer generated (Bill-Axelsson,2002)                                                                                                                                                                                                                |
| Allocation concealment                      | Unclear risk                             | Not stated                                                                                                                                                                                                                                                                        |
| Blinding of participants and personnel      | High risk                                | Unmasked design, and lack of blinding could influence reporting of adverse effects                                                                                                                                                                                                |
| Blinding of outcome assessment              | High risk                                | Outcome assessment was obtained by asking patients to return questionnaire after intervention, from which the blinding of assessor is impossible.                                                                                                                                 |

|                         |              |                                                                                                          |
|-------------------------|--------------|----------------------------------------------------------------------------------------------------------|
| Incomplete outcome data | Low risk     | 88% and 87% of participants return questionnaires from prostatectomy and watchful waiting, respectively. |
| Selective reporting     | Unclear risk | Study report doesn't make clear if this outcome were pre-specified.                                      |
| Other bias              | Low risk     | No other sources of bias identified.                                                                     |

**Study ID: Graversen1990**

| <b>Risk of bias table for outcome a</b> |                                          |                                                                                                                                   |
|-----------------------------------------|------------------------------------------|-----------------------------------------------------------------------------------------------------------------------------------|
|                                         | <b>Judgement</b> (low/high/unclear risk) | <b>Support for judgement</b>                                                                                                      |
| Random sequence generation              | Unclear risk                             | More elderly patients in placebo group                                                                                            |
| Allocation concealment                  | Unclear risk                             | Not stated                                                                                                                        |
| Blinding of participants and personnel  | Low risk                                 | Unmasked design, but we judge that lack of blinding is unlikely to pose any conceptual risks to the ascertainment of mortality.   |
| Blinding of outcome assessment          | Low risk                                 | Unmasked design, but we judge that lack of blinding is unlikely to pose any conceptual risks to the ascertainment of mortality.   |
| Incomplete outcome data                 | High risk                                | Outcome data incomplete.                                                                                                          |
| Selective reporting                     | Unclear risk                             | Not stated                                                                                                                        |
| Other bias                              | High risk                                | 31 stage I and 20 stage II patients were assigned to placebo; 31 stage I and 30 stage II patients were assigned to prostatectomy. |

**Study ID: Canada trial**

| <b>Risk of bias table for outcomes a, b</b> |                                          |                                                                                                                                                        |
|---------------------------------------------|------------------------------------------|--------------------------------------------------------------------------------------------------------------------------------------------------------|
|                                             | <b>Judgement</b> (low/high/unclear risk) | <b>Support for judgement</b>                                                                                                                           |
| Random sequence generation                  | Unclear risk                             | No information given                                                                                                                                   |
| Allocation concealment                      | Unclear risk                             | No information given                                                                                                                                   |
| Blinding of participants and personnel      | Low risk                                 | Unmasked design, but we judge that lack of blinding is unlikely to affect treatment failure, overall survival, biopsy rate, disease-specific survival. |
| Blinding of outcome assessment              | Low risk                                 | No blinding mentioned, but we judge that lack of blinding is unlikely to affect treatment failure, overall survival,                                   |

|                                         |                                              |                                                                                                                |
|-----------------------------------------|----------------------------------------------|----------------------------------------------------------------------------------------------------------------|
|                                         |                                              | biopsy rate, disease-specific survival.                                                                        |
| Incomplete outcome data                 | Low risk                                     | Losses to follow-up are fairly low                                                                             |
| Selective reporting                     | Unclear risk                                 | No information given                                                                                           |
| Other bias                              | Low risk                                     | No other sources of bias identified                                                                            |
| <b>Risk of bias table for outcome c</b> |                                              |                                                                                                                |
|                                         | <b>Judgement</b> (low/<br>high/unclear risk) | <b>Support for judgement</b>                                                                                   |
| Random sequence generation              | Unclear risk                                 | No information given                                                                                           |
| Allocation concealment                  | Unclear risk                                 | No information given                                                                                           |
| Blinding of participants and personnel  | High risk (need further discussion)          | Unmasked design, and lack of blinding could influence reporting of adverse effects                             |
| Blinding of outcome assessment          | High risk (need further discussion)          | No blinding of outcome assessors mentioned, and lack of blinding could influence assessment of adverse effects |
| Incomplete outcome data                 | Low risk                                     | Losses to follow-up are fairly low                                                                             |
| Selective reporting                     | Unclear risk                                 | No information given                                                                                           |
| Other bias                              | Low risk                                     | No other sources of bias identified                                                                            |

**Study ID: MRC RT01**

|                                             |                                              |                                                                                                                                                                                                               |
|---------------------------------------------|----------------------------------------------|---------------------------------------------------------------------------------------------------------------------------------------------------------------------------------------------------------------|
| <b>Risk of bias table for outcomes a, b</b> |                                              |                                                                                                                                                                                                               |
|                                             | <b>Judgement</b> (low/<br>high/unclear risk) | <b>Support for judgement</b>                                                                                                                                                                                  |
| Random sequence generation                  | Low risk                                     | Computer-based minimisation algorithm                                                                                                                                                                         |
| Allocation concealmentLow                   | Low risk                                     | Central allocation                                                                                                                                                                                            |
| Blinding of participants and personnel      | Low risk                                     | Unmasked design, but we judge that lack of blinding is unlikely to affect overall survival                                                                                                                    |
| Blinding of outcome assessment              | Low risk                                     | Unmasked design, but we judge that lack of blinding is unlikely to affect overall survival                                                                                                                    |
| Incomplete outcome data                     | Unclear risk                                 | Losses to follow-up are disclosed and appear balanced across groups for other outcomes reported, but we can't adjust for losses to follow-up for overall survival since this outcome isn't formally reported. |
| Selective reporting                         | Low risk                                     | Outcomes pre-specified in trial protocol                                                                                                                                                                      |

|                                         |                                              |                                                                                                                  |
|-----------------------------------------|----------------------------------------------|------------------------------------------------------------------------------------------------------------------|
| Other bias                              | Low risk                                     | No other sources of bias identified.                                                                             |
| <b>Risk of bias table for outcome c</b> |                                              |                                                                                                                  |
|                                         | <b>Judgement</b> (low/<br>high/unclear risk) | <b>Support for judgement</b>                                                                                     |
| Random sequence generation              | Low risk                                     | Computer-based minimisation algorithm                                                                            |
| Allocation concealment                  | Low risk                                     | Central allocation                                                                                               |
| Blinding of participants and personnel  | High risk                                    | Unmasked design, and lack of blinding could influence reporting of adverse effects                               |
| Blinding of outcome assessment          | High risk                                    | No blinding of outcome assessors mentioned, and lack of blinding could influence assessment of adverse effects   |
| Incomplete outcome data                 | Low risk                                     | Adjustment made for losses to follow-up in calculation of the hazard ratios and cumulative proportions reported. |
| Selective reporting                     | Low risk                                     | Outcomes pre-specified in trial protocol                                                                         |
| Other bias                              | Low risk                                     | No other sources of bias identified.                                                                             |

**Study ID: Chin 2008**

|                                             |                                              |                                                                                                                                                                                    |
|---------------------------------------------|----------------------------------------------|------------------------------------------------------------------------------------------------------------------------------------------------------------------------------------|
| <b>Risk of bias table for outcomes a, b</b> |                                              |                                                                                                                                                                                    |
|                                             | <b>Judgement</b> (low/<br>high/unclear risk) | <b>Support for judgement</b>                                                                                                                                                       |
| Random sequence generation                  | Unclear risk                                 | No information given                                                                                                                                                               |
| Allocation concealment                      | Unclear risk                                 | No information given                                                                                                                                                               |
| Blinding of participants and personnel      | Low risk                                     | Unmasked design, but we judge that lack of blinding is unlikely to affect biochemical disease-free survival, disease specific survival, overall survival and positive biopsy       |
| Blinding of outcome assessment              | Low risk                                     | No blinding mentioned, but we judge that lack of blinding is unlikely to affect biochemical disease-free survival, disease specific survival, overall survival and positive biopsy |
| Incomplete outcome data                     | Unclear risk                                 | No information given                                                                                                                                                               |
| Selective reporting                         | Unclear risk                                 | No information given                                                                                                                                                               |
| Other bias                                  | Low risk                                     | No other sources of bias identified.                                                                                                                                               |
| <b>Risk of bias table for outcome c</b>     |                                              |                                                                                                                                                                                    |



|                                        | <b>Judgement</b> (low/<br>high/unclear risk) | <b>Support for judgement</b>                                                                                   |
|----------------------------------------|----------------------------------------------|----------------------------------------------------------------------------------------------------------------|
| Random sequence generation             | Unclear risk                                 | No information given                                                                                           |
| Allocation concealment                 | Unclear risk                                 | No information given                                                                                           |
| Blinding of participants and personnel | High risk                                    | Unmasked design, and lack of blinding could influence reporting of adverse effects                             |
| Blinding of outcome assessment         | High risk                                    | No blinding of outcome assessors mentioned, and lack of blinding could influence assessment of adverse effects |
| Incomplete outcome data                | Unclear risk                                 | No information given                                                                                           |
| Selective reporting                    | Unclear risk                                 | No information given                                                                                           |
| Other bias                             | Low risk                                     | No other sources of bias identified.                                                                           |

**Study ID: MRC RT01 pilot trial****Risk of bias table for outcome b**

|                                        | <b>Judgement</b> (low/<br>high/unclear risk) | <b>Support for judgement</b>                                                                                  |
|----------------------------------------|----------------------------------------------|---------------------------------------------------------------------------------------------------------------|
| Random sequence generation             | Low                                          | Randomised permuted block design                                                                              |
| Allocation concealment                 | Low                                          | Independent randomisation was undertaken by ICR Clinical Trials and Statistics Unit.                          |
| Blinding of participants and personnel | Low                                          | unlikely to pose any conceptual risks to the ascertainment of biochemical failure or local/metastatic failure |
| Blinding of outcome assessment         | Low                                          | unlikely to pose any conceptual risks to the ascertainment of biochemical failure or local/metastatic failure |
| Incomplete outcome data                | Low                                          | Losses of follow-up disclosed                                                                                 |
| Selective reporting                    | Unclear                                      | Unclear whether outcomes reported were pre-specified in the protocol.                                         |
| Other bias                             | Low                                          | Not identified                                                                                                |

**Risk of bias table for outcome c**

|                            | <b>Judgement</b> (low/<br>high/unclear risk) | <b>Support for judgement</b>     |
|----------------------------|----------------------------------------------|----------------------------------|
| Random sequence generation | Low                                          | Randomised permuted block design |

|                                        |           |                                                                                                                |
|----------------------------------------|-----------|----------------------------------------------------------------------------------------------------------------|
| Allocation concealment                 | Low       | Independent randomisation was undertaken by ICR Clinical Trials and Statistics Unit.                           |
| Blinding of participants and personnel | High risk | Unmasked design, and lack of blinding could influence reporting of adverse effects                             |
| Blinding of outcome assessment         | High risk | No blinding of outcome assessors mentioned, and lack of blinding could influence assessment of adverse effects |
| Incomplete outcome data                | Low       | Losses of follow-up disclosed                                                                                  |
| Selective reporting                    | Unclear   | Unclear whether outcomes reported were pre-specified in the protocol.                                          |
| Other bias                             | Low       | Not identified                                                                                                 |

**Study ID: Akakura 2006**

| <b>Risk of bias table for outcomes a, b</b> |                                          |                                                                                                                                                                                                         |
|---------------------------------------------|------------------------------------------|---------------------------------------------------------------------------------------------------------------------------------------------------------------------------------------------------------|
|                                             | <b>Judgement (low/high/unclear risk)</b> | <b>Support for judgement</b>                                                                                                                                                                            |
| Random sequence generation                  | Unclear risk                             | No details given, but may be reported in the earlier design paper                                                                                                                                       |
| Allocation concealment                      | Unclear risk                             | No details given, but may be reported in the earlier design paper                                                                                                                                       |
| Blinding of participants and personnel      | Low risk                                 | Unmasked design, but we judge that lack of blinding is unlikely to affect biochemical progression-free survival, clinical progression-free survival, cause-specific survival and overall survival       |
| Blinding of outcome assessment              | Low risk                                 | No blinding mentioned, but we judge that lack of blinding is unlikely to affect biochemical progression-free survival, clinical progression-free survival, cause-specific survival and overall survival |
| Incomplete outcome data                     | Unclear risk                             | No information given                                                                                                                                                                                    |
| Selective reporting                         | Unclear risk                             | No information given                                                                                                                                                                                    |
| Other bias                                  | Low risk                                 | No other sources of bias identified                                                                                                                                                                     |

**Study ID: Arcangeli 2010**

| <b>Risk of bias table for outcome c</b> |                                          |                              |
|-----------------------------------------|------------------------------------------|------------------------------|
|                                         | <b>Judgement (low/high/unclear risk)</b> | <b>Support for judgement</b> |
| Random sequence generation              | Unclear risk                             | No information               |

|                                             |                                          |                                                                                                        |
|---------------------------------------------|------------------------------------------|--------------------------------------------------------------------------------------------------------|
| Allocation concealment                      | Unclear risk                             | No information                                                                                         |
| Blinding of participants and personnel      | High risk                                | Lack of blinding is likely to poses conceptual risks to toxicity assessment                            |
| Blinding of outcome assessment              | High risk                                | Lack of blinding is likely to pose conceptual risk to the toxicity assessment.                         |
| Incomplete outcome data                     | Low risk                                 | No lost to follow-up                                                                                   |
| Selective reporting                         | Unclear risk                             | No protocol information                                                                                |
| Other bias                                  | Low risk                                 | Not identified                                                                                         |
| <b>Risk of bias table for outcomes a, b</b> |                                          |                                                                                                        |
|                                             | <b>Judgement</b> (low/high/unclear risk) | <b>Support for judgement</b>                                                                           |
| Random sequence generation                  | Unclear risk                             | No information                                                                                         |
| Allocation concealment                      | Unclear risk                             | No information                                                                                         |
| Blinding of participants and personnel      | Low risk                                 | We judge that blinding is less likely to poses high risk on survival and biochemical/clinical outcomes |
| Blinding of outcome assessment              | Low risk                                 | We judge that blinding is less likely to poses high risk on survival and biochemical/clinical outcomes |
| Incomplete outcome data                     | Low risk                                 | No lost to follow-up                                                                                   |
| Selective reporting                         | Unclear risk                             | No protocol information                                                                                |
| Other bias                                  | Low risk                                 | Not identified                                                                                         |

**Study ID: Kopper trial**

|                                         |                                          |                                                                                 |
|-----------------------------------------|------------------------------------------|---------------------------------------------------------------------------------|
| <b>Risk of bias table for outcome c</b> |                                          |                                                                                 |
|                                         | <b>Judgement</b> (low/high/unclear risk) | <b>Support for judgement</b>                                                    |
| Random sequence generation              | Unclear                                  | No information                                                                  |
| Allocation concealment                  | Unclear                                  | No information                                                                  |
| Blinding of participants and personnel  | High                                     | Lack of blinding is likely to pose conceptual risks to the toxicity assessment. |
| Blinding of outcome assessment          | High                                     | Lack of blinding is likely to pose conceptual risks to the toxicity assessment. |
| Incomplete outcome data                 | Low                                      | Follow-up completed in (Kopper 2004)                                            |

|                     |         |                                              |
|---------------------|---------|----------------------------------------------|
| Selective reporting | Unclear | Not clear which outcomes were pre-specified. |
| Other bias          | Low     | No other sources of bias identified          |

**Study ID: Lukka 2005**

| <b>Risk of bias table for outcomes a, b</b> |                                              |                                                                                                                                                                                                                                                    |
|---------------------------------------------|----------------------------------------------|----------------------------------------------------------------------------------------------------------------------------------------------------------------------------------------------------------------------------------------------------|
|                                             | <b>Judgement</b> (low/<br>high/unclear risk) | <b>Support for judgement</b>                                                                                                                                                                                                                       |
| Random sequence generation                  | Low risk                                     | "Patients were assigned...according to a central computer-generated randomization schedule..."                                                                                                                                                     |
| Allocation concealment                      | Low risk                                     | Central allocation                                                                                                                                                                                                                                 |
| Blinding of participants and personnel      | Low risk                                     | Unmasked design, but we judge that lack of blinding is unlikely to affect overall survival.                                                                                                                                                        |
| Blinding of outcome assessment              | Low risk                                     | Unmasked design, but we judge that lack of blinding is unlikely to affect measurement of overall survival.                                                                                                                                         |
| Incomplete outcome data                     | Low risk                                     | Losses to follow-up are balanced across groups, and taken into account in analysis.                                                                                                                                                                |
| Selective reporting                         | Low risk                                     | Methods section implies that all outcomes reported were pre-specified and approved by the study Steering Committee. The primary outcome was altered to an outcome of increasing importance in emerging literature, before the data were unblinded. |
| Other bias                                  | Low risk                                     | No other sources of bias identified.                                                                                                                                                                                                               |
| <b>Risk of bias table for outcome c</b>     |                                              |                                                                                                                                                                                                                                                    |
|                                             | <b>Judgement</b> (low/<br>high/unclear risk) | <b>Support for judgement</b>                                                                                                                                                                                                                       |
| Random sequence generation                  | Low risk                                     | "Patients were assigned...according to a central computer-generated randomization schedule..."                                                                                                                                                     |
| Allocation concealment                      | Low risk                                     | Central allocation                                                                                                                                                                                                                                 |
| Blinding of participants and personnel      | High risk                                    | Lack of blinding is likely to pose conceptual risks to the toxicity assessment.                                                                                                                                                                    |
| Blinding of outcome assessment              | High risk                                    | Lack of blinding is likely to pose conceptual risks to the toxicity assessment.                                                                                                                                                                    |
| Incomplete outcome data                     | Low risk                                     | Losses to follow-up are balanced across groups, and taken into account in analysis.                                                                                                                                                                |
| Selective reporting                         | Low risk                                     | Methods section implies that all outcomes reported were pre-specified and approved by the study Steering Committee. The primary outcome was altered to an outcome of increasing importance in emerging literature, before the data were unblinded. |

|            |          |                                      |
|------------|----------|--------------------------------------|
| Other bias | Low risk | No other sources of bias identified. |
|------------|----------|--------------------------------------|

**Study ID: Marzi 2009**

| <b>Risk of bias table for outcome c</b> |                                              |                                                                                                                |
|-----------------------------------------|----------------------------------------------|----------------------------------------------------------------------------------------------------------------|
|                                         | <b>Judgement</b> (low/<br>high/unclear risk) | <b>Support for judgement</b>                                                                                   |
| Random sequence generation              | Unclear risk                                 | No information.                                                                                                |
| Allocation concealment                  | Unclear risk                                 | No information.                                                                                                |
| Blinding of participants and personnel  | High risk                                    | Unmasked design, and lack of blinding could influence reporting of adverse effects                             |
| Blinding of outcome assessment          | High risk                                    | No blinding of outcome assessors mentioned, and lack of blinding could influence assessment of adverse effects |
| Incomplete outcome data                 | High risk                                    | Losses to follow-up are fairly high and no information is given about the patients lost to follow-up.          |
| Selective reporting                     | Unclear risk                                 | Not clear which outcomes were pre-specified.                                                                   |
| Other bias                              | Low risk                                     | No other sources of bias identified.                                                                           |

**Study ID: Norkus 2009**

| <b>Risk of bias table for outcomes a, b</b> |                                              |                                                                                                                                                                                     |
|---------------------------------------------|----------------------------------------------|-------------------------------------------------------------------------------------------------------------------------------------------------------------------------------------|
|                                             | <b>Judgement</b> (low/<br>high/unclear risk) | <b>Support for judgement</b>                                                                                                                                                        |
| Random sequence generation                  | Unclear                                      | Methods not stated                                                                                                                                                                  |
| Allocation concealment                      | Unclear                                      | Methods not stated                                                                                                                                                                  |
| Blinding of participants and personnel      | Low risk                                     | Unmasked design, but we judge that lack of blinding is unlikely to pose any conceptual risks to the ascertainment of mortality and disease control.                                 |
| Blinding of outcome assessment              | Low risk                                     | Unmasked design, but we judge that lack of blinding is unlikely to pose any conceptual risks to the ascertainment of mortality and disease control.                                 |
| Incomplete outcome data                     | Low risk                                     | Low losses to follow-up                                                                                                                                                             |
| Selective reporting                         | Low risk                                     | The two 2009 papers list the planned endpoints and report the early 12-month findings. It's unlikely that other pre-specified outcomes would be omitted at this stage of the trial. |
| Other bias                                  | Low risk                                     | No other bias identified                                                                                                                                                            |

## Study ID: Dutch trial

| Risk of bias table for outcomes a, b      |                                       |                                                                                                         |
|-------------------------------------------|---------------------------------------|---------------------------------------------------------------------------------------------------------|
|                                           | Judgement (low/<br>high/unclear risk) | Support for judgement                                                                                   |
| Random sequence generation                | Low risk                              | Random assignment was performed with a minimization technique with stratification for treatment group   |
| Allocation concealment                    | Low risk                              | Random assignment was performed with a minimization technique with stratification for treatment group   |
| Blinding of participants and personnel    | Low risk                              | Not clear but low risk for mortality                                                                    |
| Blinding of outcome assessment            | Low risk                              | Not clear but low risk for mortality                                                                    |
| Incomplete outcome data                   | Low risk                              | Losses to follow-up disclosed.                                                                          |
| Selective reporting                       | Unclear risk                          | Not clear which outcomes were pre-specified.                                                            |
| Other bias                                | Low risk                              | No other sources of bias identified.                                                                    |
| Risk of bias table for the rest outcome c |                                       |                                                                                                         |
|                                           | Judgement (low/<br>high/unclear risk) | Support for judgement                                                                                   |
| Random sequence generation                | Low risk                              | Random assignment was performed with a minimization technique with stratification for treatment group   |
| Allocation concealment                    | Low risk                              | Random assignment was performed with a minimization technique with stratification for treatment group   |
| Blinding of participants and personnel    | High risk                             | Unmasked design, and lack of blinding could influence reporting of toxicity                             |
| Blinding of outcome assessment            | High risk                             | No blinding of outcome assessors mentioned, and lack of blinding could influence assessment of toxicity |
| Incomplete outcome data                   | Low risk                              | Losses to follow-up disclosed.                                                                          |
| Selective reporting                       | Unclear risk                          | Not clear which outcomes were pre-specified.                                                            |
| Other bias                                | Low risk                              | No other sources of bias identified.                                                                    |

## Study ID: M. D. Anderson trial

| Risk of bias table for outcomes a, b |                                       |                       |
|--------------------------------------|---------------------------------------|-----------------------|
|                                      | Judgement (low/<br>high/unclear risk) | Support for judgement |

|                                         |                                          |                                                                                                                                                                  |
|-----------------------------------------|------------------------------------------|------------------------------------------------------------------------------------------------------------------------------------------------------------------|
| Random sequence generation              | Unclear risk                             | No information.                                                                                                                                                  |
| Allocation concealment                  | Unclear risk                             | No information.                                                                                                                                                  |
| Blinding of participants and personnel  | Low risk                                 | Unmasked design, but we judge that lack of blinding is unlikely to pose any conceptual risks to the ascertainment of mortality and disease progression outcomes. |
| Blinding of outcome assessment          | Low risk                                 | Unmasked design, but we judge that lack of blinding is unlikely to pose any conceptual risks to the ascertainment of mortality and disease progression outcomes. |
| Incomplete outcome data                 | Unclear risk                             | No data on losses to follow-up                                                                                                                                   |
| Selective reporting                     | Unclear risk                             | Not clear which outcomes were pre-specified.                                                                                                                     |
| Other bias                              | Low risk                                 | No other sources of bias identified.                                                                                                                             |
| <b>Risk of bias table for outcome c</b> |                                          |                                                                                                                                                                  |
|                                         | <b>Judgement</b> (low/high/unclear risk) | <b>Support for judgement</b>                                                                                                                                     |
| Random sequence generation              | Unclear risk                             | No information.                                                                                                                                                  |
| Allocation concealment                  | Unclear risk                             | No information.                                                                                                                                                  |
| Blinding of participants and personnel  | High risk                                | Unmasked design, and lack of blinding could influence reporting of toxicity                                                                                      |
| Blinding of outcome assessment          | High risk                                | No blinding of outcome assessors mentioned, and lack of blinding could influence assessment of toxicity                                                          |
| Incomplete outcome data                 | Unclear risk                             | No data on losses to follow-up                                                                                                                                   |
| Selective reporting                     | Unclear risk                             | Cut-points may have been chosen based on significance.                                                                                                           |
| Other bias                              | Low risk                                 | No other sources of bias identified.                                                                                                                             |

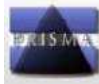

# PRISMA 2009 Checklist

1  
2  
3  
4  
5  
6  
7  
8  
9  
10  
11  
12  
13  
14  
15  
16  
17  
18  
19  
20  
21  
22  
23  
24  
25  
26  
27  
28  
29  
30  
31  
32  
33  
34  
35  
36  
37  
38  
39  
40  
41  
42  
43  
44  
45  
46  
47  
48  
49

| Section/topic                      | #  | Checklist item                                                                                                                                                                                                                                                                                              | Reported on page # |
|------------------------------------|----|-------------------------------------------------------------------------------------------------------------------------------------------------------------------------------------------------------------------------------------------------------------------------------------------------------------|--------------------|
| <b>TITLE</b>                       |    |                                                                                                                                                                                                                                                                                                             |                    |
| Title                              | 1  | Identify the report as a systematic review, meta-analysis, or both.                                                                                                                                                                                                                                         | 1                  |
| <b>ABSTRACT</b>                    |    |                                                                                                                                                                                                                                                                                                             |                    |
| Structured summary                 | 2  | Provide a structured summary including, as applicable: background; objectives; data sources; study eligibility criteria, participants, and interventions; study appraisal and synthesis methods; results; limitations; conclusions and implications of key findings; systematic review registration number. | 2                  |
| <b>INTRODUCTION</b>                |    |                                                                                                                                                                                                                                                                                                             |                    |
| Rationale                          | 3  | Describe the rationale for the review in the context of what is already known.                                                                                                                                                                                                                              | 4 – 5              |
| Objectives                         | 4  | Provide an explicit statement of questions being addressed with reference to participants, interventions, comparisons, outcomes, and study design (PICOS).                                                                                                                                                  | 4 – 5              |
| <b>METHODS</b>                     |    |                                                                                                                                                                                                                                                                                                             |                    |
| Protocol and registration          | 5  | Indicate if a review protocol exists, if and where it can be accessed (e.g., Web address), and, if available, provide registration information including registration number.                                                                                                                               | N/A                |
| Eligibility criteria               | 6  | Specify study characteristics (e.g., PICOS, length of follow-up) and report characteristics (e.g., years considered, language, publication status) used as criteria for eligibility, giving rationale.                                                                                                      | 6                  |
| Information sources                | 7  | Describe all information sources (e.g., databases with dates of coverage, contact with study authors to identify additional studies) in the search and date last searched.                                                                                                                                  | 6                  |
| Search                             | 8  | Present full electronic search strategy for at least one database, including any limits used, such that it could be repeated.                                                                                                                                                                               | Appendix 1         |
| Study selection                    | 9  | State the process for selecting studies (i.e., screening, eligibility, included in systematic review, and, if applicable, included in the meta-analysis).                                                                                                                                                   | 6 – 7<br>Figure 1  |
| Data collection process            | 10 | Describe method of data extraction from reports (e.g., piloted forms, independently, in duplicate) and any processes for obtaining and confirming data from investigators.                                                                                                                                  | 7                  |
| Data items                         | 11 | List and define all variables for which data were sought (e.g., PICOS, funding sources) and any assumptions and simplifications made.                                                                                                                                                                       | 7                  |
| Risk of bias in individual studies | 12 | Describe methods used for assessing risk of bias of individual studies (including specification of whether this was done at the study or outcome level), and how this information is to be used in any data synthesis.                                                                                      | 7                  |
| Summary measures                   | 13 | State the principal summary measures (e.g., risk ratio, difference in means).                                                                                                                                                                                                                               | 8                  |
| Synthesis of results               | 14 | Describe the methods of handling data and combining results of studies, if done, including measures of consistency (e.g., $I^2$ ) for each meta-analysis.                                                                                                                                                   | 8 – 10             |





# PRISMA 2009 Checklist

1  
2  
3  
4  
5  
6  
7  
8  
9  
10  
11  
12  
13  
14  
15  
16  
17  
18  
19  
20  
21  
22  
23  
24  
25  
26  
27  
28  
29  
30  
31  
32  
33  
34  
35  
36  
37  
38  
39  
40  
41  
42  
43  
44  
45  
46  
47  
48  
49

| Section/topic                 | #  | Checklist item                                                                                                                                                                                           | Reported on page # |
|-------------------------------|----|----------------------------------------------------------------------------------------------------------------------------------------------------------------------------------------------------------|--------------------|
| Risk of bias across studies   | 15 | Specify any assessment of risk of bias that may affect the cumulative evidence (e.g., publication bias, selective reporting within studies).                                                             | 7 – 10             |
| Additional analyses           | 16 | Describe methods of additional analyses (e.g., sensitivity or subgroup analyses, meta-regression), if done, indicating which were pre-specified.                                                         | 9 – 10             |
| <b>RESULTS</b>                |    |                                                                                                                                                                                                          |                    |
| Study selection               | 17 | Give numbers of studies screened, assessed for eligibility, and included in the review, with reasons for exclusions at each stage, ideally with a flow diagram.                                          | 11                 |
| Study characteristics         | 18 | For each study, present characteristics for which data were extracted (e.g., study size, PICOS, follow-up period) and provide the citations.                                                             | Appendix 2         |
| Risk of bias within studies   | 19 | Present data on risk of bias of each study and, if available, any outcome level assessment (see item 12).                                                                                                | Figure 2           |
| Results of individual studies | 20 | For all outcomes considered (benefits or harms), present, for each study: (a) simple summary data for each intervention group (b) effect estimates and confidence intervals, ideally with a forest plot. | 12 – 14            |
| Synthesis of results          | 21 | Present results of each meta-analysis done, including confidence intervals and measures of consistency.                                                                                                  | 12 – 14            |
| Risk of bias across studies   | 22 | Present results of any assessment of risk of bias across studies (see Item 15).                                                                                                                          | Appendix 3         |
| Additional analysis           | 23 | Give results of additional analyses, if done (e.g., sensitivity or subgroup analyses, meta-regression [see Item 16]).                                                                                    | 12 – 21            |
| <b>DISCUSSION</b>             |    |                                                                                                                                                                                                          |                    |
| Summary of evidence           | 24 | Summarize the main findings including the strength of evidence for each main outcome; consider their relevance to key groups (e.g., healthcare providers, users, and policy makers).                     | 23                 |
| Limitations                   | 25 | Discuss limitations at study and outcome level (e.g., risk of bias), and at review-level (e.g., incomplete retrieval of identified research, reporting bias).                                            | 23                 |
| Conclusions                   | 26 | Provide a general interpretation of the results in the context of other evidence, and implications for future research.                                                                                  | 24                 |
| <b>FUNDING</b>                |    |                                                                                                                                                                                                          |                    |
| Funding                       | 27 | Describe sources of funding for the systematic review and other support (e.g., supply of data); role of funders for the systematic review.                                                               | 25                 |

From: Moher D, Liberati A, Tetzlaff J, Altman DG, The PRISMA Group (2009). Preferred Reporting Items for Systematic Reviews and Meta-Analyses: The PRISMA Statement. PLoS Med 6(6): e1000097. doi:10.1371/journal.pmed1000097

For more information, visit: [www.prisma-statement.org](http://www.prisma-statement.org).
